# Supplementary material for: Characterization of the Nuclear Proteome of Chlamydomonas in Response to Salt Stress
Source: Preprints.org preprint supplement (doi:10.20944/preprints202206.0016.v1), 2022-06-01
Supplement: Supplementary file 2 [file TableS1_Proteins identified_v1.xlsx]

## Sheet: Classification_all_323
Table S1. All proteins identified in nuclear proteome of Chlamydomonas reinhardtii in salt stress
Columns indicate: Phytozome ID, Phytozome description, location prediction according to SUBA, PredAlgo, NucPred. Fold Change calculate according to median expression Treatment/Control and expression of protein
Nucleolar protein - nucleosome biogenesis
Phytozome ID	Phytozome Description	Suba	PredAlgo	NucPred	Fold Change	Expression
Cre06.g260850.t1.2	Nucleolar protein	Nuclear	Chloroplast	Not Nuclear	-14.924	Downregulated
Cre08.g370601.t1.1	U3 small nucleolar RNA associated protein MPP10 (MPP10)	Nuclear	Mitochondrion	Not Nuclear	-0.98681	Downregulated
Cre06.g250950.t1.2	U2 snRNP auxiliary factor	Nuclear	Nuclear	Not Nuclear	-0.984173	Downregulated
Cre06.g255950.t1.1	U3 small nucleolar RNA associated protein 18 (UTP18)	Nuclear	Nuclear	Nuclear	-0.958973	Downregulated
Cre07.g344050.t1.1	U3 small nucleolar RNA-associated protein 13 (UTP13)	Nuclear	Nuclear	Nuclear	-0.956298	Downregulated
Cre09.g391652.t1.1	nucleolar complex protein 2 (NOC2)	Nuclear	Chloroplast	Not Nuclear	-0.955728	Downregulated
Cre12.g502800.t1.2	U3 small nucleolar RNA	Nuclear	Nuclear	Not Nuclear	-0.953252	Downregulated
Cre05.g237700.t1.2	Nucleolar protein	Nuclear		Nuclear	-0.948215	Downregulated
Cre02.g077300.t1.2	Nucleolar protein	Nuclear	Nuclear	Nuclear	-0.947125	Downregulated
Cre09.g394399.t1.1	U3 small nucleolar RNA associated protein 3 (UTP3	Nuclear	Nuclear	Not Nuclear	-0.944414	Downregulated
Cre10.g459500.t1.1	Nucleolar GTP binding protein	Nuclear	Nuclear	Not Nuclear	-0.940805	Downregulated
Cre10.g442000.t1.2	U3 small nucleolar RNA associated protein 6 (UTP6)	Nuclear	Nuclear	Nuclear	-0.92179	Downregulated
Cre16.g659600.t1.1	nucleolar complex protein 3 (NOC3)	Nuclear	Nuclear	Not Nuclear	-0.915924	Downregulated
Cre13.g606850.t1.2	U3 small nucleolar RNA associated protein 4 (UTP4)	Nuclear,Cytosol	Nuclear	Nuclear	-0.913891	Downregulated
Cre10.g438700.t1.1	U3 small nucleolar RNA associated protein 12 (DIP2	Nuclear	Nuclear	Nuclear	-0.913572	Downregulated
Cre12.g548000.t1.2	U3 small nucleolar RNA associated protein 10 (UTP10)	Plasma Membrane	Mitochondrion	Not Nuclear	-0.908962	Downregulated
Cre12.g525200.t1.2	Nucleolar protein	Nuclear	Nuclear	Nuclear	-0.905991	Downregulated
Cre10.g441400.t1.2	Nucleolar protein	Nuclear	Nuclear	Nuclear	-0.905146	Downregulated
Cre16.g656250.t1.1	U1 small nuclear ribonucleoprotein	Nuclear	Nuclear	Not Nuclear	-0.90355	Downregulated
Cre02.g104650.t2.1	nucleolar protein 4 (NOP4	Nuclear	Nuclear	Not Nuclear	-0.897785	Downregulated
Cre06.g254150.t1.2	Nucleolar protein	Cytosol	Nuclear	Nuclear	-0.887702	Downregulated
Cre12.g538500.t1.1	U3 small nucleolar RNA associated protein 5 (UTP5	Nuclear	Nuclear	Nuclear	-0.887108	Downregulated
Cre17.g737250.t1.2	U5 small nuclear ribonucleoprotein protein	Cytosol	Nuclear	Nuclear	-0.884693	Downregulated
Cre01.g055400.t1.2	NUCLEOLAR AND COILED BODY PHOSPHOPROTEIN 1	Nuclear	Nuclear	Not Nuclear	-0.881738	Downregulated
Cre16.g690500.t1.2	Nucleolar protein	Nuclear	Nuclear	Nuclear	-0.875085	Downregulated
Uncharacterized
Phytozome ID	Phytozome Description	Suba	PredAlgo	NucPred	Fold Change	Expression
Cre08.g382150.t1.1	uncharacterized		Nuclear	Not Nuclear	-15.5797	Downregulated
Cre02.g118750.t1.1	uncharacterized		Nuclear	Nuclear	-15.4901	Downregulated
Cre14.g610900.t1.1	PROGESTERONE INDUCED BLOCKING FACTOR 1		Nuclear	Not Nuclear	-14.8335	Downregulated
Cre12.g497650.t1.2	Predicted protein	Cytosol	Nuclear	Nuclear	1.01457	Upregulated
Cre05.g242858.t1.1	uncharacterized		Mitochondrion	Nuclear	1.00274	Upregulated
Cre08.g375850.t1.2	uncharacterized	Nuclear	Nuclear	Nuclear	-0.992755	Downregulated
Cre16.g689311.t1.1	uncharacterized		Nuclear	Not Nuclear	-0.986701	Downregulated
Cre03.g177950.t1.1	FAMILY NOT NAMED // MUCIN 14A		Secretory Pathway	Not Nuclear	-0.986289	Downregulated
Cre16.g691550.t1.2	uncharacterized		Nuclear	Nuclear	-0.974673	Downregulated
Cre16.g680588.t1.1	uncharacterized		Mitochondrion	Not Nuclear	-0.973131	Downregulated
Cre19.g750147.t1.1	uncharacterized		Chloroplast	Not Nuclear	-0.972218	Downregulated
Cre02.g084000.t1.2	uncharacterized		Chloroplast	Nuclear	-0.971388	Downregulated
Cre03.g152150.t1.2	uncharacterized	Nuclear	Nuclear	Nuclear	-0.964843	Downregulated
Cre06.g257300.t1.1	uncharacterized		Nuclear	Not Nuclear	-0.960854	Downregulated
Cre10.g452500.t1.2	UNCHARACTERIZED // PROTEIN F58B3.4	Nuclear	Nuclear	Not Nuclear	-0.958067	Downregulated
Cre11.g467757.t2.1	uncharacterized		Nuclear	Not Nuclear	-0.955301	Downregulated
Cre02.g084600.t1.2	uncharacterized		Nuclear	Nuclear	-0.954692	Downregulated
Cre07.g344900.t2.1	uncharacterized		Chloroplast	Not Nuclear	-0.954578	Downregulated
Cre16.g677900.t1.1	uncharacterized		Secretory Pathway	Nuclear	-0.953385	Downregulated
Cre06.g259100.t1.1	uncharacterized		Chloroplast	Not Nuclear	-0.950607	Downregulated
Cre06.g270600.t1.1	uncharacterized		Mitochondrion	Not Nuclear	-0.948995	Downregulated
Cre09.g400000.t1.1	uncharacterized		Nuclear	Not Nuclear	-0.948513	Downregulated
Cre14.g633950.t1.2	uncharacterized		Secretory Pathway	Nuclear	-0.94757	Downregulated
Cre17.g738850.t1.2	uncharacterized	Nuclear	Chloroplast	Not Nuclear	-0.940615	Downregulated
Cre02.g081250.t1.2	uncharacterized	Chloroplast	Chloroplast	Nuclear	-0.936635	Downregulated
Cre03.g163700.t1.2	uncharacterized		Nuclear	Nuclear	-0.936003	Downregulated
Cre11.g482450.t1.2	uncharacterized		Nuclear	Nuclear	-0.935775	Downregulated
Cre09.g390450.t1.2	uncharacterized		Nuclear	Nuclear	-0.92827	Downregulated
Cre07.g330900.t1.2	uncharacterized		Nuclear	Not Nuclear	-0.926777	Downregulated
Cre01.g013650.t1.1	FAMILY NOT NAMED // DIKAR	Nuclear	Nuclear	Not Nuclear	-0.925722	Donwregulated
Cre02.g095146.t1.1	uncharacterized		Nuclear	Not Nuclear	-0.908187	Downregulated
Cre06.g273450.t1.1	uncharacterized		Nuclear	Not Nuclear	-0.90815	Downregulated
Cre01.g005813.t1.2	uncharacterized		Nuclear	Not Nuclear	-0.905908	Downregulated
Cre09.g401923.t1.1	uncharacterized		Nuclear	Nuclear	-0.904294	Downregulated
Cre09.g392800.t1.1	uncharacterized		Nuclear	Nuclear	-0.903088	Downregulated
Cre06.g261400.t1.1	Uncharacterized conserved protein	Nuclear	Mitochondrion	Not Nuclear	-0.901487	Downregulated
Cre06.g268700.t1.1	STRUCTURAL MAINTENANCE OF CHROMOSOMES SMC FAMILY MEMBER // SUBFAMILY NOT NAMED		Nuclear	Not Nuclear	-0.898117	Downregulated
Cre06.g257700.t1.1	uncharacterized		Nuclear	Not Nuclear	-0.894509	Downregulated
Cre06.g263250.t1.1	uncharacterized		Nuclear	Not Nuclear	-0.892662	Downregulated
Cre11.g467620.t1.1	uncharacterized		Nuclear	Not Nuclear	-0.889117	Downregulated
Cre12.g520200.t1.1	Conserved in the Plant Lineage	Chloroplast	Chloroplast	Nuclear	-0.862001	Downregulated
Cre16.g687182.t1.1	uncharacterized		Mitochondrion	Nuclear	-0.851207	Downregulated
Translation and ribosome biogenesis
Phytozome ID	Phytozome Description	Suba	PredAlgo	NucPred	Fold Change	Expression
Cre06.g289550.t1.2	Cytosolic 80S ribosomal protein L32	Cytosol	Nuclear	Not Nuclear	-16.224	Donwregulated
Cre02.g091100.t1.2	Cytosolic 80S ribosomal protein L15	Cytosol	Nuclear	Not Nuclear	-16.0581	Donwregulated
Cre08.g360900.t1.2	Cytosolic 80S ribosomal protein S15	Cytosol	Nuclear	Nuclear	-15.9288	Donwregulated
Cre06.g264300.t1.2	Chloroplast ribosomal protein S15	Mitochondrion	Chloroplast	Nuclear	-15.8002	Donwregulated
Cre12.g512600.t1.2	Cytosolic 80S ribosomal protein L18	Cytosol	Chloroplast	Nuclear	-15.6864	Donwregulated
Cre08.g359750.t2.1	Cytosolic 80S ribosomal protein S9	Cytosol	Nuclear	Nuclear	-15.4611	Donwregulated
Cre14.g612450.t1.2	Chloroplast ribosomal protein L15	Chloroplast	Chloroplast	Nuclear	1.02613	Upregulated
Cre16.g666301.t1.2	Cytosolic 80S ribosomal protein S30	Nuclear,Cytosol		Nuclear	1.01823	Upregulated
Cre09.g409500.t1.2	RIBONUCLEASE P SUBUNIT P25	Nuclear	Nuclear	Nuclear	1.00599	Upregulated
Cre08.g382500.t1.2	Cytosolic 80S ribosomal protein S25	Nuclear	Nuclear	Nuclear	-0.995687	Donwregulated
Cre12.g494450.t1.2	Chloroplast ribosomal protein S16	Chloroplast	Chloroplast	Nuclear	-0.994016	Donwregulated
Cre09.g401663.t1.1	ribosomal RNA processing protein 36 (RRP36)	Nuclear	Chloroplast	Not Nuclear	-0.993949	Donwregulated
Cre03.g203450.t1.2	Cytosolic 80S ribosomal protein S21	Cytosol	Nuclear	Nuclear	-0.990772	Donwregulated
Cre08.g358556.t2.1	Cytosolic 80S ribosomal protein S29	Nuclear,Cytosol		Nuclear	-0.983478	Donwregulated
Cre09.g391097.t2.1	Cytosolic 80S ribosomal protein L4	Cytosol	Nuclear	Not Nuclear	-0.981489	Donwregulated
Cre02.g101350.t1.2	Cytosolic 80S ribosomal protein L10a	Cytosol	Nuclear	Nuclear	-0.980362	Donwregulated
Cre13.g573351.t1.2	small subunit ribosomal protein S16e (RP S16e	Cytosol	Nuclear	Nuclear	-0.97568	Donwregulated
Cre13.g568900.t1.2	Cytosolic 80S ribosomal protein L17	Chloroplast,Nuclear,Cytosol	Nuclear	Not Nuclear	-0.971993	Donwregulated
Cre10.g435800.t1.2	Chloroplast stem loop binding protein 41b	Chloroplast	Chloroplast	Nuclear	-0.971496	Donwregulated
Cre01.g039250.t2.1	Cytosolic 80S ribosomal protein S2	Cytosol	Nuclear	Nuclear	-0.970423	Donwregulated
Cre10.g440050.t1.2	Chloroplast stem loop binding protein 41a	Chloroplast	Chloroplast	Nuclear	-0.96856	Donwregulated
Cre02.g103550.t1.2	Eukaryotic translation initiation factor 1A	Cytosol	Nuclear	Nuclear	-0.968382	Donwregulated
Cre12.g498900.t1.2	Cytosolic 80S ribosomal protein S7	Cytosol	Nuclear	Nuclear	-0.967814	Donwregulated
Cre12.g498600.t1.2	Eukaryotic translation elongation factor 1 alpha	Cytosol	Nuclear	Nuclear	-0.96453	Donwregulated
Cre12.g529400.t1.2	Cytosolic 80S ribosomal protein S27	Cytosol	Nuclear	Not Nuclear	-0.962548	Donwregulated
Cre12.g516200.t1.2	Ribosomal protein S5/Elongation Factor G/III/V family protein	Cytosol	Nuclear	Nuclear	-0.960663	Donwregulated
Cre06.g298650.t1.2	Eukaryotic initiation factor 4A	Cytosol	Secretory Pathway	Nuclear	-0.957168	Donwregulated
Cre02.g098450.t1.2	eIF2 gamma subunit	Cytosol	Nuclear	Nuclear	-0.956338	Donwregulated
Cre12.g535851.t1.1	Cytosolic 80S ribosomal protein L8	Cytosol	Chloroplast	Nuclear	-0.955078	Donwregulated
Cre06.g290950.t1.2	Cytosolic 80S ribosomal protein S5	Cytosol	Nuclear	Nuclear	-0.95369	Donwregulated
Cre12.g528750.t1.2	Cytosolic 80S ribosomal protein L12	Cytosol	Nuclear	Nuclear	-0.951761	Donwregulated
Cre02.g075700.t1.2	Cytosolic 80S ribosomal protein L19	Cytosol	Nuclear	Not Nuclear	-0.951164	Donwregulated
Cre09.g388200.t1.1	Cytosolic 80S ribosomal protein L10	Cytosol	Nuclear	Nuclear	-0.949813	Donwregulated
Cre06.g282500.t1.2	Cytosolic 80S ribosomal protein L23a	Cytosol	Nuclear	Nuclear	-0.947736	Donwregulated
Cre09.g400650.t1.2	Cytosolic 80S ribosomal protein S6	Cytosol	Nuclear	Not Nuclear	-0.944496	Donwregulated
Cre11.g480150.t1.2	Cytosolic 80S ribosomal protein S14	Cytosol	Nuclear	Nuclear	-0.943509	Donwregulated
Cre12.g537800.t1.2	Cytosolic 80S ribosomal protein L7	Cytosol	Nuclear	Not Nuclear	-0.941744	Donwregulated
Cre11.g467578.t1.1	large subunit ribosomal protein L28e (RP L28e)	Cytosol	Nuclear	Nuclear	-0.940711	Donwregulated
Cre01.g040000.t1.2	Cytosolic 80S ribosomal protein L26	Cytosol	Chloroplast	Nuclear	-0.936796	Donwregulated
Cre01.g040000.t1.2	Cytosolic 80S ribosomal protein L26	Cytosol	Chloroplast	Nuclear	-0.936796	Donwregulated
Cre10.g417700.t1.2	Cytosolic 80S ribosomal protein L3	Cytosol	Chloroplast	Nuclear	-0.936062	Donwregulated
Cre06.g273600.t1.2	Cytosolic 80S ribosomal protein S27a	Cytosol	Nuclear	Nuclear	-0.934131	Donwregulated
Cre06.g273600.t1.2	Cytosolic 80S ribosomal protein S27a	Cytosol	Nuclear	Nuclear	-0.934131	Donwregulated
Cre12.g484050.t1.2	Cytosolic 80S ribosomal protein L36	Cytosol	Nuclear	Nuclear	-0.933779	Donwregulated
Cre17.g724850.t1.2	ribosome assembly protein RRB1 (RRB1	Nuclear	Nuclear	Nuclear	-0.933402	Donwregulated
Cre14.g630100.t1.2	Cytosolic 80S ribosomal protein L12	Cytosol	Nuclear	Nuclear	-0.931897	Donwregulated
Cre14.g621450.t1.2	Cytosolic 80S ribosomal protein L5	Cytosol	Nuclear	Nuclear	-0.931536	Donwregulated
Cre07.g357850.t1.2	Cytosolic 80S ribosomal protein L22	Cytosol	Nuclear	Nuclear	-0.929881	Donwregulated
Cre12.g508200.t1.2	ribosomal RNA assembly protein (KRR1)	Nuclear	Nuclear	Not Nuclear	-0.929657	Donwregulated
Cre09.g397697.t1.1	Ribosomal protein L4	Cytosol	Nuclear	Nuclear	-0.927347	Donwregulated
Cre10.g420750.t1.2	Cytosolic 80S ribosomal protein L30	Cytosol	Nuclear	Nuclear	-0.927253	Donwregulated
Cre14.g617900.t1.2	Cytosolic 80S ribosomal protein L35	Cytosol	Nuclear	Nuclear	-0.927184	Donwregulated
Cre06.g272950.t1.1	Cytosolic 80S ribosomal protein S18	Cytosol	Nuclear	Nuclear	-0.925446	Donwregulated
Cre13.g568650.t1.2	Cytosolic 80S ribosomal protein S3a	Cytosol	Nuclear	Nuclear	-0.923013	Donwregulated
Cre12.g531550.t1.2	Eukaryotic translation initiation factor 2	Nuclear	Nuclear	Nuclear	-0.922235	Donwregulated
Cre12.g514500.t1.2	Cytosolic 80S ribosomal protein S11	Cytosol	Nuclear	Nuclear	-0.916376	Donwregulated
Cre06.g278175.t1.1	ribosomal RNA processing protein 9 ((RRP9))	Nuclear	Chloroplast	Nuclear	-0.91461	Donwregulated
Cre12.g494050.t1.2	Cytosolic 80S ribosomal protein L9	Cytosol	Nuclear	Nuclear	-0.91401	Donwregulated
Cre12.g494050.t1.2	Cytosolic 80S ribosomal protein L9	Cytosol	Nuclear	Nuclear	-0.91401	Donwregulated
Cre01.g047750.t1.2	Cytosolic 80S ribosomal protein L18a	Cytosol	Nuclear	Nuclear	-0.913695	Donwregulated
Cre02.g106600.t1.2	Cytosolic 80S ribosomal protein S19	Cytosol	Nuclear	Nuclear	-0.912872	Donwregulated
Cre02.g115200.t1.2	Cytosolic 80S ribosomal protein L27a	Cytosol	Nuclear	Nuclear	-0.910332	Donwregulated
Cre16.g659950.t1.1	Chloroplast Ribosomal Protein S5	Chloroplast	Chloroplast	Nuclear	-0.907753	Donwregulated
Cre12.g489153.t1.1	Cytosolic 80S ribosomal protein L31	Cytosol	Nuclear	Nuclear	-0.904769	Donwregulated
Cre12.g532550.t1.1	Cytosolic 80S ribosomal protein L13a	Cytosol	Nuclear	Nuclear	-0.902167	Donwregulated
Cre03.g199647.t1.1	Eukaryotic translation initiation factor 4A3	Nuclear	Nuclear	Nuclear	-0.900284	Donwregulated
Cre01.g011000.t1.2	Cytosolic 80S ribosomal protein L6	Cytosol	Nuclear	Nuclear	-0.899767	Donwregulated
Cre04.g211800.t1.2	Cytosolic 80S ribosomal protein L23	Nuclear,Cytosol	Nuclear	Nuclear	-0.897874	Donwregulated
Cre17.g701200.t2.1	Cytosolic 80S ribosomal protein L14	Cytosol	Nuclear	Nuclear	-0.897049	Donwregulated
Cre06.g272800.t1.2	Cytosolic 80S ribosomal protein S8	Nuclear,Cytosol	Nuclear	Not Nuclear	-0.893726	Donwregulated
Cre12.g529651.t1.1	Cytosolic 80S ribosomal protein L7a	Cytosol	Nuclear	Nuclear	-0.88369	Donwregulated
Transcripton factors
Phytozome ID	Phytozome Description	Suba	PredAlgo	NucPred	Fold Change	Expression
Cre09.g393728.t1.1	SET domain-containing protein 6 (SE TD6)	Chloroplast	Nuclear	Nuclear	-14.4387	Downregulated
Cre06.g261450.t1.2	High mobility group protein	Nuclear	Nuclear	Nuclear	1.0567	Upregulated
Cre13.g570050.t1.2	Histone H2B	Nuclear	Nuclear	Nuclear	1.01698	Upregulated
Cre16.g672300.t1.2	High mobility group protein	Nuclear	Chloroplast	Nuclear	1.01598	Upregulated
Cre06.g264750.t1.2	Histone H2A	Nuclear	Chloroplast	Nuclear	1.00707	Upregulated
Cre17.g702650.t1.1	High mobility group protein	Nuclear	Mitochondrion	Not Nuclear	1.00121	Upregulated
Cre01.g062172.t1.1	Histone H2B variant	Nuclear	Nuclear	Nuclear	-0.989093	Downregulated
Cre12.g520650.t1.2	Tubby-like protein	Cytosol	Nuclear	Not Nuclear	-0.982305	Downregulated
Cre10.g455600.t1.1	Origin recognition complex subunit 1	Nuclear	Chloroplast	Not Nuclear	-0.968204	Downregulated
Cre11.g482700.t1.2	HMG-box domain (HMG_box_2)		Chloroplast	Not Nuclear	-0.963536	Downregulated
Cre14.g620850.t1.2	Basic helix-loop-helix transcription factor	Nuclear	Mitochondrion	Not Nuclear	-0.957556	Downregulated
Cre03.g176651.t1.1	Histone H2A deubiquitinase	Nuclear	Nuclear	Nuclear	-0.945029	Downregulated
Cre12.g508150.t1.2	SNF2-related DNA	Nuclear	Nuclear	Not Nuclear	-0.931324	Downregulated
Cre06.g268600.t1.2	Nucleic acid binding protein	Nuclear	Nuclear	Nuclear	-0.931254	Downregulated
Cre10.g466250.t1.2	Putative Utp21 subunit of U3 snoRNP	Nuclear	Nuclear	Nuclear	-0.916102	Downregulated
Cre03.g197350.t1.2	pre-mRNA-splicing factor CDC5	Nuclear	Nuclear	Not Nuclear	-0.907681	Downregulated
Cre02.g115250.t1.1	Centriole proteome protein	Chloroplast	Nuclear	Nuclear	-0.902072	Downregulated
Cre10.g446900.t1.2	pleiotropic regulator 1 (PLRG1)	Nuclear	Nuclear	Nuclear	-0.891202	Downregulated
Cre02.g073650.t2.1	Spliceosome Component	Cytosol	Nuclear	Nuclear	-0.887443	Downregulated
Conserved domains
Phytozome ID	Phytozome Description	Suba	PredAlgo	NucPred	Fold Change	Expression
Cre01.g035000.t1.2	periodic tryptophan protein 1 (PWP1)	Nuclear	Nuclear	Nuclear	-15.2012	Downregulated
Cre11.g467500.t1.2	Plant family of unknown function (DUF810) (DUF810)	Golgi	Nuclear	Nuclear	1.03686	Upregulated
Cre11.g468359.t1.1	Pherophorin family protein		Secretory Pathway	Nuclear	1.03597	Upregulated
Cre09.g395325.t1.1	Eukaryotic protein of unknown function (DUF1764) (DUF1764)	Nuclear	Nuclear	Nuclear	-0.997333	Downregulated
Cre12.g513150.t1.2	mitochondrial intermembrane space protein involved in protein import.	Nuclear	Nuclear	Not Nuclear	-0.966767	Downregulated
Cre07.g351000.t1.1	Protein with WW and FF domains	Nuclear	Mitochondrion	Not Nuclear	-0.952517	Downregulated
Cre05.g234648.t1.1	PHD finger like domain containing protein 5A (PHF5A)	Cytosol	Nuclear	Nuclear	-0.948873	Downregulated
Cre03.g144967.t1.1	containing protein 3A/B (ATAD3A_B)	Mitochondrion	Mitochondrion	Not Nuclear	-0.940514	Downregulated
Cre04.g215350.t1.1	NET1 associated nuclear protein 1 (U3 small nucleolar RNA associated protein 17 (NAN1)	Nuclear	Nuclear	Nuclear	-0.927624	Downregulated
Cre12.g486050.t1.2	Zinc knuckle (zf CCHC) // WW domain (WW)	Nuclear	Nuclear	Nuclear	-0.926434	Downregulated
Cre06.g303500.t1.2	G patch domain and KOW motifs containing protein (GPKOW)	Nuclear	Nuclear	Nuclear	-0.922583	Downregulated
Cre01.g032250.t1.1	NF KAPPA B ACTIVATING PROTEIN	Nuclear	Chloroplast	Not Nuclear	-0.891895	Downregulated
Cre13.g607650.t1.1	EF HAND CALCIUM BINDING DOMAIN CONTAINING PROTEIN // SUBFAMILY NOT NAMED	Cytosol	Nuclear	Not Nuclear	-0.858738	Downregulated
Cre17.g701050.t1.2	CELL GROWTH REGULATING NUCLEOLAR PROTEIN	Nuclear	Nuclear	Not Nuclear	-0.855487	Downregulated
Cell mobility
Phytozome ID	Phytozome Description	Suba	PredAlgo	NucPred	Fold Change	Expression
Cre02.g091700.t1.2	Protofilament ribbon protein of flagellar microtubules	Mitochondrion	Nuclear	Nuclear	-16.5286	Downregulated
Cre16.g655750.t1.2	Tektin		Nuclear	Nuclear	-16.511	Downregulated
Cre12.g536100.t1.2	Flagellar Associated Protein 126		Nuclear	Nuclear	-15.9673	Downregulated
Cre10.g427300.t1.2	Radial Spoke Protein 2		Nuclear	Nuclear	-15.7897	Downregulated
Cre12.g528000.t1.2	Flagellar Associated Protein 303	Golgi	Mitochondrion	Nuclear	-15.7482	Downregulated
Cre01.g025450.t1.2	Nexin dynein regulatory complex 9		Nuclear	Nuclear	-15.416	Downregulated
Cre10.g465250.t1.2	Radial Spoke Protein 11		Nuclear	Nuclear	-15.2667	Downregulated
Cre16.g654300.t1.2	Radial Spoke Protein 23	extracellular	Nuclear	Nuclear	-15.1878	Downregulated
Cre12.g556250.t1.2	Septin like protein		Nuclear	Nuclear	-15.1252	Downregulated
Cre09.g398650.t1.2	CACTIN	Nuclear	Nuclear	Not Nuclear	-0.990657	Downregulated
Cre13.g603700.t1.2	Actin	Cytosol	Nuclear	Nuclear	-0.990626	Downregulated
Cre01.g010400.t1.2	Flagellar Associated Membrane Protein 380	extracellular	Secretory Pathway	Nuclear	-0.97014	Downregulated
Cre12.g549750.t1.2	Flagellar Associated Protein 4	Nuclear,Cytosol	Nuclear	Nuclear	-0.953684	Downregulated
Cre02.g081050.t1.2	Flagellar Associated Protein 24	extracellular	Secretory Pathway	Nuclear	-0.949687	Downregulated
Cre12.g547651.t4.1	Actin filament coating protein tropomyosin // mitotic checkpoint MAD1		Mitochondrion	Not Nuclear	-0.944648	Downregulated
Cre09.g394200.t1.1	Flagellar Associated Protein 102		Secretory Pathway	Nuclear	-0.940172	Downregulated
Cre07.g325736.t1.1	PAP_fibrillin (PAP_fibrillin)	Chloroplast	Chloroplast	Nuclear	-0.933682	Downregulated
Cre17.g703600.t2.1	Basal body protein		Nuclear	Not Nuclear	-0.929928	Downregulated
Cre10.g461350.t1.1	Basal body protein		Nuclear	Not Nuclear	-0.92642	Downregulated
Cre07.g332950.t1.2	SF assemblin	Nuclear	Chloroplast	Not Nuclear	-0.921592	Downregulated
Cre02.g141350.t1.2	Nexin dynein regulatory complex 10		Nuclear	Not Nuclear	-0.869019	Downregulated
Splicing
Phytozome ID	Phytozome Description	Suba	PredAlgo	NucPred	Fold Change	Expression
Cre12.g513500.t1.2	Transcription coupled DNA repair protein	Nuclear	Nuclear	Nuclear	-16.8074	Downregulated
Cre12.g503400.t1.2	Pre mRNA splicing factor	Nuclear	Nuclear	Not Nuclear	-0.994858	Downregulated
Cre01.g038650.t1.2	Serine/arginine rich pre mRNA splicing factor	Nuclear	Chloroplast	Not Nuclear	-0.946032	Downregulated
Cre13.g602850.t1.1	Serine/arginine rich pre mRNA splicing factor	Mitochondrion	Chloroplast	Not Nuclear	-0.944879	Downregulated
Cre13.g586916.t1.1	Serine/arginine rich pre mRNA splicing factor	Nuclear	Nuclear	Not Nuclear	-0.937209	Downregulated
Cre03.g164950.t1.1	Serine/arginine rich pre mRNA splicing factor	Nuclear	Chloroplast	Not Nuclear	-0.927869	Downregulated
Cre17.g697350.t1.2	pre mRNA splicing factor SPF27 (BCAS2)	Nuclear	Nuclear	Nuclear	-0.91834	Downregulated
Cre17.g744147.t1.1	pre mRNA splicing helicase BRR2 (SNRNP200)	Nuclear	Nuclear	Nuclear	-0.91826	Downregulated
Cre01.g003487.t1.1	pre mRNA splicing factor CWC26 (BUD13)	Nuclear	Nuclear	Not Nuclear	-0.91647	Downregulated
Cre04.g226450.t1.1	Nuclear pre mRNA splicing factor	Nuclear	Nuclear	Nuclear	-0.909808	Downregulated
Cre08.g372800.t1.1	Nuclear pre mRNA splicing factor involved in polyadenylation	Nuclear	Nuclear	Nuclear	-0.907742	Downregulated
Cre06.g255400.t1.2	Prp8 binding protein (SNRNP40	Nuclear	Nuclear	Nuclear	-0.905212	Downregulated
Cre14.g621000.t1.2	Pre mRNA splicing factor	Nuclear	Nuclear	Not Nuclear	-0.897252	Downregulated
Cre10.g427150.t1.2	Pre mRNA splicing factor	Nuclear	Nuclear	Nuclear	-0.886482	Downregulated
Cre06.g259800.t1.2	Cwc22 pre mRNA splicing factor	Nuclear	Chloroplast	Not Nuclear	-0.868846	Downregulated
Cre01.g026450.t1.2	Serine/arginine rich pre mRNA splicing factor	Nuclear	Nuclear	Nuclear	-0.86296	Downregulated
Cre02.g075650.t1.2	pre mRNA splicing factor RBM22/SLT11 (RBM22)	Nuclear	Nuclear	Nuclear	-0.847391	Downregulated
Cre01.g016050.t1.2	Splicing factor	Nuclear	Nuclear	Not Nuclear	-0.828652	Downregulated
Cre06.g278239.t2.1	Serine/arginine rich pre mRNA splicing factor	Nuclear	Nuclear	Nuclear	-0.815501	Downregulated
cellular nitrogen compound metabolic process
Phytozome ID	Phytozome Description	Suba	PredAlgo	NucPred	Fold Change	Expression
Cre10.g428750.t1.1	rRNA biogenesis protein RRP5 (RRP5	Nuclear	Nuclear	Nuclear	1.02504	Upregulated
Cre17.g698000.t1.2	Mitochondrial F1F0 ATP synthase	Mitochondrion	Mitochondrion	Nuclear	1.01154	Upregulated
Cre05.g234550.t2.1	Fructose-bisphosphate aldolase	Chloroplast	Chloroplast	Nuclear	-0.987957	Downregulated
Cre12.g533000.t1.2	CPD photolyase	Mitochondrion	Nuclear	Nuclear	-0.981143	Downregulated
Cre04.g221650.t1.1	Topoisomerase type IV	Chloroplast	Chloroplast	Nuclear	-0.980003	Downregulated
Cre12.g490000.t1.2	Eukaryotic translation initiation factor 2 subunit 1	Cytosol	Nuclear	Nuclear	-0.974605	Downregulated
Cre02.g116750.t2.1	Mitochondrial F1F0 ATP synthase	Mitochondrion,Chloroplast	Mitochondrion	Nuclear	-0.972946	Downregulated
Cre11.g467770.t1.1	Phosphoglycerate kinase	Chloroplast	Chloroplast	Nuclear	-0.969722	Downregulated
Cre01.g070567.t1.1	RNA polymerase I 49 kDa subunit	Nuclear	Nuclear	Nuclear	-0.969355	Downregulated
Cre01.g009250.t1.1	DNA topoisomerase II	Nuclear	Nuclear	Not Nuclear	-0.963752	Downregulated
Cre01.g018000.t1.1	DNA directed RNA polymerase I subunit A12.2	Nuclear	Nuclear	Nuclear	-0.961504	Downregulated
Cre12.g529600.t1.2	DNA directed RNA polymerase I subunit 1	Nuclear	Nuclear	Nuclear	-0.955458	Downregulated
Cre06.g262900.t1.2	Phosphofructokinase	Chloroplast	Chloroplast	Nuclear	-0.951023	Downregulated
Cre06.g269950.t1.2	Cell Division Cycle protein 48	Cytosol	Nuclear	Not Nuclear	-0.941542	Downregulated
Cre06.g251600.t1.2	Eukaryotic translation initiation factor 5	Cytosol	Nuclear	Nuclear	-0.937821	Downregulated
Cre12.g553250.t1.2	Phosphofructokinase	Chloroplast	Chloroplast	Nuclear	-0.937469	Downregulated
Cre07.g322176.t1.1	DNA directed RNA polymerase I subunit RPA2 (RPA2	Nuclear	Nuclear	Nuclear	-0.928973	Downregulated
Cre16.g678050.t1.1	serine/arginine repetitive matrix protein	Nuclear	Nuclear	Not Nuclear	-0.918673	Downregulated
Cre03.g172950.t1.2	TruB family RNA pseudouridine synthase	Nuclear	Nuclear	Nuclear	-0.915942	Downregulated
Cre12.g529500.t1.2	Putative ribosomal RNA methyltransferase	Nuclear	Nuclear	Not Nuclear	-0.91593	Downregulated
Cre08.g378850.t1.2	Ribose phosphate pyrophosphokinase	Chloroplast	Chloroplast	Nuclear	-0.910446	Downregulated
Cre01.g051100.t1.2	SNW domain containing protein 1 (SNW1	Nuclear	Nuclear	Not Nuclear	-0.895035	Downregulated
Cre07.g313302.t1.1	DNA directed RNA polymerases I and III subunit RPAC1 (RPC40	Nuclear	Nuclear	Nuclear	-0.892993	Downregulated
Cre08.g375084.t2.1	RNA binding protein 25 (RBM25	Nuclear	Nuclear	Not Nuclear	-0.889137	Downregulated
Cre06.g300750.t1.1	intron binding protein aquarius (AQR)	Cytosol	Nuclear	Nuclear	-0.868191	Downregulated
Cre12.g515850.t1.2	Proliferating cell nuclear antigen homolog	Nuclear	Nuclear	Nuclear	-0.844353	Downregulated
Process metabolic cellular
Phytozome ID	Phytozome Description	Suba	PredAlgo	NucPred	Fold Change	Expression
Cre06.g282800.t1.2	Isocitrate lyase	Peroxisome	Nuclear	Nuclear	-15.574	Downregulated
Cre06.g257601.t1.2	2 cys Peroxiredoxin	Chloroplast	Chloroplast	Nuclear	-15.1682	Downregulated
Cre08.g370650.t1.2	6 phosphogluconolactonase	Cytosol	Chloroplast	Nuclear	-0.998857	Downregulated
Cre07.g337650.t1.2	Mitochondrial pyruvate dehydrogenase complex	Mitochondrion	Mitochondrion	Nuclear	-0.994806	Downregulated
Cre05.g237450.t1.2	Plastid specific ribosomal protein 1	Chloroplast	Chloroplast	Nuclear	-0.987545	Downregulated
Cre03.g158900.t1.2	dihydrolipoamide acetyltransferase	Chloroplast	Chloroplast	Nuclear	-0.986123	Downregulated
Cre02.g114600.t1.2	2 cys Peroxiredoxin	Chloroplast	Nuclear	Nuclear	-0.978816	Downregulated
Cre05.g248450.t1.2	Mitochondrial carbonic anhydrase	Cytosol	Mitochondrion	Nuclear	-0.970556	Downregulated
Cre03.g180750.t1.2	Cobalamin dependent methionine synthase	Mitochondrion	Nuclear	Nuclear	-0.963098	Downregulated
Cre10.g417950.t1.2	ribosome biogenesis protein ERB1 (ERB1	Nuclear	Nuclear	Nuclear	-0.960128	Downregulated
Cre01.g010900.t1.2	Glyceraldehyde Phosphate Dehydrogenase	Chloroplast	Chloroplast	Nuclear	-0.945159	Downregulated
Cre13.g567450.t1.2	Histone H1	Nuclear	Nuclear	Nuclear	-0.938746	Downregulated
Cre16.g664550.t1.2	Serine hydroxymethyltransferase	Mitochondrion	Mitochondrion	Nuclear	-0.932599	Downregulated
Cre01.g020950.t1.2	regulator of ribosome biosynthesis (RRS1)	Nuclear	Nuclear	Not Nuclear	-0.930316	Downregulated
Cre06.g273413.t1.1	ribosomal RNA methyltransferase Nop2 (NOP2)	Nuclear	Chloroplast	Nuclear	-0.930078	Downregulated
Cre12.g531400.t1.1	Nephrocystin 4		Mitochondrion	Not Nuclear	-0.925229	Downregulated
Cre01.g044800.t1.2	Pyruvate formate lyase		Chloroplast	Nuclear	-0.924293	Downregulated
Cre10.g445600.t1.1	ribosome biogenesis protein BMS1 (BMS1)	Nuclear	Nuclear	Not Nuclear	-0.917981	Downregulated
Cre06.g250200.t1.2	S adenosylmethionine synthase	Cytosol	Nuclear	Nuclear	-0.91646	Downregulated
Cre06.g278254.t1.1	serine/threonine protein kinase SRPK3 [EC:2.7.11.1] (SRPK3	Nuclear	Chloroplast	Nuclear	-0.91448	Downregulated
Cre12.g520500.t1.1	Acidic ribosomal protein P0	Cytosol	Nuclear	Nuclear	-0.910409	Downregulated
Cre16.g683793.t1.1	pescadillo (PES1	Nuclear	Nuclear	Nuclear	-0.895921	Downregulated
Cre12.g549550.t1.2	beta 2 tubulin	Cytosol	Nuclear	Nuclear	-0.895463	Downregulated
Cre06.g275900.t1.2	Histone H1	Nuclear	Nuclear	Nuclear	-0.895312	Downregulated
Cre07.g338451.t1.1	Fructose-1,6-bisphosphatase		Nuclear	Nuclear	-0.895132	Downregulated
Cre03.g149100.t1.2	Citrate synthase	Peroxisome	Mitochondrion	Nuclear	-0.888144	Downregulated
Cre06.g288750.t1.2	Nuclear RNA cap binding protein	Nuclear	Nuclear	Nuclear	-0.875286	Downregulated
Cre04.g216850.t1.2	Alpha tubulin 2	Cytosol	Nuclear	Nuclear	-0.843132	Downregulated
photosynthesis
Phytozome ID	Phytozome Description	Suba	PredAlgo	NucPred	Fold Change	Expression
Cre09.g412100.t1.2	Cre09.g412100.t1.2	Photosystem I reaction center subunit III	Chloroplast	Nuclear	-0.963906	Downregulated
Cre08.g372450.t1.2	Cre08.g372450.t1.2	Photosystem II Oxygen Evolution Enhancer protein 3	Chloroplast	Nuclear	-0.875896	Downregulated
Cre09.g396213.t1.1	Cre09.g396213.t1.1	Photosystem II Oxygen Evolution Enhancer protein 1	Chloroplast	Nuclear	-0.987104	Downregulated
RNA binding/RNA metabolism
Phytozome ID	Phytozome Description	Suba	PredAlgo	NucPred	Fold Change	Expression
Cre12.g528950.t1.1	Puf protein	Nuclear,Cytosol	Nuclear	Nuclear	-16.1748	Downregulated
Cre04.g213905.t2.1	RNA binding protein 39 (RBM39)	Nuclear	Nuclear	Not Nuclear	-15.4777	Downregulated
Cre07.g349100.t1.1	ATP dependent RNA helicase	Nuclear	Secretory Pathway	Not Nuclear	-15.2364	Downregulated
Cre09.g401600.t1.2	Alba (Alba)	Cytosol	Nuclear	Nuclear	-0.991607	Downregulated
Cre10.g420900.t1.2	DEAD/DEAH box helicase	Nuclear	Nuclear	Not Nuclear	-0.946348	Downregulated
Cre12.g539100.t1.1	DEAD box RNA helicase	Nuclear	Nuclear	Nuclear	-0.934699	Downregulated
Cre01.g022350.t1.2	DEAH box ATP dependent RNA helicase	Nuclear	Chloroplast	Not Nuclear	-0.932742	Downregulated
Cre02.g118300.t1.2	DEAD box ATP dependent RNA helicase	Nuclear	Nuclear	Nuclear	-0.932429	Downregulated
Cre09.g392350.t2.1	glycine rich RNA binding protein	Mitochondrion	Nuclear	Nuclear	-0.931535	Downregulated
Cre01.g032300.t1.2	G strand telomere binding protein	Cytosol	Nuclear	Nuclear	-0.930818	Downregulated
Cre16.g672750.t1.2	RNA binding protein Nova (NOVA)	Nuclear	Nuclear	Nuclear	-0.930748	Downregulated
Cre03.g156150.t1.1	DEAD/DEAH box helicase	Nuclear	Nuclear	Not Nuclear	-0.926304	Downregulated
Cre09.g409200.t1.2	putative RNA binding protein	Nuclear	Nuclear	Not Nuclear	-0.926241	Downregulated
Cre01.g021600.t1.2	DEAD box RNA helicase	Nuclear	Nuclear	Nuclear	-0.914511	Downregulated
Cre10.g439700.t1.2	conserved expressed putative RNA binding protein	Nuclear	Nuclear	Not Nuclear	-0.912066	Downregulated
Cre17.g727700.t1.1	DEAD box ATP dependent RNA helicase	Chloroplast	Chloroplast	Nuclear	-0.887935	Downregulated
Cre10.g427700.t1.2	DEAD box ATP dependent RNA helicase	Nuclear	Nuclear	Nuclear	-0.885053	Downregulated
Ribosome biogenesis
Phytozome ID	Phytozome Description	Suba	PredAlgo	NucPred	Fold Change	Expression
Cre10.g450879.t1.2	ribosome biogenesis protein SSF1/2 (SSF1_2)	Nuclear	Nuclear	Not Nuclear	-16.726	Downregulated
Cre02.g143050.t1.2	Acidic ribosomal protein P2	Plasma Membrane	Nuclear	Nuclear	-0.947363	Downregulated
Cre02.g095400.t2.1	ribosome biogenesis protein BRX1 (BRX1	Nuclear	Chloroplast	Nuclear	-0.915523	Downregulated
Cre17.g718650.t1.2	ribosome biogenesis protein NSA1 (NSA10)	Nuclear	Nuclear	Nuclear	-0.901739	Downregulated
Cre01.g036600.t1.2	Exoribonuclease II	Nuclear	Nuclear	Nuclear	-0.883391	Downregulated
Cre07.g314100.t1.2	ribosome biogenesis protein UTP30 (UTP30	Nuclear,Cytosol	Nuclear	Nuclear	-0.859054	Downregulated
Nucleic acid binding
Phytozome ID	Phytozome Description	Suba	PredAlgo	NucPred	Fold Change	Expression
Cre06.g269050.t1.2	possible chloroplast protein translocon component Tic62	Chloroplast	Chloroplast	Nuclear	-0.941947	Downregulated
Cre01.g048150.t1.2	Transcriptional co activator/nuclease induced by high light	Cytosol	Chloroplast	Nuclear	-0.936435	Downregulated
Cre06.g278128.t1.1	CYTOSINE SPECIFIC METHYLTRANSFERASE		Nuclear	Nuclear	-0.898992	Downregulated
Cre03.g192850.t1.2	tRNA(Met) cytidine acetyltransferase	Nuclear	Nuclear	Not Nuclear	-0.941605	Downregulated
Cre02.g084750.t2.1	FAMILY NOT NAMED // TRNA SELENOCYSTEINE 1 ASSOCIATED PROTEIN 1	Mitochondrion	Nuclear	Nuclear	-0.922794	Downregulated
Histones/Chaperones
Phytozome ID	Phytozome Description	Suba	PredAlgo	NucPred	Fold Change	Expression
Cre16.g661450.t1.2	Histone H3 variant	Nuclear	Chloroplast	Not Nuclear	1.0073	Upregugulated
Cre12.g539750.t1.2	Histone chaperone domain CHZ (CHZ)	Nuclear	Nuclear	Not Nuclear	-0.951966	Downregulated
Cre09.g389550.t1.1	DnaJ like protein	Nuclear	Nuclear	Not Nuclear	-0.919774	Downregulated
Cre06.g285401.t1.1	Histone like Flagellar Associated protein		Chloroplast	Nuclear	-0.957511	Downregulated
Cre06.g264650.t1.2	Histone H3	Nuclear	Chloroplast	Nuclear	-0.942152	Downregulated
Cre06.g250100.t1.2	Heat shock protein 70B	Chloroplast	Chloroplast	Nuclear	-0.920109	Downregulated
Cre17.g701500.t1.2	DnaJ like protein	Cytosol	Nuclear	Nuclear	-0.953777	Downregulated
Cre08.g372100.t1.2	Heat shock protein 70A	Cytosol	Nuclear	Nuclear	-0.95098	Downregulated
Cre06.g264600.t1.2	Histone H4	Nuclear	Nuclear	Nuclear	-0.984798	Downregulated
Cre13.g567700.t1.2	Histone H2A variant	Nuclear	Nuclear	Nuclear	-0.951201	Downregulated
Cre11.g469600.t1.2	Histone deacetylase	Nuclear	Nuclear	Nuclear	-0.920884	Downregulated
Cre02.g080700.t1.2	Endoplasmic reticulum associated Hsp70 protein	endoplasmic reticulum	Secretory Pathway	Nuclear	-0.990133	Downregulated
Lipid biosynthesis
Phytozome ID	Phytozome Description	Suba	PredAlgo	NucPred	Fold Change	Expression
Cre14.g633400.t1.1	Putative phospholipid/glycerol acyltransferase	Nuclear	Nuclear	Not Nuclear	-0.978445	Downregulated
Cre07.g325450.t1.1	Predicted steroid reductase	Plasma Membrane	Nuclear	Nuclear	-0.958795	Downregulated
Starch Metabolism
Phytozome ID	Phytozome Description	Suba	PredAlgo	NucPred	Fold Chnage	Expression
Cre12.g492750.t1.1	Alpha amylase / Glycogenase	Cytosol	Chloroplast	Not Nuclear	1.02734	Upregugulated
Cre17.g721500.t1.2	Granule bound starch synthase I	Chloroplast	Chloroplast	Nuclear	-0.991455	Downregulated
Cre09.g394510.t1.1	Starch binding domain (CBM_20)	Cytosol	Chloroplast	Nuclear	-0.986183	Downregulated
signalling
Phytozome ID	Phytozome Description	Suba	PredAlgo	NucPred	Fold Change	Expression
Cre05.g245950.t1.1	Dynamin related GTPase	Cytosol	Nuclear	Nuclear	1.0522	Upregugulated
Transporters
Phytozome ID	Phytozome Description	Suba	PredAlgo	NucPred	Fold Change	Expression
Cre09.g386650.t2.1	ADP/ATP carrier protein	Mitochondrion	Nuclear	Nuclear	-0.955358	Downregulated
Cre16.g672650.t1.2	Mitochondrial substrate carrier protein	Mitochondrion	Nuclear	Nuclear	-0.971619	Downregulated
Cre01.g034950.t1.2	ATP binding cassette	Nuclear	Nuclear	Not Nuclear	-0.911277	Downregulated
Redutase
Phytozome ID	Phytozome Description	Suba	PredAlgo	NucPred	Fold Change	Expression
Cre17.g731850.t1.2	Short chain dehydrogenase/reductase	Peroxisome	Mitochondrion	Nuclear	-0.884253	Donwregulated
Activator/Repressor
Phytozome ID	Phytozome Description	Suba	PredAlgo	NucPred	Fold Change	Expression
Cre09.g404400.t1.2	Sin3 complex component	Nuclear	Nuclear	Nuclear	-16.2348	Donwregulated
