# Supplementary material for: Characterization of the Nuclear Proteome of Chlamydomonas in Response to Salt Stress
Source: Preprints.org preprint supplement (doi:10.20944/preprints202206.0016.v1), 2022-06-01
Supplement: Supplementary file 3 [file TableS2_Chlamydomonas_TFs Targets_v1.xlsx]

## Sheet: Targets evalue ≤10
Table S2. C. reinhardtii targets for the Transcription Factors and Transcriptional Regulators homologs identified in A. thaliana
Columns indicate: Transcription factor ID, Target ID, hit e-value
Transcription Factor	Target	Hit e-value
Cre03.g152150.t1.2	Cre09.g396800	0.35
Cre03.g152150.t1.2	Cre02.g142987	0.57
Cre03.g152150.t1.2	Cre45.g760847	0.76
Cre03.g152150.t1.2	Cre16.g686510	2.8
Cre03.g152150.t1.2	Cre09.g399050	5.8
Cre03.g152150.t1.2	Cre03.g153050	6.3
Cre03.g152150.t1.2	Cre26.g756597	6.5
Cre03.g152150.t1.2	Cre13.g562150	7
Cre03.g152150.t1.2	Cre12.g487400	7.6
Cre03.g152150.t1.2	Cre12.g487450	7.6
Cre03.g152150.t1.2	Cre09.g397919	7.8
Cre03.g152150.t1.2	Cre02.g143300	8.4
Cre03.g152150.t1.2	Cre13.g584850	8.7
Cre03.g152150.t1.2	Cre12.g500450	8.7
Cre03.g152150.t1.2	Cre12.g500500	8.7
Cre03.g176651.t1.1	Cre08.g377100	0.041
Cre03.g176651.t1.1	Cre08.g377150	0.041
Cre03.g176651.t1.1	Cre05.g244200	0.048
Cre03.g176651.t1.1	Cre09.g387500	0.13
Cre03.g176651.t1.1	Cre06.g307900	0.51
Cre03.g176651.t1.1	Cre06.g307850	0.51
Cre03.g176651.t1.1	Cre14.g632759	0.55
Cre03.g176651.t1.1	Cre14.g632767	0.55
Cre03.g176651.t1.1	Cre11.g467650	0.55
Cre03.g176651.t1.1	Cre09.g386747	0.59
Cre03.g176651.t1.1	Cre07.g336200	0.67
Cre03.g176651.t1.1	Cre09.g392105	1.1
Cre03.g176651.t1.1	Cre09.g392106	1.1
Cre03.g176651.t1.1	Cre02.g094050	1.3
Cre03.g176651.t1.1	Cre01.g036300	1.3
Cre03.g176651.t1.1	Cre02.g079351	1.4
Cre03.g176651.t1.1	Cre05.g243353	1.6
Cre03.g176651.t1.1	Cre15.g641000	1.9
Cre03.g176651.t1.1	Cre15.g639504	1.9
Cre03.g176651.t1.1	Cre04.g218650	2.4
Cre03.g176651.t1.1	Cre16.g665850	2.6
Cre03.g176651.t1.1	Cre12.g491500	3.3
Cre03.g176651.t1.1	Cre12.g491450	3.3
Cre03.g176651.t1.1	Cre12.g553253	3.6
Cre03.g176651.t1.1	Cre12.g552827	3.6
Cre03.g176651.t1.1	Cre10.g426500	3.9
Cre03.g176651.t1.1	Cre01.g035400	4
Cre03.g176651.t1.1	Cre06.g249500	4.3
Cre03.g176651.t1.1	Cre17.g747197	5
Cre03.g176651.t1.1	Cre17.g747147	5
Cre03.g176651.t1.1	Cre04.g224300	5.1
Cre03.g176651.t1.1	Cre21.g752847	5.4
Cre03.g176651.t1.1	Cre17.g719550	5.9
Cre03.g176651.t1.1	Cre17.g719600	5.9
Cre03.g176651.t1.1	Cre06.g269300	7.5
Cre03.g176651.t1.1	Cre06.g269250	7.5
Cre03.g176651.t1.1	Cre16.g672400	8
Cre03.g176651.t1.1	Cre12.g531600	8.1
Cre03.g176651.t1.1	Cre12.g542150	8.1
Cre03.g176651.t1.1	Cre12.g542200	8.1
Cre03.g176651.t1.1	Cre16.g686550	9.3
Cre03.g176651.t1.1	Cre16.g686600	9.3
Cre03.g176651.t1.1	Cre03.g182900	9.5
Cre03.g176651.t1.1	Cre03.g182850	9.5
Cre03.g176651.t1.1	Cre16.g656851	9.7
Cre03.g176651.t1.1	Cre01.g030700	9.8
Cre03.g176651.t1.1	Cre01.g030650	9.8
Cre03.g197350.t1.2	Cre06.g250000	0.00055
Cre03.g197350.t1.2	Cre08.g358527	0.00066
Cre03.g197350.t1.2	Cre01.g011300	0.00097
Cre03.g197350.t1.2	Cre06.g274950	0.002
Cre03.g197350.t1.2	Cre03.g178400	0.0024
Cre03.g197350.t1.2	Cre09.g397250	0.0063
Cre03.g197350.t1.2	Cre17.g725900	0.0064
Cre03.g197350.t1.2	Cre17.g725950	0.0064
Cre03.g197350.t1.2	Cre11.g467743	0.0067
Cre03.g197350.t1.2	Cre05.g240350	0.015
Cre03.g197350.t1.2	Cre05.g240300	0.015
Cre03.g197350.t1.2	Cre08.g369740	0.02
Cre03.g197350.t1.2	Cre08.g369800	0.02
Cre03.g197350.t1.2	Cre08.g381800	0.02
Cre03.g197350.t1.2	Cre06.g258250	0.024
Cre03.g197350.t1.2	Cre08.g363267	0.026
Cre03.g197350.t1.2	Cre08.g363283	0.026
Cre03.g197350.t1.2	Cre16.g679221	0.033
Cre03.g197350.t1.2	Cre16.g667300	0.033
Cre03.g197350.t1.2	Cre09.g398554	0.033
Cre03.g197350.t1.2	Cre09.g398555	0.033
Cre03.g197350.t1.2	Cre06.g302900	0.033
Cre03.g197350.t1.2	Cre06.g302950	0.033
Cre03.g197350.t1.2	Cre03.g145307	0.033
Cre03.g197350.t1.2	Cre03.g145287	0.033
Cre03.g197350.t1.2	Cre12.g533500	0.033
Cre03.g197350.t1.2	Cre11.g467611	0.04
Cre03.g197350.t1.2	Cre03.g208161	0.049
Cre03.g197350.t1.2	Cre03.g199983	0.05
Cre03.g197350.t1.2	Cre03.g200095	0.05
Cre03.g197350.t1.2	Cre17.g747497	0.06
Cre03.g197350.t1.2	Cre02.g105500	0.062
Cre03.g197350.t1.2	Cre11.g467785	0.072
Cre03.g197350.t1.2	Cre16.g677877	0.077
Cre03.g197350.t1.2	Cre16.g677989	0.077
Cre03.g197350.t1.2	Cre08.g360100	0.095
Cre03.g197350.t1.2	Cre08.g360050	0.095
Cre03.g197350.t1.2	Cre06.g290150	0.1
Cre03.g197350.t1.2	Cre06.g290100	0.1
Cre03.g197350.t1.2	Cre09.g404450	0.1
Cre03.g197350.t1.2	Cre04.g219500	0.1
Cre03.g197350.t1.2	Cre03.g195100	0.11
Cre03.g197350.t1.2	Cre13.g569801	0.12
Cre03.g197350.t1.2	Cre11.g468650	0.12
Cre03.g197350.t1.2	Cre06.g261600	0.14
Cre03.g197350.t1.2	Cre08.g358525	0.15
Cre03.g197350.t1.2	Cre06.g254850	0.15
Cre03.g197350.t1.2	Cre06.g254917	0.15
Cre03.g197350.t1.2	Cre02.g143801	0.15
Cre03.g197350.t1.2	Cre02.g102050	0.15
Cre03.g197350.t1.2	Cre10.g465226	0.15
Cre03.g197350.t1.2	Cre12.g517750	0.15
Cre03.g197350.t1.2	Cre11.g467538	0.15
Cre03.g197350.t1.2	Cre14.g624650	0.15
Cre03.g197350.t1.2	Cre14.g624700	0.15
Cre03.g197350.t1.2	Cre07.g317908	0.16
Cre03.g197350.t1.2	Cre03.g200767	0.19
Cre03.g197350.t1.2	Cre11.g475500	0.21
Cre03.g197350.t1.2	Cre13.g605850	0.23
Cre03.g197350.t1.2	Cre13.g605900	0.23
Cre03.g197350.t1.2	Cre14.g625300	0.25
Cre03.g197350.t1.2	Cre14.g629050	0.3
Cre03.g197350.t1.2	Cre16.g691888	0.3
Cre03.g197350.t1.2	Cre05.g241640	0.3
Cre03.g197350.t1.2	Cre05.g241641	0.3
Cre03.g197350.t1.2	Cre01.g023600	0.3
Cre03.g197350.t1.2	Cre02.g119600	0.3
Cre03.g197350.t1.2	Cre06.g272000	0.31
Cre03.g197350.t1.2	Cre14.g621100	0.31
Cre03.g197350.t1.2	Cre07.g325746	0.39
Cre03.g197350.t1.2	Cre07.g325745	0.39
Cre03.g197350.t1.2	Cre01.g018184	0.4
Cre03.g197350.t1.2	Cre17.g698600	0.44
Cre03.g197350.t1.2	Cre12.g543300	0.45
Cre03.g197350.t1.2	Cre12.g543350	0.45
Cre03.g197350.t1.2	Cre08.g373100	0.47
Cre03.g197350.t1.2	Cre01.g025850	0.47
Cre03.g197350.t1.2	Cre08.g363300	0.47
Cre03.g197350.t1.2	Cre08.g363350	0.47
Cre03.g197350.t1.2	Cre13.g569550	0.5
Cre03.g197350.t1.2	Cre14.g617650	0.53
Cre03.g197350.t1.2	Cre01.g041200	0.56
Cre03.g197350.t1.2	Cre10.g465500	0.59
Cre03.g197350.t1.2	Cre03.g176200	0.59
Cre03.g197350.t1.2	Cre03.g176250	0.59
Cre03.g197350.t1.2	Cre16.g673400	0.6
Cre03.g197350.t1.2	Cre09.g386734	0.65
Cre03.g197350.t1.2	Cre03.g208306	0.66
Cre03.g197350.t1.2	Cre09.g395000	0.68
Cre03.g197350.t1.2	Cre09.g395050	0.68
Cre03.g197350.t1.2	Cre08.g376300	0.68
Cre03.g197350.t1.2	Cre10.g461950	0.71
Cre03.g197350.t1.2	Cre10.g462000	0.71
Cre03.g197350.t1.2	Cre05.g234640	0.72
Cre03.g197350.t1.2	Cre05.g234641	0.72
Cre03.g197350.t1.2	Cre04.g225600	0.73
Cre03.g197350.t1.2	Cre06.g300001	0.77
Cre03.g197350.t1.2	Cre07.g324600	0.79
Cre03.g197350.t1.2	Cre07.g324550	0.79
Cre03.g197350.t1.2	Cre08.g358200	0.8
Cre03.g197350.t1.2	Cre02.g146400	0.81
Cre03.g197350.t1.2	Cre06.g311650	0.83
Cre03.g197350.t1.2	Cre03.g143807	0.83
Cre03.g197350.t1.2	Cre01.g042300	0.83
Cre03.g197350.t1.2	Cre04.g226138	0.83
Cre03.g197350.t1.2	Cre08.g378100	0.87
Cre03.g197350.t1.2	Cre02.g091600	0.94
Cre03.g197350.t1.2	Cre02.g076000	1
Cre03.g197350.t1.2	Cre08.g363250	1
Cre03.g197350.t1.2	Cre11.g476700	1
Cre03.g197350.t1.2	Cre02.g088551	1
Cre03.g197350.t1.2	Cre01.g055500	1
Cre03.g197350.t1.2	Cre02.g094250	1
Cre03.g197350.t1.2	Cre16.g676000	1
Cre03.g197350.t1.2	Cre16.g676050	1
Cre03.g197350.t1.2	Cre07.g348500	1.1
Cre03.g197350.t1.2	Cre07.g348450	1.1
Cre03.g197350.t1.2	Cre09.g402350	1.1
Cre03.g197350.t1.2	Cre09.g402300	1.1
Cre03.g197350.t1.2	Cre14.g624201	1.1
Cre03.g197350.t1.2	Cre07.g355050	1.2
Cre03.g197350.t1.2	Cre07.g354976	1.2
Cre03.g197350.t1.2	Cre07.g351400	1.3
Cre03.g197350.t1.2	Cre17.g699150	1.3
Cre03.g197350.t1.2	Cre01.g020223	1.3
Cre03.g197350.t1.2	Cre01.g020264	1.3
Cre03.g197350.t1.2	Cre10.g433866	1.3
Cre03.g197350.t1.2	Cre10.g433850	1.3
Cre03.g197350.t1.2	Cre08.g358541	1.4
Cre03.g197350.t1.2	Cre02.g142000	1.4
Cre03.g197350.t1.2	Cre02.g141950	1.4
Cre03.g197350.t1.2	Cre08.g364050	1.4
Cre03.g197350.t1.2	Cre11.g468374	1.4
Cre03.g197350.t1.2	Cre11.g468377	1.4
Cre03.g197350.t1.2	Cre06.g262400	1.5
Cre03.g197350.t1.2	Cre06.g262450	1.5
Cre03.g197350.t1.2	Cre08.g360700	1.6
Cre03.g197350.t1.2	Cre14.g620050	1.6
Cre03.g197350.t1.2	Cre17.g743447	1.6
Cre03.g197350.t1.2	Cre05.g243650	1.6
Cre03.g197350.t1.2	Cre01.g006600	1.6
Cre03.g197350.t1.2	Cre12.g537226	1.6
Cre03.g197350.t1.2	Cre12.g539205	1.6
Cre03.g197350.t1.2	Cre12.g547400	1.6
Cre03.g197350.t1.2	Cre12.g547450	1.6
Cre03.g197350.t1.2	Cre01.g037751	1.6
Cre03.g197350.t1.2	Cre01.g037700	1.6
Cre03.g197350.t1.2	Cre01.g009101	1.7
Cre03.g197350.t1.2	Cre01.g009050	1.7
Cre03.g197350.t1.2	Cre06.g278255	1.8
Cre03.g197350.t1.2	Cre07.g330450	1.9
Cre03.g197350.t1.2	Cre18.g749547	1.9
Cre03.g197350.t1.2	Cre02.g078700	2
Cre03.g197350.t1.2	Cre02.g078650	2
Cre03.g197350.t1.2	Cre02.g091650	2.1
Cre03.g197350.t1.2	Cre15.g636550	2.2
Cre03.g197350.t1.2	Cre10.g465150	2.3
Cre03.g197350.t1.2	Cre06.g301725	2.3
Cre03.g197350.t1.2	Cre09.g386650	2.3
Cre03.g197350.t1.2	Cre12.g557928	2.4
Cre03.g197350.t1.2	Cre12.g500600	2.4
Cre03.g197350.t1.2	Cre17.g733425	2.6
Cre03.g197350.t1.2	Cre12.g529950	2.6
Cre03.g197350.t1.2	Cre06.g289550	2.6
Cre03.g197350.t1.2	Cre06.g289600	2.6
Cre03.g197350.t1.2	Cre10.g424775	2.6
Cre03.g197350.t1.2	Cre03.g179921	2.6
Cre03.g197350.t1.2	Cre03.g179941	2.6
Cre03.g197350.t1.2	Cre26.g756747	2.6
Cre03.g197350.t1.2	Cre02.g142867	2.7
Cre03.g197350.t1.2	Cre09.g396650	2.7
Cre03.g197350.t1.2	Cre13.g573700	2.7
Cre03.g197350.t1.2	Cre13.g573650	2.7
Cre03.g197350.t1.2	Cre06.g249101	2.7
Cre03.g197350.t1.2	Cre02.g142352	2.7
Cre03.g197350.t1.2	Cre02.g142351	2.7
Cre03.g197350.t1.2	Cre04.g212050	2.7
Cre03.g197350.t1.2	Cre04.g212000	2.7
Cre03.g197350.t1.2	Cre12.g507333	2.7
Cre03.g197350.t1.2	Cre02.g114150	3
Cre03.g197350.t1.2	Cre02.g114200	3
Cre03.g197350.t1.2	Cre09.g402100	3
Cre03.g197350.t1.2	Cre07.g356960	3.1
Cre03.g197350.t1.2	Cre07.g356970	3.1
Cre03.g197350.t1.2	Cre03.g162601	3.1
Cre03.g197350.t1.2	Cre03.g162650	3.1
Cre03.g197350.t1.2	Cre14.g616650	3.2
Cre03.g197350.t1.2	Cre09.g395900	3.3
Cre03.g197350.t1.2	Cre03.g198750	3.3
Cre03.g197350.t1.2	Cre03.g198800	3.3
Cre03.g197350.t1.2	Cre04.g227200	3.3
Cre03.g197350.t1.2	Cre04.g217904	3.3
Cre03.g197350.t1.2	Cre11.g481650	3.3
Cre03.g197350.t1.2	Cre12.g486650	3.4
Cre03.g197350.t1.2	Cre08.g374850	3.4
Cre03.g197350.t1.2	Cre15.g639200	3.5
Cre03.g197350.t1.2	Cre15.g639150	3.5
Cre03.g197350.t1.2	Cre10.g457550	3.5
Cre03.g197350.t1.2	Cre03.g163500	3.5
Cre03.g197350.t1.2	Cre10.g421650	3.5
Cre03.g197350.t1.2	Cre03.g211409	3.5
Cre03.g197350.t1.2	Cre10.g452750	3.5
Cre03.g197350.t1.2	Cre12.g543800	3.5
Cre03.g197350.t1.2	Cre09.g389393	3.6
Cre03.g197350.t1.2	Cre09.g389430	3.6
Cre03.g197350.t1.2	Cre04.g223400	3.8
Cre03.g197350.t1.2	Cre04.g223450	3.8
Cre03.g197350.t1.2	Cre08.g377400	3.8
Cre03.g197350.t1.2	Cre09.g411350	3.8
Cre03.g197350.t1.2	Cre01.g038900	3.8
Cre03.g197350.t1.2	Cre05.g232003	3.9
Cre03.g197350.t1.2	Cre05.g232002	3.9
Cre03.g197350.t1.2	Cre11.g478400	4.2
Cre03.g197350.t1.2	Cre12.g538400	4.2
Cre03.g197350.t1.2	Cre08.g377550	4.4
Cre03.g197350.t1.2	Cre08.g377500	4.4
Cre03.g197350.t1.2	Cre10.g466250	4.4
Cre03.g197350.t1.2	Cre10.g466300	4.4
Cre03.g197350.t1.2	Cre05.g241647	4.4
Cre03.g197350.t1.2	Cre05.g241648	4.4
Cre03.g197350.t1.2	Cre02.g115650	4.4
Cre03.g197350.t1.2	Cre17.g745197	4.6
Cre03.g197350.t1.2	Cre06.g278184	4.6
Cre03.g197350.t1.2	Cre06.g301500	4.6
Cre03.g197350.t1.2	Cre02.g143667	4.6
Cre03.g197350.t1.2	Cre02.g074370	4.6
Cre03.g197350.t1.2	Cre02.g141005	4.6
Cre03.g197350.t1.2	Cre01.g023913	4.6
Cre03.g197350.t1.2	Cre04.g221250	4.6
Cre03.g197350.t1.2	Cre04.g221200	4.6
Cre03.g197350.t1.2	Cre09.g410350	4.7
Cre03.g197350.t1.2	Cre09.g410400	4.7
Cre03.g197350.t1.2	Cre16.g650425	4.8
Cre03.g197350.t1.2	Cre09.g391430	4.8
Cre03.g197350.t1.2	Cre09.g391393	4.8
Cre03.g197350.t1.2	Cre17.g698516	4.9
Cre03.g197350.t1.2	Cre17.g698532	4.9
Cre03.g197350.t1.2	Cre17.g716350	5
Cre03.g197350.t1.2	Cre03.g157200	5
Cre03.g197350.t1.2	Cre16.g671937	5.1
Cre03.g197350.t1.2	Cre16.g672049	5.1
Cre03.g197350.t1.2	Cre01.g035000	5.3
Cre03.g197350.t1.2	Cre07.g337200	5.3
Cre03.g197350.t1.2	Cre07.g337150	5.3
Cre03.g197350.t1.2	Cre09.g415250	5.4
Cre03.g197350.t1.2	Cre09.g415240	5.4
Cre03.g197350.t1.2	Cre02.g095134	5.4
Cre03.g197350.t1.2	Cre02.g095133	5.4
Cre03.g197350.t1.2	Cre08.g370116	5.4
Cre03.g197350.t1.2	Cre15.g643191	5.4
Cre03.g197350.t1.2	Cre15.g642539	5.4
Cre03.g197350.t1.2	Cre08.g381550	5.4
Cre03.g197350.t1.2	Cre16.g651150	5.5
Cre03.g197350.t1.2	Cre04.g225100	5.5
Cre03.g197350.t1.2	Cre12.g551001	5.6
Cre03.g197350.t1.2	Cre12.g550900	5.6
Cre03.g197350.t1.2	Cre13.g588026	5.6
Cre03.g197350.t1.2	Cre10.g459200	5.6
Cre03.g197350.t1.2	Cre12.g526000	5.6
Cre03.g197350.t1.2	Cre03.g158400	5.8
Cre03.g197350.t1.2	Cre04.g214321	5.9
Cre03.g197350.t1.2	Cre02.g092150	5.9
Cre03.g197350.t1.2	Cre16.g659450	6
Cre03.g197350.t1.2	Cre11.g480079	6
Cre03.g197350.t1.2	Cre02.g089400	6
Cre03.g197350.t1.2	Cre07.g343700	6.1
Cre03.g197350.t1.2	Cre06.g263300	6.2
Cre03.g197350.t1.2	Cre03.g167500	6.3
Cre03.g197350.t1.2	Cre03.g167450	6.3
Cre03.g197350.t1.2	Cre08.g368026	6.3
Cre03.g197350.t1.2	Cre07.g334150	6.3
Cre03.g197350.t1.2	Cre16.g693500	6.4
Cre03.g197350.t1.2	Cre06.g278157	6.5
Cre03.g197350.t1.2	Cre02.g087600	6.6
Cre03.g197350.t1.2	Cre03.g200319	6.6
Cre03.g197350.t1.2	Cre03.g200431	6.6
Cre03.g197350.t1.2	Cre07.g336650	6.7
Cre03.g197350.t1.2	Cre07.g336600	6.7
Cre03.g197350.t1.2	Cre11.g477050	6.7
Cre03.g197350.t1.2	Cre12.g555001	6.9
Cre03.g197350.t1.2	Cre12.g554929	6.9
Cre03.g197350.t1.2	Cre01.g027950	6.9
Cre03.g197350.t1.2	Cre09.g412600	7
Cre03.g197350.t1.2	Cre13.g573100	7.1
Cre03.g197350.t1.2	Cre13.g604905	7.2
Cre03.g197350.t1.2	Cre10.g447950	7.3
Cre03.g197350.t1.2	Cre06.g253569	7.4
Cre03.g197350.t1.2	Cre10.g456600	7.5
Cre03.g197350.t1.2	Cre06.g250550	7.5
Cre03.g197350.t1.2	Cre06.g298950	7.5
Cre03.g197350.t1.2	Cre10.g430501	7.5
Cre03.g197350.t1.2	Cre08.g365692	7.6
Cre03.g197350.t1.2	Cre08.g365664	7.6
Cre03.g197350.t1.2	Cre02.g073826	8.1
Cre03.g197350.t1.2	Cre02.g073850	8.1
Cre03.g197350.t1.2	Cre13.g582734	8.1
Cre03.g197350.t1.2	Cre14.g611484	8.2
Cre03.g197350.t1.2	Cre07.g312350	8.4
Cre03.g197350.t1.2	Cre07.g312400	8.4
Cre03.g197350.t1.2	Cre17.g725000	8.5
Cre03.g197350.t1.2	Cre04.g219925	8.6
Cre03.g197350.t1.2	Cre09.g391541	8.7
Cre03.g197350.t1.2	Cre09.g391578	8.7
Cre03.g197350.t1.2	Cre13.g577100	8.7
Cre03.g197350.t1.2	Cre13.g577150	8.7
Cre03.g197350.t1.2	Cre08.g375084	8.8
Cre03.g197350.t1.2	Cre03.g166850	8.8
Cre03.g197350.t1.2	Cre12.g538650	8.9
Cre03.g197350.t1.2	Cre12.g538600	8.9
Cre03.g197350.t1.2	Cre09.g393900	8.9
Cre03.g197350.t1.2	Cre09.g393953	8.9
Cre03.g197350.t1.2	Cre03.g160300	8.9
Cre03.g197350.t1.2	Cre13.g567750	9.3
Cre03.g197350.t1.2	Cre13.g567800	9.3
Cre03.g197350.t1.2	Cre10.g441050	9.3
Cre03.g197350.t1.2	Cre07.g356283	9.3
Cre03.g197350.t1.2	Cre13.g578200	9.3
Cre03.g197350.t1.2	Cre09.g413150	9.4
Cre03.g197350.t1.2	Cre09.g413141	9.4
Cre03.g197350.t1.2	Cre09.g386750	9.4
Cre03.g197350.t1.2	Cre03.g143707	9.4
Cre03.g197350.t1.2	Cre03.g143727	9.4
Cre03.g197350.t1.2	Cre10.g444950	9.4
Cre03.g197350.t1.2	Cre12.g507450	9.4
Cre03.g197350.t1.2	Cre08.g384285	9.6
Cre03.g197350.t1.2	Cre30.g758097	9.7
Cre03.g197350.t1.2	Cre10.g461500	9.7
Cre03.g197350.t1.2	Cre10.g462450	9.7
Cre03.g197350.t1.2	Cre09.g413800	9.8
Cre03.g197350.t1.2	Cre13.g579050	9.9
Cre03.g197350.t1.2	Cre13.g566750	9.9
Cre06.g261450.t1.2	Cre12.g507000	5.3e-08
Cre06.g261450.t1.2	Cre05.g233551	8.1e-08
Cre06.g261450.t1.2	Cre08.g364400	1.5e-07
Cre06.g261450.t1.2	Cre17.g736750	2.7e-07
Cre06.g261450.t1.2	Cre13.g566450	2.7e-07
Cre06.g261450.t1.2	Cre03.g144011	5.9e-07
Cre06.g261450.t1.2	Cre09.g398983	1.7e-06
Cre06.g261450.t1.2	Cre01.g051482	1.7e-06
Cre06.g261450.t1.2	Cre17.g742100	1.7e-06
Cre06.g261450.t1.2	Cre17.g742116	1.7e-06
Cre06.g261450.t1.2	Cre10.g417675	1.7e-06
Cre06.g261450.t1.2	Cre02.g116750	2e-06
Cre06.g261450.t1.2	Cre07.g329050	2.1e-06
Cre06.g261450.t1.2	Cre07.g321400	2.1e-06
Cre06.g261450.t1.2	Cre02.g078226	2.1e-06
Cre06.g261450.t1.2	Cre13.g575500	2.1e-06
Cre06.g261450.t1.2	Cre13.g575550	2.1e-06
Cre06.g261450.t1.2	Cre03.g160250	2.1e-06
Cre06.g261450.t1.2	Cre12.g559053	2.1e-06
Cre06.g261450.t1.2	Cre05.g233051	2.3e-06
Cre06.g261450.t1.2	Cre12.g515500	3.4e-06
Cre06.g261450.t1.2	Cre04.g223150	4.6e-06
Cre06.g261450.t1.2	Cre11.g478950	4.8e-06
Cre06.g261450.t1.2	Cre02.g090526	4.8e-06
Cre06.g261450.t1.2	Cre02.g088200	4.8e-06
Cre06.g261450.t1.2	Cre03.g179820	4.8e-06
Cre06.g261450.t1.2	Cre01.g018350	4.8e-06
Cre06.g261450.t1.2	Cre04.g226114	4.8e-06
Cre06.g261450.t1.2	Cre12.g554850	4.8e-06
Cre06.g261450.t1.2	Cre12.g484250	6.2e-06
Cre06.g261450.t1.2	Cre15.g635350	8.6e-06
Cre06.g261450.t1.2	Cre15.g635300	8.6e-06
Cre06.g261450.t1.2	Cre12.g537900	9.6e-06
Cre06.g261450.t1.2	Cre12.g537850	9.6e-06
Cre06.g261450.t1.2	Cre01.g020750	1e-05
Cre06.g261450.t1.2	Cre01.g020701	1e-05
Cre06.g261450.t1.2	Cre09.g413450	1.3e-05
Cre06.g261450.t1.2	Cre09.g394102	1.4e-05
Cre06.g261450.t1.2	Cre10.g434600	1.5e-05
Cre06.g261450.t1.2	Cre10.g434550	1.5e-05
Cre06.g261450.t1.2	Cre01.g030150	1.7e-05
Cre06.g261450.t1.2	Cre01.g053350	1.8e-05
Cre06.g261450.t1.2	Cre09.g387951	2e-05
Cre06.g261450.t1.2	Cre02.g092950	2e-05
Cre06.g261450.t1.2	Cre02.g092926	2e-05
Cre06.g261450.t1.2	Cre07.g325724	2.2e-05
Cre06.g261450.t1.2	Cre07.g325723	2.2e-05
Cre06.g261450.t1.2	Cre12.g488550	2.3e-05
Cre06.g261450.t1.2	Cre12.g488600	2.3e-05
Cre06.g261450.t1.2	Cre16.g673465	2.3e-05
Cre06.g261450.t1.2	Cre09.g386107	2.9e-05
Cre06.g261450.t1.2	Cre01.g072027	4e-05
Cre06.g261450.t1.2	Cre17.g733000	4e-05
Cre06.g261450.t1.2	Cre17.g732951	4e-05
Cre06.g261450.t1.2	Cre12.g539650	4.2e-05
Cre06.g261450.t1.2	Cre12.g537050	4.3e-05
Cre06.g261450.t1.2	Cre01.g041752	4.6e-05
Cre06.g261450.t1.2	Cre06.g271526	4.7e-05
Cre06.g261450.t1.2	Cre17.g705100	4.7e-05
Cre06.g261450.t1.2	Cre03.g143807	5.1e-05
Cre06.g261450.t1.2	Cre19.g750797	5.1e-05
Cre06.g261450.t1.2	Cre09.g399900	5.1e-05
Cre06.g261450.t1.2	Cre09.g399950	5.1e-05
Cre06.g261450.t1.2	Cre17.g735650	6.8e-05
Cre06.g261450.t1.2	Cre11.g467721	7.2e-05
Cre06.g261450.t1.2	Cre09.g392867	7.2e-05
Cre06.g261450.t1.2	Cre16.g687700	7.8e-05
Cre06.g261450.t1.2	Cre01.g012400	7.8e-05
Cre06.g261450.t1.2	Cre01.g012450	7.8e-05
Cre06.g261450.t1.2	Cre16.g689733	7.8e-05
Cre06.g261450.t1.2	Cre17.g719792	8.1e-05
Cre06.g261450.t1.2	Cre06.g269601	8.4e-05
Cre06.g261450.t1.2	Cre05.g243650	8.4e-05
Cre06.g261450.t1.2	Cre11.g467649	9e-05
Cre06.g261450.t1.2	Cre13.g565116	0.0001
Cre06.g261450.t1.2	Cre15.g637315	0.0001
Cre06.g261450.t1.2	Cre12.g514900	0.00012
Cre06.g261450.t1.2	Cre13.g585200	0.00014
Cre06.g261450.t1.2	Cre17.g712126	0.00015
Cre06.g261450.t1.2	Cre09.g399812	0.00015
Cre06.g261450.t1.2	Cre02.g142727	0.00018
Cre06.g261450.t1.2	Cre02.g078251	0.00018
Cre06.g261450.t1.2	Cre12.g550553	0.00019
Cre06.g261450.t1.2	Cre10.g466100	0.00019
Cre06.g261450.t1.2	Cre09.g416150	0.00019
Cre06.g261450.t1.2	Cre06.g290676	0.00019
Cre06.g261450.t1.2	Cre06.g254240	0.00019
Cre06.g261450.t1.2	Cre15.g637150	0.00019
Cre06.g261450.t1.2	Cre06.g278134	0.00021
Cre06.g261450.t1.2	Cre02.g089950	0.00021
Cre06.g261450.t1.2	Cre02.g090000	0.00021
Cre06.g261450.t1.2	Cre10.g444900	0.00021
Cre06.g261450.t1.2	Cre12.g506750	0.00022
Cre06.g261450.t1.2	Cre12.g483600	0.00023
Cre06.g261450.t1.2	Cre08.g373450	0.00023
Cre06.g261450.t1.2	Cre16.g670200	0.00023
Cre06.g261450.t1.2	Cre16.g670150	0.00023
Cre06.g261450.t1.2	Cre09.g416650	0.00024
Cre06.g261450.t1.2	Cre06.g301806	0.00026
Cre06.g261450.t1.2	Cre03.g146647	0.00026
Cre06.g261450.t1.2	Cre01.g001600	0.00027
Cre06.g261450.t1.2	Cre02.g091950	0.00028
Cre06.g261450.t1.2	Cre17.g734250	0.00029
Cre06.g261450.t1.2	Cre05.g237450	0.00029
Cre06.g261450.t1.2	Cre09.g399849	0.00031
Cre06.g261450.t1.2	Cre07.g347700	0.00032
Cre06.g261450.t1.2	Cre07.g347650	0.00032
Cre06.g261450.t1.2	Cre13.g607300	0.00036
Cre06.g261450.t1.2	Cre01.g019300	0.00041
Cre06.g261450.t1.2	Cre12.g549002	0.00043
Cre06.g261450.t1.2	Cre06.g289426	0.00047
Cre06.g261450.t1.2	Cre09.g401404	0.0005
Cre06.g261450.t1.2	Cre06.g299900	0.00051
Cre06.g261450.t1.2	Cre17.g745047	0.00056
Cre06.g261450.t1.2	Cre10.g449020	0.00058
Cre06.g261450.t1.2	Cre12.g483476	0.00059
Cre06.g261450.t1.2	Cre17.g714450	0.0006
Cre06.g261450.t1.2	Cre09.g389400	0.00064
Cre06.g261450.t1.2	Cre09.g389350	0.00064
Cre06.g261450.t1.2	Cre06.g259476	0.00065
Cre06.g261450.t1.2	Cre14.g617002	0.00069
Cre06.g261450.t1.2	Cre14.g617027	0.00069
Cre06.g261450.t1.2	Cre01.g016542	0.00086
Cre06.g261450.t1.2	Cre14.g608600	0.00087
Cre06.g261450.t1.2	Cre16.g678650	0.00087
Cre06.g261450.t1.2	Cre17.g743997	0.00087
Cre06.g261450.t1.2	Cre03.g174500	0.00087
Cre06.g261450.t1.2	Cre07.g343101	0.00091
Cre06.g261450.t1.2	Cre14.g628752	0.00091
Cre06.g261450.t1.2	Cre16.g689450	0.00091
Cre06.g261450.t1.2	Cre09.g398250	0.00091
Cre06.g261450.t1.2	Cre09.g400849	0.00091
Cre06.g261450.t1.2	Cre02.g141486	0.00091
Cre06.g261450.t1.2	Cre03.g144144	0.00091
Cre06.g261450.t1.2	Cre04.g217700	0.00091
Cre06.g261450.t1.2	Cre02.g142566	0.00092
Cre06.g261450.t1.2	Cre09.g406350	0.00093
Cre06.g261450.t1.2	Cre06.g252576	0.00097
Cre06.g261450.t1.2	Cre20.g751447	0.00099
Cre06.g261450.t1.2	Cre02.g141351	0.001
Cre06.g261450.t1.2	Cre02.g141250	0.001
Cre06.g261450.t1.2	Cre07.g330250	0.0011
Cre06.g261450.t1.2	Cre07.g330200	0.0011
Cre06.g261450.t1.2	Cre07.g356950	0.0011
Cre06.g261450.t1.2	Cre10.g427896	0.0011
Cre06.g261450.t1.2	Cre06.g287100	0.0012
Cre06.g261450.t1.2	Cre06.g287150	0.0012
Cre06.g261450.t1.2	Cre09.g398178	0.0012
Cre06.g261450.t1.2	Cre05.g230804	0.0013
Cre06.g261450.t1.2	Cre05.g238724	0.0013
Cre06.g261450.t1.2	Cre06.g310601	0.0014
Cre06.g261450.t1.2	Cre01.g016500	0.0014
Cre06.g261450.t1.2	Cre05.g235650	0.0014
Cre06.g261450.t1.2	Cre12.g510250	0.0014
Cre06.g261450.t1.2	Cre13.g565083	0.0014
Cre06.g261450.t1.2	Cre12.g513650	0.0015
Cre06.g261450.t1.2	Cre01.g044650	0.0016
Cre06.g261450.t1.2	Cre08.g370850	0.0016
Cre06.g261450.t1.2	Cre02.g120250	0.0017
Cre06.g261450.t1.2	Cre06.g308533	0.0017
Cre06.g261450.t1.2	Cre01.g005300	0.0021
Cre06.g261450.t1.2	Cre08.g358541	0.0023
Cre06.g261450.t1.2	Cre07.g317400	0.0024
Cre06.g261450.t1.2	Cre11.g469800	0.0024
Cre06.g261450.t1.2	Cre02.g095117	0.0025
Cre06.g261450.t1.2	Cre11.g481700	0.0026
Cre06.g261450.t1.2	Cre06.g260900	0.0026
Cre06.g261450.t1.2	Cre08.g358565	0.0027
Cre06.g261450.t1.2	Cre07.g323300	0.0027
Cre06.g261450.t1.2	Cre02.g076663	0.0028
Cre06.g261450.t1.2	Cre02.g142650	0.003
Cre06.g261450.t1.2	Cre02.g074626	0.0032
Cre06.g261450.t1.2	Cre10.g432900	0.0033
Cre06.g261450.t1.2	Cre10.g432850	0.0033
Cre06.g261450.t1.2	Cre17.g741272	0.0034
Cre06.g261450.t1.2	Cre12.g518350	0.0035
Cre06.g261450.t1.2	Cre12.g518400	0.0035
Cre06.g261450.t1.2	Cre01.g043500	0.0039
Cre06.g261450.t1.2	Cre12.g501403	0.0043
Cre06.g261450.t1.2	Cre15.g636004	0.0044
Cre06.g261450.t1.2	Cre15.g640900	0.0044
Cre06.g261450.t1.2	Cre03.g194900	0.0044
Cre06.g261450.t1.2	Cre11.g483351	0.0046
Cre06.g261450.t1.2	Cre01.g006614	0.0049
Cre06.g261450.t1.2	Cre17.g707850	0.0049
Cre06.g261450.t1.2	Cre09.g397845	0.0053
Cre06.g261450.t1.2	Cre02.g109300	0.0056
Cre06.g261450.t1.2	Cre07.g341251	0.0056
Cre06.g261450.t1.2	Cre42.g760447	0.0056
Cre06.g261450.t1.2	Cre09.g411150	0.0056
Cre06.g261450.t1.2	Cre03.g175750	0.0056
Cre06.g261450.t1.2	Cre12.g507550	0.0056
Cre06.g261450.t1.2	Cre12.g542550	0.0056
Cre06.g261450.t1.2	Cre07.g312600	0.0059
Cre06.g261450.t1.2	Cre07.g337933	0.006
Cre06.g261450.t1.2	Cre07.g343600	0.0061
Cre06.g261450.t1.2	Cre09.g386755	0.0061
Cre06.g261450.t1.2	Cre08.g372650	0.0062
Cre06.g261450.t1.2	Cre09.g404950	0.0062
Cre06.g261450.t1.2	Cre10.g422419	0.0062
Cre06.g261450.t1.2	Cre10.g431900	0.0063
Cre06.g261450.t1.2	Cre10.g431850	0.0063
Cre06.g261450.t1.2	Cre02.g142046	0.0065
Cre06.g261450.t1.2	Cre13.g577850	0.0071
Cre06.g261450.t1.2	Cre10.g457297	0.0073
Cre06.g261450.t1.2	Cre10.g457262	0.0073
Cre06.g261450.t1.2	Cre02.g074217	0.0074
Cre06.g261450.t1.2	Cre10.g437601	0.0075
Cre06.g261450.t1.2	Cre12.g498600	0.0078
Cre06.g261450.t1.2	Cre01.g023650	0.0079
Cre06.g261450.t1.2	Cre08.g358450	0.0082
Cre06.g261450.t1.2	Cre12.g561300	0.0085
Cre06.g261450.t1.2	Cre01.g042502	0.0087
Cre06.g261450.t1.2	Cre08.g382500	0.0088
Cre06.g261450.t1.2	Cre16.g680650	0.0088
Cre06.g261450.t1.2	Cre17.g731600	0.0088
Cre06.g261450.t1.2	Cre17.g731591	0.0088
Cre06.g261450.t1.2	Cre02.g086456	0.0089
Cre06.g261450.t1.2	Cre10.g434150	0.009
Cre06.g261450.t1.2	Cre10.g420550	0.009
Cre06.g261450.t1.2	Cre10.g420537	0.009
Cre06.g261450.t1.2	Cre16.g665650	0.0097
Cre06.g261450.t1.2	Cre06.g255550	0.0098
Cre06.g261450.t1.2	Cre16.g651300	0.01
Cre06.g261450.t1.2	Cre01.g071662	0.01
Cre06.g261450.t1.2	Cre01.g071297	0.01
Cre06.g261450.t1.2	Cre05.g233050	0.011
Cre06.g261450.t1.2	Cre03.g205585	0.011
Cre06.g261450.t1.2	Cre18.g749497	0.012
Cre06.g261450.t1.2	Cre18.g749447	0.012
Cre06.g261450.t1.2	Cre02.g073900	0.012
Cre06.g261450.t1.2	Cre12.g532900	0.012
Cre06.g261450.t1.2	Cre11.g468362	0.012
Cre06.g261450.t1.2	Cre03.g146887	0.013
Cre06.g261450.t1.2	Cre09.g410750	0.013
Cre06.g261450.t1.2	Cre11.g467663	0.014
Cre06.g261450.t1.2	Cre06.g257450	0.014
Cre06.g261450.t1.2	Cre17.g703932	0.014
Cre06.g261450.t1.2	Cre17.g703950	0.014
Cre06.g261450.t1.2	Cre06.g289300	0.014
Cre06.g261450.t1.2	Cre06.g289200	0.014
Cre06.g261450.t1.2	Cre17.g744047	0.014
Cre06.g261450.t1.2	Cre12.g539850	0.014
Cre06.g261450.t1.2	Cre11.g467620	0.014
Cre06.g261450.t1.2	Cre16.g664850	0.014
Cre06.g261450.t1.2	Cre03.g153306	0.014
Cre06.g261450.t1.2	Cre04.g231418	0.015
Cre06.g261450.t1.2	Cre17.g724873	0.015
Cre06.g261450.t1.2	Cre15.g638550	0.015
Cre06.g261450.t1.2	Cre10.g442950	0.015
Cre06.g261450.t1.2	Cre12.g539161	0.016
Cre06.g261450.t1.2	Cre04.g211600	0.016
Cre06.g261450.t1.2	Cre04.g211599	0.016
Cre06.g261450.t1.2	Cre02.g083273	0.016
Cre06.g261450.t1.2	Cre03.g210065	0.017
Cre06.g261450.t1.2	Cre03.g210177	0.017
Cre06.g261450.t1.2	Cre08.g373374	0.018
Cre06.g261450.t1.2	Cre16.g666627	0.018
Cre06.g261450.t1.2	Cre09.g400034	0.018
Cre06.g261450.t1.2	Cre06.g278286	0.018
Cre06.g261450.t1.2	Cre06.g278301	0.018
Cre06.g261450.t1.2	Cre02.g095036	0.018
Cre06.g261450.t1.2	Cre27.g757447	0.018
Cre06.g261450.t1.2	Cre01.g006600	0.018
Cre06.g261450.t1.2	Cre10.g445299	0.018
Cre06.g261450.t1.2	Cre10.g445226	0.018
Cre06.g261450.t1.2	Cre10.g445251	0.018
Cre06.g261450.t1.2	Cre04.g217986	0.018
Cre06.g261450.t1.2	Cre12.g539205	0.018
Cre06.g261450.t1.2	Cre04.g229300	0.018
Cre06.g261450.t1.2	Cre09.g416309	0.019
Cre06.g261450.t1.2	Cre01.g042650	0.019
Cre06.g261450.t1.2	Cre12.g528100	0.02
Cre06.g261450.t1.2	Cre02.g147300	0.021
Cre06.g261450.t1.2	Cre11.g467529	0.022
Cre06.g261450.t1.2	Cre10.g422450	0.022
Cre06.g261450.t1.2	Cre07.g312002	0.022
Cre06.g261450.t1.2	Cre13.g590450	0.022
Cre06.g261450.t1.2	Cre01.g023300	0.022
Cre06.g261450.t1.2	Cre16.g654450	0.022
Cre06.g261450.t1.2	Cre07.g353650	0.024
Cre06.g261450.t1.2	Cre07.g353600	0.024
Cre06.g261450.t1.2	Cre16.g695200	0.024
Cre06.g261450.t1.2	Cre03.g150101	0.024
Cre06.g261450.t1.2	Cre17.g696900	0.025
Cre06.g261450.t1.2	Cre13.g567700	0.025
Cre06.g261450.t1.2	Cre10.g445371	0.026
Cre06.g261450.t1.2	Cre04.g217987	0.026
Cre06.g261450.t1.2	Cre04.g217988	0.026
Cre06.g261450.t1.2	Cre05.g245350	0.027
Cre06.g261450.t1.2	Cre09.g389809	0.028
Cre06.g261450.t1.2	Cre12.g511400	0.028
Cre06.g261450.t1.2	Cre18.g748547	0.028
Cre06.g261450.t1.2	Cre09.g415350	0.029
Cre06.g261450.t1.2	Cre03.g193550	0.031
Cre06.g261450.t1.2	Cre12.g528600	0.033
Cre06.g261450.t1.2	Cre01.g006202	0.033
Cre06.g261450.t1.2	Cre09.g403950	0.034
Cre06.g261450.t1.2	Cre03.g200850	0.035
Cre06.g261450.t1.2	Cre17.g733752	0.035
Cre06.g261450.t1.2	Cre08.g358546	0.036
Cre06.g261450.t1.2	Cre08.g371751	0.036
Cre06.g261450.t1.2	Cre12.g558526	0.036
Cre06.g261450.t1.2	Cre10.g439550	0.037
Cre06.g261450.t1.2	Cre09.g386753	0.04
Cre06.g261450.t1.2	Cre09.g386754	0.04
Cre06.g261450.t1.2	Cre16.g678885	0.04
Cre06.g261450.t1.2	Cre24.g755247	0.04
Cre06.g261450.t1.2	Cre15.g642376	0.041
Cre06.g261450.t1.2	Cre06.g290950	0.041
Cre06.g261450.t1.2	Cre06.g278190	0.042
Cre06.g261450.t1.2	Cre11.g478350	0.043
Cre06.g261450.t1.2	Cre21.g752897	0.046
Cre06.g261450.t1.2	Cre04.g231124	0.046
Cre06.g261450.t1.2	Cre04.g214209	0.046
Cre06.g261450.t1.2	Cre04.g214097	0.046
Cre06.g261450.t1.2	Cre09.g411400	0.046
Cre06.g261450.t1.2	Cre05.g238200	0.048
Cre06.g261450.t1.2	Cre02.g144606	0.048
Cre06.g261450.t1.2	Cre02.g144550	0.048
Cre06.g261450.t1.2	Cre06.g255700	0.05
Cre06.g261450.t1.2	Cre03.g206550	0.05
Cre06.g261450.t1.2	Cre02.g087800	0.05
Cre06.g261450.t1.2	Cre12.g494052	0.051
Cre06.g261450.t1.2	Cre02.g074474	0.052
Cre06.g261450.t1.2	Cre16.g667200	0.052
Cre06.g261450.t1.2	Cre09.g386743	0.053
Cre06.g261450.t1.2	Cre03.g155976	0.054
Cre06.g261450.t1.2	Cre03.g155950	0.054
Cre06.g261450.t1.2	Cre06.g310150	0.055
Cre06.g261450.t1.2	Cre17.g716613	0.057
Cre06.g261450.t1.2	Cre17.g716625	0.057
Cre06.g261450.t1.2	Cre07.g349650	0.058
Cre06.g261450.t1.2	Cre17.g740323	0.058
Cre06.g261450.t1.2	Cre11.g467578	0.058
Cre06.g261450.t1.2	Cre06.g250902	0.06
Cre06.g261450.t1.2	Cre03.g198850	0.06
Cre06.g261450.t1.2	Cre03.g153650	0.067
Cre06.g261450.t1.2	Cre03.g153600	0.067
Cre06.g261450.t1.2	Cre09.g391726	0.068
Cre06.g261450.t1.2	Cre01.g043300	0.068
Cre06.g261450.t1.2	Cre09.g389986	0.069
Cre06.g261450.t1.2	Cre06.g309900	0.073
Cre06.g261450.t1.2	Cre03.g200450	0.074
Cre06.g261450.t1.2	Cre17.g710950	0.075
Cre06.g261450.t1.2	Cre17.g710900	0.075
Cre06.g261450.t1.2	Cre07.g331600	0.078
Cre06.g261450.t1.2	Cre09.g394350	0.078
Cre06.g261450.t1.2	Cre02.g115508	0.078
Cre06.g261450.t1.2	Cre09.g401626	0.081
Cre06.g261450.t1.2	Cre09.g411666	0.081
Cre06.g261450.t1.2	Cre09.g389050	0.082
Cre06.g261450.t1.2	Cre08.g379500	0.085
Cre06.g261450.t1.2	Cre03.g156650	0.087
Cre06.g261450.t1.2	Cre09.g399000	0.088
Cre06.g261450.t1.2	Cre09.g398950	0.088
Cre06.g261450.t1.2	Cre08.g373300	0.089
Cre06.g261450.t1.2	Cre14.g614650	0.089
Cre06.g261450.t1.2	Cre14.g614667	0.089
Cre06.g261450.t1.2	Cre10.g452850	0.09
Cre06.g261450.t1.2	Cre01.g001700	0.092
Cre06.g261450.t1.2	Cre11.g467530	0.093
Cre06.g261450.t1.2	Cre12.g489300	0.093
Cre06.g261450.t1.2	Cre13.g572350	0.094
Cre06.g261450.t1.2	Cre13.g572375	0.094
Cre06.g261450.t1.2	Cre02.g079004	0.097
Cre06.g261450.t1.2	Cre05.g236500	0.097
Cre06.g261450.t1.2	Cre05.g236450	0.097
Cre06.g261450.t1.2	Cre17.g738000	0.099
Cre06.g261450.t1.2	Cre01.g004400	0.099
Cre06.g261450.t1.2	Cre16.g689199	0.1
Cre06.g261450.t1.2	Cre06.g259900	0.1
Cre06.g261450.t1.2	Cre10.g454150	0.1
Cre06.g261450.t1.2	Cre14.g630775	0.1
Cre06.g261450.t1.2	Cre12.g515450	0.11
Cre06.g261450.t1.2	Cre02.g095153	0.11
Cre06.g261450.t1.2	Cre13.g576433	0.11
Cre06.g261450.t1.2	Cre13.g576466	0.11
Cre06.g261450.t1.2	Cre07.g327950	0.11
Cre06.g261450.t1.2	Cre06.g291250	0.11
Cre06.g261450.t1.2	Cre06.g291300	0.11
Cre06.g261450.t1.2	Cre16.g677738	0.11
Cre06.g261450.t1.2	Cre09.g398771	0.11
Cre06.g261450.t1.2	Cre12.g520500	0.11
Cre06.g261450.t1.2	Cre12.g520450	0.11
Cre06.g261450.t1.2	Cre13.g603850	0.12
Cre06.g261450.t1.2	Cre08.g373350	0.12
Cre06.g261450.t1.2	Cre14.g622270	0.12
Cre06.g261450.t1.2	Cre27.g757397	0.12
Cre06.g261450.t1.2	Cre21.g753097	0.12
Cre06.g261450.t1.2	Cre12.g530200	0.12
Cre06.g261450.t1.2	Cre14.g615300	0.12
Cre06.g261450.t1.2	Cre14.g615350	0.12
Cre06.g261450.t1.2	Cre21.g753197	0.13
Cre06.g261450.t1.2	Cre07.g344800	0.13
Cre06.g261450.t1.2	Cre06.g301725	0.13
Cre06.g261450.t1.2	Cre12.g550450	0.14
Cre06.g261450.t1.2	Cre12.g550501	0.14
Cre06.g261450.t1.2	Cre01.g014600	0.14
Cre06.g261450.t1.2	Cre08.g380250	0.14
Cre06.g261450.t1.2	Cre01.g041700	0.15
Cre06.g261450.t1.2	Cre06.g254450	0.15
Cre06.g261450.t1.2	Cre12.g552005	0.15
Cre06.g261450.t1.2	Cre02.g106600	0.15
Cre06.g261450.t1.2	Cre06.g261026	0.15
Cre06.g261450.t1.2	Cre05.g246800	0.16
Cre06.g261450.t1.2	Cre01.g013900	0.16
Cre06.g261450.t1.2	Cre07.g354700	0.16
Cre06.g261450.t1.2	Cre10.g424700	0.16
Cre06.g261450.t1.2	Cre10.g465757	0.16
Cre06.g261450.t1.2	Cre03.g148500	0.16
Cre06.g261450.t1.2	Cre03.g148450	0.16
Cre06.g261450.t1.2	Cre17.g742932	0.17
Cre06.g261450.t1.2	Cre10.g464300	0.18
Cre06.g261450.t1.2	Cre14.g612800	0.18
Cre06.g261450.t1.2	Cre02.g113450	0.18
Cre06.g261450.t1.2	Cre01.g041650	0.18
Cre06.g261450.t1.2	Cre01.g041667	0.18
Cre06.g261450.t1.2	Cre02.g089600	0.18
Cre06.g261450.t1.2	Cre04.g226700	0.18
Cre06.g261450.t1.2	Cre07.g312150	0.18
Cre06.g261450.t1.2	Cre19.g750597	0.19
Cre06.g261450.t1.2	Cre05.g232454	0.19
Cre06.g261450.t1.2	Cre01.g030968	0.19
Cre06.g261450.t1.2	Cre13.g583787	0.2
Cre06.g261450.t1.2	Cre06.g278285	0.2
Cre06.g261450.t1.2	Cre15.g641282	0.2
Cre06.g261450.t1.2	Cre01.g041100	0.2
Cre06.g261450.t1.2	Cre14.g621400	0.2
Cre06.g261450.t1.2	Cre16.g655430	0.2
Cre06.g261450.t1.2	Cre06.g264100	0.21
Cre06.g261450.t1.2	Cre07.g335250	0.21
Cre06.g261450.t1.2	Cre03.g194050	0.21
Cre06.g261450.t1.2	Cre02.g142226	0.23
Cre06.g261450.t1.2	Cre05.g231100	0.23
Cre06.g261450.t1.2	Cre05.g231050	0.23
Cre06.g261450.t1.2	Cre17.g728350	0.23
Cre06.g261450.t1.2	Cre17.g728300	0.23
Cre06.g261450.t1.2	Cre06.g278291	0.24
Cre06.g261450.t1.2	Cre03.g148250	0.24
Cre06.g261450.t1.2	Cre09.g386739	0.25
Cre06.g261450.t1.2	Cre12.g520800	0.25
Cre06.g261450.t1.2	Cre04.g220000	0.25
Cre06.g261450.t1.2	Cre17.g741650	0.25
Cre06.g261450.t1.2	Cre06.g278104	0.26
Cre06.g261450.t1.2	Cre06.g278105	0.26
Cre06.g261450.t1.2	Cre13.g568050	0.26
Cre06.g261450.t1.2	Cre16.g687050	0.27
Cre06.g261450.t1.2	Cre12.g492250	0.27
Cre06.g261450.t1.2	Cre12.g492200	0.27
Cre06.g261450.t1.2	Cre17.g713575	0.27
Cre06.g261450.t1.2	Cre07.g346917	0.27
Cre06.g261450.t1.2	Cre09.g386300	0.28
Cre06.g261450.t1.2	Cre01.g007051	0.28
Cre06.g261450.t1.2	Cre45.g760797	0.28
Cre06.g261450.t1.2	Cre22.g753397	0.29
Cre06.g261450.t1.2	Cre08.g373414	0.31
Cre06.g261450.t1.2	Cre06.g289950	0.32
Cre06.g261450.t1.2	Cre03.g204450	0.32
Cre06.g261450.t1.2	Cre16.g677026	0.32
Cre06.g261450.t1.2	Cre01.g010300	0.32
Cre06.g261450.t1.2	Cre12.g484834	0.33
Cre06.g261450.t1.2	Cre12.g484800	0.33
Cre06.g261450.t1.2	Cre09.g416750	0.33
Cre06.g261450.t1.2	Cre03.g163550	0.33
Cre06.g261450.t1.2	Cre03.g163600	0.33
Cre06.g261450.t1.2	Cre17.g735876	0.34
Cre06.g261450.t1.2	Cre11.g478128	0.34
Cre06.g261450.t1.2	Cre11.g478100	0.34
Cre06.g261450.t1.2	Cre04.g229026	0.35
Cre06.g261450.t1.2	Cre03.g149400	0.35
Cre06.g261450.t1.2	Cre09.g388763	0.35
Cre06.g261450.t1.2	Cre12.g539208	0.35
Cre06.g261450.t1.2	Cre03.g194100	0.35
Cre06.g261450.t1.2	Cre09.g401589	0.36
Cre06.g261450.t1.2	Cre01.g038400	0.36
Cre06.g261450.t1.2	Cre16.g658775	0.36
Cre06.g261450.t1.2	Cre01.g001685	0.37
Cre06.g261450.t1.2	Cre13.g573550	0.37
Cre06.g261450.t1.2	Cre02.g118400	0.37
Cre06.g261450.t1.2	Cre17.g698100	0.37
Cre06.g261450.t1.2	Cre17.g744497	0.37
Cre06.g261450.t1.2	Cre06.g294400	0.38
Cre06.g261450.t1.2	Cre16.g679109	0.39
Cre06.g261450.t1.2	Cre06.g278179	0.39
Cre06.g261450.t1.2	Cre02.g095112	0.39
Cre06.g261450.t1.2	Cre14.g630763	0.4
Cre06.g261450.t1.2	Cre16.g688633	0.4
Cre06.g261450.t1.2	Cre06.g270500	0.4
Cre06.g261450.t1.2	Cre12.g528750	0.41
Cre06.g261450.t1.2	Cre02.g115650	0.41
Cre06.g261450.t1.2	Cre07.g352251	0.42
Cre06.g261450.t1.2	Cre07.g352300	0.42
Cre06.g261450.t1.2	Cre02.g099550	0.43
Cre06.g261450.t1.2	Cre11.g467784	0.44
Cre06.g261450.t1.2	Cre10.g465550	0.46
Cre06.g261450.t1.2	Cre03.g205350	0.46
Cre06.g261450.t1.2	Cre03.g205400	0.46
Cre06.g261450.t1.2	Cre10.g461000	0.47
Cre06.g261450.t1.2	Cre09.g387986	0.48
Cre06.g261450.t1.2	Cre17.g746497	0.49
Cre06.g261450.t1.2	Cre02.g142346	0.49
Cre06.g261450.t1.2	Cre12.g495958	0.49
Cre06.g261450.t1.2	Cre01.g030550	0.49
Cre06.g261450.t1.2	Cre01.g044550	0.5
Cre06.g261450.t1.2	Cre02.g074400	0.5
Cre06.g261450.t1.2	Cre08.g366500	0.5
Cre06.g261450.t1.2	Cre08.g369950	0.5
Cre06.g261450.t1.2	Cre03.g203625	0.52
Cre06.g261450.t1.2	Cre06.g270050	0.52
Cre06.g261450.t1.2	Cre17.g743497	0.53
Cre06.g261450.t1.2	Cre14.g627917	0.54
Cre06.g261450.t1.2	Cre04.g219400	0.54
Cre06.g261450.t1.2	Cre17.g744097	0.55
Cre06.g261450.t1.2	Cre03.g150850	0.55
Cre06.g261450.t1.2	Cre03.g150800	0.55
Cre06.g261450.t1.2	Cre02.g100500	0.55
Cre06.g261450.t1.2	Cre02.g100450	0.55
Cre06.g261450.t1.2	Cre14.g620150	0.56
Cre06.g261450.t1.2	Cre15.g635700	0.57
Cre06.g261450.t1.2	Cre05.g236183	0.57
Cre06.g261450.t1.2	Cre05.g236216	0.57
Cre06.g261450.t1.2	Cre12.g537226	0.57
Cre06.g261450.t1.2	Cre03.g150767	0.58
Cre06.g261450.t1.2	Cre03.g150783	0.58
Cre06.g261450.t1.2	Cre17.g716500	0.58
Cre06.g261450.t1.2	Cre08.g383350	0.58
Cre06.g261450.t1.2	Cre03.g167712	0.59
Cre06.g261450.t1.2	Cre14.g611300	0.59
Cre06.g261450.t1.2	Cre16.g667701	0.6
Cre06.g261450.t1.2	Cre06.g278302	0.6
Cre06.g261450.t1.2	Cre13.g577800	0.6
Cre06.g261450.t1.2	Cre10.g459151	0.61
Cre06.g261450.t1.2	Cre10.g459100	0.61
Cre06.g261450.t1.2	Cre12.g537150	0.61
Cre06.g261450.t1.2	Cre02.g117781	0.62
Cre06.g261450.t1.2	Cre06.g278150	0.65
Cre06.g261450.t1.2	Cre21.g752147	0.65
Cre06.g261450.t1.2	Cre05.g232455	0.66
Cre06.g261450.t1.2	Cre03.g212977	0.67
Cre06.g261450.t1.2	Cre06.g254250	0.68
Cre06.g261450.t1.2	Cre01.g006766	0.68
Cre06.g261450.t1.2	Cre03.g153200	0.68
Cre06.g261450.t1.2	Cre15.g640400	0.7
Cre06.g261450.t1.2	Cre12.g510350	0.71
Cre06.g261450.t1.2	Cre12.g510300	0.71
Cre06.g261450.t1.2	Cre16.g690902	0.71
Cre06.g261450.t1.2	Cre17.g710879	0.72
Cre06.g261450.t1.2	Cre17.g710871	0.72
Cre06.g261450.t1.2	Cre17.g733850	0.75
Cre06.g261450.t1.2	Cre12.g520050	0.76
Cre06.g261450.t1.2	Cre09.g399775	0.76
Cre06.g261450.t1.2	Cre01.g006670	0.76
Cre06.g261450.t1.2	Cre07.g343250	0.76
Cre06.g261450.t1.2	Cre04.g215500	0.76
Cre06.g261450.t1.2	Cre04.g215550	0.76
Cre06.g261450.t1.2	Cre09.g413141	0.77
Cre06.g261450.t1.2	Cre03.g143707	0.77
Cre06.g261450.t1.2	Cre03.g143727	0.77
Cre06.g261450.t1.2	Cre01.g041400	0.79
Cre06.g261450.t1.2	Cre17.g738050	0.8
Cre06.g261450.t1.2	Cre12.g555152	0.84
Cre06.g261450.t1.2	Cre12.g555100	0.84
Cre06.g261450.t1.2	Cre02.g142353	0.85
Cre06.g261450.t1.2	Cre06.g278272	0.86
Cre06.g261450.t1.2	Cre09.g401108	0.87
Cre06.g261450.t1.2	Cre09.g416900	0.87
Cre06.g261450.t1.2	Cre11.g467665	0.87
Cre06.g261450.t1.2	Cre03.g192050	0.88
Cre06.g261450.t1.2	Cre03.g192100	0.88
Cre06.g261450.t1.2	Cre06.g249550	0.91
Cre06.g261450.t1.2	Cre06.g257476	0.91
Cre06.g261450.t1.2	Cre06.g293150	0.92
Cre06.g261450.t1.2	Cre03.g207100	0.96
Cre06.g261450.t1.2	Cre03.g188350	0.97
Cre06.g261450.t1.2	Cre15.g639552	0.97
Cre06.g261450.t1.2	Cre12.g550000	0.98
Cre06.g261450.t1.2	Cre12.g549950	0.98
Cre06.g261450.t1.2	Cre09.g396772	0.99
Cre06.g261450.t1.2	Cre02.g143900	0.99
Cre06.g261450.t1.2	Cre02.g079100	1
Cre06.g261450.t1.2	Cre05.g234892	1
Cre06.g261450.t1.2	Cre04.g217550	1
Cre06.g261450.t1.2	Cre15.g641875	1
Cre06.g261450.t1.2	Cre16.g676757	1
Cre06.g261450.t1.2	Cre17.g743697	1.1
Cre06.g261450.t1.2	Cre06.g258051	1.1
Cre06.g261450.t1.2	Cre17.g734564	1.1
Cre06.g261450.t1.2	Cre14.g618621	1.1
Cre06.g261450.t1.2	Cre17.g721900	1.1
Cre06.g261450.t1.2	Cre12.g493350	1.1
Cre06.g261450.t1.2	Cre01.g062537	1.1
Cre06.g261450.t1.2	Cre02.g096737	1.1
Cre06.g261450.t1.2	Cre03.g146407	1.1
Cre06.g261450.t1.2	Cre06.g254175	1.2
Cre06.g261450.t1.2	Cre06.g254150	1.2
Cre06.g261450.t1.2	Cre01.g008900	1.2
Cre06.g261450.t1.2	Cre03.g202200	1.2
Cre06.g261450.t1.2	Cre16.g693204	1.2
Cre06.g261450.t1.2	Cre07.g322350	1.2
Cre06.g261450.t1.2	Cre03.g205473	1.2
Cre06.g261450.t1.2	Cre14.g623200	1.2
Cre06.g261450.t1.2	Cre14.g623176	1.2
Cre06.g261450.t1.2	Cre16.g670550	1.2
Cre06.g261450.t1.2	Cre09.g386550	1.2
Cre06.g261450.t1.2	Cre10.g463700	1.2
Cre06.g261450.t1.2	Cre10.g465575	1.2
Cre06.g261450.t1.2	Cre10.g465600	1.2
Cre06.g261450.t1.2	Cre14.g622480	1.2
Cre06.g261450.t1.2	Cre27.g757347	1.2
Cre06.g261450.t1.2	Cre12.g539206	1.2
Cre06.g261450.t1.2	Cre08.g370650	1.2
Cre06.g261450.t1.2	Cre16.g690702	1.2
Cre06.g261450.t1.2	Cre16.g690700	1.2
Cre06.g261450.t1.2	Cre06.g310576	1.3
Cre06.g261450.t1.2	Cre06.g306050	1.3
Cre06.g261450.t1.2	Cre06.g310550	1.3
Cre06.g261450.t1.2	Cre07.g318426	1.3
Cre06.g261450.t1.2	Cre03.g200351	1.3
Cre06.g261450.t1.2	Cre35.g759497	1.3
Cre06.g261450.t1.2	Cre13.g588386	1.3
Cre06.g261450.t1.2	Cre02.g095045	1.3
Cre06.g261450.t1.2	Cre22.g754047	1.3
Cre06.g261450.t1.2	Cre12.g485350	1.4
Cre06.g261450.t1.2	Cre10.g432950	1.4
Cre06.g261450.t1.2	Cre09.g392988	1.4
Cre06.g261450.t1.2	Cre06.g278207	1.4
Cre06.g261450.t1.2	Cre06.g278208	1.4
Cre06.g261450.t1.2	Cre09.g393136	1.4
Cre06.g261450.t1.2	Cre16.g671650	1.4
Cre06.g261450.t1.2	Cre03.g152250	1.4
Cre06.g261450.t1.2	Cre03.g150750	1.4
Cre06.g261450.t1.2	Cre06.g295301	1.4
Cre06.g261450.t1.2	Cre03.g164750	1.5
Cre06.g261450.t1.2	Cre04.g229518	1.5
Cre06.g261450.t1.2	Cre08.g369550	1.5
Cre06.g261450.t1.2	Cre16.g668450	1.5
Cre06.g261450.t1.2	Cre14.g610200	1.5
Cre06.g261450.t1.2	Cre14.g633626	1.6
Cre06.g261450.t1.2	Cre16.g688000	1.6
Cre06.g261450.t1.2	Cre13.g583935	1.6
Cre06.g261450.t1.2	Cre13.g583972	1.6
Cre06.g261450.t1.2	Cre16.g686002	1.6
Cre06.g261450.t1.2	Cre16.g686000	1.6
Cre06.g261450.t1.2	Cre01.g011000	1.6
Cre06.g261450.t1.2	Cre09.g396050	1.6
Cre06.g261450.t1.2	Cre12.g527000	1.6
Cre06.g261450.t1.2	Cre06.g287900	1.7
Cre06.g261450.t1.2	Cre06.g287950	1.7
Cre06.g261450.t1.2	Cre03.g209057	1.7
Cre06.g261450.t1.2	Cre03.g209169	1.7
Cre06.g261450.t1.2	Cre16.g655800	1.7
Cre06.g261450.t1.2	Cre16.g655850	1.7
Cre06.g261450.t1.2	Cre11.g482400	1.7
Cre06.g261450.t1.2	Cre12.g546633	1.7
Cre06.g261450.t1.2	Cre02.g077800	1.8
Cre06.g261450.t1.2	Cre16.g695800	1.8
Cre06.g261450.t1.2	Cre07.g341925	1.8
Cre06.g261450.t1.2	Cre03.g144707	1.8
Cre06.g261450.t1.2	Cre01.g039626	1.8
Cre06.g261450.t1.2	Cre16.g671850	1.8
Cre06.g261450.t1.2	Cre06.g302276	1.8
Cre06.g261450.t1.2	Cre29.g757847	1.8
Cre06.g261450.t1.2	Cre13.g588368	1.8
Cre06.g261450.t1.2	Cre12.g499300	1.8
Cre06.g261450.t1.2	Cre12.g499250	1.8
Cre06.g261450.t1.2	Cre05.g243601	1.9
Cre06.g261450.t1.2	Cre01.g036250	1.9
Cre06.g261450.t1.2	Cre12.g547351	1.9
Cre06.g261450.t1.2	Cre12.g528650	1.9
Cre06.g261450.t1.2	Cre12.g528614	1.9
Cre06.g261450.t1.2	Cre12.g535650	1.9
Cre06.g261450.t1.2	Cre09.g394000	2
Cre06.g261450.t1.2	Cre07.g331650	2
Cre06.g261450.t1.2	Cre08.g358552	2
Cre06.g261450.t1.2	Cre12.g511950	2
Cre06.g261450.t1.2	Cre26.g756897	2
Cre06.g261450.t1.2	Cre14.g609800	2.1
Cre06.g261450.t1.2	Cre08.g373726	2.1
Cre06.g261450.t1.2	Cre08.g373764	2.1
Cre06.g261450.t1.2	Cre09.g406950	2.1
Cre06.g261450.t1.2	Cre15.g637000	2.1
Cre06.g261450.t1.2	Cre02.g089700	2.1
Cre06.g261450.t1.2	Cre07.g343333	2.2
Cre06.g261450.t1.2	Cre07.g343300	2.2
Cre06.g261450.t1.2	Cre06.g275350	2.2
Cre06.g261450.t1.2	Cre25.g756397	2.2
Cre06.g261450.t1.2	Cre07.g324233	2.2
Cre06.g261450.t1.2	Cre16.g674065	2.2
Cre06.g261450.t1.2	Cre03.g146307	2.2
Cre06.g261450.t1.2	Cre16.g684603	2.2
Cre06.g261450.t1.2	Cre16.g684491	2.2
Cre06.g261450.t1.2	Cre15.g643704	2.3
Cre06.g261450.t1.2	Cre16.g667057	2.3
Cre06.g261450.t1.2	Cre13.g568750	2.3
Cre06.g261450.t1.2	Cre13.g568700	2.3
Cre06.g261450.t1.2	Cre10.g426600	2.3
Cre06.g261450.t1.2	Cre11.g467540	2.3
Cre06.g261450.t1.2	Cre07.g342200	2.3
Cre06.g261450.t1.2	Cre17.g709500	2.4
Cre06.g261450.t1.2	Cre32.g758547	2.4
Cre06.g261450.t1.2	Cre07.g339950	2.4
Cre06.g261450.t1.2	Cre07.g339926	2.4
Cre06.g261450.t1.2	Cre03.g204750	2.4
Cre06.g261450.t1.2	Cre03.g204751	2.4
Cre06.g261450.t1.2	Cre10.g420650	2.5
Cre06.g261450.t1.2	Cre12.g557950	2.5
Cre06.g261450.t1.2	Cre06.g283400	2.5
Cre06.g261450.t1.2	Cre13.g584250	2.5
Cre06.g261450.t1.2	Cre12.g504050	2.6
Cre06.g261450.t1.2	Cre12.g504100	2.6
Cre06.g261450.t1.2	Cre02.g101050	2.6
Cre06.g261450.t1.2	Cre03.g149517	2.6
Cre06.g261450.t1.2	Cre06.g293350	2.6
Cre06.g261450.t1.2	Cre01.g012300	2.7
Cre06.g261450.t1.2	Cre01.g012350	2.7
Cre06.g261450.t1.2	Cre09.g389949	2.7
Cre06.g261450.t1.2	Cre15.g640450	2.7
Cre06.g261450.t1.2	Cre17.g724350	2.7
Cre06.g261450.t1.2	Cre09.g394436	2.7
Cre06.g261450.t1.2	Cre09.g394399	2.7
Cre06.g261450.t1.2	Cre06.g250450	2.8
Cre06.g261450.t1.2	Cre06.g250400	2.8
Cre06.g261450.t1.2	Cre17.g712050	2.8
Cre06.g261450.t1.2	Cre17.g712100	2.8
Cre06.g261450.t1.2	Cre17.g736437	2.8
Cre06.g261450.t1.2	Cre17.g736400	2.8
Cre06.g261450.t1.2	Cre09.g404200	2.8
Cre06.g261450.t1.2	Cre05.g234400	2.8
Cre06.g261450.t1.2	Cre12.g536650	2.9
Cre06.g261450.t1.2	Cre10.g453100	2.9
Cre06.g261450.t1.2	Cre16.g653450	2.9
Cre06.g261450.t1.2	Cre17.g722550	3
Cre06.g261450.t1.2	Cre17.g722526	3
Cre06.g261450.t1.2	Cre08.g377200	3
Cre06.g261450.t1.2	Cre07.g315450	3
Cre06.g261450.t1.2	Cre12.g501350	3
Cre06.g261450.t1.2	Cre13.g578350	3
Cre06.g261450.t1.2	Cre13.g578201	3
Cre06.g261450.t1.2	Cre01.g033832	3
Cre06.g261450.t1.2	Cre14.g611900	3
Cre06.g261450.t1.2	Cre07.g333781	3
Cre06.g261450.t1.2	Cre32.g758647	3
Cre06.g261450.t1.2	Cre12.g491600	3
Cre06.g261450.t1.2	Cre06.g278157	3.1
Cre06.g261450.t1.2	Cre09.g412940	3.1
Cre06.g261450.t1.2	Cre06.g253902	3.1
Cre06.g261450.t1.2	Cre05.g243803	3.1
Cre06.g261450.t1.2	Cre03.g162250	3.2
Cre06.g261450.t1.2	Cre12.g484600	3.2
Cre06.g261450.t1.2	Cre12.g484650	3.2
Cre06.g261450.t1.2	Cre09.g413150	3.3
Cre06.g261450.t1.2	Cre03.g143867	3.4
Cre06.g261450.t1.2	Cre12.g536301	3.5
Cre06.g261450.t1.2	Cre12.g536251	3.5
Cre06.g261450.t1.2	Cre02.g142867	3.5
Cre06.g261450.t1.2	Cre08.g384850	3.5
Cre06.g261450.t1.2	Cre17.g700300	3.5
Cre06.g261450.t1.2	Cre43.g760497	3.5
Cre06.g261450.t1.2	Cre03.g160500	3.5
Cre06.g261450.t1.2	Cre03.g160450	3.5
Cre06.g261450.t1.2	Cre02.g119700	3.6
Cre06.g261450.t1.2	Cre02.g119651	3.6
Cre06.g261450.t1.2	Cre05.g232350	3.6
Cre06.g261450.t1.2	Cre05.g232400	3.6
Cre06.g261450.t1.2	Cre08.g378351	3.7
Cre06.g261450.t1.2	Cre10.g436850	3.7
Cre06.g261450.t1.2	Cre10.g436800	3.7
Cre06.g261450.t1.2	Cre06.g294800	3.7
Cre06.g261450.t1.2	Cre06.g268550	3.7
Cre06.g261450.t1.2	Cre10.g422350	3.7
Cre06.g261450.t1.2	Cre06.g299450	3.8
Cre06.g261450.t1.2	Cre06.g299476	3.8
Cre06.g261450.t1.2	Cre03.g195326	3.8
Cre06.g261450.t1.2	Cre17.g719325	3.9
Cre06.g261450.t1.2	Cre02.g092850	3.9
Cre06.g261450.t1.2	Cre02.g092800	3.9
Cre06.g261450.t1.2	Cre02.g092983	3.9
Cre06.g261450.t1.2	Cre02.g075850	3.9
Cre06.g261450.t1.2	Cre04.g230046	3.9
Cre06.g261450.t1.2	Cre04.g230144	3.9
Cre06.g261450.t1.2	Cre08.g374550	4
Cre06.g261450.t1.2	Cre09.g394600	4
Cre06.g261450.t1.2	Cre14.g627750	4
Cre06.g261450.t1.2	Cre17.g698266	4.1
Cre06.g261450.t1.2	Cre04.g217966	4.1
Cre06.g261450.t1.2	Cre11.g467589	4.1
Cre06.g261450.t1.2	Cre01.g001671	4.1
Cre06.g261450.t1.2	Cre01.g001678	4.1
Cre06.g261450.t1.2	Cre03.g208555	4.1
Cre06.g261450.t1.2	Cre16.g671200	4.2
Cre06.g261450.t1.2	Cre12.g528450	4.2
Cre06.g261450.t1.2	Cre14.g631500	4.2
Cre06.g261450.t1.2	Cre16.g665364	4.2
Cre06.g261450.t1.2	Cre17.g704802	4.2
Cre06.g261450.t1.2	Cre12.g550500	4.2
Cre06.g261450.t1.2	Cre16.g689201	4.2
Cre06.g261450.t1.2	Cre16.g667769	4.3
Cre06.g261450.t1.2	Cre17.g743447	4.3
Cre06.g261450.t1.2	Cre05.g238687	4.3
Cre06.g261450.t1.2	Cre02.g095125	4.3
Cre06.g261450.t1.2	Cre17.g742500	4.3
Cre06.g261450.t1.2	Cre28.g757647	4.3
Cre06.g261450.t1.2	Cre12.g515850	4.4
Cre06.g261450.t1.2	Cre08.g358543	4.4
Cre06.g261450.t1.2	Cre10.g424100	4.4
Cre06.g261450.t1.2	Cre10.g424150	4.4
Cre06.g261450.t1.2	Cre06.g250600	4.5
Cre06.g261450.t1.2	Cre03.g166250	4.5
Cre06.g261450.t1.2	Cre03.g166300	4.5
Cre06.g261450.t1.2	Cre16.g665600	4.5
Cre06.g261450.t1.2	Cre17.g706400	4.5
Cre06.g261450.t1.2	Cre12.g514200	4.6
Cre06.g261450.t1.2	Cre03.g169601	4.6
Cre06.g261450.t1.2	Cre03.g169650	4.6
Cre06.g261450.t1.2	Cre11.g469224	4.6
Cre06.g261450.t1.2	Cre05.g238343	4.6
Cre06.g261450.t1.2	Cre12.g492504	4.7
Cre06.g261450.t1.2	Cre05.g233100	4.7
Cre06.g261450.t1.2	Cre06.g271500	4.7
Cre06.g261450.t1.2	Cre02.g141666	4.8
Cre06.g261450.t1.2	Cre30.g758197	4.8
Cre06.g261450.t1.2	Cre30.g758147	4.8
Cre06.g261450.t1.2	Cre06.g291700	4.8
Cre06.g261450.t1.2	Cre06.g291650	4.8
Cre06.g261450.t1.2	Cre08.g381750	4.8
Cre06.g261450.t1.2	Cre16.g666653	4.8
Cre06.g261450.t1.2	Cre08.g362100	4.9
Cre06.g261450.t1.2	Cre07.g346350	4.9
Cre06.g261450.t1.2	Cre02.g142446	4.9
Cre06.g261450.t1.2	Cre07.g324150	4.9
Cre06.g261450.t1.2	Cre07.g324100	4.9
Cre06.g261450.t1.2	Cre11.g480502	4.9
Cre06.g261450.t1.2	Cre02.g107350	5
Cre06.g261450.t1.2	Cre02.g107300	5
Cre06.g261450.t1.2	Cre17.g723250	5.1
Cre06.g261450.t1.2	Cre17.g723300	5.1
Cre06.g261450.t1.2	Cre17.g702576	5.1
Cre06.g261450.t1.2	Cre17.g702600	5.1
Cre06.g261450.t1.2	Cre03.g201215	5.1
Cre06.g261450.t1.2	Cre08.g364989	5.1
Cre06.g261450.t1.2	Cre09.g413566	5.2
Cre06.g261450.t1.2	Cre10.g458150	5.2
Cre06.g261450.t1.2	Cre14.g612100	5.3
Cre06.g261450.t1.2	Cre03.g181800	5.3
Cre06.g261450.t1.2	Cre03.g181900	5.3
Cre06.g261450.t1.2	Cre09.g395991	5.3
Cre06.g261450.t1.2	Cre07.g346300	5.4
Cre06.g261450.t1.2	Cre01.g024650	5.4
Cre06.g261450.t1.2	Cre08.g380000	5.4
Cre06.g261450.t1.2	Cre05.g241250	5.4
Cre06.g261450.t1.2	Cre07.g353400	5.4
Cre06.g261450.t1.2	Cre03.g206087	5.4
Cre06.g261450.t1.2	Cre04.g217984	5.4
Cre06.g261450.t1.2	Cre12.g539204	5.4
Cre06.g261450.t1.2	Cre11.g467742	5.4
Cre06.g261450.t1.2	Cre17.g708750	5.5
Cre06.g261450.t1.2	Cre12.g539207	5.5
Cre06.g261450.t1.2	Cre12.g489850	5.6
Cre06.g261450.t1.2	Cre04.g217985	5.6
Cre06.g261450.t1.2	Cre01.g050950	5.6
Cre06.g261450.t1.2	Cre01.g051000	5.6
Cre06.g261450.t1.2	Cre12.g533450	5.6
Cre06.g261450.t1.2	Cre16.g693600	5.7
Cre06.g261450.t1.2	Cre03.g190100	5.8
Cre06.g261450.t1.2	Cre03.g190050	5.8
Cre06.g261450.t1.2	Cre16.g662750	5.8
Cre06.g261450.t1.2	Cre03.g170600	5.8
Cre06.g261450.t1.2	Cre11.g467523	6
Cre06.g261450.t1.2	Cre13.g579076	6
Cre06.g261450.t1.2	Cre01.g019750	6
Cre06.g261450.t1.2	Cre01.g019700	6
Cre06.g261450.t1.2	Cre03.g165500	6
Cre06.g261450.t1.2	Cre12.g531550	6.1
Cre06.g261450.t1.2	Cre06.g278093	6.1
Cre06.g261450.t1.2	Cre06.g278094	6.1
Cre06.g261450.t1.2	Cre01.g047218	6.1
Cre06.g261450.t1.2	Cre09.g399960	6.1
Cre06.g261450.t1.2	Cre09.g399997	6.1
Cre06.g261450.t1.2	Cre18.g749897	6.1
Cre06.g261450.t1.2	Cre12.g500350	6.1
Cre06.g261450.t1.2	Cre12.g500300	6.1
Cre06.g261450.t1.2	Cre09.g398475	6.2
Cre06.g261450.t1.2	Cre02.g078150	6.2
Cre06.g261450.t1.2	Cre02.g078100	6.2
Cre06.g261450.t1.2	Cre11.g467670	6.3
Cre06.g261450.t1.2	Cre12.g517050	6.5
Cre06.g261450.t1.2	Cre12.g560550	6.5
Cre06.g261450.t1.2	Cre12.g560600	6.5
Cre06.g261450.t1.2	Cre03.g146567	6.6
Cre06.g261450.t1.2	Cre12.g507001	6.6
Cre06.g261450.t1.2	Cre13.g576250	6.7
Cre06.g261450.t1.2	Cre16.g679221	6.7
Cre06.g261450.t1.2	Cre03.g195900	6.7
Cre06.g261450.t1.2	Cre03.g195850	6.7
Cre06.g261450.t1.2	Cre14.g622050	6.7
Cre06.g261450.t1.2	Cre16.g663315	6.8
Cre06.g261450.t1.2	Cre16.g663280	6.8
Cre06.g261450.t1.2	Cre07.g346950	6.8
Cre06.g261450.t1.2	Cre10.g428720	7.1
Cre06.g261450.t1.2	Cre16.g686789	7.1
Cre06.g261450.t1.2	Cre07.g323326	7.1
Cre06.g261450.t1.2	Cre18.g748597	7.2
Cre06.g261450.t1.2	Cre12.g505650	7.2
Cre06.g261450.t1.2	Cre01.g032300	7.4
Cre06.g261450.t1.2	Cre10.g430450	7.4
Cre06.g261450.t1.2	Cre09.g395925	7.4
Cre06.g261450.t1.2	Cre17.g711480	7.4
Cre06.g261450.t1.2	Cre12.g497700	7.4
Cre06.g261450.t1.2	Cre07.g325759	7.5
Cre06.g261450.t1.2	Cre13.g605404	7.6
Cre06.g261450.t1.2	Cre10.g437150	7.6
Cre06.g261450.t1.2	Cre10.g457750	7.6
Cre06.g261450.t1.2	Cre10.g457801	7.6
Cre06.g261450.t1.2	Cre16.g661150	7.6
Cre06.g261450.t1.2	Cre16.g689500	7.7
Cre06.g261450.t1.2	Cre03.g150900	7.7
Cre06.g261450.t1.2	Cre07.g325752	7.7
Cre06.g261450.t1.2	Cre02.g082550	7.7
Cre06.g261450.t1.2	Cre13.g583200	7.8
Cre06.g261450.t1.2	Cre06.g304450	7.8
Cre06.g261450.t1.2	Cre02.g115550	7.8
Cre06.g261450.t1.2	Cre07.g314050	7.9
Cre06.g261450.t1.2	Cre17.g738850	7.9
Cre06.g261450.t1.2	Cre12.g485438	8
Cre06.g261450.t1.2	Cre10.g453750	8
Cre06.g261450.t1.2	Cre09.g398549	8.1
Cre06.g261450.t1.2	Cre07.g354550	8.1
Cre06.g261450.t1.2	Cre02.g118750	8.2
Cre06.g261450.t1.2	Cre09.g407016	8.2
Cre06.g261450.t1.2	Cre12.g525350	8.2
Cre06.g261450.t1.2	Cre12.g525300	8.2
Cre06.g261450.t1.2	Cre04.g213350	8.2
Cre06.g261450.t1.2	Cre16.g660430	8.3
Cre06.g261450.t1.2	Cre09.g392951	8.3
Cre06.g261450.t1.2	Cre09.g398512	8.3
Cre06.g261450.t1.2	Cre09.g398401	8.3
Cre06.g261450.t1.2	Cre05.g244701	8.6
Cre06.g261450.t1.2	Cre06.g256150	8.6
Cre06.g261450.t1.2	Cre02.g114550	8.6
Cre06.g261450.t1.2	Cre02.g114575	8.6
Cre06.g261450.t1.2	Cre12.g548577	8.6
Cre06.g261450.t1.2	Cre31.g758497	8.7
Cre06.g261450.t1.2	Cre05.g241655	8.7
Cre06.g261450.t1.2	Cre05.g234500	8.7
Cre06.g261450.t1.2	Cre12.g551800	8.8
Cre06.g261450.t1.2	Cre06.g284650	8.8
Cre06.g261450.t1.2	Cre09.g397095	8.9
Cre06.g261450.t1.2	Cre09.g397100	8.9
Cre06.g261450.t1.2	Cre10.g437900	8.9
Cre06.g261450.t1.2	Cre01.g052450	8.9
Cre06.g261450.t1.2	Cre02.g143858	9
Cre06.g261450.t1.2	Cre03.g154050	9
Cre06.g261450.t1.2	Cre04.g226138	9
Cre06.g261450.t1.2	Cre01.g051400	9.1
Cre06.g261450.t1.2	Cre01.g051350	9.1
Cre06.g261450.t1.2	Cre12.g518450	9.1
Cre06.g261450.t1.2	Cre10.g417450	9.2
Cre06.g261450.t1.2	Cre17.g698900	9.2
Cre06.g261450.t1.2	Cre04.g222700	9.3
Cre06.g261450.t1.2	Cre03.g155300	9.3
Cre06.g261450.t1.2	Cre10.g449400	9.4
Cre06.g261450.t1.2	Cre09.g387949	9.4
Cre06.g261450.t1.2	Cre02.g142900	9.4
Cre06.g261450.t1.2	Cre02.g142950	9.4
Cre06.g261450.t1.2	Cre16.g660951	9.4
Cre06.g261450.t1.2	Cre01.g051211	9.5
Cre06.g261450.t1.2	Cre09.g398734	9.5
Cre06.g261450.t1.2	Cre05.g239450	9.6
Cre06.g261450.t1.2	Cre02.g095088	9.6
Cre06.g261450.t1.2	Cre12.g498750	9.7
Cre06.g261450.t1.2	Cre12.g498700	9.7
Cre06.g261450.t1.2	Cre07.g325726	9.8
Cre06.g261450.t1.2	Cre16.g669193	9.8
Cre06.g261450.t1.2	Cre01.g038750	9.8
Cre06.g261450.t1.2	Cre06.g297150	9.9
Cre06.g261450.t1.2	Cre09.g417150	9.9
Cre06.g261450.t1.2	Cre02.g144010	10
Cre06.g261450.t1.2	Cre02.g144009	10
Cre07.g344050.t1.1	Cre07.g350750	2.4
Cre07.g344050.t1.1	Cre07.g350800	2.4
Cre07.g344050.t1.1	Cre09.g390134	3.6
Cre07.g344050.t1.1	Cre09.g390171	3.6
Cre07.g344050.t1.1	Cre14.g630750	3.8
Cre07.g344050.t1.1	Cre02.g111600	3.9
Cre07.g344050.t1.1	Cre14.g617800	4.4
Cre07.g344050.t1.1	Cre14.g617826	4.4
Cre07.g344050.t1.1	Cre04.g219500	5
Cre07.g344050.t1.1	Cre07.g352075	5.4
Cre07.g344050.t1.1	Cre08.g361350	7.3
Cre07.g344050.t1.1	Cre07.g324222	8.1
Cre07.g344050.t1.1	Cre04.g231516	9
Cre07.g344050.t1.1	Cre04.g216700	9.9
Cre09.g393728.t1.1	Cre13.g603450	9.1
Cre09.g393728.t1.1	Cre07.g358050	9.5
Cre09.g393728.t1.1	Cre16.g689199	9.5
Cre09.g393728.t1.1	Cre16.g681250	9.5
Cre10.g446900.t1.2	Cre01.g034325	2.2
Cre10.g446900.t1.2	Cre14.g619900	3.4
Cre10.g446900.t1.2	Cre14.g619854	3.4
Cre10.g446900.t1.2	Cre03.g206705	4.7
Cre10.g446900.t1.2	Cre03.g181650	5.8
Cre10.g446900.t1.2	Cre03.g181600	5.8
Cre10.g446900.t1.2	Cre16.g653200	6.8
Cre10.g446900.t1.2	Cre16.g653250	6.8
Cre10.g446900.t1.2	Cre02.g103200	7
Cre10.g446900.t1.2	Cre02.g082750	7.5
Cre10.g446900.t1.2	Cre02.g093800	7.8
Cre10.g446900.t1.2	Cre02.g093750	7.8
Cre10.g446900.t1.2	Cre07.g316350	9.1
Cre10.g446900.t1.2	Cre07.g316400	9.1
Cre10.g446900.t1.2	Cre06.g288500	9.2
Cre10.g446900.t1.2	Cre03.g195050	9.5
Cre10.g446900.t1.2	Cre03.g195000	9.5
Cre11.g482700.t1.2	Cre10.g464450	0.002
Cre11.g482700.t1.2	Cre10.g464500	0.002
Cre11.g482700.t1.2	Cre08.g374150	0.026
Cre11.g482700.t1.2	Cre11.g482150	0.034
Cre11.g482700.t1.2	Cre04.g217906	0.1
Cre11.g482700.t1.2	Cre04.g217905	0.1
Cre11.g482700.t1.2	Cre01.g054550	0.11
Cre11.g482700.t1.2	Cre01.g054600	0.11
Cre11.g482700.t1.2	Cre01.g012100	0.17
Cre11.g482700.t1.2	Cre12.g488100	0.2
Cre11.g482700.t1.2	Cre07.g315432	0.24
Cre11.g482700.t1.2	Cre02.g080050	0.48
Cre11.g482700.t1.2	Cre02.g080100	0.48
Cre11.g482700.t1.2	Cre08.g365550	0.56
Cre11.g482700.t1.2	Cre14.g623050	0.91
Cre11.g482700.t1.2	Cre17.g734300	1
Cre11.g482700.t1.2	Cre07.g325752	1
Cre11.g482700.t1.2	Cre08.g379300	1.4
Cre11.g482700.t1.2	Cre08.g379200	1.4
Cre11.g482700.t1.2	Cre14.g632759	1.4
Cre11.g482700.t1.2	Cre14.g632767	1.4
Cre11.g482700.t1.2	Cre07.g336700	1.4
Cre11.g482700.t1.2	Cre07.g336750	1.4
Cre11.g482700.t1.2	Cre06.g277050	1.7
Cre11.g482700.t1.2	Cre06.g277100	1.7
Cre11.g482700.t1.2	Cre08.g358531	1.7
Cre11.g482700.t1.2	Cre08.g358530	1.7
Cre11.g482700.t1.2	Cre12.g524550	1.8
Cre11.g482700.t1.2	Cre12.g524500	1.8
Cre11.g482700.t1.2	Cre06.g298225	1.8
Cre11.g482700.t1.2	Cre06.g298251	1.8
Cre11.g482700.t1.2	Cre09.g394100	1.9
Cre11.g482700.t1.2	Cre09.g394050	1.9
Cre11.g482700.t1.2	Cre37.g759797	2.2
Cre11.g482700.t1.2	Cre14.g633350	2.3
Cre11.g482700.t1.2	Cre14.g633400	2.3
Cre11.g482700.t1.2	Cre16.g683600	3.1
Cre11.g482700.t1.2	Cre13.g578074	3.1
Cre11.g482700.t1.2	Cre03.g191750	3.2
Cre11.g482700.t1.2	Cre03.g154900	3.3
Cre11.g482700.t1.2	Cre03.g154850	3.3
Cre11.g482700.t1.2	Cre10.g457650	3.3
Cre11.g482700.t1.2	Cre10.g457600	3.3
Cre11.g482700.t1.2	Cre04.g225250	3.6
Cre11.g482700.t1.2	Cre01.g063632	4.3
Cre11.g482700.t1.2	Cre01.g063997	4.3
Cre11.g482700.t1.2	Cre04.g220350	4.5
Cre11.g482700.t1.2	Cre16.g668150	4.7
Cre11.g482700.t1.2	Cre08.g366400	5.1
Cre11.g482700.t1.2	Cre08.g366350	5.1
Cre11.g482700.t1.2	Cre01.g041550	5.3
Cre11.g482700.t1.2	Cre04.g228350	5.4
Cre11.g482700.t1.2	Cre13.g590850	5.5
Cre11.g482700.t1.2	Cre13.g590900	5.5
Cre11.g482700.t1.2	Cre06.g258566	5.6
Cre11.g482700.t1.2	Cre12.g508643	5.8
Cre11.g482700.t1.2	Cre13.g578200	7.1
Cre11.g482700.t1.2	Cre03.g185200	7.3
Cre11.g482700.t1.2	Cre01.g042000	8.6
Cre11.g482700.t1.2	Cre01.g042050	8.6
Cre11.g482700.t1.2	Cre02.g103250	8.9
Cre11.g482700.t1.2	Cre01.g036300	9.3
Cre11.g482700.t1.2	Cre16.g684379	10
Cre12.g508150.t1.2	Cre12.g560450	0.0088
Cre12.g508150.t1.2	Cre07.g353450	0.16
Cre12.g508150.t1.2	Cre03.g146627	0.67
Cre12.g508150.t1.2	Cre05.g247400	1.3
Cre12.g508150.t1.2	Cre12.g557950	1.5
Cre12.g508150.t1.2	Cre11.g477050	1.6
Cre12.g508150.t1.2	Cre12.g489550	1.9
Cre12.g508150.t1.2	Cre12.g489500	1.9
Cre12.g508150.t1.2	Cre14.g609100	2.3
Cre12.g508150.t1.2	Cre10.g438950	2.4
Cre12.g508150.t1.2	Cre10.g439000	2.4
Cre12.g508150.t1.2	Cre03.g156150	4
Cre12.g508150.t1.2	Cre11.g467705	4.3
Cre12.g508150.t1.2	Cre03.g165450	4.4
Cre12.g508150.t1.2	Cre12.g491950	4.6
Cre12.g508150.t1.2	Cre17.g729250	7.1
Cre12.g508150.t1.2	Cre01.g053600	8.6
Cre12.g508150.t1.2	Cre01.g053550	8.6
Cre14.g620850.t1.2	Cre03.g177100	3.4
Cre14.g620850.t1.2	Cre09.g399450	6.5
Cre14.g620850.t1.2	Cre16.g684350	8.4
Cre14.g620850.t1.2	Cre12.g489800	9.9
Cre16.g672300.t1.2	Cre12.g507000	5.3e-08
Cre16.g672300.t1.2	Cre05.g233551	8.1e-08
Cre16.g672300.t1.2	Cre08.g364400	1.5e-07
Cre16.g672300.t1.2	Cre17.g736750	2.7e-07
Cre16.g672300.t1.2	Cre13.g566450	2.7e-07
Cre16.g672300.t1.2	Cre03.g144011	5.9e-07
Cre16.g672300.t1.2	Cre09.g398983	1.7e-06
Cre16.g672300.t1.2	Cre01.g051482	1.7e-06
Cre16.g672300.t1.2	Cre17.g742100	1.7e-06
Cre16.g672300.t1.2	Cre17.g742116	1.7e-06
Cre16.g672300.t1.2	Cre10.g417675	1.7e-06
Cre16.g672300.t1.2	Cre02.g116750	2e-06
Cre16.g672300.t1.2	Cre07.g329050	2.1e-06
Cre16.g672300.t1.2	Cre07.g321400	2.1e-06
Cre16.g672300.t1.2	Cre02.g078226	2.1e-06
Cre16.g672300.t1.2	Cre13.g575500	2.1e-06
Cre16.g672300.t1.2	Cre13.g575550	2.1e-06
Cre16.g672300.t1.2	Cre03.g160250	2.1e-06
Cre16.g672300.t1.2	Cre12.g559053	2.1e-06
Cre16.g672300.t1.2	Cre05.g233051	2.3e-06
Cre16.g672300.t1.2	Cre12.g515500	3.4e-06
Cre16.g672300.t1.2	Cre04.g223150	4.6e-06
Cre16.g672300.t1.2	Cre11.g478950	4.8e-06
Cre16.g672300.t1.2	Cre02.g090526	4.8e-06
Cre16.g672300.t1.2	Cre02.g088200	4.8e-06
Cre16.g672300.t1.2	Cre03.g179820	4.8e-06
Cre16.g672300.t1.2	Cre01.g018350	4.8e-06
Cre16.g672300.t1.2	Cre04.g226114	4.8e-06
Cre16.g672300.t1.2	Cre12.g554850	4.8e-06
Cre16.g672300.t1.2	Cre12.g484250	6.2e-06
Cre16.g672300.t1.2	Cre15.g635350	8.6e-06
Cre16.g672300.t1.2	Cre15.g635300	8.6e-06
Cre16.g672300.t1.2	Cre12.g537900	9.6e-06
Cre16.g672300.t1.2	Cre12.g537850	9.6e-06
Cre16.g672300.t1.2	Cre01.g020750	1e-05
Cre16.g672300.t1.2	Cre01.g020701	1e-05
Cre16.g672300.t1.2	Cre09.g413450	1.3e-05
Cre16.g672300.t1.2	Cre09.g394102	1.4e-05
Cre16.g672300.t1.2	Cre10.g434600	1.5e-05
Cre16.g672300.t1.2	Cre10.g434550	1.5e-05
Cre16.g672300.t1.2	Cre01.g030150	1.7e-05
Cre16.g672300.t1.2	Cre01.g053350	1.8e-05
Cre16.g672300.t1.2	Cre09.g387951	2e-05
Cre16.g672300.t1.2	Cre02.g092950	2e-05
Cre16.g672300.t1.2	Cre02.g092926	2e-05
Cre16.g672300.t1.2	Cre07.g325724	2.2e-05
Cre16.g672300.t1.2	Cre07.g325723	2.2e-05
Cre16.g672300.t1.2	Cre12.g488550	2.3e-05
Cre16.g672300.t1.2	Cre12.g488600	2.3e-05
Cre16.g672300.t1.2	Cre16.g673465	2.3e-05
Cre16.g672300.t1.2	Cre09.g386107	2.9e-05
Cre16.g672300.t1.2	Cre01.g072027	4e-05
Cre16.g672300.t1.2	Cre17.g733000	4e-05
Cre16.g672300.t1.2	Cre17.g732951	4e-05
Cre16.g672300.t1.2	Cre12.g539650	4.2e-05
Cre16.g672300.t1.2	Cre12.g537050	4.3e-05
Cre16.g672300.t1.2	Cre01.g041752	4.6e-05
Cre16.g672300.t1.2	Cre06.g271526	4.7e-05
Cre16.g672300.t1.2	Cre17.g705100	4.7e-05
Cre16.g672300.t1.2	Cre03.g143807	5.1e-05
Cre16.g672300.t1.2	Cre19.g750797	5.1e-05
Cre16.g672300.t1.2	Cre09.g399900	5.1e-05
Cre16.g672300.t1.2	Cre09.g399950	5.1e-05
Cre16.g672300.t1.2	Cre17.g735650	6.8e-05
Cre16.g672300.t1.2	Cre11.g467721	7.2e-05
Cre16.g672300.t1.2	Cre09.g392867	7.2e-05
Cre16.g672300.t1.2	Cre16.g687700	7.8e-05
Cre16.g672300.t1.2	Cre01.g012400	7.8e-05
Cre16.g672300.t1.2	Cre01.g012450	7.8e-05
Cre16.g672300.t1.2	Cre16.g689733	7.8e-05
Cre16.g672300.t1.2	Cre17.g719792	8.1e-05
Cre16.g672300.t1.2	Cre06.g269601	8.4e-05
Cre16.g672300.t1.2	Cre05.g243650	8.4e-05
Cre16.g672300.t1.2	Cre11.g467649	9e-05
Cre16.g672300.t1.2	Cre13.g565116	0.0001
Cre16.g672300.t1.2	Cre15.g637315	0.0001
Cre16.g672300.t1.2	Cre12.g514900	0.00012
Cre16.g672300.t1.2	Cre13.g585200	0.00014
Cre16.g672300.t1.2	Cre17.g712126	0.00015
Cre16.g672300.t1.2	Cre09.g399812	0.00015
Cre16.g672300.t1.2	Cre02.g142727	0.00018
Cre16.g672300.t1.2	Cre02.g078251	0.00018
Cre16.g672300.t1.2	Cre12.g550553	0.00019
Cre16.g672300.t1.2	Cre10.g466100	0.00019
Cre16.g672300.t1.2	Cre09.g416150	0.00019
Cre16.g672300.t1.2	Cre06.g290676	0.00019
Cre16.g672300.t1.2	Cre06.g254240	0.00019
Cre16.g672300.t1.2	Cre15.g637150	0.00019
Cre16.g672300.t1.2	Cre06.g278134	0.00021
Cre16.g672300.t1.2	Cre02.g089950	0.00021
Cre16.g672300.t1.2	Cre02.g090000	0.00021
Cre16.g672300.t1.2	Cre10.g444900	0.00021
Cre16.g672300.t1.2	Cre12.g506750	0.00022
Cre16.g672300.t1.2	Cre12.g483600	0.00023
Cre16.g672300.t1.2	Cre08.g373450	0.00023
Cre16.g672300.t1.2	Cre16.g670200	0.00023
Cre16.g672300.t1.2	Cre16.g670150	0.00023
Cre16.g672300.t1.2	Cre09.g416650	0.00024
Cre16.g672300.t1.2	Cre06.g301806	0.00026
Cre16.g672300.t1.2	Cre03.g146647	0.00026
Cre16.g672300.t1.2	Cre01.g001600	0.00027
Cre16.g672300.t1.2	Cre02.g091950	0.00028
Cre16.g672300.t1.2	Cre17.g734250	0.00029
Cre16.g672300.t1.2	Cre05.g237450	0.00029
Cre16.g672300.t1.2	Cre09.g399849	0.00031
Cre16.g672300.t1.2	Cre07.g347700	0.00032
Cre16.g672300.t1.2	Cre07.g347650	0.00032
Cre16.g672300.t1.2	Cre13.g607300	0.00036
Cre16.g672300.t1.2	Cre01.g019300	0.00041
Cre16.g672300.t1.2	Cre12.g549002	0.00043
Cre16.g672300.t1.2	Cre06.g289426	0.00047
Cre16.g672300.t1.2	Cre09.g401404	0.0005
Cre16.g672300.t1.2	Cre06.g299900	0.00051
Cre16.g672300.t1.2	Cre17.g745047	0.00056
Cre16.g672300.t1.2	Cre10.g449020	0.00058
Cre16.g672300.t1.2	Cre12.g483476	0.00059
Cre16.g672300.t1.2	Cre17.g714450	0.0006
Cre16.g672300.t1.2	Cre09.g389400	0.00064
Cre16.g672300.t1.2	Cre09.g389350	0.00064
Cre16.g672300.t1.2	Cre06.g259476	0.00065
Cre16.g672300.t1.2	Cre14.g617002	0.00069
Cre16.g672300.t1.2	Cre14.g617027	0.00069
Cre16.g672300.t1.2	Cre01.g016542	0.00086
Cre16.g672300.t1.2	Cre14.g608600	0.00087
Cre16.g672300.t1.2	Cre16.g678650	0.00087
Cre16.g672300.t1.2	Cre17.g743997	0.00087
Cre16.g672300.t1.2	Cre03.g174500	0.00087
Cre16.g672300.t1.2	Cre07.g343101	0.00091
Cre16.g672300.t1.2	Cre14.g628752	0.00091
Cre16.g672300.t1.2	Cre16.g689450	0.00091
Cre16.g672300.t1.2	Cre09.g398250	0.00091
Cre16.g672300.t1.2	Cre09.g400849	0.00091
Cre16.g672300.t1.2	Cre02.g141486	0.00091
Cre16.g672300.t1.2	Cre03.g144144	0.00091
Cre16.g672300.t1.2	Cre04.g217700	0.00091
Cre16.g672300.t1.2	Cre02.g142566	0.00092
Cre16.g672300.t1.2	Cre09.g406350	0.00093
Cre16.g672300.t1.2	Cre06.g252576	0.00097
Cre16.g672300.t1.2	Cre20.g751447	0.00099
Cre16.g672300.t1.2	Cre02.g141351	0.001
Cre16.g672300.t1.2	Cre02.g141250	0.001
Cre16.g672300.t1.2	Cre07.g330250	0.0011
Cre16.g672300.t1.2	Cre07.g330200	0.0011
Cre16.g672300.t1.2	Cre07.g356950	0.0011
Cre16.g672300.t1.2	Cre10.g427896	0.0011
Cre16.g672300.t1.2	Cre06.g287100	0.0012
Cre16.g672300.t1.2	Cre06.g287150	0.0012
Cre16.g672300.t1.2	Cre09.g398178	0.0012
Cre16.g672300.t1.2	Cre05.g230804	0.0013
Cre16.g672300.t1.2	Cre05.g238724	0.0013
Cre16.g672300.t1.2	Cre06.g310601	0.0014
Cre16.g672300.t1.2	Cre01.g016500	0.0014
Cre16.g672300.t1.2	Cre05.g235650	0.0014
Cre16.g672300.t1.2	Cre12.g510250	0.0014
Cre16.g672300.t1.2	Cre13.g565083	0.0014
Cre16.g672300.t1.2	Cre12.g513650	0.0015
Cre16.g672300.t1.2	Cre01.g044650	0.0016
Cre16.g672300.t1.2	Cre08.g370850	0.0016
Cre16.g672300.t1.2	Cre02.g120250	0.0017
Cre16.g672300.t1.2	Cre06.g308533	0.0017
Cre16.g672300.t1.2	Cre01.g005300	0.0021
Cre16.g672300.t1.2	Cre08.g358541	0.0023
Cre16.g672300.t1.2	Cre07.g317400	0.0024
Cre16.g672300.t1.2	Cre11.g469800	0.0024
Cre16.g672300.t1.2	Cre02.g095117	0.0025
Cre16.g672300.t1.2	Cre11.g481700	0.0026
Cre16.g672300.t1.2	Cre06.g260900	0.0026
Cre16.g672300.t1.2	Cre08.g358565	0.0027
Cre16.g672300.t1.2	Cre07.g323300	0.0027
Cre16.g672300.t1.2	Cre02.g076663	0.0028
Cre16.g672300.t1.2	Cre02.g142650	0.003
Cre16.g672300.t1.2	Cre02.g074626	0.0032
Cre16.g672300.t1.2	Cre10.g432900	0.0033
Cre16.g672300.t1.2	Cre10.g432850	0.0033
Cre16.g672300.t1.2	Cre17.g741272	0.0034
Cre16.g672300.t1.2	Cre12.g518350	0.0035
Cre16.g672300.t1.2	Cre12.g518400	0.0035
Cre16.g672300.t1.2	Cre01.g043500	0.0039
Cre16.g672300.t1.2	Cre12.g501403	0.0043
Cre16.g672300.t1.2	Cre15.g636004	0.0044
Cre16.g672300.t1.2	Cre15.g640900	0.0044
Cre16.g672300.t1.2	Cre03.g194900	0.0044
Cre16.g672300.t1.2	Cre11.g483351	0.0046
Cre16.g672300.t1.2	Cre01.g006614	0.0049
Cre16.g672300.t1.2	Cre17.g707850	0.0049
Cre16.g672300.t1.2	Cre09.g397845	0.0053
Cre16.g672300.t1.2	Cre02.g109300	0.0056
Cre16.g672300.t1.2	Cre07.g341251	0.0056
Cre16.g672300.t1.2	Cre42.g760447	0.0056
Cre16.g672300.t1.2	Cre09.g411150	0.0056
Cre16.g672300.t1.2	Cre03.g175750	0.0056
Cre16.g672300.t1.2	Cre12.g507550	0.0056
Cre16.g672300.t1.2	Cre12.g542550	0.0056
Cre16.g672300.t1.2	Cre07.g312600	0.0059
Cre16.g672300.t1.2	Cre07.g337933	0.006
Cre16.g672300.t1.2	Cre07.g343600	0.0061
Cre16.g672300.t1.2	Cre09.g386755	0.0061
Cre16.g672300.t1.2	Cre08.g372650	0.0062
Cre16.g672300.t1.2	Cre09.g404950	0.0062
Cre16.g672300.t1.2	Cre10.g422419	0.0062
Cre16.g672300.t1.2	Cre10.g431900	0.0063
Cre16.g672300.t1.2	Cre10.g431850	0.0063
Cre16.g672300.t1.2	Cre02.g142046	0.0065
Cre16.g672300.t1.2	Cre13.g577850	0.0071
Cre16.g672300.t1.2	Cre10.g457297	0.0073
Cre16.g672300.t1.2	Cre10.g457262	0.0073
Cre16.g672300.t1.2	Cre02.g074217	0.0074
Cre16.g672300.t1.2	Cre10.g437601	0.0075
Cre16.g672300.t1.2	Cre12.g498600	0.0078
Cre16.g672300.t1.2	Cre01.g023650	0.0079
Cre16.g672300.t1.2	Cre08.g358450	0.0082
Cre16.g672300.t1.2	Cre12.g561300	0.0085
Cre16.g672300.t1.2	Cre01.g042502	0.0087
Cre16.g672300.t1.2	Cre08.g382500	0.0088
Cre16.g672300.t1.2	Cre16.g680650	0.0088
Cre16.g672300.t1.2	Cre17.g731600	0.0088
Cre16.g672300.t1.2	Cre17.g731591	0.0088
Cre16.g672300.t1.2	Cre02.g086456	0.0089
Cre16.g672300.t1.2	Cre10.g434150	0.009
Cre16.g672300.t1.2	Cre10.g420550	0.009
Cre16.g672300.t1.2	Cre10.g420537	0.009
Cre16.g672300.t1.2	Cre16.g665650	0.0097
Cre16.g672300.t1.2	Cre06.g255550	0.0098
Cre16.g672300.t1.2	Cre16.g651300	0.01
Cre16.g672300.t1.2	Cre01.g071662	0.01
Cre16.g672300.t1.2	Cre01.g071297	0.01
Cre16.g672300.t1.2	Cre05.g233050	0.011
Cre16.g672300.t1.2	Cre03.g205585	0.011
Cre16.g672300.t1.2	Cre18.g749497	0.012
Cre16.g672300.t1.2	Cre18.g749447	0.012
Cre16.g672300.t1.2	Cre02.g073900	0.012
Cre16.g672300.t1.2	Cre12.g532900	0.012
Cre16.g672300.t1.2	Cre11.g468362	0.012
Cre16.g672300.t1.2	Cre03.g146887	0.013
Cre16.g672300.t1.2	Cre09.g410750	0.013
Cre16.g672300.t1.2	Cre11.g467663	0.014
Cre16.g672300.t1.2	Cre06.g257450	0.014
Cre16.g672300.t1.2	Cre17.g703932	0.014
Cre16.g672300.t1.2	Cre17.g703950	0.014
Cre16.g672300.t1.2	Cre06.g289300	0.014
Cre16.g672300.t1.2	Cre06.g289200	0.014
Cre16.g672300.t1.2	Cre17.g744047	0.014
Cre16.g672300.t1.2	Cre12.g539850	0.014
Cre16.g672300.t1.2	Cre11.g467620	0.014
Cre16.g672300.t1.2	Cre16.g664850	0.014
Cre16.g672300.t1.2	Cre03.g153306	0.014
Cre16.g672300.t1.2	Cre04.g231418	0.015
Cre16.g672300.t1.2	Cre17.g724873	0.015
Cre16.g672300.t1.2	Cre15.g638550	0.015
Cre16.g672300.t1.2	Cre10.g442950	0.015
Cre16.g672300.t1.2	Cre12.g539161	0.016
Cre16.g672300.t1.2	Cre04.g211600	0.016
Cre16.g672300.t1.2	Cre04.g211599	0.016
Cre16.g672300.t1.2	Cre02.g083273	0.016
Cre16.g672300.t1.2	Cre03.g210065	0.017
Cre16.g672300.t1.2	Cre03.g210177	0.017
Cre16.g672300.t1.2	Cre08.g373374	0.018
Cre16.g672300.t1.2	Cre16.g666627	0.018
Cre16.g672300.t1.2	Cre09.g400034	0.018
Cre16.g672300.t1.2	Cre06.g278286	0.018
Cre16.g672300.t1.2	Cre06.g278301	0.018
Cre16.g672300.t1.2	Cre02.g095036	0.018
Cre16.g672300.t1.2	Cre27.g757447	0.018
Cre16.g672300.t1.2	Cre01.g006600	0.018
Cre16.g672300.t1.2	Cre10.g445299	0.018
Cre16.g672300.t1.2	Cre10.g445226	0.018
Cre16.g672300.t1.2	Cre10.g445251	0.018
Cre16.g672300.t1.2	Cre04.g217986	0.018
Cre16.g672300.t1.2	Cre12.g539205	0.018
Cre16.g672300.t1.2	Cre04.g229300	0.018
Cre16.g672300.t1.2	Cre09.g416309	0.019
Cre16.g672300.t1.2	Cre01.g042650	0.019
Cre16.g672300.t1.2	Cre12.g528100	0.02
Cre16.g672300.t1.2	Cre02.g147300	0.021
Cre16.g672300.t1.2	Cre11.g467529	0.022
Cre16.g672300.t1.2	Cre10.g422450	0.022
Cre16.g672300.t1.2	Cre07.g312002	0.022
Cre16.g672300.t1.2	Cre13.g590450	0.022
Cre16.g672300.t1.2	Cre01.g023300	0.022
Cre16.g672300.t1.2	Cre16.g654450	0.022
Cre16.g672300.t1.2	Cre07.g353650	0.024
Cre16.g672300.t1.2	Cre07.g353600	0.024
Cre16.g672300.t1.2	Cre16.g695200	0.024
Cre16.g672300.t1.2	Cre03.g150101	0.024
Cre16.g672300.t1.2	Cre17.g696900	0.025
Cre16.g672300.t1.2	Cre13.g567700	0.025
Cre16.g672300.t1.2	Cre10.g445371	0.026
Cre16.g672300.t1.2	Cre04.g217987	0.026
Cre16.g672300.t1.2	Cre04.g217988	0.026
Cre16.g672300.t1.2	Cre05.g245350	0.027
Cre16.g672300.t1.2	Cre09.g389809	0.028
Cre16.g672300.t1.2	Cre12.g511400	0.028
Cre16.g672300.t1.2	Cre18.g748547	0.028
Cre16.g672300.t1.2	Cre09.g415350	0.029
Cre16.g672300.t1.2	Cre03.g193550	0.031
Cre16.g672300.t1.2	Cre12.g528600	0.033
Cre16.g672300.t1.2	Cre01.g006202	0.033
Cre16.g672300.t1.2	Cre09.g403950	0.034
Cre16.g672300.t1.2	Cre03.g200850	0.035
Cre16.g672300.t1.2	Cre17.g733752	0.035
Cre16.g672300.t1.2	Cre08.g358546	0.036
Cre16.g672300.t1.2	Cre08.g371751	0.036
Cre16.g672300.t1.2	Cre12.g558526	0.036
Cre16.g672300.t1.2	Cre10.g439550	0.037
Cre16.g672300.t1.2	Cre09.g386753	0.04
Cre16.g672300.t1.2	Cre09.g386754	0.04
Cre16.g672300.t1.2	Cre16.g678885	0.04
Cre16.g672300.t1.2	Cre24.g755247	0.04
Cre16.g672300.t1.2	Cre15.g642376	0.041
Cre16.g672300.t1.2	Cre06.g290950	0.041
Cre16.g672300.t1.2	Cre06.g278190	0.042
Cre16.g672300.t1.2	Cre11.g478350	0.043
Cre16.g672300.t1.2	Cre21.g752897	0.046
Cre16.g672300.t1.2	Cre04.g231124	0.046
Cre16.g672300.t1.2	Cre04.g214209	0.046
Cre16.g672300.t1.2	Cre04.g214097	0.046
Cre16.g672300.t1.2	Cre09.g411400	0.046
Cre16.g672300.t1.2	Cre05.g238200	0.048
Cre16.g672300.t1.2	Cre02.g144606	0.048
Cre16.g672300.t1.2	Cre02.g144550	0.048
Cre16.g672300.t1.2	Cre06.g255700	0.05
Cre16.g672300.t1.2	Cre03.g206550	0.05
Cre16.g672300.t1.2	Cre02.g087800	0.05
Cre16.g672300.t1.2	Cre12.g494052	0.051
Cre16.g672300.t1.2	Cre02.g074474	0.052
Cre16.g672300.t1.2	Cre16.g667200	0.052
Cre16.g672300.t1.2	Cre09.g386743	0.053
Cre16.g672300.t1.2	Cre03.g155976	0.054
Cre16.g672300.t1.2	Cre03.g155950	0.054
Cre16.g672300.t1.2	Cre06.g310150	0.055
Cre16.g672300.t1.2	Cre17.g716613	0.057
Cre16.g672300.t1.2	Cre17.g716625	0.057
Cre16.g672300.t1.2	Cre07.g349650	0.058
Cre16.g672300.t1.2	Cre17.g740323	0.058
Cre16.g672300.t1.2	Cre11.g467578	0.058
Cre16.g672300.t1.2	Cre06.g250902	0.06
Cre16.g672300.t1.2	Cre03.g198850	0.06
Cre16.g672300.t1.2	Cre03.g153650	0.067
Cre16.g672300.t1.2	Cre03.g153600	0.067
Cre16.g672300.t1.2	Cre09.g391726	0.068
Cre16.g672300.t1.2	Cre01.g043300	0.068
Cre16.g672300.t1.2	Cre09.g389986	0.069
Cre16.g672300.t1.2	Cre06.g309900	0.073
Cre16.g672300.t1.2	Cre03.g200450	0.074
Cre16.g672300.t1.2	Cre17.g710950	0.075
Cre16.g672300.t1.2	Cre17.g710900	0.075
Cre16.g672300.t1.2	Cre07.g331600	0.078
Cre16.g672300.t1.2	Cre09.g394350	0.078
Cre16.g672300.t1.2	Cre02.g115508	0.078
Cre16.g672300.t1.2	Cre09.g401626	0.081
Cre16.g672300.t1.2	Cre09.g411666	0.081
Cre16.g672300.t1.2	Cre09.g389050	0.082
Cre16.g672300.t1.2	Cre08.g379500	0.085
Cre16.g672300.t1.2	Cre03.g156650	0.087
Cre16.g672300.t1.2	Cre09.g399000	0.088
Cre16.g672300.t1.2	Cre09.g398950	0.088
Cre16.g672300.t1.2	Cre08.g373300	0.089
Cre16.g672300.t1.2	Cre14.g614650	0.089
Cre16.g672300.t1.2	Cre14.g614667	0.089
Cre16.g672300.t1.2	Cre10.g452850	0.09
Cre16.g672300.t1.2	Cre01.g001700	0.092
Cre16.g672300.t1.2	Cre11.g467530	0.093
Cre16.g672300.t1.2	Cre12.g489300	0.093
Cre16.g672300.t1.2	Cre13.g572350	0.094
Cre16.g672300.t1.2	Cre13.g572375	0.094
Cre16.g672300.t1.2	Cre02.g079004	0.097
Cre16.g672300.t1.2	Cre05.g236500	0.097
Cre16.g672300.t1.2	Cre05.g236450	0.097
Cre16.g672300.t1.2	Cre17.g738000	0.099
Cre16.g672300.t1.2	Cre01.g004400	0.099
Cre16.g672300.t1.2	Cre16.g689199	0.1
Cre16.g672300.t1.2	Cre06.g259900	0.1
Cre16.g672300.t1.2	Cre10.g454150	0.1
Cre16.g672300.t1.2	Cre14.g630775	0.1
Cre16.g672300.t1.2	Cre12.g515450	0.11
Cre16.g672300.t1.2	Cre02.g095153	0.11
Cre16.g672300.t1.2	Cre13.g576433	0.11
Cre16.g672300.t1.2	Cre13.g576466	0.11
Cre16.g672300.t1.2	Cre07.g327950	0.11
Cre16.g672300.t1.2	Cre06.g291250	0.11
Cre16.g672300.t1.2	Cre06.g291300	0.11
Cre16.g672300.t1.2	Cre16.g677738	0.11
Cre16.g672300.t1.2	Cre09.g398771	0.11
Cre16.g672300.t1.2	Cre12.g520500	0.11
Cre16.g672300.t1.2	Cre12.g520450	0.11
Cre16.g672300.t1.2	Cre13.g603850	0.12
Cre16.g672300.t1.2	Cre08.g373350	0.12
Cre16.g672300.t1.2	Cre14.g622270	0.12
Cre16.g672300.t1.2	Cre27.g757397	0.12
Cre16.g672300.t1.2	Cre21.g753097	0.12
Cre16.g672300.t1.2	Cre12.g530200	0.12
Cre16.g672300.t1.2	Cre14.g615300	0.12
Cre16.g672300.t1.2	Cre14.g615350	0.12
Cre16.g672300.t1.2	Cre21.g753197	0.13
Cre16.g672300.t1.2	Cre07.g344800	0.13
Cre16.g672300.t1.2	Cre06.g301725	0.13
Cre16.g672300.t1.2	Cre12.g550450	0.14
Cre16.g672300.t1.2	Cre12.g550501	0.14
Cre16.g672300.t1.2	Cre01.g014600	0.14
Cre16.g672300.t1.2	Cre08.g380250	0.14
Cre16.g672300.t1.2	Cre01.g041700	0.15
Cre16.g672300.t1.2	Cre06.g254450	0.15
Cre16.g672300.t1.2	Cre12.g552005	0.15
Cre16.g672300.t1.2	Cre02.g106600	0.15
Cre16.g672300.t1.2	Cre06.g261026	0.15
Cre16.g672300.t1.2	Cre05.g246800	0.16
Cre16.g672300.t1.2	Cre01.g013900	0.16
Cre16.g672300.t1.2	Cre07.g354700	0.16
Cre16.g672300.t1.2	Cre10.g424700	0.16
Cre16.g672300.t1.2	Cre10.g465757	0.16
Cre16.g672300.t1.2	Cre03.g148500	0.16
Cre16.g672300.t1.2	Cre03.g148450	0.16
Cre16.g672300.t1.2	Cre17.g742932	0.17
Cre16.g672300.t1.2	Cre10.g464300	0.18
Cre16.g672300.t1.2	Cre14.g612800	0.18
Cre16.g672300.t1.2	Cre02.g113450	0.18
Cre16.g672300.t1.2	Cre01.g041650	0.18
Cre16.g672300.t1.2	Cre01.g041667	0.18
Cre16.g672300.t1.2	Cre02.g089600	0.18
Cre16.g672300.t1.2	Cre04.g226700	0.18
Cre16.g672300.t1.2	Cre07.g312150	0.18
Cre16.g672300.t1.2	Cre19.g750597	0.19
Cre16.g672300.t1.2	Cre05.g232454	0.19
Cre16.g672300.t1.2	Cre01.g030968	0.19
Cre16.g672300.t1.2	Cre13.g583787	0.2
Cre16.g672300.t1.2	Cre06.g278285	0.2
Cre16.g672300.t1.2	Cre15.g641282	0.2
Cre16.g672300.t1.2	Cre01.g041100	0.2
Cre16.g672300.t1.2	Cre14.g621400	0.2
Cre16.g672300.t1.2	Cre16.g655430	0.2
Cre16.g672300.t1.2	Cre06.g264100	0.21
Cre16.g672300.t1.2	Cre07.g335250	0.21
Cre16.g672300.t1.2	Cre03.g194050	0.21
Cre16.g672300.t1.2	Cre02.g142226	0.23
Cre16.g672300.t1.2	Cre05.g231100	0.23
Cre16.g672300.t1.2	Cre05.g231050	0.23
Cre16.g672300.t1.2	Cre17.g728350	0.23
Cre16.g672300.t1.2	Cre17.g728300	0.23
Cre16.g672300.t1.2	Cre06.g278291	0.24
Cre16.g672300.t1.2	Cre03.g148250	0.24
Cre16.g672300.t1.2	Cre09.g386739	0.25
Cre16.g672300.t1.2	Cre12.g520800	0.25
Cre16.g672300.t1.2	Cre04.g220000	0.25
Cre16.g672300.t1.2	Cre17.g741650	0.25
Cre16.g672300.t1.2	Cre06.g278104	0.26
Cre16.g672300.t1.2	Cre06.g278105	0.26
Cre16.g672300.t1.2	Cre13.g568050	0.26
Cre16.g672300.t1.2	Cre16.g687050	0.27
Cre16.g672300.t1.2	Cre12.g492250	0.27
Cre16.g672300.t1.2	Cre12.g492200	0.27
Cre16.g672300.t1.2	Cre17.g713575	0.27
Cre16.g672300.t1.2	Cre07.g346917	0.27
Cre16.g672300.t1.2	Cre09.g386300	0.28
Cre16.g672300.t1.2	Cre01.g007051	0.28
Cre16.g672300.t1.2	Cre45.g760797	0.28
Cre16.g672300.t1.2	Cre22.g753397	0.29
Cre16.g672300.t1.2	Cre08.g373414	0.31
Cre16.g672300.t1.2	Cre06.g289950	0.32
Cre16.g672300.t1.2	Cre03.g204450	0.32
Cre16.g672300.t1.2	Cre16.g677026	0.32
Cre16.g672300.t1.2	Cre01.g010300	0.32
Cre16.g672300.t1.2	Cre12.g484834	0.33
Cre16.g672300.t1.2	Cre12.g484800	0.33
Cre16.g672300.t1.2	Cre09.g416750	0.33
Cre16.g672300.t1.2	Cre03.g163550	0.33
Cre16.g672300.t1.2	Cre03.g163600	0.33
Cre16.g672300.t1.2	Cre17.g735876	0.34
Cre16.g672300.t1.2	Cre11.g478128	0.34
Cre16.g672300.t1.2	Cre11.g478100	0.34
Cre16.g672300.t1.2	Cre04.g229026	0.35
Cre16.g672300.t1.2	Cre03.g149400	0.35
Cre16.g672300.t1.2	Cre09.g388763	0.35
Cre16.g672300.t1.2	Cre12.g539208	0.35
Cre16.g672300.t1.2	Cre03.g194100	0.35
Cre16.g672300.t1.2	Cre09.g401589	0.36
Cre16.g672300.t1.2	Cre01.g038400	0.36
Cre16.g672300.t1.2	Cre16.g658775	0.36
Cre16.g672300.t1.2	Cre01.g001685	0.37
Cre16.g672300.t1.2	Cre13.g573550	0.37
Cre16.g672300.t1.2	Cre02.g118400	0.37
Cre16.g672300.t1.2	Cre17.g698100	0.37
Cre16.g672300.t1.2	Cre17.g744497	0.37
Cre16.g672300.t1.2	Cre06.g294400	0.38
Cre16.g672300.t1.2	Cre16.g679109	0.39
Cre16.g672300.t1.2	Cre06.g278179	0.39
Cre16.g672300.t1.2	Cre02.g095112	0.39
Cre16.g672300.t1.2	Cre14.g630763	0.4
Cre16.g672300.t1.2	Cre16.g688633	0.4
Cre16.g672300.t1.2	Cre06.g270500	0.4
Cre16.g672300.t1.2	Cre12.g528750	0.41
Cre16.g672300.t1.2	Cre02.g115650	0.41
Cre16.g672300.t1.2	Cre07.g352251	0.42
Cre16.g672300.t1.2	Cre07.g352300	0.42
Cre16.g672300.t1.2	Cre02.g099550	0.43
Cre16.g672300.t1.2	Cre11.g467784	0.44
Cre16.g672300.t1.2	Cre10.g465550	0.46
Cre16.g672300.t1.2	Cre03.g205350	0.46
Cre16.g672300.t1.2	Cre03.g205400	0.46
Cre16.g672300.t1.2	Cre10.g461000	0.47
Cre16.g672300.t1.2	Cre09.g387986	0.48
Cre16.g672300.t1.2	Cre17.g746497	0.49
Cre16.g672300.t1.2	Cre02.g142346	0.49
Cre16.g672300.t1.2	Cre12.g495958	0.49
Cre16.g672300.t1.2	Cre01.g030550	0.49
Cre16.g672300.t1.2	Cre01.g044550	0.5
[truncated: 1,453 more rows]

## Sheet: Targets evalue ≤1
Table S2. C. reinhardtii targets for the Transcription Factors and Transcriptional Regulators homologs identified in A. thaliana
Columns indicate: Transcription factor ID, Target ID, hit e-value
Transcription Factor	Target	Hit e-value
Cre03.g152150.t1.2	Cre09.g396800	0.35
Cre03.g152150.t1.2	Cre02.g142987	0.57
Cre03.g152150.t1.2	Cre45.g760847	0.76
Cre03.g176651.t1.1	Cre08.g377100	0.041
Cre03.g176651.t1.1	Cre08.g377150	0.041
Cre03.g176651.t1.1	Cre05.g244200	0.048
Cre03.g176651.t1.1	Cre09.g387500	0.13
Cre03.g176651.t1.1	Cre06.g307900	0.51
Cre03.g176651.t1.1	Cre06.g307850	0.51
Cre03.g176651.t1.1	Cre14.g632759	0.55
Cre03.g176651.t1.1	Cre14.g632767	0.55
Cre03.g176651.t1.1	Cre11.g467650	0.55
Cre03.g176651.t1.1	Cre09.g386747	0.59
Cre03.g176651.t1.1	Cre07.g336200	0.67
Cre03.g197350.t1.2	Cre06.g250000	0.00055
Cre03.g197350.t1.2	Cre08.g358527	0.00066
Cre03.g197350.t1.2	Cre01.g011300	0.00097
Cre03.g197350.t1.2	Cre06.g274950	0.002
Cre03.g197350.t1.2	Cre03.g178400	0.0024
Cre03.g197350.t1.2	Cre09.g397250	0.0063
Cre03.g197350.t1.2	Cre17.g725900	0.0064
Cre03.g197350.t1.2	Cre17.g725950	0.0064
Cre03.g197350.t1.2	Cre11.g467743	0.0067
Cre03.g197350.t1.2	Cre05.g240350	0.015
Cre03.g197350.t1.2	Cre05.g240300	0.015
Cre03.g197350.t1.2	Cre08.g369740	0.02
Cre03.g197350.t1.2	Cre08.g369800	0.02
Cre03.g197350.t1.2	Cre08.g381800	0.02
Cre03.g197350.t1.2	Cre06.g258250	0.024
Cre03.g197350.t1.2	Cre08.g363267	0.026
Cre03.g197350.t1.2	Cre08.g363283	0.026
Cre03.g197350.t1.2	Cre16.g679221	0.033
Cre03.g197350.t1.2	Cre16.g667300	0.033
Cre03.g197350.t1.2	Cre09.g398554	0.033
Cre03.g197350.t1.2	Cre09.g398555	0.033
Cre03.g197350.t1.2	Cre06.g302900	0.033
Cre03.g197350.t1.2	Cre06.g302950	0.033
Cre03.g197350.t1.2	Cre03.g145307	0.033
Cre03.g197350.t1.2	Cre03.g145287	0.033
Cre03.g197350.t1.2	Cre12.g533500	0.033
Cre03.g197350.t1.2	Cre11.g467611	0.04
Cre03.g197350.t1.2	Cre03.g208161	0.049
Cre03.g197350.t1.2	Cre03.g199983	0.05
Cre03.g197350.t1.2	Cre03.g200095	0.05
Cre03.g197350.t1.2	Cre17.g747497	0.06
Cre03.g197350.t1.2	Cre02.g105500	0.062
Cre03.g197350.t1.2	Cre11.g467785	0.072
Cre03.g197350.t1.2	Cre16.g677877	0.077
Cre03.g197350.t1.2	Cre16.g677989	0.077
Cre03.g197350.t1.2	Cre08.g360100	0.095
Cre03.g197350.t1.2	Cre08.g360050	0.095
Cre03.g197350.t1.2	Cre06.g290150	0.1
Cre03.g197350.t1.2	Cre06.g290100	0.1
Cre03.g197350.t1.2	Cre09.g404450	0.1
Cre03.g197350.t1.2	Cre04.g219500	0.1
Cre03.g197350.t1.2	Cre03.g195100	0.11
Cre03.g197350.t1.2	Cre13.g569801	0.12
Cre03.g197350.t1.2	Cre11.g468650	0.12
Cre03.g197350.t1.2	Cre06.g261600	0.14
Cre03.g197350.t1.2	Cre08.g358525	0.15
Cre03.g197350.t1.2	Cre06.g254850	0.15
Cre03.g197350.t1.2	Cre06.g254917	0.15
Cre03.g197350.t1.2	Cre02.g143801	0.15
Cre03.g197350.t1.2	Cre02.g102050	0.15
Cre03.g197350.t1.2	Cre10.g465226	0.15
Cre03.g197350.t1.2	Cre12.g517750	0.15
Cre03.g197350.t1.2	Cre11.g467538	0.15
Cre03.g197350.t1.2	Cre14.g624650	0.15
Cre03.g197350.t1.2	Cre14.g624700	0.15
Cre03.g197350.t1.2	Cre07.g317908	0.16
Cre03.g197350.t1.2	Cre03.g200767	0.19
Cre03.g197350.t1.2	Cre11.g475500	0.21
Cre03.g197350.t1.2	Cre13.g605850	0.23
Cre03.g197350.t1.2	Cre13.g605900	0.23
Cre03.g197350.t1.2	Cre14.g625300	0.25
Cre03.g197350.t1.2	Cre14.g629050	0.3
Cre03.g197350.t1.2	Cre16.g691888	0.3
Cre03.g197350.t1.2	Cre05.g241640	0.3
Cre03.g197350.t1.2	Cre05.g241641	0.3
Cre03.g197350.t1.2	Cre01.g023600	0.3
Cre03.g197350.t1.2	Cre02.g119600	0.3
Cre03.g197350.t1.2	Cre06.g272000	0.31
Cre03.g197350.t1.2	Cre14.g621100	0.31
Cre03.g197350.t1.2	Cre07.g325746	0.39
Cre03.g197350.t1.2	Cre07.g325745	0.39
Cre03.g197350.t1.2	Cre01.g018184	0.4
Cre03.g197350.t1.2	Cre17.g698600	0.44
Cre03.g197350.t1.2	Cre12.g543300	0.45
Cre03.g197350.t1.2	Cre12.g543350	0.45
Cre03.g197350.t1.2	Cre08.g373100	0.47
Cre03.g197350.t1.2	Cre01.g025850	0.47
Cre03.g197350.t1.2	Cre08.g363300	0.47
Cre03.g197350.t1.2	Cre08.g363350	0.47
Cre03.g197350.t1.2	Cre13.g569550	0.5
Cre03.g197350.t1.2	Cre14.g617650	0.53
Cre03.g197350.t1.2	Cre01.g041200	0.56
Cre03.g197350.t1.2	Cre10.g465500	0.59
Cre03.g197350.t1.2	Cre03.g176200	0.59
Cre03.g197350.t1.2	Cre03.g176250	0.59
Cre03.g197350.t1.2	Cre16.g673400	0.6
Cre03.g197350.t1.2	Cre09.g386734	0.65
Cre03.g197350.t1.2	Cre03.g208306	0.66
Cre03.g197350.t1.2	Cre09.g395000	0.68
Cre03.g197350.t1.2	Cre09.g395050	0.68
Cre03.g197350.t1.2	Cre08.g376300	0.68
Cre03.g197350.t1.2	Cre10.g461950	0.71
Cre03.g197350.t1.2	Cre10.g462000	0.71
Cre03.g197350.t1.2	Cre05.g234640	0.72
Cre03.g197350.t1.2	Cre05.g234641	0.72
Cre03.g197350.t1.2	Cre04.g225600	0.73
Cre03.g197350.t1.2	Cre06.g300001	0.77
Cre03.g197350.t1.2	Cre07.g324600	0.79
Cre03.g197350.t1.2	Cre07.g324550	0.79
Cre03.g197350.t1.2	Cre08.g358200	0.8
Cre03.g197350.t1.2	Cre02.g146400	0.81
Cre03.g197350.t1.2	Cre06.g311650	0.83
Cre03.g197350.t1.2	Cre03.g143807	0.83
Cre03.g197350.t1.2	Cre01.g042300	0.83
Cre03.g197350.t1.2	Cre04.g226138	0.83
Cre03.g197350.t1.2	Cre08.g378100	0.87
Cre03.g197350.t1.2	Cre02.g091600	0.94
Cre03.g197350.t1.2	Cre02.g076000	1
Cre03.g197350.t1.2	Cre08.g363250	1
Cre03.g197350.t1.2	Cre11.g476700	1
Cre03.g197350.t1.2	Cre02.g088551	1
Cre03.g197350.t1.2	Cre01.g055500	1
Cre03.g197350.t1.2	Cre02.g094250	1
Cre03.g197350.t1.2	Cre16.g676000	1
Cre03.g197350.t1.2	Cre16.g676050	1
Cre06.g261450.t1.2	Cre12.g507000	5.3e-08
Cre06.g261450.t1.2	Cre05.g233551	8.1e-08
Cre06.g261450.t1.2	Cre08.g364400	1.5e-07
Cre06.g261450.t1.2	Cre17.g736750	2.7e-07
Cre06.g261450.t1.2	Cre13.g566450	2.7e-07
Cre06.g261450.t1.2	Cre03.g144011	5.9e-07
Cre06.g261450.t1.2	Cre09.g398983	1.7e-06
Cre06.g261450.t1.2	Cre01.g051482	1.7e-06
Cre06.g261450.t1.2	Cre17.g742100	1.7e-06
Cre06.g261450.t1.2	Cre17.g742116	1.7e-06
Cre06.g261450.t1.2	Cre10.g417675	1.7e-06
Cre06.g261450.t1.2	Cre02.g116750	2e-06
Cre06.g261450.t1.2	Cre07.g329050	2.1e-06
Cre06.g261450.t1.2	Cre07.g321400	2.1e-06
Cre06.g261450.t1.2	Cre02.g078226	2.1e-06
Cre06.g261450.t1.2	Cre13.g575500	2.1e-06
Cre06.g261450.t1.2	Cre13.g575550	2.1e-06
Cre06.g261450.t1.2	Cre03.g160250	2.1e-06
Cre06.g261450.t1.2	Cre12.g559053	2.1e-06
Cre06.g261450.t1.2	Cre05.g233051	2.3e-06
Cre06.g261450.t1.2	Cre12.g515500	3.4e-06
Cre06.g261450.t1.2	Cre04.g223150	4.6e-06
Cre06.g261450.t1.2	Cre11.g478950	4.8e-06
Cre06.g261450.t1.2	Cre02.g090526	4.8e-06
Cre06.g261450.t1.2	Cre02.g088200	4.8e-06
Cre06.g261450.t1.2	Cre03.g179820	4.8e-06
Cre06.g261450.t1.2	Cre01.g018350	4.8e-06
Cre06.g261450.t1.2	Cre04.g226114	4.8e-06
Cre06.g261450.t1.2	Cre12.g554850	4.8e-06
Cre06.g261450.t1.2	Cre12.g484250	6.2e-06
Cre06.g261450.t1.2	Cre15.g635350	8.6e-06
Cre06.g261450.t1.2	Cre15.g635300	8.6e-06
Cre06.g261450.t1.2	Cre12.g537900	9.6e-06
Cre06.g261450.t1.2	Cre12.g537850	9.6e-06
Cre06.g261450.t1.2	Cre01.g020750	1e-05
Cre06.g261450.t1.2	Cre01.g020701	1e-05
Cre06.g261450.t1.2	Cre09.g413450	1.3e-05
Cre06.g261450.t1.2	Cre09.g394102	1.4e-05
Cre06.g261450.t1.2	Cre10.g434600	1.5e-05
Cre06.g261450.t1.2	Cre10.g434550	1.5e-05
Cre06.g261450.t1.2	Cre01.g030150	1.7e-05
Cre06.g261450.t1.2	Cre01.g053350	1.8e-05
Cre06.g261450.t1.2	Cre09.g387951	2e-05
Cre06.g261450.t1.2	Cre02.g092950	2e-05
Cre06.g261450.t1.2	Cre02.g092926	2e-05
Cre06.g261450.t1.2	Cre07.g325724	2.2e-05
Cre06.g261450.t1.2	Cre07.g325723	2.2e-05
Cre06.g261450.t1.2	Cre12.g488550	2.3e-05
Cre06.g261450.t1.2	Cre12.g488600	2.3e-05
Cre06.g261450.t1.2	Cre16.g673465	2.3e-05
Cre06.g261450.t1.2	Cre09.g386107	2.9e-05
Cre06.g261450.t1.2	Cre01.g072027	4e-05
Cre06.g261450.t1.2	Cre17.g733000	4e-05
Cre06.g261450.t1.2	Cre17.g732951	4e-05
Cre06.g261450.t1.2	Cre12.g539650	4.2e-05
Cre06.g261450.t1.2	Cre12.g537050	4.3e-05
Cre06.g261450.t1.2	Cre01.g041752	4.6e-05
Cre06.g261450.t1.2	Cre06.g271526	4.7e-05
Cre06.g261450.t1.2	Cre17.g705100	4.7e-05
Cre06.g261450.t1.2	Cre03.g143807	5.1e-05
Cre06.g261450.t1.2	Cre19.g750797	5.1e-05
Cre06.g261450.t1.2	Cre09.g399900	5.1e-05
Cre06.g261450.t1.2	Cre09.g399950	5.1e-05
Cre06.g261450.t1.2	Cre17.g735650	6.8e-05
Cre06.g261450.t1.2	Cre11.g467721	7.2e-05
Cre06.g261450.t1.2	Cre09.g392867	7.2e-05
Cre06.g261450.t1.2	Cre16.g687700	7.8e-05
Cre06.g261450.t1.2	Cre01.g012400	7.8e-05
Cre06.g261450.t1.2	Cre01.g012450	7.8e-05
Cre06.g261450.t1.2	Cre16.g689733	7.8e-05
Cre06.g261450.t1.2	Cre17.g719792	8.1e-05
Cre06.g261450.t1.2	Cre06.g269601	8.4e-05
Cre06.g261450.t1.2	Cre05.g243650	8.4e-05
Cre06.g261450.t1.2	Cre11.g467649	9e-05
Cre06.g261450.t1.2	Cre13.g565116	0.0001
Cre06.g261450.t1.2	Cre15.g637315	0.0001
Cre06.g261450.t1.2	Cre12.g514900	0.00012
Cre06.g261450.t1.2	Cre13.g585200	0.00014
Cre06.g261450.t1.2	Cre17.g712126	0.00015
Cre06.g261450.t1.2	Cre09.g399812	0.00015
Cre06.g261450.t1.2	Cre02.g142727	0.00018
Cre06.g261450.t1.2	Cre02.g078251	0.00018
Cre06.g261450.t1.2	Cre12.g550553	0.00019
Cre06.g261450.t1.2	Cre10.g466100	0.00019
Cre06.g261450.t1.2	Cre09.g416150	0.00019
Cre06.g261450.t1.2	Cre06.g290676	0.00019
Cre06.g261450.t1.2	Cre06.g254240	0.00019
Cre06.g261450.t1.2	Cre15.g637150	0.00019
Cre06.g261450.t1.2	Cre06.g278134	0.00021
Cre06.g261450.t1.2	Cre02.g089950	0.00021
Cre06.g261450.t1.2	Cre02.g090000	0.00021
Cre06.g261450.t1.2	Cre10.g444900	0.00021
Cre06.g261450.t1.2	Cre12.g506750	0.00022
Cre06.g261450.t1.2	Cre12.g483600	0.00023
Cre06.g261450.t1.2	Cre08.g373450	0.00023
Cre06.g261450.t1.2	Cre16.g670200	0.00023
Cre06.g261450.t1.2	Cre16.g670150	0.00023
Cre06.g261450.t1.2	Cre09.g416650	0.00024
Cre06.g261450.t1.2	Cre06.g301806	0.00026
Cre06.g261450.t1.2	Cre03.g146647	0.00026
Cre06.g261450.t1.2	Cre01.g001600	0.00027
Cre06.g261450.t1.2	Cre02.g091950	0.00028
Cre06.g261450.t1.2	Cre17.g734250	0.00029
Cre06.g261450.t1.2	Cre05.g237450	0.00029
Cre06.g261450.t1.2	Cre09.g399849	0.00031
Cre06.g261450.t1.2	Cre07.g347700	0.00032
Cre06.g261450.t1.2	Cre07.g347650	0.00032
Cre06.g261450.t1.2	Cre13.g607300	0.00036
Cre06.g261450.t1.2	Cre01.g019300	0.00041
Cre06.g261450.t1.2	Cre12.g549002	0.00043
Cre06.g261450.t1.2	Cre06.g289426	0.00047
Cre06.g261450.t1.2	Cre09.g401404	0.0005
Cre06.g261450.t1.2	Cre06.g299900	0.00051
Cre06.g261450.t1.2	Cre17.g745047	0.00056
Cre06.g261450.t1.2	Cre10.g449020	0.00058
Cre06.g261450.t1.2	Cre12.g483476	0.00059
Cre06.g261450.t1.2	Cre17.g714450	0.0006
Cre06.g261450.t1.2	Cre09.g389400	0.00064
Cre06.g261450.t1.2	Cre09.g389350	0.00064
Cre06.g261450.t1.2	Cre06.g259476	0.00065
Cre06.g261450.t1.2	Cre14.g617002	0.00069
Cre06.g261450.t1.2	Cre14.g617027	0.00069
Cre06.g261450.t1.2	Cre01.g016542	0.00086
Cre06.g261450.t1.2	Cre14.g608600	0.00087
Cre06.g261450.t1.2	Cre16.g678650	0.00087
Cre06.g261450.t1.2	Cre17.g743997	0.00087
Cre06.g261450.t1.2	Cre03.g174500	0.00087
Cre06.g261450.t1.2	Cre07.g343101	0.00091
Cre06.g261450.t1.2	Cre14.g628752	0.00091
Cre06.g261450.t1.2	Cre16.g689450	0.00091
Cre06.g261450.t1.2	Cre09.g398250	0.00091
Cre06.g261450.t1.2	Cre09.g400849	0.00091
Cre06.g261450.t1.2	Cre02.g141486	0.00091
Cre06.g261450.t1.2	Cre03.g144144	0.00091
Cre06.g261450.t1.2	Cre04.g217700	0.00091
Cre06.g261450.t1.2	Cre02.g142566	0.00092
Cre06.g261450.t1.2	Cre09.g406350	0.00093
Cre06.g261450.t1.2	Cre06.g252576	0.00097
Cre06.g261450.t1.2	Cre20.g751447	0.00099
Cre06.g261450.t1.2	Cre02.g141351	0.001
Cre06.g261450.t1.2	Cre02.g141250	0.001
Cre06.g261450.t1.2	Cre07.g330250	0.0011
Cre06.g261450.t1.2	Cre07.g330200	0.0011
Cre06.g261450.t1.2	Cre07.g356950	0.0011
Cre06.g261450.t1.2	Cre10.g427896	0.0011
Cre06.g261450.t1.2	Cre06.g287100	0.0012
Cre06.g261450.t1.2	Cre06.g287150	0.0012
Cre06.g261450.t1.2	Cre09.g398178	0.0012
Cre06.g261450.t1.2	Cre05.g230804	0.0013
Cre06.g261450.t1.2	Cre05.g238724	0.0013
Cre06.g261450.t1.2	Cre06.g310601	0.0014
Cre06.g261450.t1.2	Cre01.g016500	0.0014
Cre06.g261450.t1.2	Cre05.g235650	0.0014
Cre06.g261450.t1.2	Cre12.g510250	0.0014
Cre06.g261450.t1.2	Cre13.g565083	0.0014
Cre06.g261450.t1.2	Cre12.g513650	0.0015
Cre06.g261450.t1.2	Cre01.g044650	0.0016
Cre06.g261450.t1.2	Cre08.g370850	0.0016
Cre06.g261450.t1.2	Cre02.g120250	0.0017
Cre06.g261450.t1.2	Cre06.g308533	0.0017
Cre06.g261450.t1.2	Cre01.g005300	0.0021
Cre06.g261450.t1.2	Cre08.g358541	0.0023
Cre06.g261450.t1.2	Cre07.g317400	0.0024
Cre06.g261450.t1.2	Cre11.g469800	0.0024
Cre06.g261450.t1.2	Cre02.g095117	0.0025
Cre06.g261450.t1.2	Cre11.g481700	0.0026
Cre06.g261450.t1.2	Cre06.g260900	0.0026
Cre06.g261450.t1.2	Cre08.g358565	0.0027
Cre06.g261450.t1.2	Cre07.g323300	0.0027
Cre06.g261450.t1.2	Cre02.g076663	0.0028
Cre06.g261450.t1.2	Cre02.g142650	0.003
Cre06.g261450.t1.2	Cre02.g074626	0.0032
Cre06.g261450.t1.2	Cre10.g432900	0.0033
Cre06.g261450.t1.2	Cre10.g432850	0.0033
Cre06.g261450.t1.2	Cre17.g741272	0.0034
Cre06.g261450.t1.2	Cre12.g518350	0.0035
Cre06.g261450.t1.2	Cre12.g518400	0.0035
Cre06.g261450.t1.2	Cre01.g043500	0.0039
Cre06.g261450.t1.2	Cre12.g501403	0.0043
Cre06.g261450.t1.2	Cre15.g636004	0.0044
Cre06.g261450.t1.2	Cre15.g640900	0.0044
Cre06.g261450.t1.2	Cre03.g194900	0.0044
Cre06.g261450.t1.2	Cre11.g483351	0.0046
Cre06.g261450.t1.2	Cre01.g006614	0.0049
Cre06.g261450.t1.2	Cre17.g707850	0.0049
Cre06.g261450.t1.2	Cre09.g397845	0.0053
Cre06.g261450.t1.2	Cre02.g109300	0.0056
Cre06.g261450.t1.2	Cre07.g341251	0.0056
Cre06.g261450.t1.2	Cre42.g760447	0.0056
Cre06.g261450.t1.2	Cre09.g411150	0.0056
Cre06.g261450.t1.2	Cre03.g175750	0.0056
Cre06.g261450.t1.2	Cre12.g507550	0.0056
Cre06.g261450.t1.2	Cre12.g542550	0.0056
Cre06.g261450.t1.2	Cre07.g312600	0.0059
Cre06.g261450.t1.2	Cre07.g337933	0.006
Cre06.g261450.t1.2	Cre07.g343600	0.0061
Cre06.g261450.t1.2	Cre09.g386755	0.0061
Cre06.g261450.t1.2	Cre08.g372650	0.0062
Cre06.g261450.t1.2	Cre09.g404950	0.0062
Cre06.g261450.t1.2	Cre10.g422419	0.0062
Cre06.g261450.t1.2	Cre10.g431900	0.0063
Cre06.g261450.t1.2	Cre10.g431850	0.0063
Cre06.g261450.t1.2	Cre02.g142046	0.0065
Cre06.g261450.t1.2	Cre13.g577850	0.0071
Cre06.g261450.t1.2	Cre10.g457297	0.0073
Cre06.g261450.t1.2	Cre10.g457262	0.0073
Cre06.g261450.t1.2	Cre02.g074217	0.0074
Cre06.g261450.t1.2	Cre10.g437601	0.0075
Cre06.g261450.t1.2	Cre12.g498600	0.0078
Cre06.g261450.t1.2	Cre01.g023650	0.0079
Cre06.g261450.t1.2	Cre08.g358450	0.0082
Cre06.g261450.t1.2	Cre12.g561300	0.0085
Cre06.g261450.t1.2	Cre01.g042502	0.0087
Cre06.g261450.t1.2	Cre08.g382500	0.0088
Cre06.g261450.t1.2	Cre16.g680650	0.0088
Cre06.g261450.t1.2	Cre17.g731600	0.0088
Cre06.g261450.t1.2	Cre17.g731591	0.0088
Cre06.g261450.t1.2	Cre02.g086456	0.0089
Cre06.g261450.t1.2	Cre10.g434150	0.009
Cre06.g261450.t1.2	Cre10.g420550	0.009
Cre06.g261450.t1.2	Cre10.g420537	0.009
Cre06.g261450.t1.2	Cre16.g665650	0.0097
Cre06.g261450.t1.2	Cre06.g255550	0.0098
Cre06.g261450.t1.2	Cre16.g651300	0.01
Cre06.g261450.t1.2	Cre01.g071662	0.01
Cre06.g261450.t1.2	Cre01.g071297	0.01
Cre06.g261450.t1.2	Cre05.g233050	0.011
Cre06.g261450.t1.2	Cre03.g205585	0.011
Cre06.g261450.t1.2	Cre18.g749497	0.012
Cre06.g261450.t1.2	Cre18.g749447	0.012
Cre06.g261450.t1.2	Cre02.g073900	0.012
Cre06.g261450.t1.2	Cre12.g532900	0.012
Cre06.g261450.t1.2	Cre11.g468362	0.012
Cre06.g261450.t1.2	Cre03.g146887	0.013
Cre06.g261450.t1.2	Cre09.g410750	0.013
Cre06.g261450.t1.2	Cre11.g467663	0.014
Cre06.g261450.t1.2	Cre06.g257450	0.014
Cre06.g261450.t1.2	Cre17.g703932	0.014
Cre06.g261450.t1.2	Cre17.g703950	0.014
Cre06.g261450.t1.2	Cre06.g289300	0.014
Cre06.g261450.t1.2	Cre06.g289200	0.014
Cre06.g261450.t1.2	Cre17.g744047	0.014
Cre06.g261450.t1.2	Cre12.g539850	0.014
Cre06.g261450.t1.2	Cre11.g467620	0.014
Cre06.g261450.t1.2	Cre16.g664850	0.014
Cre06.g261450.t1.2	Cre03.g153306	0.014
Cre06.g261450.t1.2	Cre04.g231418	0.015
Cre06.g261450.t1.2	Cre17.g724873	0.015
Cre06.g261450.t1.2	Cre15.g638550	0.015
Cre06.g261450.t1.2	Cre10.g442950	0.015
Cre06.g261450.t1.2	Cre12.g539161	0.016
Cre06.g261450.t1.2	Cre04.g211600	0.016
Cre06.g261450.t1.2	Cre04.g211599	0.016
Cre06.g261450.t1.2	Cre02.g083273	0.016
Cre06.g261450.t1.2	Cre03.g210065	0.017
Cre06.g261450.t1.2	Cre03.g210177	0.017
Cre06.g261450.t1.2	Cre08.g373374	0.018
Cre06.g261450.t1.2	Cre16.g666627	0.018
Cre06.g261450.t1.2	Cre09.g400034	0.018
Cre06.g261450.t1.2	Cre06.g278286	0.018
Cre06.g261450.t1.2	Cre06.g278301	0.018
Cre06.g261450.t1.2	Cre02.g095036	0.018
Cre06.g261450.t1.2	Cre27.g757447	0.018
Cre06.g261450.t1.2	Cre01.g006600	0.018
Cre06.g261450.t1.2	Cre10.g445299	0.018
Cre06.g261450.t1.2	Cre10.g445226	0.018
Cre06.g261450.t1.2	Cre10.g445251	0.018
Cre06.g261450.t1.2	Cre04.g217986	0.018
Cre06.g261450.t1.2	Cre12.g539205	0.018
Cre06.g261450.t1.2	Cre04.g229300	0.018
Cre06.g261450.t1.2	Cre09.g416309	0.019
Cre06.g261450.t1.2	Cre01.g042650	0.019
Cre06.g261450.t1.2	Cre12.g528100	0.02
Cre06.g261450.t1.2	Cre02.g147300	0.021
Cre06.g261450.t1.2	Cre11.g467529	0.022
Cre06.g261450.t1.2	Cre10.g422450	0.022
Cre06.g261450.t1.2	Cre07.g312002	0.022
Cre06.g261450.t1.2	Cre13.g590450	0.022
Cre06.g261450.t1.2	Cre01.g023300	0.022
Cre06.g261450.t1.2	Cre16.g654450	0.022
Cre06.g261450.t1.2	Cre07.g353650	0.024
Cre06.g261450.t1.2	Cre07.g353600	0.024
Cre06.g261450.t1.2	Cre16.g695200	0.024
Cre06.g261450.t1.2	Cre03.g150101	0.024
Cre06.g261450.t1.2	Cre17.g696900	0.025
Cre06.g261450.t1.2	Cre13.g567700	0.025
Cre06.g261450.t1.2	Cre10.g445371	0.026
Cre06.g261450.t1.2	Cre04.g217987	0.026
Cre06.g261450.t1.2	Cre04.g217988	0.026
Cre06.g261450.t1.2	Cre05.g245350	0.027
Cre06.g261450.t1.2	Cre09.g389809	0.028
Cre06.g261450.t1.2	Cre12.g511400	0.028
Cre06.g261450.t1.2	Cre18.g748547	0.028
Cre06.g261450.t1.2	Cre09.g415350	0.029
Cre06.g261450.t1.2	Cre03.g193550	0.031
Cre06.g261450.t1.2	Cre12.g528600	0.033
Cre06.g261450.t1.2	Cre01.g006202	0.033
Cre06.g261450.t1.2	Cre09.g403950	0.034
Cre06.g261450.t1.2	Cre03.g200850	0.035
Cre06.g261450.t1.2	Cre17.g733752	0.035
Cre06.g261450.t1.2	Cre08.g358546	0.036
Cre06.g261450.t1.2	Cre08.g371751	0.036
Cre06.g261450.t1.2	Cre12.g558526	0.036
Cre06.g261450.t1.2	Cre10.g439550	0.037
Cre06.g261450.t1.2	Cre09.g386753	0.04
Cre06.g261450.t1.2	Cre09.g386754	0.04
Cre06.g261450.t1.2	Cre16.g678885	0.04
Cre06.g261450.t1.2	Cre24.g755247	0.04
Cre06.g261450.t1.2	Cre15.g642376	0.041
Cre06.g261450.t1.2	Cre06.g290950	0.041
Cre06.g261450.t1.2	Cre06.g278190	0.042
Cre06.g261450.t1.2	Cre11.g478350	0.043
Cre06.g261450.t1.2	Cre21.g752897	0.046
Cre06.g261450.t1.2	Cre04.g231124	0.046
Cre06.g261450.t1.2	Cre04.g214209	0.046
Cre06.g261450.t1.2	Cre04.g214097	0.046
Cre06.g261450.t1.2	Cre09.g411400	0.046
Cre06.g261450.t1.2	Cre05.g238200	0.048
Cre06.g261450.t1.2	Cre02.g144606	0.048
Cre06.g261450.t1.2	Cre02.g144550	0.048
Cre06.g261450.t1.2	Cre06.g255700	0.05
Cre06.g261450.t1.2	Cre03.g206550	0.05
Cre06.g261450.t1.2	Cre02.g087800	0.05
Cre06.g261450.t1.2	Cre12.g494052	0.051
Cre06.g261450.t1.2	Cre02.g074474	0.052
Cre06.g261450.t1.2	Cre16.g667200	0.052
Cre06.g261450.t1.2	Cre09.g386743	0.053
Cre06.g261450.t1.2	Cre03.g155976	0.054
Cre06.g261450.t1.2	Cre03.g155950	0.054
Cre06.g261450.t1.2	Cre06.g310150	0.055
Cre06.g261450.t1.2	Cre17.g716613	0.057
Cre06.g261450.t1.2	Cre17.g716625	0.057
Cre06.g261450.t1.2	Cre07.g349650	0.058
Cre06.g261450.t1.2	Cre17.g740323	0.058
Cre06.g261450.t1.2	Cre11.g467578	0.058
Cre06.g261450.t1.2	Cre06.g250902	0.06
Cre06.g261450.t1.2	Cre03.g198850	0.06
Cre06.g261450.t1.2	Cre03.g153650	0.067
Cre06.g261450.t1.2	Cre03.g153600	0.067
Cre06.g261450.t1.2	Cre09.g391726	0.068
Cre06.g261450.t1.2	Cre01.g043300	0.068
Cre06.g261450.t1.2	Cre09.g389986	0.069
Cre06.g261450.t1.2	Cre06.g309900	0.073
Cre06.g261450.t1.2	Cre03.g200450	0.074
Cre06.g261450.t1.2	Cre17.g710950	0.075
Cre06.g261450.t1.2	Cre17.g710900	0.075
Cre06.g261450.t1.2	Cre07.g331600	0.078
Cre06.g261450.t1.2	Cre09.g394350	0.078
Cre06.g261450.t1.2	Cre02.g115508	0.078
Cre06.g261450.t1.2	Cre09.g401626	0.081
Cre06.g261450.t1.2	Cre09.g411666	0.081
Cre06.g261450.t1.2	Cre09.g389050	0.082
Cre06.g261450.t1.2	Cre08.g379500	0.085
Cre06.g261450.t1.2	Cre03.g156650	0.087
Cre06.g261450.t1.2	Cre09.g399000	0.088
Cre06.g261450.t1.2	Cre09.g398950	0.088
Cre06.g261450.t1.2	Cre08.g373300	0.089
Cre06.g261450.t1.2	Cre14.g614650	0.089
Cre06.g261450.t1.2	Cre14.g614667	0.089
Cre06.g261450.t1.2	Cre10.g452850	0.09
Cre06.g261450.t1.2	Cre01.g001700	0.092
Cre06.g261450.t1.2	Cre11.g467530	0.093
Cre06.g261450.t1.2	Cre12.g489300	0.093
Cre06.g261450.t1.2	Cre13.g572350	0.094
Cre06.g261450.t1.2	Cre13.g572375	0.094
Cre06.g261450.t1.2	Cre02.g079004	0.097
Cre06.g261450.t1.2	Cre05.g236500	0.097
Cre06.g261450.t1.2	Cre05.g236450	0.097
Cre06.g261450.t1.2	Cre17.g738000	0.099
Cre06.g261450.t1.2	Cre01.g004400	0.099
Cre06.g261450.t1.2	Cre16.g689199	0.1
Cre06.g261450.t1.2	Cre06.g259900	0.1
Cre06.g261450.t1.2	Cre10.g454150	0.1
Cre06.g261450.t1.2	Cre14.g630775	0.1
Cre06.g261450.t1.2	Cre12.g515450	0.11
Cre06.g261450.t1.2	Cre02.g095153	0.11
Cre06.g261450.t1.2	Cre13.g576433	0.11
Cre06.g261450.t1.2	Cre13.g576466	0.11
Cre06.g261450.t1.2	Cre07.g327950	0.11
Cre06.g261450.t1.2	Cre06.g291250	0.11
Cre06.g261450.t1.2	Cre06.g291300	0.11
Cre06.g261450.t1.2	Cre16.g677738	0.11
Cre06.g261450.t1.2	Cre09.g398771	0.11
Cre06.g261450.t1.2	Cre12.g520500	0.11
Cre06.g261450.t1.2	Cre12.g520450	0.11
Cre06.g261450.t1.2	Cre13.g603850	0.12
Cre06.g261450.t1.2	Cre08.g373350	0.12
Cre06.g261450.t1.2	Cre14.g622270	0.12
Cre06.g261450.t1.2	Cre27.g757397	0.12
Cre06.g261450.t1.2	Cre21.g753097	0.12
Cre06.g261450.t1.2	Cre12.g530200	0.12
Cre06.g261450.t1.2	Cre14.g615300	0.12
Cre06.g261450.t1.2	Cre14.g615350	0.12
Cre06.g261450.t1.2	Cre21.g753197	0.13
Cre06.g261450.t1.2	Cre07.g344800	0.13
Cre06.g261450.t1.2	Cre06.g301725	0.13
Cre06.g261450.t1.2	Cre12.g550450	0.14
Cre06.g261450.t1.2	Cre12.g550501	0.14
Cre06.g261450.t1.2	Cre01.g014600	0.14
Cre06.g261450.t1.2	Cre08.g380250	0.14
Cre06.g261450.t1.2	Cre01.g041700	0.15
Cre06.g261450.t1.2	Cre06.g254450	0.15
Cre06.g261450.t1.2	Cre12.g552005	0.15
Cre06.g261450.t1.2	Cre02.g106600	0.15
Cre06.g261450.t1.2	Cre06.g261026	0.15
Cre06.g261450.t1.2	Cre05.g246800	0.16
Cre06.g261450.t1.2	Cre01.g013900	0.16
Cre06.g261450.t1.2	Cre07.g354700	0.16
Cre06.g261450.t1.2	Cre10.g424700	0.16
Cre06.g261450.t1.2	Cre10.g465757	0.16
Cre06.g261450.t1.2	Cre03.g148500	0.16
Cre06.g261450.t1.2	Cre03.g148450	0.16
Cre06.g261450.t1.2	Cre17.g742932	0.17
Cre06.g261450.t1.2	Cre10.g464300	0.18
Cre06.g261450.t1.2	Cre14.g612800	0.18
Cre06.g261450.t1.2	Cre02.g113450	0.18
Cre06.g261450.t1.2	Cre01.g041650	0.18
Cre06.g261450.t1.2	Cre01.g041667	0.18
Cre06.g261450.t1.2	Cre02.g089600	0.18
Cre06.g261450.t1.2	Cre04.g226700	0.18
Cre06.g261450.t1.2	Cre07.g312150	0.18
Cre06.g261450.t1.2	Cre19.g750597	0.19
Cre06.g261450.t1.2	Cre05.g232454	0.19
Cre06.g261450.t1.2	Cre01.g030968	0.19
Cre06.g261450.t1.2	Cre13.g583787	0.2
Cre06.g261450.t1.2	Cre06.g278285	0.2
Cre06.g261450.t1.2	Cre15.g641282	0.2
Cre06.g261450.t1.2	Cre01.g041100	0.2
Cre06.g261450.t1.2	Cre14.g621400	0.2
Cre06.g261450.t1.2	Cre16.g655430	0.2
Cre06.g261450.t1.2	Cre06.g264100	0.21
Cre06.g261450.t1.2	Cre07.g335250	0.21
Cre06.g261450.t1.2	Cre03.g194050	0.21
Cre06.g261450.t1.2	Cre02.g142226	0.23
Cre06.g261450.t1.2	Cre05.g231100	0.23
Cre06.g261450.t1.2	Cre05.g231050	0.23
Cre06.g261450.t1.2	Cre17.g728350	0.23
Cre06.g261450.t1.2	Cre17.g728300	0.23
Cre06.g261450.t1.2	Cre06.g278291	0.24
Cre06.g261450.t1.2	Cre03.g148250	0.24
Cre06.g261450.t1.2	Cre09.g386739	0.25
Cre06.g261450.t1.2	Cre12.g520800	0.25
Cre06.g261450.t1.2	Cre04.g220000	0.25
Cre06.g261450.t1.2	Cre17.g741650	0.25
Cre06.g261450.t1.2	Cre06.g278104	0.26
Cre06.g261450.t1.2	Cre06.g278105	0.26
Cre06.g261450.t1.2	Cre13.g568050	0.26
Cre06.g261450.t1.2	Cre16.g687050	0.27
Cre06.g261450.t1.2	Cre12.g492250	0.27
Cre06.g261450.t1.2	Cre12.g492200	0.27
Cre06.g261450.t1.2	Cre17.g713575	0.27
Cre06.g261450.t1.2	Cre07.g346917	0.27
Cre06.g261450.t1.2	Cre09.g386300	0.28
Cre06.g261450.t1.2	Cre01.g007051	0.28
Cre06.g261450.t1.2	Cre45.g760797	0.28
Cre06.g261450.t1.2	Cre22.g753397	0.29
Cre06.g261450.t1.2	Cre08.g373414	0.31
Cre06.g261450.t1.2	Cre06.g289950	0.32
Cre06.g261450.t1.2	Cre03.g204450	0.32
Cre06.g261450.t1.2	Cre16.g677026	0.32
Cre06.g261450.t1.2	Cre01.g010300	0.32
Cre06.g261450.t1.2	Cre12.g484834	0.33
Cre06.g261450.t1.2	Cre12.g484800	0.33
Cre06.g261450.t1.2	Cre09.g416750	0.33
Cre06.g261450.t1.2	Cre03.g163550	0.33
Cre06.g261450.t1.2	Cre03.g163600	0.33
Cre06.g261450.t1.2	Cre17.g735876	0.34
Cre06.g261450.t1.2	Cre11.g478128	0.34
Cre06.g261450.t1.2	Cre11.g478100	0.34
Cre06.g261450.t1.2	Cre04.g229026	0.35
Cre06.g261450.t1.2	Cre03.g149400	0.35
Cre06.g261450.t1.2	Cre09.g388763	0.35
Cre06.g261450.t1.2	Cre12.g539208	0.35
Cre06.g261450.t1.2	Cre03.g194100	0.35
Cre06.g261450.t1.2	Cre09.g401589	0.36
Cre06.g261450.t1.2	Cre01.g038400	0.36
Cre06.g261450.t1.2	Cre16.g658775	0.36
Cre06.g261450.t1.2	Cre01.g001685	0.37
Cre06.g261450.t1.2	Cre13.g573550	0.37
Cre06.g261450.t1.2	Cre02.g118400	0.37
Cre06.g261450.t1.2	Cre17.g698100	0.37
Cre06.g261450.t1.2	Cre17.g744497	0.37
Cre06.g261450.t1.2	Cre06.g294400	0.38
Cre06.g261450.t1.2	Cre16.g679109	0.39
Cre06.g261450.t1.2	Cre06.g278179	0.39
Cre06.g261450.t1.2	Cre02.g095112	0.39
Cre06.g261450.t1.2	Cre14.g630763	0.4
Cre06.g261450.t1.2	Cre16.g688633	0.4
Cre06.g261450.t1.2	Cre06.g270500	0.4
Cre06.g261450.t1.2	Cre12.g528750	0.41
Cre06.g261450.t1.2	Cre02.g115650	0.41
Cre06.g261450.t1.2	Cre07.g352251	0.42
Cre06.g261450.t1.2	Cre07.g352300	0.42
Cre06.g261450.t1.2	Cre02.g099550	0.43
Cre06.g261450.t1.2	Cre11.g467784	0.44
Cre06.g261450.t1.2	Cre10.g465550	0.46
Cre06.g261450.t1.2	Cre03.g205350	0.46
Cre06.g261450.t1.2	Cre03.g205400	0.46
Cre06.g261450.t1.2	Cre10.g461000	0.47
Cre06.g261450.t1.2	Cre09.g387986	0.48
Cre06.g261450.t1.2	Cre17.g746497	0.49
Cre06.g261450.t1.2	Cre02.g142346	0.49
Cre06.g261450.t1.2	Cre12.g495958	0.49
Cre06.g261450.t1.2	Cre01.g030550	0.49
Cre06.g261450.t1.2	Cre01.g044550	0.5
Cre06.g261450.t1.2	Cre02.g074400	0.5
Cre06.g261450.t1.2	Cre08.g366500	0.5
Cre06.g261450.t1.2	Cre08.g369950	0.5
Cre06.g261450.t1.2	Cre03.g203625	0.52
Cre06.g261450.t1.2	Cre06.g270050	0.52
Cre06.g261450.t1.2	Cre17.g743497	0.53
Cre06.g261450.t1.2	Cre14.g627917	0.54
Cre06.g261450.t1.2	Cre04.g219400	0.54
Cre06.g261450.t1.2	Cre17.g744097	0.55
Cre06.g261450.t1.2	Cre03.g150850	0.55
Cre06.g261450.t1.2	Cre03.g150800	0.55
Cre06.g261450.t1.2	Cre02.g100500	0.55
Cre06.g261450.t1.2	Cre02.g100450	0.55
Cre06.g261450.t1.2	Cre14.g620150	0.56
Cre06.g261450.t1.2	Cre15.g635700	0.57
Cre06.g261450.t1.2	Cre05.g236183	0.57
Cre06.g261450.t1.2	Cre05.g236216	0.57
Cre06.g261450.t1.2	Cre12.g537226	0.57
Cre06.g261450.t1.2	Cre03.g150767	0.58
Cre06.g261450.t1.2	Cre03.g150783	0.58
Cre06.g261450.t1.2	Cre17.g716500	0.58
Cre06.g261450.t1.2	Cre08.g383350	0.58
Cre06.g261450.t1.2	Cre03.g167712	0.59
Cre06.g261450.t1.2	Cre14.g611300	0.59
Cre06.g261450.t1.2	Cre16.g667701	0.6
Cre06.g261450.t1.2	Cre06.g278302	0.6
Cre06.g261450.t1.2	Cre13.g577800	0.6
Cre06.g261450.t1.2	Cre10.g459151	0.61
Cre06.g261450.t1.2	Cre10.g459100	0.61
Cre06.g261450.t1.2	Cre12.g537150	0.61
Cre06.g261450.t1.2	Cre02.g117781	0.62
Cre06.g261450.t1.2	Cre06.g278150	0.65
Cre06.g261450.t1.2	Cre21.g752147	0.65
Cre06.g261450.t1.2	Cre05.g232455	0.66
Cre06.g261450.t1.2	Cre03.g212977	0.67
Cre06.g261450.t1.2	Cre06.g254250	0.68
Cre06.g261450.t1.2	Cre01.g006766	0.68
Cre06.g261450.t1.2	Cre03.g153200	0.68
Cre06.g261450.t1.2	Cre15.g640400	0.7
Cre06.g261450.t1.2	Cre12.g510350	0.71
Cre06.g261450.t1.2	Cre12.g510300	0.71
Cre06.g261450.t1.2	Cre16.g690902	0.71
Cre06.g261450.t1.2	Cre17.g710879	0.72
Cre06.g261450.t1.2	Cre17.g710871	0.72
Cre06.g261450.t1.2	Cre17.g733850	0.75
Cre06.g261450.t1.2	Cre12.g520050	0.76
Cre06.g261450.t1.2	Cre09.g399775	0.76
Cre06.g261450.t1.2	Cre01.g006670	0.76
Cre06.g261450.t1.2	Cre07.g343250	0.76
Cre06.g261450.t1.2	Cre04.g215500	0.76
Cre06.g261450.t1.2	Cre04.g215550	0.76
Cre06.g261450.t1.2	Cre09.g413141	0.77
Cre06.g261450.t1.2	Cre03.g143707	0.77
Cre06.g261450.t1.2	Cre03.g143727	0.77
Cre06.g261450.t1.2	Cre01.g041400	0.79
Cre06.g261450.t1.2	Cre17.g738050	0.8
Cre06.g261450.t1.2	Cre12.g555152	0.84
Cre06.g261450.t1.2	Cre12.g555100	0.84
Cre06.g261450.t1.2	Cre02.g142353	0.85
Cre06.g261450.t1.2	Cre06.g278272	0.86
Cre06.g261450.t1.2	Cre09.g401108	0.87
Cre06.g261450.t1.2	Cre09.g416900	0.87
Cre06.g261450.t1.2	Cre11.g467665	0.87
Cre06.g261450.t1.2	Cre03.g192050	0.88
Cre06.g261450.t1.2	Cre03.g192100	0.88
Cre06.g261450.t1.2	Cre06.g249550	0.91
Cre06.g261450.t1.2	Cre06.g257476	0.91
Cre06.g261450.t1.2	Cre06.g293150	0.92
Cre06.g261450.t1.2	Cre03.g207100	0.96
Cre06.g261450.t1.2	Cre03.g188350	0.97
Cre06.g261450.t1.2	Cre15.g639552	0.97
Cre06.g261450.t1.2	Cre12.g550000	0.98
Cre06.g261450.t1.2	Cre12.g549950	0.98
Cre06.g261450.t1.2	Cre09.g396772	0.99
Cre06.g261450.t1.2	Cre02.g143900	0.99
Cre06.g261450.t1.2	Cre02.g079100	1
Cre06.g261450.t1.2	Cre05.g234892	1
Cre06.g261450.t1.2	Cre04.g217550	1
Cre06.g261450.t1.2	Cre15.g641875	1
Cre06.g261450.t1.2	Cre16.g676757	1
Cre11.g482700.t1.2	Cre10.g464450	0.002
Cre11.g482700.t1.2	Cre10.g464500	0.002
Cre11.g482700.t1.2	Cre08.g374150	0.026
Cre11.g482700.t1.2	Cre11.g482150	0.034
Cre11.g482700.t1.2	Cre04.g217906	0.1
Cre11.g482700.t1.2	Cre04.g217905	0.1
Cre11.g482700.t1.2	Cre01.g054550	0.11
Cre11.g482700.t1.2	Cre01.g054600	0.11
Cre11.g482700.t1.2	Cre01.g012100	0.17
Cre11.g482700.t1.2	Cre12.g488100	0.2
Cre11.g482700.t1.2	Cre07.g315432	0.24
Cre11.g482700.t1.2	Cre02.g080050	0.48
Cre11.g482700.t1.2	Cre02.g080100	0.48
Cre11.g482700.t1.2	Cre08.g365550	0.56
Cre11.g482700.t1.2	Cre14.g623050	0.91
Cre11.g482700.t1.2	Cre17.g734300	1
Cre11.g482700.t1.2	Cre07.g325752	1
Cre12.g508150.t1.2	Cre12.g560450	0.0088
Cre12.g508150.t1.2	Cre07.g353450	0.16
Cre12.g508150.t1.2	Cre03.g146627	0.67
Cre16.g672300.t1.2	Cre12.g507000	5.3e-08
Cre16.g672300.t1.2	Cre05.g233551	8.1e-08
Cre16.g672300.t1.2	Cre08.g364400	1.5e-07
Cre16.g672300.t1.2	Cre17.g736750	2.7e-07
Cre16.g672300.t1.2	Cre13.g566450	2.7e-07
Cre16.g672300.t1.2	Cre03.g144011	5.9e-07
Cre16.g672300.t1.2	Cre09.g398983	1.7e-06
Cre16.g672300.t1.2	Cre01.g051482	1.7e-06
Cre16.g672300.t1.2	Cre17.g742100	1.7e-06
Cre16.g672300.t1.2	Cre17.g742116	1.7e-06
Cre16.g672300.t1.2	Cre10.g417675	1.7e-06
Cre16.g672300.t1.2	Cre02.g116750	2e-06
Cre16.g672300.t1.2	Cre07.g329050	2.1e-06
Cre16.g672300.t1.2	Cre07.g321400	2.1e-06
Cre16.g672300.t1.2	Cre02.g078226	2.1e-06
Cre16.g672300.t1.2	Cre13.g575500	2.1e-06
Cre16.g672300.t1.2	Cre13.g575550	2.1e-06
Cre16.g672300.t1.2	Cre03.g160250	2.1e-06
Cre16.g672300.t1.2	Cre12.g559053	2.1e-06
Cre16.g672300.t1.2	Cre05.g233051	2.3e-06
Cre16.g672300.t1.2	Cre12.g515500	3.4e-06
Cre16.g672300.t1.2	Cre04.g223150	4.6e-06
Cre16.g672300.t1.2	Cre11.g478950	4.8e-06
Cre16.g672300.t1.2	Cre02.g090526	4.8e-06
Cre16.g672300.t1.2	Cre02.g088200	4.8e-06
Cre16.g672300.t1.2	Cre03.g179820	4.8e-06
Cre16.g672300.t1.2	Cre01.g018350	4.8e-06
Cre16.g672300.t1.2	Cre04.g226114	4.8e-06
Cre16.g672300.t1.2	Cre12.g554850	4.8e-06
Cre16.g672300.t1.2	Cre12.g484250	6.2e-06
Cre16.g672300.t1.2	Cre15.g635350	8.6e-06
Cre16.g672300.t1.2	Cre15.g635300	8.6e-06
Cre16.g672300.t1.2	Cre12.g537900	9.6e-06
Cre16.g672300.t1.2	Cre12.g537850	9.6e-06
Cre16.g672300.t1.2	Cre01.g020750	1e-05
Cre16.g672300.t1.2	Cre01.g020701	1e-05
Cre16.g672300.t1.2	Cre09.g413450	1.3e-05
Cre16.g672300.t1.2	Cre09.g394102	1.4e-05
Cre16.g672300.t1.2	Cre10.g434600	1.5e-05
Cre16.g672300.t1.2	Cre10.g434550	1.5e-05
Cre16.g672300.t1.2	Cre01.g030150	1.7e-05
Cre16.g672300.t1.2	Cre01.g053350	1.8e-05
Cre16.g672300.t1.2	Cre09.g387951	2e-05
Cre16.g672300.t1.2	Cre02.g092950	2e-05
Cre16.g672300.t1.2	Cre02.g092926	2e-05
Cre16.g672300.t1.2	Cre07.g325724	2.2e-05
Cre16.g672300.t1.2	Cre07.g325723	2.2e-05
Cre16.g672300.t1.2	Cre12.g488550	2.3e-05
Cre16.g672300.t1.2	Cre12.g488600	2.3e-05
Cre16.g672300.t1.2	Cre16.g673465	2.3e-05
Cre16.g672300.t1.2	Cre09.g386107	2.9e-05
Cre16.g672300.t1.2	Cre01.g072027	4e-05
Cre16.g672300.t1.2	Cre17.g733000	4e-05
Cre16.g672300.t1.2	Cre17.g732951	4e-05
Cre16.g672300.t1.2	Cre12.g539650	4.2e-05
Cre16.g672300.t1.2	Cre12.g537050	4.3e-05
Cre16.g672300.t1.2	Cre01.g041752	4.6e-05
Cre16.g672300.t1.2	Cre06.g271526	4.7e-05
Cre16.g672300.t1.2	Cre17.g705100	4.7e-05
Cre16.g672300.t1.2	Cre03.g143807	5.1e-05
Cre16.g672300.t1.2	Cre19.g750797	5.1e-05
Cre16.g672300.t1.2	Cre09.g399900	5.1e-05
Cre16.g672300.t1.2	Cre09.g399950	5.1e-05
Cre16.g672300.t1.2	Cre17.g735650	6.8e-05
Cre16.g672300.t1.2	Cre11.g467721	7.2e-05
Cre16.g672300.t1.2	Cre09.g392867	7.2e-05
Cre16.g672300.t1.2	Cre16.g687700	7.8e-05
Cre16.g672300.t1.2	Cre01.g012400	7.8e-05
Cre16.g672300.t1.2	Cre01.g012450	7.8e-05
Cre16.g672300.t1.2	Cre16.g689733	7.8e-05
Cre16.g672300.t1.2	Cre17.g719792	8.1e-05
Cre16.g672300.t1.2	Cre06.g269601	8.4e-05
Cre16.g672300.t1.2	Cre05.g243650	8.4e-05
Cre16.g672300.t1.2	Cre11.g467649	9e-05
Cre16.g672300.t1.2	Cre13.g565116	0.0001
Cre16.g672300.t1.2	Cre15.g637315	0.0001
Cre16.g672300.t1.2	Cre12.g514900	0.00012
Cre16.g672300.t1.2	Cre13.g585200	0.00014
Cre16.g672300.t1.2	Cre17.g712126	0.00015
Cre16.g672300.t1.2	Cre09.g399812	0.00015
Cre16.g672300.t1.2	Cre02.g142727	0.00018
Cre16.g672300.t1.2	Cre02.g078251	0.00018
Cre16.g672300.t1.2	Cre12.g550553	0.00019
Cre16.g672300.t1.2	Cre10.g466100	0.00019
Cre16.g672300.t1.2	Cre09.g416150	0.00019
Cre16.g672300.t1.2	Cre06.g290676	0.00019
Cre16.g672300.t1.2	Cre06.g254240	0.00019
Cre16.g672300.t1.2	Cre15.g637150	0.00019
Cre16.g672300.t1.2	Cre06.g278134	0.00021
Cre16.g672300.t1.2	Cre02.g089950	0.00021
Cre16.g672300.t1.2	Cre02.g090000	0.00021
Cre16.g672300.t1.2	Cre10.g444900	0.00021
Cre16.g672300.t1.2	Cre12.g506750	0.00022
Cre16.g672300.t1.2	Cre12.g483600	0.00023
Cre16.g672300.t1.2	Cre08.g373450	0.00023
Cre16.g672300.t1.2	Cre16.g670200	0.00023
Cre16.g672300.t1.2	Cre16.g670150	0.00023
Cre16.g672300.t1.2	Cre09.g416650	0.00024
Cre16.g672300.t1.2	Cre06.g301806	0.00026
Cre16.g672300.t1.2	Cre03.g146647	0.00026
Cre16.g672300.t1.2	Cre01.g001600	0.00027
Cre16.g672300.t1.2	Cre02.g091950	0.00028
Cre16.g672300.t1.2	Cre17.g734250	0.00029
Cre16.g672300.t1.2	Cre05.g237450	0.00029
Cre16.g672300.t1.2	Cre09.g399849	0.00031
Cre16.g672300.t1.2	Cre07.g347700	0.00032
Cre16.g672300.t1.2	Cre07.g347650	0.00032
Cre16.g672300.t1.2	Cre13.g607300	0.00036
Cre16.g672300.t1.2	Cre01.g019300	0.00041
Cre16.g672300.t1.2	Cre12.g549002	0.00043
Cre16.g672300.t1.2	Cre06.g289426	0.00047
Cre16.g672300.t1.2	Cre09.g401404	0.0005
Cre16.g672300.t1.2	Cre06.g299900	0.00051
Cre16.g672300.t1.2	Cre17.g745047	0.00056
Cre16.g672300.t1.2	Cre10.g449020	0.00058
Cre16.g672300.t1.2	Cre12.g483476	0.00059
Cre16.g672300.t1.2	Cre17.g714450	0.0006
Cre16.g672300.t1.2	Cre09.g389400	0.00064
Cre16.g672300.t1.2	Cre09.g389350	0.00064
Cre16.g672300.t1.2	Cre06.g259476	0.00065
Cre16.g672300.t1.2	Cre14.g617002	0.00069
Cre16.g672300.t1.2	Cre14.g617027	0.00069
Cre16.g672300.t1.2	Cre01.g016542	0.00086
Cre16.g672300.t1.2	Cre14.g608600	0.00087
Cre16.g672300.t1.2	Cre16.g678650	0.00087
Cre16.g672300.t1.2	Cre17.g743997	0.00087
Cre16.g672300.t1.2	Cre03.g174500	0.00087
Cre16.g672300.t1.2	Cre07.g343101	0.00091
Cre16.g672300.t1.2	Cre14.g628752	0.00091
Cre16.g672300.t1.2	Cre16.g689450	0.00091
Cre16.g672300.t1.2	Cre09.g398250	0.00091
Cre16.g672300.t1.2	Cre09.g400849	0.00091
Cre16.g672300.t1.2	Cre02.g141486	0.00091
Cre16.g672300.t1.2	Cre03.g144144	0.00091
Cre16.g672300.t1.2	Cre04.g217700	0.00091
Cre16.g672300.t1.2	Cre02.g142566	0.00092
Cre16.g672300.t1.2	Cre09.g406350	0.00093
Cre16.g672300.t1.2	Cre06.g252576	0.00097
Cre16.g672300.t1.2	Cre20.g751447	0.00099
Cre16.g672300.t1.2	Cre02.g141351	0.001
Cre16.g672300.t1.2	Cre02.g141250	0.001
Cre16.g672300.t1.2	Cre07.g330250	0.0011
Cre16.g672300.t1.2	Cre07.g330200	0.0011
Cre16.g672300.t1.2	Cre07.g356950	0.0011
Cre16.g672300.t1.2	Cre10.g427896	0.0011
Cre16.g672300.t1.2	Cre06.g287100	0.0012
Cre16.g672300.t1.2	Cre06.g287150	0.0012
Cre16.g672300.t1.2	Cre09.g398178	0.0012
Cre16.g672300.t1.2	Cre05.g230804	0.0013
Cre16.g672300.t1.2	Cre05.g238724	0.0013
Cre16.g672300.t1.2	Cre06.g310601	0.0014
Cre16.g672300.t1.2	Cre01.g016500	0.0014
Cre16.g672300.t1.2	Cre05.g235650	0.0014
Cre16.g672300.t1.2	Cre12.g510250	0.0014
Cre16.g672300.t1.2	Cre13.g565083	0.0014
Cre16.g672300.t1.2	Cre12.g513650	0.0015
Cre16.g672300.t1.2	Cre01.g044650	0.0016
Cre16.g672300.t1.2	Cre08.g370850	0.0016
Cre16.g672300.t1.2	Cre02.g120250	0.0017
Cre16.g672300.t1.2	Cre06.g308533	0.0017
Cre16.g672300.t1.2	Cre01.g005300	0.0021
Cre16.g672300.t1.2	Cre08.g358541	0.0023
Cre16.g672300.t1.2	Cre07.g317400	0.0024
Cre16.g672300.t1.2	Cre11.g469800	0.0024
Cre16.g672300.t1.2	Cre02.g095117	0.0025
Cre16.g672300.t1.2	Cre11.g481700	0.0026
Cre16.g672300.t1.2	Cre06.g260900	0.0026
Cre16.g672300.t1.2	Cre08.g358565	0.0027
Cre16.g672300.t1.2	Cre07.g323300	0.0027
Cre16.g672300.t1.2	Cre02.g076663	0.0028
Cre16.g672300.t1.2	Cre02.g142650	0.003
Cre16.g672300.t1.2	Cre02.g074626	0.0032
Cre16.g672300.t1.2	Cre10.g432900	0.0033
Cre16.g672300.t1.2	Cre10.g432850	0.0033
Cre16.g672300.t1.2	Cre17.g741272	0.0034
Cre16.g672300.t1.2	Cre12.g518350	0.0035
Cre16.g672300.t1.2	Cre12.g518400	0.0035
Cre16.g672300.t1.2	Cre01.g043500	0.0039
Cre16.g672300.t1.2	Cre12.g501403	0.0043
Cre16.g672300.t1.2	Cre15.g636004	0.0044
Cre16.g672300.t1.2	Cre15.g640900	0.0044
Cre16.g672300.t1.2	Cre03.g194900	0.0044
Cre16.g672300.t1.2	Cre11.g483351	0.0046
Cre16.g672300.t1.2	Cre01.g006614	0.0049
Cre16.g672300.t1.2	Cre17.g707850	0.0049
Cre16.g672300.t1.2	Cre09.g397845	0.0053
Cre16.g672300.t1.2	Cre02.g109300	0.0056
Cre16.g672300.t1.2	Cre07.g341251	0.0056
Cre16.g672300.t1.2	Cre42.g760447	0.0056
Cre16.g672300.t1.2	Cre09.g411150	0.0056
Cre16.g672300.t1.2	Cre03.g175750	0.0056
Cre16.g672300.t1.2	Cre12.g507550	0.0056
Cre16.g672300.t1.2	Cre12.g542550	0.0056
Cre16.g672300.t1.2	Cre07.g312600	0.0059
Cre16.g672300.t1.2	Cre07.g337933	0.006
Cre16.g672300.t1.2	Cre07.g343600	0.0061
Cre16.g672300.t1.2	Cre09.g386755	0.0061
Cre16.g672300.t1.2	Cre08.g372650	0.0062
Cre16.g672300.t1.2	Cre09.g404950	0.0062
Cre16.g672300.t1.2	Cre10.g422419	0.0062
Cre16.g672300.t1.2	Cre10.g431900	0.0063
Cre16.g672300.t1.2	Cre10.g431850	0.0063
Cre16.g672300.t1.2	Cre02.g142046	0.0065
Cre16.g672300.t1.2	Cre13.g577850	0.0071
Cre16.g672300.t1.2	Cre10.g457297	0.0073
Cre16.g672300.t1.2	Cre10.g457262	0.0073
Cre16.g672300.t1.2	Cre02.g074217	0.0074
Cre16.g672300.t1.2	Cre10.g437601	0.0075
Cre16.g672300.t1.2	Cre12.g498600	0.0078
Cre16.g672300.t1.2	Cre01.g023650	0.0079
Cre16.g672300.t1.2	Cre08.g358450	0.0082
Cre16.g672300.t1.2	Cre12.g561300	0.0085
Cre16.g672300.t1.2	Cre01.g042502	0.0087
Cre16.g672300.t1.2	Cre08.g382500	0.0088
Cre16.g672300.t1.2	Cre16.g680650	0.0088
Cre16.g672300.t1.2	Cre17.g731600	0.0088
Cre16.g672300.t1.2	Cre17.g731591	0.0088
Cre16.g672300.t1.2	Cre02.g086456	0.0089
Cre16.g672300.t1.2	Cre10.g434150	0.009
Cre16.g672300.t1.2	Cre10.g420550	0.009
Cre16.g672300.t1.2	Cre10.g420537	0.009
Cre16.g672300.t1.2	Cre16.g665650	0.0097
Cre16.g672300.t1.2	Cre06.g255550	0.0098
Cre16.g672300.t1.2	Cre16.g651300	0.01
Cre16.g672300.t1.2	Cre01.g071662	0.01
Cre16.g672300.t1.2	Cre01.g071297	0.01
Cre16.g672300.t1.2	Cre05.g233050	0.011
Cre16.g672300.t1.2	Cre03.g205585	0.011
Cre16.g672300.t1.2	Cre18.g749497	0.012
Cre16.g672300.t1.2	Cre18.g749447	0.012
Cre16.g672300.t1.2	Cre02.g073900	0.012
Cre16.g672300.t1.2	Cre12.g532900	0.012
Cre16.g672300.t1.2	Cre11.g468362	0.012
Cre16.g672300.t1.2	Cre03.g146887	0.013
Cre16.g672300.t1.2	Cre09.g410750	0.013
Cre16.g672300.t1.2	Cre11.g467663	0.014
Cre16.g672300.t1.2	Cre06.g257450	0.014
Cre16.g672300.t1.2	Cre17.g703932	0.014
Cre16.g672300.t1.2	Cre17.g703950	0.014
Cre16.g672300.t1.2	Cre06.g289300	0.014
Cre16.g672300.t1.2	Cre06.g289200	0.014
Cre16.g672300.t1.2	Cre17.g744047	0.014
Cre16.g672300.t1.2	Cre12.g539850	0.014
Cre16.g672300.t1.2	Cre11.g467620	0.014
Cre16.g672300.t1.2	Cre16.g664850	0.014
Cre16.g672300.t1.2	Cre03.g153306	0.014
Cre16.g672300.t1.2	Cre04.g231418	0.015
Cre16.g672300.t1.2	Cre17.g724873	0.015
Cre16.g672300.t1.2	Cre15.g638550	0.015
Cre16.g672300.t1.2	Cre10.g442950	0.015
Cre16.g672300.t1.2	Cre12.g539161	0.016
Cre16.g672300.t1.2	Cre04.g211600	0.016
Cre16.g672300.t1.2	Cre04.g211599	0.016
Cre16.g672300.t1.2	Cre02.g083273	0.016
Cre16.g672300.t1.2	Cre03.g210065	0.017
Cre16.g672300.t1.2	Cre03.g210177	0.017
Cre16.g672300.t1.2	Cre08.g373374	0.018
Cre16.g672300.t1.2	Cre16.g666627	0.018
Cre16.g672300.t1.2	Cre09.g400034	0.018
Cre16.g672300.t1.2	Cre06.g278286	0.018
Cre16.g672300.t1.2	Cre06.g278301	0.018
Cre16.g672300.t1.2	Cre02.g095036	0.018
Cre16.g672300.t1.2	Cre27.g757447	0.018
Cre16.g672300.t1.2	Cre01.g006600	0.018
Cre16.g672300.t1.2	Cre10.g445299	0.018
Cre16.g672300.t1.2	Cre10.g445226	0.018
Cre16.g672300.t1.2	Cre10.g445251	0.018
Cre16.g672300.t1.2	Cre04.g217986	0.018
Cre16.g672300.t1.2	Cre12.g539205	0.018
Cre16.g672300.t1.2	Cre04.g229300	0.018
Cre16.g672300.t1.2	Cre09.g416309	0.019
Cre16.g672300.t1.2	Cre01.g042650	0.019
Cre16.g672300.t1.2	Cre12.g528100	0.02
Cre16.g672300.t1.2	Cre02.g147300	0.021
Cre16.g672300.t1.2	Cre11.g467529	0.022
Cre16.g672300.t1.2	Cre10.g422450	0.022
Cre16.g672300.t1.2	Cre07.g312002	0.022
Cre16.g672300.t1.2	Cre13.g590450	0.022
Cre16.g672300.t1.2	Cre01.g023300	0.022
Cre16.g672300.t1.2	Cre16.g654450	0.022
Cre16.g672300.t1.2	Cre07.g353650	0.024
Cre16.g672300.t1.2	Cre07.g353600	0.024
Cre16.g672300.t1.2	Cre16.g695200	0.024
Cre16.g672300.t1.2	Cre03.g150101	0.024
Cre16.g672300.t1.2	Cre17.g696900	0.025
Cre16.g672300.t1.2	Cre13.g567700	0.025
Cre16.g672300.t1.2	Cre10.g445371	0.026
Cre16.g672300.t1.2	Cre04.g217987	0.026
Cre16.g672300.t1.2	Cre04.g217988	0.026
Cre16.g672300.t1.2	Cre05.g245350	0.027
Cre16.g672300.t1.2	Cre09.g389809	0.028
Cre16.g672300.t1.2	Cre12.g511400	0.028
Cre16.g672300.t1.2	Cre18.g748547	0.028
Cre16.g672300.t1.2	Cre09.g415350	0.029
Cre16.g672300.t1.2	Cre03.g193550	0.031
Cre16.g672300.t1.2	Cre12.g528600	0.033
Cre16.g672300.t1.2	Cre01.g006202	0.033
Cre16.g672300.t1.2	Cre09.g403950	0.034
Cre16.g672300.t1.2	Cre03.g200850	0.035
Cre16.g672300.t1.2	Cre17.g733752	0.035
Cre16.g672300.t1.2	Cre08.g358546	0.036
Cre16.g672300.t1.2	Cre08.g371751	0.036
Cre16.g672300.t1.2	Cre12.g558526	0.036
Cre16.g672300.t1.2	Cre10.g439550	0.037
Cre16.g672300.t1.2	Cre09.g386753	0.04
Cre16.g672300.t1.2	Cre09.g386754	0.04
Cre16.g672300.t1.2	Cre16.g678885	0.04
Cre16.g672300.t1.2	Cre24.g755247	0.04
Cre16.g672300.t1.2	Cre15.g642376	0.041
Cre16.g672300.t1.2	Cre06.g290950	0.041
Cre16.g672300.t1.2	Cre06.g278190	0.042
Cre16.g672300.t1.2	Cre11.g478350	0.043
Cre16.g672300.t1.2	Cre21.g752897	0.046
Cre16.g672300.t1.2	Cre04.g231124	0.046
Cre16.g672300.t1.2	Cre04.g214209	0.046
Cre16.g672300.t1.2	Cre04.g214097	0.046
Cre16.g672300.t1.2	Cre09.g411400	0.046
Cre16.g672300.t1.2	Cre05.g238200	0.048
Cre16.g672300.t1.2	Cre02.g144606	0.048
Cre16.g672300.t1.2	Cre02.g144550	0.048
Cre16.g672300.t1.2	Cre06.g255700	0.05
Cre16.g672300.t1.2	Cre03.g206550	0.05
Cre16.g672300.t1.2	Cre02.g087800	0.05
Cre16.g672300.t1.2	Cre12.g494052	0.051
Cre16.g672300.t1.2	Cre02.g074474	0.052
Cre16.g672300.t1.2	Cre16.g667200	0.052
Cre16.g672300.t1.2	Cre09.g386743	0.053
Cre16.g672300.t1.2	Cre03.g155976	0.054
Cre16.g672300.t1.2	Cre03.g155950	0.054
Cre16.g672300.t1.2	Cre06.g310150	0.055
Cre16.g672300.t1.2	Cre17.g716613	0.057
Cre16.g672300.t1.2	Cre17.g716625	0.057
Cre16.g672300.t1.2	Cre07.g349650	0.058
Cre16.g672300.t1.2	Cre17.g740323	0.058
Cre16.g672300.t1.2	Cre11.g467578	0.058
Cre16.g672300.t1.2	Cre06.g250902	0.06
Cre16.g672300.t1.2	Cre03.g198850	0.06
Cre16.g672300.t1.2	Cre03.g153650	0.067
Cre16.g672300.t1.2	Cre03.g153600	0.067
Cre16.g672300.t1.2	Cre09.g391726	0.068
Cre16.g672300.t1.2	Cre01.g043300	0.068
Cre16.g672300.t1.2	Cre09.g389986	0.069
Cre16.g672300.t1.2	Cre06.g309900	0.073
Cre16.g672300.t1.2	Cre03.g200450	0.074
Cre16.g672300.t1.2	Cre17.g710950	0.075
Cre16.g672300.t1.2	Cre17.g710900	0.075
Cre16.g672300.t1.2	Cre07.g331600	0.078
Cre16.g672300.t1.2	Cre09.g394350	0.078
Cre16.g672300.t1.2	Cre02.g115508	0.078
Cre16.g672300.t1.2	Cre09.g401626	0.081
Cre16.g672300.t1.2	Cre09.g411666	0.081
Cre16.g672300.t1.2	Cre09.g389050	0.082
Cre16.g672300.t1.2	Cre08.g379500	0.085
Cre16.g672300.t1.2	Cre03.g156650	0.087
Cre16.g672300.t1.2	Cre09.g399000	0.088
Cre16.g672300.t1.2	Cre09.g398950	0.088
Cre16.g672300.t1.2	Cre08.g373300	0.089
Cre16.g672300.t1.2	Cre14.g614650	0.089
Cre16.g672300.t1.2	Cre14.g614667	0.089
Cre16.g672300.t1.2	Cre10.g452850	0.09
Cre16.g672300.t1.2	Cre01.g001700	0.092
Cre16.g672300.t1.2	Cre11.g467530	0.093
Cre16.g672300.t1.2	Cre12.g489300	0.093
Cre16.g672300.t1.2	Cre13.g572350	0.094
Cre16.g672300.t1.2	Cre13.g572375	0.094
Cre16.g672300.t1.2	Cre02.g079004	0.097
Cre16.g672300.t1.2	Cre05.g236500	0.097
Cre16.g672300.t1.2	Cre05.g236450	0.097
Cre16.g672300.t1.2	Cre17.g738000	0.099
Cre16.g672300.t1.2	Cre01.g004400	0.099
Cre16.g672300.t1.2	Cre16.g689199	0.1
Cre16.g672300.t1.2	Cre06.g259900	0.1
Cre16.g672300.t1.2	Cre10.g454150	0.1
Cre16.g672300.t1.2	Cre14.g630775	0.1
Cre16.g672300.t1.2	Cre12.g515450	0.11
Cre16.g672300.t1.2	Cre02.g095153	0.11
Cre16.g672300.t1.2	Cre13.g576433	0.11
Cre16.g672300.t1.2	Cre13.g576466	0.11
Cre16.g672300.t1.2	Cre07.g327950	0.11
Cre16.g672300.t1.2	Cre06.g291250	0.11
Cre16.g672300.t1.2	Cre06.g291300	0.11
Cre16.g672300.t1.2	Cre16.g677738	0.11
Cre16.g672300.t1.2	Cre09.g398771	0.11
Cre16.g672300.t1.2	Cre12.g520500	0.11
Cre16.g672300.t1.2	Cre12.g520450	0.11
Cre16.g672300.t1.2	Cre13.g603850	0.12
Cre16.g672300.t1.2	Cre08.g373350	0.12
Cre16.g672300.t1.2	Cre14.g622270	0.12
Cre16.g672300.t1.2	Cre27.g757397	0.12
Cre16.g672300.t1.2	Cre21.g753097	0.12
Cre16.g672300.t1.2	Cre12.g530200	0.12
Cre16.g672300.t1.2	Cre14.g615300	0.12
Cre16.g672300.t1.2	Cre14.g615350	0.12
Cre16.g672300.t1.2	Cre21.g753197	0.13
Cre16.g672300.t1.2	Cre07.g344800	0.13
Cre16.g672300.t1.2	Cre06.g301725	0.13
Cre16.g672300.t1.2	Cre12.g550450	0.14
Cre16.g672300.t1.2	Cre12.g550501	0.14
Cre16.g672300.t1.2	Cre01.g014600	0.14
Cre16.g672300.t1.2	Cre08.g380250	0.14
Cre16.g672300.t1.2	Cre01.g041700	0.15
Cre16.g672300.t1.2	Cre06.g254450	0.15
Cre16.g672300.t1.2	Cre12.g552005	0.15
Cre16.g672300.t1.2	Cre02.g106600	0.15
Cre16.g672300.t1.2	Cre06.g261026	0.15
Cre16.g672300.t1.2	Cre05.g246800	0.16
Cre16.g672300.t1.2	Cre01.g013900	0.16
Cre16.g672300.t1.2	Cre07.g354700	0.16
Cre16.g672300.t1.2	Cre10.g424700	0.16
Cre16.g672300.t1.2	Cre10.g465757	0.16
Cre16.g672300.t1.2	Cre03.g148500	0.16
Cre16.g672300.t1.2	Cre03.g148450	0.16
Cre16.g672300.t1.2	Cre17.g742932	0.17
Cre16.g672300.t1.2	Cre10.g464300	0.18
Cre16.g672300.t1.2	Cre14.g612800	0.18
Cre16.g672300.t1.2	Cre02.g113450	0.18
Cre16.g672300.t1.2	Cre01.g041650	0.18
Cre16.g672300.t1.2	Cre01.g041667	0.18
Cre16.g672300.t1.2	Cre02.g089600	0.18
Cre16.g672300.t1.2	Cre04.g226700	0.18
Cre16.g672300.t1.2	Cre07.g312150	0.18
Cre16.g672300.t1.2	Cre19.g750597	0.19
Cre16.g672300.t1.2	Cre05.g232454	0.19
Cre16.g672300.t1.2	Cre01.g030968	0.19
Cre16.g672300.t1.2	Cre13.g583787	0.2
Cre16.g672300.t1.2	Cre06.g278285	0.2
Cre16.g672300.t1.2	Cre15.g641282	0.2
Cre16.g672300.t1.2	Cre01.g041100	0.2
Cre16.g672300.t1.2	Cre14.g621400	0.2
Cre16.g672300.t1.2	Cre16.g655430	0.2
Cre16.g672300.t1.2	Cre06.g264100	0.21
Cre16.g672300.t1.2	Cre07.g335250	0.21
Cre16.g672300.t1.2	Cre03.g194050	0.21
Cre16.g672300.t1.2	Cre02.g142226	0.23
Cre16.g672300.t1.2	Cre05.g231100	0.23
Cre16.g672300.t1.2	Cre05.g231050	0.23
Cre16.g672300.t1.2	Cre17.g728350	0.23
Cre16.g672300.t1.2	Cre17.g728300	0.23
Cre16.g672300.t1.2	Cre06.g278291	0.24
Cre16.g672300.t1.2	Cre03.g148250	0.24
Cre16.g672300.t1.2	Cre09.g386739	0.25
Cre16.g672300.t1.2	Cre12.g520800	0.25
Cre16.g672300.t1.2	Cre04.g220000	0.25
Cre16.g672300.t1.2	Cre17.g741650	0.25
Cre16.g672300.t1.2	Cre06.g278104	0.26
Cre16.g672300.t1.2	Cre06.g278105	0.26
Cre16.g672300.t1.2	Cre13.g568050	0.26
Cre16.g672300.t1.2	Cre16.g687050	0.27
Cre16.g672300.t1.2	Cre12.g492250	0.27
Cre16.g672300.t1.2	Cre12.g492200	0.27
Cre16.g672300.t1.2	Cre17.g713575	0.27
Cre16.g672300.t1.2	Cre07.g346917	0.27
Cre16.g672300.t1.2	Cre09.g386300	0.28
Cre16.g672300.t1.2	Cre01.g007051	0.28
Cre16.g672300.t1.2	Cre45.g760797	0.28
Cre16.g672300.t1.2	Cre22.g753397	0.29
Cre16.g672300.t1.2	Cre08.g373414	0.31
Cre16.g672300.t1.2	Cre06.g289950	0.32
Cre16.g672300.t1.2	Cre03.g204450	0.32
Cre16.g672300.t1.2	Cre16.g677026	0.32
Cre16.g672300.t1.2	Cre01.g010300	0.32
Cre16.g672300.t1.2	Cre12.g484834	0.33
Cre16.g672300.t1.2	Cre12.g484800	0.33
Cre16.g672300.t1.2	Cre09.g416750	0.33
Cre16.g672300.t1.2	Cre03.g163550	0.33
Cre16.g672300.t1.2	Cre03.g163600	0.33
Cre16.g672300.t1.2	Cre17.g735876	0.34
Cre16.g672300.t1.2	Cre11.g478128	0.34
Cre16.g672300.t1.2	Cre11.g478100	0.34
Cre16.g672300.t1.2	Cre04.g229026	0.35
Cre16.g672300.t1.2	Cre03.g149400	0.35
Cre16.g672300.t1.2	Cre09.g388763	0.35
Cre16.g672300.t1.2	Cre12.g539208	0.35
Cre16.g672300.t1.2	Cre03.g194100	0.35
Cre16.g672300.t1.2	Cre09.g401589	0.36
Cre16.g672300.t1.2	Cre01.g038400	0.36
Cre16.g672300.t1.2	Cre16.g658775	0.36
Cre16.g672300.t1.2	Cre01.g001685	0.37
Cre16.g672300.t1.2	Cre13.g573550	0.37
Cre16.g672300.t1.2	Cre02.g118400	0.37
Cre16.g672300.t1.2	Cre17.g698100	0.37
Cre16.g672300.t1.2	Cre17.g744497	0.37
Cre16.g672300.t1.2	Cre06.g294400	0.38
Cre16.g672300.t1.2	Cre16.g679109	0.39
Cre16.g672300.t1.2	Cre06.g278179	0.39
Cre16.g672300.t1.2	Cre02.g095112	0.39
Cre16.g672300.t1.2	Cre14.g630763	0.4
Cre16.g672300.t1.2	Cre16.g688633	0.4
Cre16.g672300.t1.2	Cre06.g270500	0.4
Cre16.g672300.t1.2	Cre12.g528750	0.41
Cre16.g672300.t1.2	Cre02.g115650	0.41
Cre16.g672300.t1.2	Cre07.g352251	0.42
Cre16.g672300.t1.2	Cre07.g352300	0.42
Cre16.g672300.t1.2	Cre02.g099550	0.43
Cre16.g672300.t1.2	Cre11.g467784	0.44
Cre16.g672300.t1.2	Cre10.g465550	0.46
Cre16.g672300.t1.2	Cre03.g205350	0.46
Cre16.g672300.t1.2	Cre03.g205400	0.46
Cre16.g672300.t1.2	Cre10.g461000	0.47
Cre16.g672300.t1.2	Cre09.g387986	0.48
Cre16.g672300.t1.2	Cre17.g746497	0.49
Cre16.g672300.t1.2	Cre02.g142346	0.49
Cre16.g672300.t1.2	Cre12.g495958	0.49
Cre16.g672300.t1.2	Cre01.g030550	0.49
Cre16.g672300.t1.2	Cre01.g044550	0.5
Cre16.g672300.t1.2	Cre02.g074400	0.5
Cre16.g672300.t1.2	Cre08.g366500	0.5
Cre16.g672300.t1.2	Cre08.g369950	0.5
Cre16.g672300.t1.2	Cre03.g203625	0.52
Cre16.g672300.t1.2	Cre06.g270050	0.52
Cre16.g672300.t1.2	Cre17.g743497	0.53
Cre16.g672300.t1.2	Cre14.g627917	0.54
Cre16.g672300.t1.2	Cre04.g219400	0.54
Cre16.g672300.t1.2	Cre17.g744097	0.55
Cre16.g672300.t1.2	Cre03.g150850	0.55
Cre16.g672300.t1.2	Cre03.g150800	0.55
Cre16.g672300.t1.2	Cre02.g100500	0.55
Cre16.g672300.t1.2	Cre02.g100450	0.55
Cre16.g672300.t1.2	Cre14.g620150	0.56
Cre16.g672300.t1.2	Cre15.g635700	0.57
Cre16.g672300.t1.2	Cre05.g236183	0.57
Cre16.g672300.t1.2	Cre05.g236216	0.57
Cre16.g672300.t1.2	Cre12.g537226	0.57
Cre16.g672300.t1.2	Cre03.g150767	0.58
Cre16.g672300.t1.2	Cre03.g150783	0.58
Cre16.g672300.t1.2	Cre17.g716500	0.58
Cre16.g672300.t1.2	Cre08.g383350	0.58
Cre16.g672300.t1.2	Cre03.g167712	0.59
Cre16.g672300.t1.2	Cre14.g611300	0.59
Cre16.g672300.t1.2	Cre16.g667701	0.6
Cre16.g672300.t1.2	Cre06.g278302	0.6
Cre16.g672300.t1.2	Cre13.g577800	0.6
Cre16.g672300.t1.2	Cre10.g459151	0.61
Cre16.g672300.t1.2	Cre10.g459100	0.61
Cre16.g672300.t1.2	Cre12.g537150	0.61
Cre16.g672300.t1.2	Cre02.g117781	0.62
Cre16.g672300.t1.2	Cre06.g278150	0.65
Cre16.g672300.t1.2	Cre21.g752147	0.65
Cre16.g672300.t1.2	Cre05.g232455	0.66
Cre16.g672300.t1.2	Cre03.g212977	0.67
Cre16.g672300.t1.2	Cre06.g254250	0.68
Cre16.g672300.t1.2	Cre01.g006766	0.68
Cre16.g672300.t1.2	Cre03.g153200	0.68
Cre16.g672300.t1.2	Cre15.g640400	0.7
Cre16.g672300.t1.2	Cre12.g510350	0.71
Cre16.g672300.t1.2	Cre12.g510300	0.71
Cre16.g672300.t1.2	Cre16.g690902	0.71
Cre16.g672300.t1.2	Cre17.g710879	0.72
Cre16.g672300.t1.2	Cre17.g710871	0.72
Cre16.g672300.t1.2	Cre17.g733850	0.75
Cre16.g672300.t1.2	Cre12.g520050	0.76
Cre16.g672300.t1.2	Cre09.g399775	0.76
Cre16.g672300.t1.2	Cre01.g006670	0.76
Cre16.g672300.t1.2	Cre07.g343250	0.76
Cre16.g672300.t1.2	Cre04.g215500	0.76
Cre16.g672300.t1.2	Cre04.g215550	0.76
Cre16.g672300.t1.2	Cre09.g413141	0.77
Cre16.g672300.t1.2	Cre03.g143707	0.77
Cre16.g672300.t1.2	Cre03.g143727	0.77
Cre16.g672300.t1.2	Cre01.g041400	0.79
Cre16.g672300.t1.2	Cre17.g738050	0.8
Cre16.g672300.t1.2	Cre12.g555152	0.84
Cre16.g672300.t1.2	Cre12.g555100	0.84
Cre16.g672300.t1.2	Cre02.g142353	0.85
Cre16.g672300.t1.2	Cre06.g278272	0.86
Cre16.g672300.t1.2	Cre09.g401108	0.87
Cre16.g672300.t1.2	Cre09.g416900	0.87
Cre16.g672300.t1.2	Cre11.g467665	0.87
Cre16.g672300.t1.2	Cre03.g192050	0.88
Cre16.g672300.t1.2	Cre03.g192100	0.88
Cre16.g672300.t1.2	Cre06.g249550	0.91
Cre16.g672300.t1.2	Cre06.g257476	0.91
Cre16.g672300.t1.2	Cre06.g293150	0.92
Cre16.g672300.t1.2	Cre03.g207100	0.96
Cre16.g672300.t1.2	Cre03.g188350	0.97
Cre16.g672300.t1.2	Cre15.g639552	0.97
Cre16.g672300.t1.2	Cre12.g550000	0.98
Cre16.g672300.t1.2	Cre12.g549950	0.98
Cre16.g672300.t1.2	Cre09.g396772	0.99
Cre16.g672300.t1.2	Cre02.g143900	0.99
Cre16.g672300.t1.2	Cre02.g079100	1
Cre16.g672300.t1.2	Cre05.g234892	1
Cre16.g672300.t1.2	Cre04.g217550	1
Cre16.g672300.t1.2	Cre15.g641875	1
Cre16.g672300.t1.2	Cre16.g676757	1
Cre17.g702650.t1.1	Cre12.g507000	5.3e-08
Cre17.g702650.t1.1	Cre05.g233551	8.1e-08
Cre17.g702650.t1.1	Cre08.g364400	1.5e-07
Cre17.g702650.t1.1	Cre17.g736750	2.7e-07
Cre17.g702650.t1.1	Cre13.g566450	2.7e-07
Cre17.g702650.t1.1	Cre03.g144011	5.9e-07
Cre17.g702650.t1.1	Cre09.g398983	1.7e-06
Cre17.g702650.t1.1	Cre01.g051482	1.7e-06
Cre17.g702650.t1.1	Cre17.g742100	1.7e-06
Cre17.g702650.t1.1	Cre17.g742116	1.7e-06
Cre17.g702650.t1.1	Cre10.g417675	1.7e-06
Cre17.g702650.t1.1	Cre02.g116750	2e-06
Cre17.g702650.t1.1	Cre07.g329050	2.1e-06
Cre17.g702650.t1.1	Cre07.g321400	2.1e-06
Cre17.g702650.t1.1	Cre02.g078226	2.1e-06
Cre17.g702650.t1.1	Cre13.g575500	2.1e-06
Cre17.g702650.t1.1	Cre13.g575550	2.1e-06
Cre17.g702650.t1.1	Cre03.g160250	2.1e-06
Cre17.g702650.t1.1	Cre12.g559053	2.1e-06
Cre17.g702650.t1.1	Cre05.g233051	2.3e-06
Cre17.g702650.t1.1	Cre12.g515500	3.4e-06
Cre17.g702650.t1.1	Cre04.g223150	4.6e-06
Cre17.g702650.t1.1	Cre11.g478950	4.8e-06
Cre17.g702650.t1.1	Cre02.g090526	4.8e-06
Cre17.g702650.t1.1	Cre02.g088200	4.8e-06
Cre17.g702650.t1.1	Cre03.g179820	4.8e-06
Cre17.g702650.t1.1	Cre01.g018350	4.8e-06
Cre17.g702650.t1.1	Cre04.g226114	4.8e-06
Cre17.g702650.t1.1	Cre12.g554850	4.8e-06
Cre17.g702650.t1.1	Cre12.g484250	6.2e-06
Cre17.g702650.t1.1	Cre15.g635350	8.6e-06
Cre17.g702650.t1.1	Cre15.g635300	8.6e-06
Cre17.g702650.t1.1	Cre12.g537900	9.6e-06
Cre17.g702650.t1.1	Cre12.g537850	9.6e-06
Cre17.g702650.t1.1	Cre01.g020750	1e-05
Cre17.g702650.t1.1	Cre01.g020701	1e-05
Cre17.g702650.t1.1	Cre09.g413450	1.3e-05
Cre17.g702650.t1.1	Cre09.g394102	1.4e-05
Cre17.g702650.t1.1	Cre10.g434600	1.5e-05
Cre17.g702650.t1.1	Cre10.g434550	1.5e-05
Cre17.g702650.t1.1	Cre01.g030150	1.7e-05
Cre17.g702650.t1.1	Cre01.g053350	1.8e-05
Cre17.g702650.t1.1	Cre09.g387951	2e-05
Cre17.g702650.t1.1	Cre02.g092950	2e-05
Cre17.g702650.t1.1	Cre02.g092926	2e-05
Cre17.g702650.t1.1	Cre07.g325724	2.2e-05
Cre17.g702650.t1.1	Cre07.g325723	2.2e-05
Cre17.g702650.t1.1	Cre12.g488550	2.3e-05
Cre17.g702650.t1.1	Cre12.g488600	2.3e-05
Cre17.g702650.t1.1	Cre16.g673465	2.3e-05
Cre17.g702650.t1.1	Cre09.g386107	2.9e-05
Cre17.g702650.t1.1	Cre01.g072027	4e-05
Cre17.g702650.t1.1	Cre17.g733000	4e-05
Cre17.g702650.t1.1	Cre17.g732951	4e-05
Cre17.g702650.t1.1	Cre12.g539650	4.2e-05
Cre17.g702650.t1.1	Cre12.g537050	4.3e-05
Cre17.g702650.t1.1	Cre01.g041752	4.6e-05
Cre17.g702650.t1.1	Cre06.g271526	4.7e-05
Cre17.g702650.t1.1	Cre17.g705100	4.7e-05
Cre17.g702650.t1.1	Cre03.g143807	5.1e-05
Cre17.g702650.t1.1	Cre19.g750797	5.1e-05
Cre17.g702650.t1.1	Cre09.g399900	5.1e-05
Cre17.g702650.t1.1	Cre09.g399950	5.1e-05
Cre17.g702650.t1.1	Cre17.g735650	6.8e-05
Cre17.g702650.t1.1	Cre11.g467721	7.2e-05
Cre17.g702650.t1.1	Cre09.g392867	7.2e-05
Cre17.g702650.t1.1	Cre16.g687700	7.8e-05
Cre17.g702650.t1.1	Cre01.g012400	7.8e-05
Cre17.g702650.t1.1	Cre01.g012450	7.8e-05
Cre17.g702650.t1.1	Cre16.g689733	7.8e-05
Cre17.g702650.t1.1	Cre17.g719792	8.1e-05
Cre17.g702650.t1.1	Cre06.g269601	8.4e-05
Cre17.g702650.t1.1	Cre05.g243650	8.4e-05
Cre17.g702650.t1.1	Cre11.g467649	9e-05
Cre17.g702650.t1.1	Cre13.g565116	0.0001
Cre17.g702650.t1.1	Cre15.g637315	0.0001
Cre17.g702650.t1.1	Cre12.g514900	0.00012
Cre17.g702650.t1.1	Cre13.g585200	0.00014
Cre17.g702650.t1.1	Cre17.g712126	0.00015
Cre17.g702650.t1.1	Cre09.g399812	0.00015
Cre17.g702650.t1.1	Cre02.g142727	0.00018
Cre17.g702650.t1.1	Cre02.g078251	0.00018
Cre17.g702650.t1.1	Cre12.g550553	0.00019
Cre17.g702650.t1.1	Cre10.g466100	0.00019
Cre17.g702650.t1.1	Cre09.g416150	0.00019
Cre17.g702650.t1.1	Cre06.g290676	0.00019
Cre17.g702650.t1.1	Cre06.g254240	0.00019
Cre17.g702650.t1.1	Cre15.g637150	0.00019
Cre17.g702650.t1.1	Cre06.g278134	0.00021
Cre17.g702650.t1.1	Cre02.g089950	0.00021
Cre17.g702650.t1.1	Cre02.g090000	0.00021
Cre17.g702650.t1.1	Cre10.g444900	0.00021
Cre17.g702650.t1.1	Cre12.g506750	0.00022
Cre17.g702650.t1.1	Cre12.g483600	0.00023
Cre17.g702650.t1.1	Cre08.g373450	0.00023
Cre17.g702650.t1.1	Cre16.g670200	0.00023
Cre17.g702650.t1.1	Cre16.g670150	0.00023
Cre17.g702650.t1.1	Cre09.g416650	0.00024
Cre17.g702650.t1.1	Cre06.g301806	0.00026
Cre17.g702650.t1.1	Cre03.g146647	0.00026
Cre17.g702650.t1.1	Cre01.g001600	0.00027
Cre17.g702650.t1.1	Cre02.g091950	0.00028
Cre17.g702650.t1.1	Cre17.g734250	0.00029
Cre17.g702650.t1.1	Cre05.g237450	0.00029
Cre17.g702650.t1.1	Cre09.g399849	0.00031
Cre17.g702650.t1.1	Cre07.g347700	0.00032
Cre17.g702650.t1.1	Cre07.g347650	0.00032
Cre17.g702650.t1.1	Cre13.g607300	0.00036
Cre17.g702650.t1.1	Cre01.g019300	0.00041
Cre17.g702650.t1.1	Cre12.g549002	0.00043
Cre17.g702650.t1.1	Cre06.g289426	0.00047
Cre17.g702650.t1.1	Cre09.g401404	0.0005
Cre17.g702650.t1.1	Cre06.g299900	0.00051
Cre17.g702650.t1.1	Cre17.g745047	0.00056
Cre17.g702650.t1.1	Cre10.g449020	0.00058
Cre17.g702650.t1.1	Cre12.g483476	0.00059
Cre17.g702650.t1.1	Cre17.g714450	0.0006
Cre17.g702650.t1.1	Cre09.g389400	0.00064
Cre17.g702650.t1.1	Cre09.g389350	0.00064
Cre17.g702650.t1.1	Cre06.g259476	0.00065
Cre17.g702650.t1.1	Cre14.g617002	0.00069
Cre17.g702650.t1.1	Cre14.g617027	0.00069
Cre17.g702650.t1.1	Cre01.g016542	0.00086
Cre17.g702650.t1.1	Cre14.g608600	0.00087
Cre17.g702650.t1.1	Cre16.g678650	0.00087
Cre17.g702650.t1.1	Cre17.g743997	0.00087
Cre17.g702650.t1.1	Cre03.g174500	0.00087
Cre17.g702650.t1.1	Cre07.g343101	0.00091
Cre17.g702650.t1.1	Cre14.g628752	0.00091
Cre17.g702650.t1.1	Cre16.g689450	0.00091
Cre17.g702650.t1.1	Cre09.g398250	0.00091
Cre17.g702650.t1.1	Cre09.g400849	0.00091
Cre17.g702650.t1.1	Cre02.g141486	0.00091
Cre17.g702650.t1.1	Cre03.g144144	0.00091
Cre17.g702650.t1.1	Cre04.g217700	0.00091
Cre17.g702650.t1.1	Cre02.g142566	0.00092
Cre17.g702650.t1.1	Cre09.g406350	0.00093
Cre17.g702650.t1.1	Cre06.g252576	0.00097
Cre17.g702650.t1.1	Cre20.g751447	0.00099
Cre17.g702650.t1.1	Cre02.g141351	0.001
Cre17.g702650.t1.1	Cre02.g141250	0.001
Cre17.g702650.t1.1	Cre07.g330250	0.0011
Cre17.g702650.t1.1	Cre07.g330200	0.0011
Cre17.g702650.t1.1	Cre07.g356950	0.0011
Cre17.g702650.t1.1	Cre10.g427896	0.0011
Cre17.g702650.t1.1	Cre06.g287100	0.0012
Cre17.g702650.t1.1	Cre06.g287150	0.0012
Cre17.g702650.t1.1	Cre09.g398178	0.0012
Cre17.g702650.t1.1	Cre05.g230804	0.0013
Cre17.g702650.t1.1	Cre05.g238724	0.0013
Cre17.g702650.t1.1	Cre06.g310601	0.0014
Cre17.g702650.t1.1	Cre01.g016500	0.0014
Cre17.g702650.t1.1	Cre05.g235650	0.0014
Cre17.g702650.t1.1	Cre12.g510250	0.0014
Cre17.g702650.t1.1	Cre13.g565083	0.0014
Cre17.g702650.t1.1	Cre12.g513650	0.0015
Cre17.g702650.t1.1	Cre01.g044650	0.0016
Cre17.g702650.t1.1	Cre08.g370850	0.0016
Cre17.g702650.t1.1	Cre02.g120250	0.0017
Cre17.g702650.t1.1	Cre06.g308533	0.0017
Cre17.g702650.t1.1	Cre01.g005300	0.0021
Cre17.g702650.t1.1	Cre08.g358541	0.0023
Cre17.g702650.t1.1	Cre07.g317400	0.0024
Cre17.g702650.t1.1	Cre11.g469800	0.0024
Cre17.g702650.t1.1	Cre02.g095117	0.0025
Cre17.g702650.t1.1	Cre11.g481700	0.0026
Cre17.g702650.t1.1	Cre06.g260900	0.0026
Cre17.g702650.t1.1	Cre08.g358565	0.0027
Cre17.g702650.t1.1	Cre07.g323300	0.0027
Cre17.g702650.t1.1	Cre02.g076663	0.0028
Cre17.g702650.t1.1	Cre02.g142650	0.003
Cre17.g702650.t1.1	Cre02.g074626	0.0032
Cre17.g702650.t1.1	Cre10.g432900	0.0033
Cre17.g702650.t1.1	Cre10.g432850	0.0033
Cre17.g702650.t1.1	Cre17.g741272	0.0034
Cre17.g702650.t1.1	Cre12.g518350	0.0035
Cre17.g702650.t1.1	Cre12.g518400	0.0035
Cre17.g702650.t1.1	Cre01.g043500	0.0039
Cre17.g702650.t1.1	Cre12.g501403	0.0043
Cre17.g702650.t1.1	Cre15.g636004	0.0044
Cre17.g702650.t1.1	Cre15.g640900	0.0044
Cre17.g702650.t1.1	Cre03.g194900	0.0044
Cre17.g702650.t1.1	Cre11.g483351	0.0046
Cre17.g702650.t1.1	Cre01.g006614	0.0049
Cre17.g702650.t1.1	Cre17.g707850	0.0049
Cre17.g702650.t1.1	Cre09.g397845	0.0053
Cre17.g702650.t1.1	Cre02.g109300	0.0056
Cre17.g702650.t1.1	Cre07.g341251	0.0056
Cre17.g702650.t1.1	Cre42.g760447	0.0056
Cre17.g702650.t1.1	Cre09.g411150	0.0056
Cre17.g702650.t1.1	Cre03.g175750	0.0056
Cre17.g702650.t1.1	Cre12.g507550	0.0056
Cre17.g702650.t1.1	Cre12.g542550	0.0056
Cre17.g702650.t1.1	Cre07.g312600	0.0059
Cre17.g702650.t1.1	Cre07.g337933	0.006
Cre17.g702650.t1.1	Cre07.g343600	0.0061
Cre17.g702650.t1.1	Cre09.g386755	0.0061
Cre17.g702650.t1.1	Cre08.g372650	0.0062
Cre17.g702650.t1.1	Cre09.g404950	0.0062
Cre17.g702650.t1.1	Cre10.g422419	0.0062
Cre17.g702650.t1.1	Cre10.g431900	0.0063
Cre17.g702650.t1.1	Cre10.g431850	0.0063
Cre17.g702650.t1.1	Cre02.g142046	0.0065
Cre17.g702650.t1.1	Cre13.g577850	0.0071
Cre17.g702650.t1.1	Cre10.g457297	0.0073
Cre17.g702650.t1.1	Cre10.g457262	0.0073
Cre17.g702650.t1.1	Cre02.g074217	0.0074
Cre17.g702650.t1.1	Cre10.g437601	0.0075
Cre17.g702650.t1.1	Cre12.g498600	0.0078
Cre17.g702650.t1.1	Cre01.g023650	0.0079
Cre17.g702650.t1.1	Cre08.g358450	0.0082
Cre17.g702650.t1.1	Cre12.g561300	0.0085
Cre17.g702650.t1.1	Cre01.g042502	0.0087
Cre17.g702650.t1.1	Cre08.g382500	0.0088
Cre17.g702650.t1.1	Cre16.g680650	0.0088
Cre17.g702650.t1.1	Cre17.g731600	0.0088
Cre17.g702650.t1.1	Cre17.g731591	0.0088
Cre17.g702650.t1.1	Cre02.g086456	0.0089
Cre17.g702650.t1.1	Cre10.g434150	0.009
Cre17.g702650.t1.1	Cre10.g420550	0.009
Cre17.g702650.t1.1	Cre10.g420537	0.009
Cre17.g702650.t1.1	Cre16.g665650	0.0097
Cre17.g702650.t1.1	Cre06.g255550	0.0098
Cre17.g702650.t1.1	Cre16.g651300	0.01
Cre17.g702650.t1.1	Cre01.g071662	0.01
Cre17.g702650.t1.1	Cre01.g071297	0.01
Cre17.g702650.t1.1	Cre05.g233050	0.011
Cre17.g702650.t1.1	Cre03.g205585	0.011
Cre17.g702650.t1.1	Cre18.g749497	0.012
Cre17.g702650.t1.1	Cre18.g749447	0.012
Cre17.g702650.t1.1	Cre02.g073900	0.012
Cre17.g702650.t1.1	Cre12.g532900	0.012
Cre17.g702650.t1.1	Cre11.g468362	0.012
Cre17.g702650.t1.1	Cre03.g146887	0.013
Cre17.g702650.t1.1	Cre09.g410750	0.013
Cre17.g702650.t1.1	Cre11.g467663	0.014
Cre17.g702650.t1.1	Cre06.g257450	0.014
Cre17.g702650.t1.1	Cre17.g703932	0.014
Cre17.g702650.t1.1	Cre17.g703950	0.014
Cre17.g702650.t1.1	Cre06.g289300	0.014
Cre17.g702650.t1.1	Cre06.g289200	0.014
Cre17.g702650.t1.1	Cre17.g744047	0.014
Cre17.g702650.t1.1	Cre12.g539850	0.014
Cre17.g702650.t1.1	Cre11.g467620	0.014
Cre17.g702650.t1.1	Cre16.g664850	0.014
Cre17.g702650.t1.1	Cre03.g153306	0.014
Cre17.g702650.t1.1	Cre04.g231418	0.015
Cre17.g702650.t1.1	Cre17.g724873	0.015
Cre17.g702650.t1.1	Cre15.g638550	0.015
Cre17.g702650.t1.1	Cre10.g442950	0.015
Cre17.g702650.t1.1	Cre12.g539161	0.016
Cre17.g702650.t1.1	Cre04.g211600	0.016
Cre17.g702650.t1.1	Cre04.g211599	0.016
Cre17.g702650.t1.1	Cre02.g083273	0.016
Cre17.g702650.t1.1	Cre03.g210065	0.017
Cre17.g702650.t1.1	Cre03.g210177	0.017
Cre17.g702650.t1.1	Cre08.g373374	0.018
Cre17.g702650.t1.1	Cre16.g666627	0.018
Cre17.g702650.t1.1	Cre09.g400034	0.018
Cre17.g702650.t1.1	Cre06.g278286	0.018
Cre17.g702650.t1.1	Cre06.g278301	0.018
Cre17.g702650.t1.1	Cre02.g095036	0.018
Cre17.g702650.t1.1	Cre27.g757447	0.018
Cre17.g702650.t1.1	Cre01.g006600	0.018
Cre17.g702650.t1.1	Cre10.g445299	0.018
Cre17.g702650.t1.1	Cre10.g445226	0.018
Cre17.g702650.t1.1	Cre10.g445251	0.018
Cre17.g702650.t1.1	Cre04.g217986	0.018
Cre17.g702650.t1.1	Cre12.g539205	0.018
Cre17.g702650.t1.1	Cre04.g229300	0.018
Cre17.g702650.t1.1	Cre09.g416309	0.019
Cre17.g702650.t1.1	Cre01.g042650	0.019
Cre17.g702650.t1.1	Cre12.g528100	0.02
Cre17.g702650.t1.1	Cre02.g147300	0.021
Cre17.g702650.t1.1	Cre11.g467529	0.022
Cre17.g702650.t1.1	Cre10.g422450	0.022
Cre17.g702650.t1.1	Cre07.g312002	0.022
Cre17.g702650.t1.1	Cre13.g590450	0.022
Cre17.g702650.t1.1	Cre01.g023300	0.022
Cre17.g702650.t1.1	Cre16.g654450	0.022
Cre17.g702650.t1.1	Cre07.g353650	0.024
Cre17.g702650.t1.1	Cre07.g353600	0.024
Cre17.g702650.t1.1	Cre16.g695200	0.024
Cre17.g702650.t1.1	Cre03.g150101	0.024
Cre17.g702650.t1.1	Cre17.g696900	0.025
Cre17.g702650.t1.1	Cre13.g567700	0.025
Cre17.g702650.t1.1	Cre10.g445371	0.026
Cre17.g702650.t1.1	Cre04.g217987	0.026
Cre17.g702650.t1.1	Cre04.g217988	0.026
Cre17.g702650.t1.1	Cre05.g245350	0.027
Cre17.g702650.t1.1	Cre09.g389809	0.028
Cre17.g702650.t1.1	Cre12.g511400	0.028
Cre17.g702650.t1.1	Cre18.g748547	0.028
Cre17.g702650.t1.1	Cre09.g415350	0.029
Cre17.g702650.t1.1	Cre03.g193550	0.031
Cre17.g702650.t1.1	Cre12.g528600	0.033
Cre17.g702650.t1.1	Cre01.g006202	0.033
Cre17.g702650.t1.1	Cre09.g403950	0.034
Cre17.g702650.t1.1	Cre03.g200850	0.035
Cre17.g702650.t1.1	Cre17.g733752	0.035
Cre17.g702650.t1.1	Cre08.g358546	0.036
Cre17.g702650.t1.1	Cre08.g371751	0.036
Cre17.g702650.t1.1	Cre12.g558526	0.036
Cre17.g702650.t1.1	Cre10.g439550	0.037
Cre17.g702650.t1.1	Cre09.g386753	0.04
Cre17.g702650.t1.1	Cre09.g386754	0.04
Cre17.g702650.t1.1	Cre16.g678885	0.04
Cre17.g702650.t1.1	Cre24.g755247	0.04
Cre17.g702650.t1.1	Cre15.g642376	0.041
Cre17.g702650.t1.1	Cre06.g290950	0.041
Cre17.g702650.t1.1	Cre06.g278190	0.042
Cre17.g702650.t1.1	Cre11.g478350	0.043
Cre17.g702650.t1.1	Cre21.g752897	0.046
Cre17.g702650.t1.1	Cre04.g231124	0.046
Cre17.g702650.t1.1	Cre04.g214209	0.046
Cre17.g702650.t1.1	Cre04.g214097	0.046
Cre17.g702650.t1.1	Cre09.g411400	0.046
Cre17.g702650.t1.1	Cre05.g238200	0.048
Cre17.g702650.t1.1	Cre02.g144606	0.048
Cre17.g702650.t1.1	Cre02.g144550	0.048
Cre17.g702650.t1.1	Cre06.g255700	0.05
Cre17.g702650.t1.1	Cre03.g206550	0.05
Cre17.g702650.t1.1	Cre02.g087800	0.05
Cre17.g702650.t1.1	Cre12.g494052	0.051
Cre17.g702650.t1.1	Cre02.g074474	0.052
Cre17.g702650.t1.1	Cre16.g667200	0.052
Cre17.g702650.t1.1	Cre09.g386743	0.053
Cre17.g702650.t1.1	Cre03.g155976	0.054
Cre17.g702650.t1.1	Cre03.g155950	0.054
Cre17.g702650.t1.1	Cre06.g310150	0.055
Cre17.g702650.t1.1	Cre17.g716613	0.057
Cre17.g702650.t1.1	Cre17.g716625	0.057
Cre17.g702650.t1.1	Cre07.g349650	0.058
Cre17.g702650.t1.1	Cre17.g740323	0.058
Cre17.g702650.t1.1	Cre11.g467578	0.058
Cre17.g702650.t1.1	Cre06.g250902	0.06
Cre17.g702650.t1.1	Cre03.g198850	0.06
Cre17.g702650.t1.1	Cre03.g153650	0.067
Cre17.g702650.t1.1	Cre03.g153600	0.067
Cre17.g702650.t1.1	Cre09.g391726	0.068
Cre17.g702650.t1.1	Cre01.g043300	0.068
Cre17.g702650.t1.1	Cre09.g389986	0.069
Cre17.g702650.t1.1	Cre06.g309900	0.073
Cre17.g702650.t1.1	Cre03.g200450	0.074
Cre17.g702650.t1.1	Cre17.g710950	0.075
Cre17.g702650.t1.1	Cre17.g710900	0.075
Cre17.g702650.t1.1	Cre07.g331600	0.078
Cre17.g702650.t1.1	Cre09.g394350	0.078
Cre17.g702650.t1.1	Cre02.g115508	0.078
Cre17.g702650.t1.1	Cre09.g401626	0.081
Cre17.g702650.t1.1	Cre09.g411666	0.081
Cre17.g702650.t1.1	Cre09.g389050	0.082
Cre17.g702650.t1.1	Cre08.g379500	0.085
Cre17.g702650.t1.1	Cre03.g156650	0.087
Cre17.g702650.t1.1	Cre09.g399000	0.088
Cre17.g702650.t1.1	Cre09.g398950	0.088
Cre17.g702650.t1.1	Cre08.g373300	0.089
Cre17.g702650.t1.1	Cre14.g614650	0.089
Cre17.g702650.t1.1	Cre14.g614667	0.089
Cre17.g702650.t1.1	Cre10.g452850	0.09
Cre17.g702650.t1.1	Cre01.g001700	0.092
Cre17.g702650.t1.1	Cre11.g467530	0.093
Cre17.g702650.t1.1	Cre12.g489300	0.093
Cre17.g702650.t1.1	Cre13.g572350	0.094
Cre17.g702650.t1.1	Cre13.g572375	0.094
Cre17.g702650.t1.1	Cre02.g079004	0.097
Cre17.g702650.t1.1	Cre05.g236500	0.097
Cre17.g702650.t1.1	Cre05.g236450	0.097
Cre17.g702650.t1.1	Cre17.g738000	0.099
Cre17.g702650.t1.1	Cre01.g004400	0.099
Cre17.g702650.t1.1	Cre16.g689199	0.1
Cre17.g702650.t1.1	Cre06.g259900	0.1
Cre17.g702650.t1.1	Cre10.g454150	0.1
Cre17.g702650.t1.1	Cre14.g630775	0.1
Cre17.g702650.t1.1	Cre12.g515450	0.11
Cre17.g702650.t1.1	Cre02.g095153	0.11
Cre17.g702650.t1.1	Cre13.g576433	0.11
Cre17.g702650.t1.1	Cre13.g576466	0.11
Cre17.g702650.t1.1	Cre07.g327950	0.11
Cre17.g702650.t1.1	Cre06.g291250	0.11
Cre17.g702650.t1.1	Cre06.g291300	0.11
Cre17.g702650.t1.1	Cre16.g677738	0.11
Cre17.g702650.t1.1	Cre09.g398771	0.11
Cre17.g702650.t1.1	Cre12.g520500	0.11
Cre17.g702650.t1.1	Cre12.g520450	0.11
Cre17.g702650.t1.1	Cre13.g603850	0.12
Cre17.g702650.t1.1	Cre08.g373350	0.12
Cre17.g702650.t1.1	Cre14.g622270	0.12
Cre17.g702650.t1.1	Cre27.g757397	0.12
Cre17.g702650.t1.1	Cre21.g753097	0.12
Cre17.g702650.t1.1	Cre12.g530200	0.12
Cre17.g702650.t1.1	Cre14.g615300	0.12
Cre17.g702650.t1.1	Cre14.g615350	0.12
Cre17.g702650.t1.1	Cre21.g753197	0.13
Cre17.g702650.t1.1	Cre07.g344800	0.13
Cre17.g702650.t1.1	Cre06.g301725	0.13
Cre17.g702650.t1.1	Cre12.g550450	0.14
Cre17.g702650.t1.1	Cre12.g550501	0.14
Cre17.g702650.t1.1	Cre01.g014600	0.14
Cre17.g702650.t1.1	Cre08.g380250	0.14
Cre17.g702650.t1.1	Cre01.g041700	0.15
Cre17.g702650.t1.1	Cre06.g254450	0.15
Cre17.g702650.t1.1	Cre12.g552005	0.15
Cre17.g702650.t1.1	Cre02.g106600	0.15
Cre17.g702650.t1.1	Cre06.g261026	0.15
Cre17.g702650.t1.1	Cre05.g246800	0.16
Cre17.g702650.t1.1	Cre01.g013900	0.16
Cre17.g702650.t1.1	Cre07.g354700	0.16
Cre17.g702650.t1.1	Cre10.g424700	0.16
Cre17.g702650.t1.1	Cre10.g465757	0.16
Cre17.g702650.t1.1	Cre03.g148500	0.16
Cre17.g702650.t1.1	Cre03.g148450	0.16
Cre17.g702650.t1.1	Cre17.g742932	0.17
Cre17.g702650.t1.1	Cre10.g464300	0.18
Cre17.g702650.t1.1	Cre14.g612800	0.18
Cre17.g702650.t1.1	Cre02.g113450	0.18
Cre17.g702650.t1.1	Cre01.g041650	0.18
Cre17.g702650.t1.1	Cre01.g041667	0.18
Cre17.g702650.t1.1	Cre02.g089600	0.18
Cre17.g702650.t1.1	Cre04.g226700	0.18
Cre17.g702650.t1.1	Cre07.g312150	0.18
Cre17.g702650.t1.1	Cre19.g750597	0.19
Cre17.g702650.t1.1	Cre05.g232454	0.19
Cre17.g702650.t1.1	Cre01.g030968	0.19
Cre17.g702650.t1.1	Cre13.g583787	0.2
Cre17.g702650.t1.1	Cre06.g278285	0.2
Cre17.g702650.t1.1	Cre15.g641282	0.2
Cre17.g702650.t1.1	Cre01.g041100	0.2
Cre17.g702650.t1.1	Cre14.g621400	0.2
Cre17.g702650.t1.1	Cre16.g655430	0.2
Cre17.g702650.t1.1	Cre06.g264100	0.21
Cre17.g702650.t1.1	Cre07.g335250	0.21
Cre17.g702650.t1.1	Cre03.g194050	0.21
Cre17.g702650.t1.1	Cre02.g142226	0.23
Cre17.g702650.t1.1	Cre05.g231100	0.23
Cre17.g702650.t1.1	Cre05.g231050	0.23
Cre17.g702650.t1.1	Cre17.g728350	0.23
Cre17.g702650.t1.1	Cre17.g728300	0.23
Cre17.g702650.t1.1	Cre06.g278291	0.24
Cre17.g702650.t1.1	Cre03.g148250	0.24
Cre17.g702650.t1.1	Cre09.g386739	0.25
Cre17.g702650.t1.1	Cre12.g520800	0.25
Cre17.g702650.t1.1	Cre04.g220000	0.25
Cre17.g702650.t1.1	Cre17.g741650	0.25
Cre17.g702650.t1.1	Cre06.g278104	0.26
Cre17.g702650.t1.1	Cre06.g278105	0.26
Cre17.g702650.t1.1	Cre13.g568050	0.26
Cre17.g702650.t1.1	Cre16.g687050	0.27
Cre17.g702650.t1.1	Cre12.g492250	0.27
Cre17.g702650.t1.1	Cre12.g492200	0.27
Cre17.g702650.t1.1	Cre17.g713575	0.27
Cre17.g702650.t1.1	Cre07.g346917	0.27
Cre17.g702650.t1.1	Cre09.g386300	0.28
Cre17.g702650.t1.1	Cre01.g007051	0.28
Cre17.g702650.t1.1	Cre45.g760797	0.28
Cre17.g702650.t1.1	Cre22.g753397	0.29
Cre17.g702650.t1.1	Cre08.g373414	0.31
Cre17.g702650.t1.1	Cre06.g289950	0.32
Cre17.g702650.t1.1	Cre03.g204450	0.32
Cre17.g702650.t1.1	Cre16.g677026	0.32
Cre17.g702650.t1.1	Cre01.g010300	0.32
Cre17.g702650.t1.1	Cre12.g484834	0.33
Cre17.g702650.t1.1	Cre12.g484800	0.33
Cre17.g702650.t1.1	Cre09.g416750	0.33
Cre17.g702650.t1.1	Cre03.g163550	0.33
Cre17.g702650.t1.1	Cre03.g163600	0.33
Cre17.g702650.t1.1	Cre17.g735876	0.34
Cre17.g702650.t1.1	Cre11.g478128	0.34
Cre17.g702650.t1.1	Cre11.g478100	0.34
Cre17.g702650.t1.1	Cre04.g229026	0.35
Cre17.g702650.t1.1	Cre03.g149400	0.35
Cre17.g702650.t1.1	Cre09.g388763	0.35
Cre17.g702650.t1.1	Cre12.g539208	0.35
Cre17.g702650.t1.1	Cre03.g194100	0.35
Cre17.g702650.t1.1	Cre09.g401589	0.36
Cre17.g702650.t1.1	Cre01.g038400	0.36
Cre17.g702650.t1.1	Cre16.g658775	0.36
Cre17.g702650.t1.1	Cre01.g001685	0.37
Cre17.g702650.t1.1	Cre13.g573550	0.37
Cre17.g702650.t1.1	Cre02.g118400	0.37
Cre17.g702650.t1.1	Cre17.g698100	0.37
Cre17.g702650.t1.1	Cre17.g744497	0.37
Cre17.g702650.t1.1	Cre06.g294400	0.38
Cre17.g702650.t1.1	Cre16.g679109	0.39
Cre17.g702650.t1.1	Cre06.g278179	0.39
Cre17.g702650.t1.1	Cre02.g095112	0.39
Cre17.g702650.t1.1	Cre14.g630763	0.4
Cre17.g702650.t1.1	Cre16.g688633	0.4
Cre17.g702650.t1.1	Cre06.g270500	0.4
Cre17.g702650.t1.1	Cre12.g528750	0.41
Cre17.g702650.t1.1	Cre02.g115650	0.41
Cre17.g702650.t1.1	Cre07.g352251	0.42
Cre17.g702650.t1.1	Cre07.g352300	0.42
Cre17.g702650.t1.1	Cre02.g099550	0.43
Cre17.g702650.t1.1	Cre11.g467784	0.44
Cre17.g702650.t1.1	Cre10.g465550	0.46
Cre17.g702650.t1.1	Cre03.g205350	0.46
Cre17.g702650.t1.1	Cre03.g205400	0.46
Cre17.g702650.t1.1	Cre10.g461000	0.47
Cre17.g702650.t1.1	Cre09.g387986	0.48
Cre17.g702650.t1.1	Cre17.g746497	0.49
Cre17.g702650.t1.1	Cre02.g142346	0.49
Cre17.g702650.t1.1	Cre12.g495958	0.49
Cre17.g702650.t1.1	Cre01.g030550	0.49
Cre17.g702650.t1.1	Cre01.g044550	0.5
Cre17.g702650.t1.1	Cre02.g074400	0.5
Cre17.g702650.t1.1	Cre08.g366500	0.5
Cre17.g702650.t1.1	Cre08.g369950	0.5
Cre17.g702650.t1.1	Cre03.g203625	0.52
Cre17.g702650.t1.1	Cre06.g270050	0.52
Cre17.g702650.t1.1	Cre17.g743497	0.53
Cre17.g702650.t1.1	Cre14.g627917	0.54
Cre17.g702650.t1.1	Cre04.g219400	0.54
Cre17.g702650.t1.1	Cre17.g744097	0.55
Cre17.g702650.t1.1	Cre03.g150850	0.55
Cre17.g702650.t1.1	Cre03.g150800	0.55
Cre17.g702650.t1.1	Cre02.g100500	0.55
Cre17.g702650.t1.1	Cre02.g100450	0.55
Cre17.g702650.t1.1	Cre14.g620150	0.56
Cre17.g702650.t1.1	Cre15.g635700	0.57
Cre17.g702650.t1.1	Cre05.g236183	0.57
Cre17.g702650.t1.1	Cre05.g236216	0.57
Cre17.g702650.t1.1	Cre12.g537226	0.57
Cre17.g702650.t1.1	Cre03.g150767	0.58
Cre17.g702650.t1.1	Cre03.g150783	0.58
Cre17.g702650.t1.1	Cre17.g716500	0.58
Cre17.g702650.t1.1	Cre08.g383350	0.58
Cre17.g702650.t1.1	Cre03.g167712	0.59
Cre17.g702650.t1.1	Cre14.g611300	0.59
Cre17.g702650.t1.1	Cre16.g667701	0.6
Cre17.g702650.t1.1	Cre06.g278302	0.6
Cre17.g702650.t1.1	Cre13.g577800	0.6
Cre17.g702650.t1.1	Cre10.g459151	0.61
Cre17.g702650.t1.1	Cre10.g459100	0.61
Cre17.g702650.t1.1	Cre12.g537150	0.61
Cre17.g702650.t1.1	Cre02.g117781	0.62
Cre17.g702650.t1.1	Cre06.g278150	0.65
Cre17.g702650.t1.1	Cre21.g752147	0.65
Cre17.g702650.t1.1	Cre05.g232455	0.66
Cre17.g702650.t1.1	Cre03.g212977	0.67
Cre17.g702650.t1.1	Cre06.g254250	0.68
Cre17.g702650.t1.1	Cre01.g006766	0.68
Cre17.g702650.t1.1	Cre03.g153200	0.68
Cre17.g702650.t1.1	Cre15.g640400	0.7
Cre17.g702650.t1.1	Cre12.g510350	0.71
Cre17.g702650.t1.1	Cre12.g510300	0.71
Cre17.g702650.t1.1	Cre16.g690902	0.71
Cre17.g702650.t1.1	Cre17.g710879	0.72
Cre17.g702650.t1.1	Cre17.g710871	0.72
Cre17.g702650.t1.1	Cre17.g733850	0.75
Cre17.g702650.t1.1	Cre12.g520050	0.76
Cre17.g702650.t1.1	Cre09.g399775	0.76
Cre17.g702650.t1.1	Cre01.g006670	0.76
Cre17.g702650.t1.1	Cre07.g343250	0.76
Cre17.g702650.t1.1	Cre04.g215500	0.76
Cre17.g702650.t1.1	Cre04.g215550	0.76
Cre17.g702650.t1.1	Cre09.g413141	0.77
Cre17.g702650.t1.1	Cre03.g143707	0.77
Cre17.g702650.t1.1	Cre03.g143727	0.77
Cre17.g702650.t1.1	Cre01.g041400	0.79
Cre17.g702650.t1.1	Cre17.g738050	0.8
Cre17.g702650.t1.1	Cre12.g555152	0.84
Cre17.g702650.t1.1	Cre12.g555100	0.84
Cre17.g702650.t1.1	Cre02.g142353	0.85
Cre17.g702650.t1.1	Cre06.g278272	0.86
Cre17.g702650.t1.1	Cre09.g401108	0.87
Cre17.g702650.t1.1	Cre09.g416900	0.87
Cre17.g702650.t1.1	Cre11.g467665	0.87
Cre17.g702650.t1.1	Cre03.g192050	0.88
Cre17.g702650.t1.1	Cre03.g192100	0.88
Cre17.g702650.t1.1	Cre06.g249550	0.91
Cre17.g702650.t1.1	Cre06.g257476	0.91
Cre17.g702650.t1.1	Cre06.g293150	0.92
Cre17.g702650.t1.1	Cre03.g207100	0.96
Cre17.g702650.t1.1	Cre03.g188350	0.97
Cre17.g702650.t1.1	Cre15.g639552	0.97
Cre17.g702650.t1.1	Cre12.g550000	0.98
Cre17.g702650.t1.1	Cre12.g549950	0.98
Cre17.g702650.t1.1	Cre09.g396772	0.99
Cre17.g702650.t1.1	Cre02.g143900	0.99
Cre17.g702650.t1.1	Cre02.g079100	1
Cre17.g702650.t1.1	Cre05.g234892	1
Cre17.g702650.t1.1	Cre04.g217550	1
Cre17.g702650.t1.1	Cre15.g641875	1
Cre17.g702650.t1.1	Cre16.g676757	1
