# Supplementary material for: Characterization of the Nuclear Proteome of Chlamydomonas in Response to Salt Stress
Source: Preprints.org preprint supplement (doi:10.20944/preprints202206.0016.v1), 2022-06-01
Supplement: Supplementary file 4 [file TableS3_proteinGroups_NuclerProteome.xlsx]

## Sheet: proteinGroups (4)
Table S3. proteinGroups file output of MaxQuant analysis for nuclear proteome of C. reinhardtii in salt stress
Protein IDs	Majority protein IDs	Peptide counts (all)	Peptide counts (razor+unique)	Peptide counts (unique)	Fasta headers	Number of proteins	Peptides	Razor + unique peptides	Unique peptides	Peptides CTL1	Peptides CTL2	Peptides CTL3	Peptides TTM1	Peptides TTM2	Peptides TTM3	Razor + unique peptides CTL1	Razor + unique peptides CTL2	Razor + unique peptides CTL3	Razor + unique peptides TTM1	Razor + unique peptides TTM2	Razor + unique peptides TTM3	Unique peptides CTL1	Unique peptides CTL2	Unique peptides CTL3	Unique peptides TTM1	Unique peptides TTM2	Unique peptides TTM3	Sequence coverage [%]	Unique + razor sequence coverage [%]	Unique sequence coverage [%]	Mol. weight [kDa]	Sequence length	Sequence lengths	Q-value	Score	Identification type CTL1	Identification type CTL2	Identification type CTL3	Identification type TTM1	Identification type TTM2	Identification type TTM3	Sequence coverage CTL1 [%]	Sequence coverage CTL2 [%]	Sequence coverage CTL3 [%]	Sequence coverage TTM1 [%]	Sequence coverage TTM2 [%]	Sequence coverage TTM3 [%]	Intensity	Intensity CTL1
CON__P00761	CON__P00761	4	4	4		1	4	4	4	4	4	3	4	3	4	4	4	3	4	3	4	4	4	3	4	3	4	25.1	25.1	25.1	24.409	231	231	0	58.207	By MS/MS	By MS/MS	By MS/MS	By MS/MS	By MS/MS	By MS/MS	25.1	25.1	16.5	25.1	21.6	25.1	10919000	2613400
CON__P04264;CON__Q8BGZ7;CON__P50446;CON__Q922U2;CON__Q5XQN5	CON__P04264	5;1;1;1;1	5;1;1;1;1	5;1;1;1;1		5	5	5	5	3	2	4	3	4	3	3	2	4	3	4	3	3	2	4	3	4	3	9.8	9.8	9.8	66.017	644	644;551;553;580;601	0	35.812	By MS/MS	By MS/MS	By MS/MS	By MS/MS	By MS/MS	By MS/MS	7	3.1	6.1	4.5	6.1	4.5	1134800	128770
CON__P35527	CON__P35527	2	2	2		1	2	2	2	0	1	1	1	2	0	0	1	1	1	2	0	0	1	1	1	2	0	8.8	8.8	8.8	62.129	623	623	0.0021459	11.103		By matching	By matching	By matching	By MS/MS		0	3.7	3.7	3.7	8.8	0	59406	0
CON__P35908v2;CON__P35908;CON__Q8VED5;CON__Q5XKE5;CON__O95678;CON__P48668;CON__P04259;CON__P02538;CON__P13647	CON__P35908v2;CON__P35908	3;3;1;1;1;1;1;1;1	3;3;1;1;1;1;1;1;1	3;3;1;1;1;1;1;1;1	;	9	3	3	3	2	2	2	3	3	1	2	2	2	3	3	1	2	2	2	3	3	1	4.9	4.9	4.9	65.432	639	639;645;531;535;551;564;564;564;590	0	18.325	By MS/MS	By matching	By MS/MS	By MS/MS	By MS/MS	By MS/MS	3.3	3	3.3	4.9	4.9	1.4	360830	71000
Cre01.g001100.t1.2	Cre01.g001100.t1.2	3	3	3	Cre01.g001100.t1.2 pacid=30788546 annot-version=v5.5	1	3	3	3	3	2	2	0	3	2	3	2	2	0	3	2	3	2	2	0	3	2	6.8	6.8	6.8	69.963	681	681	0	20.083	By MS/MS	By MS/MS	By matching		By MS/MS	By matching	6.8	3.5	3.5	0	6.8	3.5	237350	100760
Cre01.g003487.t1.1	Cre01.g003487.t1.1	3	3	3	Cre01.g003487.t1.1 pacid=30789160 annot-version=v5.5	1	3	3	3	3	3	1	3	2	2	3	3	1	3	2	2	3	3	1	3	2	2	12	12	12	58.683	541	541	0	19.316	By MS/MS	By MS/MS	By MS/MS	By MS/MS	By MS/MS	By MS/MS	12	12	2.8	12	6.1	6.1	453800	151210
Cre01.g005813.t1.2	Cre01.g005813.t1.2	16	16	16	Cre01.g005813.t1.2 pacid=30789701 annot-version=v5.5	1	16	16	16	16	13	14	12	8	6	16	13	14	12	8	6	16	13	14	12	8	6	32.8	32.8	32.8	70.392	662	662	0	118.75	By MS/MS	By MS/MS	By MS/MS	By MS/MS	By MS/MS	By MS/MS	32.8	29.3	31.9	25.8	17.1	12.2	3001200	1178500
Cre01.g009250.t1.1	Cre01.g009250.t1.1	13	13	13	Cre01.g009250.t1.1 pacid=30789357 gene-symbol=TOP2 definition=DNA topoisomerase II annot-version=v5.5	1	13	13	13	11	12	10	5	9	13	11	12	10	5	9	13	11	12	10	5	9	13	13	13	13	176.72	1626	1626	0	101.12	By MS/MS	By MS/MS	By MS/MS	By MS/MS	By MS/MS	By MS/MS	11.3	12.1	9.7	4.8	9.5	13	3473000	1232600
Cre01.g010400.t1.2	Cre01.g010400.t1.2	6	6	6	Cre01.g010400.t1.2 pacid=30788845 gene-symbol=FAP380 definition=Flagellar Associated Membrane Protein 380 annot-version=v5.5	1	6	6	6	6	3	3	6	4	4	6	3	3	6	4	4	6	3	3	6	4	4	27.3	27.3	27.3	20.398	187	187	0	55.109	By MS/MS	By MS/MS	By MS/MS	By MS/MS	By MS/MS	By MS/MS	27.3	20.9	20.9	27.3	23.5	27.3	1869300	1035500
Cre01.g010900.t1.2	Cre01.g010900.t1.2	8	8	8	Cre01.g010900.t1.2 pacid=30788366 gene-symbol=GAP3 definition=Glyceraldehyde-3-Phosphate Dehydrogenase annot-version=v5.5	1	8	8	8	6	6	7	4	5	3	6	6	7	4	5	3	6	6	7	4	5	3	29.7	29.7	29.7	40.304	374	374	0	52.613	By MS/MS	By MS/MS	By MS/MS	By MS/MS	By MS/MS	By MS/MS	21.4	23.3	25.1	12.3	16.6	8.3	1198000	338410
Cre01.g011000.t1.2	Cre01.g011000.t1.2	3	3	3	Cre01.g011000.t1.2 pacid=30788989 gene-symbol=RPL6 definition=Cytosolic 80S ribosomal protein L6 annot-version=v5.5	1	3	3	3	3	3	2	2	2	2	3	3	2	2	2	2	3	3	2	2	2	2	14.8	14.8	14.8	24.371	223	223	0	34.641	By MS/MS	By MS/MS	By MS/MS	By MS/MS	By MS/MS	By MS/MS	14.8	14.8	12.1	12.1	12.1	12.1	694720	256100
Cre01.g013650.t1.1	Cre01.g013650.t1.1	3	3	3	Cre01.g013650.t1.1 pacid=30789705 annot-version=v5.5	1	3	3	3	3	3	2	1	3	3	3	3	2	1	3	3	3	3	2	1	3	3	2.1	2.1	2.1	161.84	1546	1546	0	21.559	By MS/MS	By MS/MS	By MS/MS	By matching	By MS/MS	By MS/MS	2.1	2.1	2.1	1.1	2.1	2.1	828300	351130
Cre01.g013800.t1.1	Cre01.g013800.t1.1	2	2	2	Cre01.g013800.t1.1 pacid=30788303 gene-symbol=TCY1 definition=Tocopherol cyclase annot-version=v5.5	1	2	2	2	2	1	2	1	2	2	2	1	2	1	2	2	2	1	2	1	2	2	3.7	3.7	3.7	68.288	682	682	0	14.786	By MS/MS	By MS/MS	By MS/MS	By MS/MS	By MS/MS	By matching	3.7	1.9	3.7	1.9	3.7	3.7	276680	53309
Cre01.g016050.t1.2	Cre01.g016050.t1.2	9	9	9	Cre01.g016050.t1.2 pacid=30789071 gene-symbol=PRP8 definition=Splicing factor, component of the U5 snRNP and of the spliceosome annot-version=v5.5	1	9	9	9	7	8	8	3	2	1	7	8	8	3	2	1	7	8	8	3	2	1	5.5	5.5	5.5	278.16	2398	2398	0	60.931	By MS/MS	By MS/MS	By MS/MS	By matching	By matching	By matching	5.1	5.5	5.5	2.2	1.3	0.5	1475600	555540
Cre01.g018000.t1.1	Cre01.g018000.t1.1	6	6	6	Cre01.g018000.t1.1 pacid=30788815 gene-symbol=RPA12 definition=DNA-directed RNA polymerase I subunit A12.2 annot-version=v5.5	1	6	6	6	6	6	4	4	6	6	6	6	4	4	6	6	6	6	4	4	6	6	41.1	41.1	41.1	14.404	124	124	0	43.41	By MS/MS	By MS/MS	By MS/MS	By MS/MS	By MS/MS	By MS/MS	41.1	41.1	32.3	33.9	41.1	41.1	3298900	1194100
Cre01.g019200.t1.1	Cre01.g019200.t1.1	2	2	2	Cre01.g019200.t1.1 pacid=30788766 gene-symbol=NOP52 definition=RRP1-like protein annot-version=v5.5	1	2	2	2	1	2	2	1	1	2	1	2	2	1	1	2	1	2	2	1	1	2	3.4	3.4	3.4	67.386	643	643	0	12.925	By matching	By MS/MS	By MS/MS	By MS/MS	By MS/MS	By MS/MS	1.6	3.4	3.4	1.9	1.9	3.4	265740	33468
Cre01.g019750.t1.1	Cre01.g019750.t1.1	2	2	2	Cre01.g019750.t1.1 pacid=30789216 annot-version=v5.5	1	2	2	2	2	2	1	1	2	2	2	2	1	1	2	2	2	2	1	1	2	2	3.6	3.6	3.6	76.01	692	692	0	13.104	By MS/MS	By MS/MS	By MS/MS	By MS/MS	By MS/MS	By MS/MS	3.6	3.6	1.4	1.4	3.6	3.6	505330	158660
Cre01.g020050.t1.1	Cre01.g020050.t1.1	2	2	2	Cre01.g020050.t1.1 pacid=30788910 annot-version=v5.5	1	2	2	2	2	2	1	1	1	0	2	2	1	1	1	0	2	2	1	1	1	0	3	3	3	95.054	870	870	0	15.14	By MS/MS	By MS/MS	By MS/MS	By MS/MS	By matching		3	3	1.8	1.8	1.8	0	209470	102820
Cre01.g020950.t1.2	Cre01.g020950.t1.2	10	10	10	Cre01.g020950.t1.2 pacid=30788544 annot-version=v5.5	1	10	10	10	7	8	8	7	9	5	7	8	8	7	9	5	7	8	8	7	9	5	30.8	30.8	30.8	42.152	406	406	0	71.055	By MS/MS	By MS/MS	By MS/MS	By MS/MS	By MS/MS	By MS/MS	21.9	25.4	24.9	19.2	28.1	14.5	3157600	581090
Cre01.g021400.t1.2	Cre01.g021400.t1.2	3	3	3	Cre01.g021400.t1.2 pacid=30789181 definition=Pre-mRNA splicing factor annot-version=v5.5	1	3	3	3	2	3	2	3	3	2	2	3	2	3	3	2	2	3	2	3	3	2	3.7	3.7	3.7	62.905	545	545	0	16.157	By MS/MS	By MS/MS	By MS/MS	By MS/MS	By MS/MS	By MS/MS	3.5	3.7	3.7	3.7	3.7	3.5	282720	70819
Cre01.g021600.t1.2	Cre01.g021600.t1.2	14	14	14	Cre01.g021600.t1.2 pacid=30789366 gene-symbol=HEL1 definition=DEAD-box RNA helicase annot-version=v5.5	1	14	14	14	13	11	10	4	9	8	13	11	10	4	9	8	13	11	10	4	9	8	26	26	26	66.394	623	623	0	106.29	By MS/MS	By MS/MS	By MS/MS	By MS/MS	By MS/MS	By MS/MS	24.1	22.6	20.4	10.6	20.4	18.5	3226900	1392600
Cre01.g022350.t1.2	Cre01.g022350.t1.2	2	2	2	Cre01.g022350.t1.2 pacid=30788877 gene-symbol=HEL3 definition=DEAH box ATP-dependent RNA helicase annot-version=v5.5	1	2	2	2	2	2	2	2	1	0	2	2	2	2	1	0	2	2	2	2	1	0	1.9	1.9	1.9	149.57	1459	1459	0	13.301	By MS/MS	By MS/MS	By MS/MS	By MS/MS	By matching		1.9	1.9	1.9	1.9	0.8	0	269500	97157
Cre01.g025450.t1.2	Cre01.g025450.t1.2	4	4	4	Cre01.g025450.t1.2 pacid=30788405 gene-symbol=DRC9 definition=Nexin-dynein regulatory complex 9 annot-version=v5.5	1	4	4	4	3	3	3	1	0	0	3	3	3	1	0	0	3	3	3	1	0	0	10.8	10.8	10.8	46.397	406	406	0	23.503	By MS/MS	By MS/MS	By MS/MS	By MS/MS			9.4	6.9	9.4	3	0	0	326490	129980
Cre01.g026450.t1.2	Cre01.g026450.t1.2	21	21	21	Cre01.g026450.t1.2 pacid=30788658 gene-symbol=SRS1 definition=Serine/arginine-rich pre-mRNA splicing factor annot-version=v5.5	1	21	21	21	19	19	16	20	12	12	19	19	16	20	12	12	19	19	16	20	12	12	41.4	41.4	41.4	35.215	338	338	0	218.43	By MS/MS	By MS/MS	By MS/MS	By MS/MS	By MS/MS	By MS/MS	38.2	34.3	32	34.3	29.9	30.5	23587000	8888900
Cre01.g029750.t1.1	Cre01.g029750.t1.1	3	3	3	Cre01.g029750.t1.1 pacid=30789698 gene-symbol=DAAK1 definition= ODA5-Associated Adenylate Kinase annot-version=v5.5	1	3	3	3	3	2	0	0	0	0	3	2	0	0	0	0	3	2	0	0	0	0	16.9	16.9	16.9	187.57	1747	1747	0	17.93	By MS/MS	By MS/MS					16.9	10.1	0	0	0	0	91908	78803
Cre01.g032250.t1.1	Cre01.g032250.t1.1	4	4	4	Cre01.g032250.t1.1 pacid=30788667 annot-version=v5.5	1	4	4	4	4	4	2	3	2	2	4	4	2	3	2	2	4	4	2	3	2	2	10.3	10.3	10.3	53.977	496	496	0	43.877	By MS/MS	By MS/MS	By MS/MS	By MS/MS	By MS/MS	By MS/MS	10.3	10.3	6	10.3	8.7	8.7	755740	345070
Cre01.g032300.t1.2	Cre01.g032300.t1.2	9	9	9	Cre01.g032300.t1.2 pacid=30789208 gene-symbol=GBP1 definition=G-strand telomere binding protein annot-version=v5.5	1	9	9	9	7	7	5	8	4	8	7	7	5	8	4	8	7	7	5	8	4	8	43.9	43.9	43.9	24.06	221	221	0	59.107	By MS/MS	By MS/MS	By MS/MS	By MS/MS	By MS/MS	By MS/MS	38	38.5	28.5	35.7	15.8	35.7	4211700	1583000
Cre01.g034950.t1.2	Cre01.g034950.t1.2	10	10	10	Cre01.g034950.t1.2 pacid=30788752 annot-version=v5.5	1	10	10	10	7	5	6	4	4	7	7	5	6	4	4	7	7	5	6	4	4	7	15.5	15.5	15.5	82.474	740	740	0	73.425	By MS/MS	By MS/MS	By MS/MS	By MS/MS	By MS/MS	By MS/MS	12.3	9.5	8.5	7	8.1	11.9	2181300	495330
Cre01.g035000.t1.2	Cre01.g035000.t1.2	3	3	3	Cre01.g035000.t1.2 pacid=30789536 annot-version=v5.5	1	3	3	3	3	2	2	2	1	1	3	2	2	2	1	1	3	2	2	2	1	1	8.5	8.5	8.5	55.669	528	528	0	17.793	By MS/MS	By MS/MS	By MS/MS	By MS/MS	By MS/MS	By MS/MS	8.5	5.1	5.1	5.3	1.9	1.9	269960	100000
Cre01.g036600.t1.2	Cre01.g036600.t1.2	9	9	9	Cre01.g036600.t1.2 pacid=30789506 gene-symbol=EXN3 definition=Exoribonuclease II annot-version=v5.5	1	9	9	9	6	9	9	6	3	6	6	9	9	6	3	6	6	9	9	6	3	6	19.4	19.4	19.4	73.564	708	708	0	84.888	By MS/MS	By MS/MS	By MS/MS	By MS/MS	By MS/MS	By MS/MS	13.7	19.4	19.4	16.7	11.3	16.7	1712800	542270
Cre01.g038650.t1.2	Cre01.g038650.t1.2	9	9	9	Cre01.g038650.t1.2 pacid=30788508 gene-symbol=SRS2 definition=Serine/arginine-rich pre-mRNA splicing factor annot-version=v5.5	1	9	9	9	8	9	8	9	8	8	8	9	8	9	8	8	8	9	8	9	8	8	31.7	31.7	31.7	31.126	271	271	0	123.73	By MS/MS	By MS/MS	By MS/MS	By MS/MS	By MS/MS	By MS/MS	31.7	31.7	30.3	31.7	31.7	31.7	8681200	3253600
Cre01.g039250.t2.1;Cre01.g039250.t1.1	Cre01.g039250.t2.1;Cre01.g039250.t1.1	5;5	5;5	5;5	Cre01.g039250.t2.1 pacid=30788561 gene-symbol=RPS2 definition=Cytosolic 80S ribosomal protein S2 annot-version=v5.5;Cre01.g039250.t1.1 pacid=30788560 gene-symbol=RPS2 definition=Cytosolic 80S ribosomal protein S2 annot-version=v5.5	2	5	5	5	5	5	5	4	2	3	5	5	5	4	2	3	5	5	5	4	2	3	14.7	14.7	14.7	31.676	286	286;286	0	33.382	By MS/MS	By MS/MS	By MS/MS	By MS/MS	By MS/MS	By MS/MS	14.7	14.7	14.7	12.2	6.6	9.1	1795600	544690
Cre01.g040000.t1.2	Cre01.g040000.t1.2	10	10	10	Cre01.g040000.t1.2 pacid=30788495 gene-symbol=RPL26 definition=Cytosolic 80S ribosomal protein L26 annot-version=v5.5	1	10	10	10	8	9	8	10	8	9	8	9	8	10	8	9	8	9	8	10	8	9	55.9	55.9	55.9	16.473	145	145	0	89.492	By MS/MS	By MS/MS	By MS/MS	By MS/MS	By MS/MS	By MS/MS	53.1	53.1	48.3	55.9	48.3	51	6662400	1773600
Cre01.g044800.t1.2	Cre01.g044800.t1.2	5	5	5	Cre01.g044800.t1.2 pacid=30789628 gene-symbol=PFL1 definition=Pyruvate-formate lyase annot-version=v5.5	1	5	5	5	4	5	3	4	0	2	4	5	3	4	0	2	4	5	3	4	0	2	6.4	6.4	6.4	91.104	830	830	0	30.958	By MS/MS	By MS/MS	By MS/MS	By MS/MS		By MS/MS	6.3	6.4	4.7	4.5	0	3.3	541590	193090
Cre01.g047750.t1.2	Cre01.g047750.t1.2	3	3	3	Cre01.g047750.t1.2 pacid=30789695 gene-symbol=RPL18A definition=Cytosolic 80S ribosomal protein L18a annot-version=v5.5	1	3	3	3	3	3	3	3	3	3	3	3	3	3	3	3	3	3	3	3	3	3	18.1	18.1	18.1	21.371	182	182	0	20.965	By MS/MS	By MS/MS	By MS/MS	By MS/MS	By MS/MS	By MS/MS	18.1	18.1	18.1	18.1	18.1	18.1	1211900	319660
Cre01.g048000.t1.1	Cre01.g048000.t1.1	2	2	2	Cre01.g048000.t1.1 pacid=30789135 annot-version=v5.5	1	2	2	2	2	0	1	1	0	0	2	0	1	1	0	0	2	0	1	1	0	0	1.8	1.8	1.8	193.25	1818	1818	0	12.277	By MS/MS		By MS/MS	By MS/MS			1.8	0	0.8	0.8	0	0	101100	68196
Cre01.g048150.t1.2	Cre01.g048150.t1.2	29	29	29	Cre01.g048150.t1.2 pacid=30788391 gene-symbol=HLA8 definition=Transcriptional co-activator/nuclease induced by high light annot-version=v5.5	1	29	29	29	29	29	26	27	23	26	29	29	26	27	23	26	29	29	26	27	23	26	64.5	64.5	64.5	30.466	290	290	0	323.31	By MS/MS	By MS/MS	By MS/MS	By MS/MS	By MS/MS	By MS/MS	64.5	64.5	60.3	64.1	62.1	63.4	51186000	14793000
Cre01.g051100.t1.2	Cre01.g051100.t1.2	10	10	10	Cre01.g051100.t1.2 pacid=30788938 annot-version=v5.5	1	10	10	10	10	10	9	6	8	4	10	10	9	6	8	4	10	10	9	6	8	4	26.9	26.9	26.9	73.643	684	684	0	88.297	By MS/MS	By MS/MS	By MS/MS	By MS/MS	By MS/MS	By MS/MS	26.9	26.9	22.7	14.6	21.9	9.1	5152600	1575300
Cre01.g055400.t1.2	Cre01.g055400.t1.2	12	12	12	Cre01.g055400.t1.2 pacid=30789023 annot-version=v5.5	1	12	12	12	12	10	9	11	5	9	12	10	9	11	5	9	12	10	9	11	5	9	30.6	30.6	30.6	39.884	360	360	0	89.694	By MS/MS	By MS/MS	By MS/MS	By MS/MS	By MS/MS	By MS/MS	30.6	26.9	21.7	30.6	20.3	29.2	3397300	1008500
Cre01.g062172.t1.1	Cre01.g062172.t1.1	12	7	7	Cre01.g062172.t1.1 pacid=30789439 gene-symbol=HBV1 definition=Histone H2B variant annot-version=v5.5	1	12	7	7	12	12	8	9	10	12	7	7	4	6	6	7	7	7	4	6	6	7	77.7	55.4	55.4	13.296	121	121	0	97.598	By MS/MS	By MS/MS	By MS/MS	By MS/MS	By MS/MS	By MS/MS	77.7	77.7	69.4	69.4	71.9	77.7	17711000	6658200
Cre01.g068377.t1.1	Cre01.g068377.t1.1	2	2	2	Cre01.g068377.t1.1 pacid=30788462 annot-version=v5.5	1	2	2	2	1	2	1	0	0	0	1	2	1	0	0	0	1	2	1	0	0	0	4.9	4.9	4.9	70.774	680	680	0	13.172	By matching	By MS/MS	By matching				2.2	4.9	2.2	0	0	0	50133	21536
Cre01.g070567.t1.1	Cre01.g070567.t1.1	3	3	3	Cre01.g070567.t1.1 pacid=30789058 annot-version=v5.5	1	3	3	3	3	2	3	2	2	2	3	2	3	2	2	2	3	2	3	2	2	2	10.3	10.3	10.3	52.165	487	487	0	28.925	By MS/MS	By MS/MS	By MS/MS	By MS/MS	By MS/MS	By MS/MS	10.3	6.6	10.3	6.6	6.6	6.6	935870	327240
Cre02.g073650.t2.1;Cre02.g073650.t1.2	Cre02.g073650.t2.1;Cre02.g073650.t1.2	6;6	6;6	6;6	Cre02.g073650.t2.1 pacid=30785081 gene-symbol=PRP19 definition=Spliceosome Component, nuclear pre-mRNA splicing factor annot-version=v5.5;Cre02.g073650.t1.2 pacid=30785080 gene-symbol=PRP19 definition=Spliceosome Component, nuclear pre-mRNA sp	2	6	6	6	5	6	4	4	5	2	5	6	4	4	5	2	5	6	4	4	5	2	18.1	18.1	18.1	53.945	503	503;503	0	74.309	By MS/MS	By MS/MS	By MS/MS	By MS/MS	By MS/MS	By MS/MS	15.7	18.1	15.1	15.1	15.7	8	2889500	1014200
Cre02.g074300.t1.1	Cre02.g074300.t1.1	2	2	2	Cre02.g074300.t1.1 pacid=30785357 annot-version=v5.5	1	2	2	2	2	1	1	0	2	1	2	1	1	0	2	1	2	1	1	0	2	1	1	1	1	341.09	3476	3476	0	11.504	By MS/MS	By MS/MS	By matching		By MS/MS	By MS/MS	1	0.7	0.3	0	1	0.3	135470	51817
Cre02.g075650.t1.2	Cre02.g075650.t1.2	12	12	12	Cre02.g075650.t1.2 pacid=30785327 annot-version=v5.5	1	12	12	12	11	11	10	3	5	5	11	11	10	3	5	5	11	11	10	3	5	5	38.1	38.1	38.1	44.363	417	417	0	95.718	By MS/MS	By MS/MS	By MS/MS	By MS/MS	By MS/MS	By MS/MS	38.1	38.1	38.1	8.9	18.5	18.5	2555600	771600
Cre02.g075700.t1.2	Cre02.g075700.t1.2	8	8	8	Cre02.g075700.t1.2 pacid=30785746 gene-symbol=RPL19 definition=Cytosolic 80S ribosomal protein L19 annot-version=v5.5	1	8	8	8	8	8	6	6	4	8	8	8	6	6	4	8	8	8	6	6	4	8	25	25	25	23.427	200	200	0	82.633	By MS/MS	By MS/MS	By MS/MS	By MS/MS	By MS/MS	By MS/MS	25	25	20	19.5	19	25	3494700	1241200
Cre02.g077300.t1.2	Cre02.g077300.t1.2	16	16	16	Cre02.g077300.t1.2 pacid=30785723 gene-symbol=NOP1 definition=Nucleolar protein, Component of C/D snoRNPs annot-version=v5.5	1	16	16	16	13	11	12	12	10	13	13	11	12	12	10	13	13	11	12	12	10	13	51.7	51.7	51.7	33.035	315	315	0	165.7	By MS/MS	By MS/MS	By MS/MS	By MS/MS	By MS/MS	By MS/MS	47.9	38.7	43.2	39.4	35.6	47	20737000	6509400
Cre02.g079550.t1.2	Cre02.g079550.t1.2	3	3	3	Cre02.g079550.t1.2 pacid=30786344 gene-symbol=DRP2 definition=Dynamin-related GTPase, involved in circadian rhythms annot-version=v5.5	1	3	3	3	1	3	0	3	2	1	1	3	0	3	2	1	1	3	0	3	2	1	6	6	6	91.229	868	868	0	90.495	By MS/MS	By MS/MS		By MS/MS	By MS/MS	By MS/MS	1.6	6	0	6	4.4	1.6	628990	52561
Cre02.g080700.t1.2;Cre02.g080600.t1.2	Cre02.g080700.t1.2;Cre02.g080600.t1.2	6;5	6;5	5;4	Cre02.g080700.t1.2 pacid=30785571 gene-symbol=BIP1 definition=Endoplasmic reticulum associated Hsp70 protein annot-version=v5.5;Cre02.g080600.t1.2 pacid=30785719 gene-symbol=BIP2 definition=Endoplasmic reticulum associated Hsp70 protein annot	2	6	6	5	6	6	5	4	4	4	6	6	5	4	4	4	5	5	4	3	3	3	13	13	10.4	72.492	656	656;686	0	44.828	By MS/MS	By MS/MS	By MS/MS	By MS/MS	By MS/MS	By MS/MS	13	13	11	9.6	9.6	9.1	1387000	479210
Cre02.g081050.t1.2	Cre02.g081050.t1.2	12	12	12	Cre02.g081050.t1.2 pacid=30785944 gene-symbol=FAP24 definition=Flagellar Associated Protein 24 annot-version=v5.5	1	12	12	12	11	8	8	7	3	6	11	8	8	7	3	6	11	8	8	7	3	6	26.8	26.8	26.8	55.891	529	529	0	94.342	By MS/MS	By MS/MS	By MS/MS	By MS/MS	By MS/MS	By MS/MS	25.7	21.7	19.3	14.9	6	18.9	3556300	2039600
Cre02.g081250.t1.2	Cre02.g081250.t1.2	18	18	18	Cre02.g081250.t1.2 pacid=30785406 annot-version=v5.5	1	18	18	18	17	15	14	8	16	13	17	15	14	8	16	13	17	15	14	8	16	13	26.1	26.1	26.1	78.425	763	763	0	125.09	By MS/MS	By MS/MS	By MS/MS	By MS/MS	By MS/MS	By MS/MS	26.1	20.2	22.3	11.4	24.5	20.6	6643700	1959600
Cre02.g082300.t1.2	Cre02.g082300.t1.2	2	2	2	Cre02.g082300.t1.2 pacid=30785962 gene-symbol=SUR6 definition=Surfeit 6-like protein annot-version=v5.5	1	2	2	2	1	1	1	0	2	0	1	1	1	0	2	0	1	1	1	0	2	0	3.7	3.7	3.7	44.689	408	408	0.0021645	11.193	By MS/MS	By MS/MS	By matching		By MS/MS		2.5	2.5	2.5	0	3.7	0	67162	29446
Cre02.g082500.t1.1	Cre02.g082500.t1.1	2	2	2	Cre02.g082500.t1.1 pacid=30786029 gene-symbol=PSAN definition=Photosystem I reaction center subunit N annot-version=v5.5	1	2	2	2	1	1	1	2	1	1	1	1	1	2	1	1	1	1	1	2	1	1	16.5	16.5	16.5	14.804	139	139	0	14.364	By matching	By matching	By MS/MS	By MS/MS	By matching	By MS/MS	7.2	7.2	7.2	16.5	7.2	7.2	267810	68480
Cre02.g084000.t1.2	Cre02.g084000.t1.2	3	3	3	Cre02.g084000.t1.2 pacid=30785732 annot-version=v5.5	1	3	3	3	3	3	3	2	2	1	3	3	3	2	2	1	3	3	3	2	2	1	33.3	33.3	33.3	12.964	120	120	0	22.866	By MS/MS	By MS/MS	By MS/MS	By MS/MS	By MS/MS	By MS/MS	33.3	33.3	33.3	25	15	8.3	723170	306570
Cre02.g084600.t1.2	Cre02.g084600.t1.2	11	11	11	Cre02.g084600.t1.2 pacid=30786042 annot-version=v5.5	1	11	11	11	9	7	8	8	8	11	9	7	8	8	8	11	9	7	8	8	8	11	43.1	43.1	43.1	33.97	327	327	0	95.395	By MS/MS	By MS/MS	By MS/MS	By MS/MS	By MS/MS	By MS/MS	33.3	33.9	40.1	33	36.7	43.1	3523100	1217500
Cre02.g084750.t2.1;Cre02.g084750.t1.1	Cre02.g084750.t2.1;Cre02.g084750.t1.1	27;27	27;27	27;27	Cre02.g084750.t2.1 pacid=30784877 annot-version=v5.5;Cre02.g084750.t1.1 pacid=30784876 annot-version=v5.5	2	27	27	27	23	24	18	20	17	22	23	24	18	20	17	22	23	24	18	20	17	22	48.1	48.1	48.1	81.646	801	801;802	0	207.69	By MS/MS	By MS/MS	By MS/MS	By MS/MS	By MS/MS	By MS/MS	44.4	43.3	34.6	37.2	30.5	39.6	6271500	1651100
Cre02.g088900.t1.2	Cre02.g088900.t1.2	4	4	4	Cre02.g088900.t1.2 pacid=30785043 gene-symbol=PRPL1 definition=Chloroplast ribosomal protein L1 annot-version=v5.5	1	4	4	4	3	1	1	4	1	3	3	1	1	4	1	3	3	1	1	4	1	3	16.2	16.2	16.2	32.439	297	297	0	25.779	By MS/MS	By matching	By MS/MS	By MS/MS	By MS/MS	By MS/MS	12.5	4.7	3.7	16.2	3.4	11.8	302640	59090
Cre02.g091100.t1.2	Cre02.g091100.t1.2	2	2	2	Cre02.g091100.t1.2 pacid=30785346 gene-symbol=RPL15 definition=Cytosolic 80S ribosomal protein L15 annot-version=v5.5	1	2	2	2	2	2	2	1	0	1	2	2	2	1	0	1	2	2	2	1	0	1	11.2	11.2	11.2	27.157	232	232	0	18.367	By MS/MS	By MS/MS	By MS/MS	By MS/MS		By matching	11.2	11.2	11.2	8.2	0	8.2	396170	104430
Cre02.g091700.t1.2	Cre02.g091700.t1.2	5	5	5	Cre02.g091700.t1.2 pacid=30785960 gene-symbol=RIB72 definition=Protofilament ribbon protein of flagellar microtubules annot-version=v5.5	1	5	5	5	5	4	3	1	0	1	5	4	3	1	0	1	5	4	3	1	0	1	13.9	13.9	13.9	71.985	635	635	0	38.94	By MS/MS	By MS/MS	By MS/MS	By matching		By matching	13.9	12	7.4	2.8	0	2.8	618320	342780
Cre02.g095146.t1.1	Cre02.g095146.t1.1	14	14	14	Cre02.g095146.t1.1 pacid=30786134 annot-version=v5.5	1	14	14	14	14	14	12	11	11	11	14	14	12	11	11	11	14	14	12	11	11	11	48.1	48.1	48.1	31.339	285	285	0	171.62	By MS/MS	By MS/MS	By MS/MS	By MS/MS	By MS/MS	By MS/MS	48.1	48.1	48.1	45.3	48.1	44.2	28148000	7274600
Cre02.g095400.t2.1;Cre02.g095400.t1.2	Cre02.g095400.t2.1;Cre02.g095400.t1.2	3;3	3;3	3;3	Cre02.g095400.t2.1 pacid=30785033 annot-version=v5.5;Cre02.g095400.t1.2 pacid=30785032 annot-version=v5.5	2	3	3	3	3	3	3	0	1	3	3	3	3	0	1	3	3	3	3	0	1	3	12.6	12.6	12.6	38.387	357	357;366	0	42.339	By MS/MS	By MS/MS	By MS/MS		By matching	By MS/MS	12.6	12.6	12.6	0	2	12.6	490850	182830
Cre02.g098450.t1.2	Cre02.g098450.t1.2	7	7	7	Cre02.g098450.t1.2 pacid=30785067 gene-symbol=EIF2G definition=eIF2 gamma subunit annot-version=v5.5	1	7	7	7	5	6	6	4	2	5	5	6	6	4	2	5	5	6	6	4	2	5	17.5	17.5	17.5	50.068	462	462	0	71.17	By MS/MS	By MS/MS	By MS/MS	By MS/MS	By MS/MS	By MS/MS	13.6	13.2	15.6	7.8	3.7	12.1	1088700	217680
Cre02.g101350.t1.2	Cre02.g101350.t1.2	4	4	4	Cre02.g101350.t1.2 pacid=30786442 gene-symbol=RPL10A definition=Cytosolic 80S ribosomal protein L10a annot-version=v5.5	1	4	4	4	3	2	3	3	3	4	3	2	3	3	3	4	3	2	3	3	3	4	13.1	13.1	13.1	23.944	214	214	0	24.767	By MS/MS	By MS/MS	By MS/MS	By MS/MS	By MS/MS	By MS/MS	12.1	8.9	13.1	9.3	9.3	13.1	637290	206480
Cre02.g102250.t1.2	Cre02.g102250.t1.2	2	2	2	Cre02.g102250.t1.2 pacid=30785015 gene-symbol=RPS3 definition=Cytosolic 80S ribosomal protein S3 annot-version=v5.5	1	2	2	2	1	2	1	2	0	0	1	2	1	2	0	0	1	2	1	2	0	0	10.2	10.2	10.2	20.978	187	187	0	11.423	By MS/MS	By MS/MS	By MS/MS	By matching			5.9	10.2	4.3	10.2	0	0	71987	16979
Cre02.g103550.t1.2	Cre02.g103550.t1.2	6	6	6	Cre02.g103550.t1.2 pacid=30785557 gene-symbol=EIF1A definition=Eukaryotic translation initiation factor 1A, eIF-1A annot-version=v5.5	1	6	6	6	6	4	4	6	4	5	6	4	4	6	4	5	6	4	4	6	4	5	44.7	44.7	44.7	16.455	141	141	0	41.866	By MS/MS	By MS/MS	By MS/MS	By MS/MS	By MS/MS	By MS/MS	44.7	29.1	31.2	44.7	31.2	39.7	4891100	1358200
Cre02.g104150.t1.1	Cre02.g104150.t1.1	3	3	3	Cre02.g104150.t1.1 pacid=30785013 annot-version=v5.5	1	3	3	3	2	2	0	0	1	0	2	2	0	0	1	0	2	2	0	0	1	0	1.7	1.7	1.7	253.03	2349	2349	0	21.094	By MS/MS	By MS/MS			By MS/MS		1.2	0.9	0	0	0.7	0	102730	61998
Cre02.g104650.t2.1;Cre02.g104650.t1.1	Cre02.g104650.t2.1;Cre02.g104650.t1.1	14;14	14;14	14;14	Cre02.g104650.t2.1 pacid=30785422 annot-version=v5.5;Cre02.g104650.t1.1 pacid=30785421 annot-version=v5.5	2	14	14	14	13	12	10	11	11	11	13	12	10	11	11	11	13	12	10	11	11	11	16.4	16.4	16.4	125.57	1184	1184;1185	0	126.12	By MS/MS	By MS/MS	By MS/MS	By MS/MS	By MS/MS	By MS/MS	14.2	14.2	12.7	15.6	14.4	14.4	2906200	921700
Cre02.g106600.t1.2	Cre02.g106600.t1.2	4	4	4	Cre02.g106600.t1.2 pacid=30784812 gene-symbol=RPS19 definition=Cytosolic 80S ribosomal protein S19 annot-version=v5.5	1	4	4	4	4	3	2	2	2	3	4	3	2	2	2	3	4	3	2	2	2	3	31.3	31.3	31.3	16.997	150	150	0	24.771	By MS/MS	By MS/MS	By MS/MS	By MS/MS	By matching	By MS/MS	31.3	21.3	11.3	16	16	21.3	598390	237630
Cre02.g114600.t1.2	Cre02.g114600.t1.2	6	6	6	Cre02.g114600.t1.2 pacid=30784840 gene-symbol=PRX2 definition=2-cys Peroxiredoxin annot-version=v5.5	1	6	6	6	5	5	5	5	6	4	5	5	5	5	6	4	5	5	5	5	6	4	39.9	39.9	39.9	21.642	198	198	0	41.006	By MS/MS	By MS/MS	By MS/MS	By MS/MS	By MS/MS	By MS/MS	39.9	39.9	34.8	39.9	39.9	34.8	1377800	338000
Cre02.g115200.t1.2	Cre02.g115200.t1.2	4	4	4	Cre02.g115200.t1.2 pacid=30785578 gene-symbol=RPL27A definition=Cytosolic 80S ribosomal protein L27a annot-version=v5.5	1	4	4	4	3	2	3	3	3	2	3	2	3	3	3	2	3	2	3	3	3	2	24.5	24.5	24.5	16.391	147	147	0	26.873	By MS/MS	By MS/MS	By MS/MS	By MS/MS	By matching	By MS/MS	19	10.2	15.6	24.5	19	10.2	943500	311250
Cre02.g115250.t1.1	Cre02.g115250.t1.1	6	6	6	Cre02.g115250.t1.1 pacid=30785377 gene-symbol=POC1 definition=Centriole proteome protein annot-version=v5.5	1	6	6	6	5	5	4	4	2	4	5	5	4	4	2	4	5	5	4	4	2	4	20.6	20.6	20.6	58.913	559	559	0	50.864	By MS/MS	By MS/MS	By MS/MS	By MS/MS	By MS/MS	By MS/MS	18.6	18.6	14.8	13.4	7.7	17	1428200	527660
Cre02.g116750.t2.1;Cre02.g116750.t1.1	Cre02.g116750.t2.1;Cre02.g116750.t1.1	6;6	6;6	6;6	Cre02.g116750.t2.1 pacid=30784899 gene-symbol=ATP1A definition=Mitochondrial F1F0 ATP synthase, alpha subunit annot-version=v5.5;Cre02.g116750.t1.1 pacid=30784898 gene-symbol=ATP1A definition=Mitochondrial F1F0 ATP synthase, alpha subunit ann	2	6	6	6	5	6	4	5	6	6	5	6	4	5	6	6	5	6	4	5	6	6	14.1	14.1	14.1	61.514	569	569;569	0	47.607	By MS/MS	By MS/MS	By MS/MS	By MS/MS	By MS/MS	By MS/MS	12.3	14.1	9.3	12.1	14.1	14.1	1376200	370200
Cre02.g118300.t1.2	Cre02.g118300.t1.2	20	20	20	Cre02.g118300.t1.2 pacid=30784864 gene-symbol=HEL12 definition=DEAD box ATP-dependent RNA helicase annot-version=v5.5	1	20	20	20	18	15	15	15	15	19	18	15	15	15	15	19	18	15	15	15	15	19	32.6	32.6	32.6	77.43	737	737	0	198.98	By MS/MS	By MS/MS	By MS/MS	By MS/MS	By MS/MS	By MS/MS	28.9	24.4	28.9	24.6	30.4	30.8	10073000	3521900
Cre02.g118750.t1.1	Cre02.g118750.t1.1	2	2	2	Cre02.g118750.t1.1 pacid=30785955 annot-version=v5.5	1	2	2	2	2	2	2	1	1	1	2	2	2	1	1	1	2	2	2	1	1	1	6.4	6.4	6.4	65.631	605	605	0	13.003	By MS/MS	By MS/MS	By matching	By MS/MS	By matching	By matching	6.4	6.4	6.4	2.8	2.8	2.8	281850	111250
Cre02.g141350.t1.2	Cre02.g141350.t1.2	5	5	5	Cre02.g141350.t1.2 pacid=30785840 gene-symbol=DRC10 definition=Nexin-dynein regulatory complex 10 annot-version=v5.5	1	5	5	5	4	4	4	1	0	2	4	4	4	1	0	2	4	4	4	1	0	2	22.5	22.5	22.5	40.925	356	356	0	43.799	By MS/MS	By MS/MS	By MS/MS	By matching		By MS/MS	18	15.4	15.4	2.5	0	8.4	631160	297360
Cre02.g143050.t1.2	Cre02.g143050.t1.2	4	4	4	Cre02.g143050.t1.2 pacid=30785883 gene-symbol=RPP2 definition=Acidic ribosomal protein P2 annot-version=v5.5	1	4	4	4	4	3	4	4	3	4	4	3	4	4	3	4	4	3	4	4	3	4	52.3	52.3	52.3	10.879	109	109	0	32.933	By MS/MS	By MS/MS	By MS/MS	By MS/MS	By MS/MS	By MS/MS	52.3	28.4	52.3	52.3	28.4	52.3	2301300	804510
Cre03.g144807.t1.1	Cre03.g144807.t1.1	3	3	3	Cre03.g144807.t1.1 pacid=30786652 gene-symbol=MAS1 definition=Malate synthase annot-version=v5.5	1	3	3	3	2	0	2	2	1	0	2	0	2	2	1	0	2	0	2	2	1	0	5.1	5.1	5.1	60.707	546	546	0	18.457	By MS/MS		By MS/MS	By matching	By matching		5.1	0	4.8	4.8	1.5	0	179700	107770
Cre03.g144967.t1.1	Cre03.g144967.t1.1	10	10	10	Cre03.g144967.t1.1 pacid=30787447 annot-version=v5.5	1	10	10	10	10	9	9	6	4	9	10	9	9	6	4	9	10	9	9	6	4	9	17.6	17.6	17.6	68.773	621	621	0	77.515	By MS/MS	By MS/MS	By MS/MS	By MS/MS	By MS/MS	By MS/MS	17.6	17.4	14.3	15.8	7.9	17.6	2127800	786650
Cre03.g149100.t1.2	Cre03.g149100.t1.2	19	19	19	Cre03.g149100.t1.2 pacid=30787831 gene-symbol=CIS2 definition=Citrate synthase, glyoxysomal/microbody form annot-version=v5.5	1	19	19	19	18	16	17	11	9	13	18	16	17	11	9	13	18	16	17	11	9	13	40	40	40	54.531	495	495	0	291.61	By MS/MS	By MS/MS	By MS/MS	By MS/MS	By MS/MS	By MS/MS	40	38	38	25.5	24	31.5	14155000	6370600
Cre03.g152150.t1.2	Cre03.g152150.t1.2	12	12	12	Cre03.g152150.t1.2 pacid=30786690 annot-version=v5.5	1	12	12	12	9	12	10	9	10	8	9	12	10	9	10	8	9	12	10	9	10	8	48.4	48.4	48.4	41.014	413	413	0	111.39	By MS/MS	By MS/MS	By MS/MS	By MS/MS	By MS/MS	By MS/MS	38.7	48.4	44.3	41.9	41.6	36.3	5379600	1030600
Cre03.g156150.t1.1	Cre03.g156150.t1.1	5	5	5	Cre03.g156150.t1.1 pacid=30787649 gene-symbol=HEL13 definition=DEAD/DEAH box helicase annot-version=v5.5	1	5	5	5	4	3	5	3	1	4	4	3	5	3	1	4	4	3	5	3	1	4	7.6	7.6	7.6	98.54	910	910	0	31.457	By MS/MS	By MS/MS	By MS/MS	By MS/MS	By MS/MS	By MS/MS	6.3	4	7.6	4	1.5	6.4	443540	137920
Cre03.g158900.t1.2	Cre03.g158900.t1.2	9	9	9	Cre03.g158900.t1.2 pacid=30787386 gene-symbol=DLA2 definition=dihydrolipoamide acetyltransferase, possibly plastidic annot-version=v5.5	1	9	9	9	8	7	6	6	7	8	8	7	6	6	7	8	8	7	6	6	7	8	19.4	19.4	19.4	49.796	494	494	0	70.184	By MS/MS	By MS/MS	By MS/MS	By MS/MS	By MS/MS	By MS/MS	18.6	16.4	14.6	14	14.2	18.6	1799600	527900
Cre03.g163700.t1.2	Cre03.g163700.t1.2	5	5	5	Cre03.g163700.t1.2 pacid=30787609 annot-version=v5.5	1	5	5	5	5	4	3	3	3	4	5	4	3	3	3	4	5	4	3	3	3	4	9	9	9	86.173	880	880	0	40.131	By MS/MS	By MS/MS	By MS/MS	By MS/MS	By MS/MS	By MS/MS	9	9	5.1	5.1	5.6	8	716070	276680
Cre03.g164950.t1.1	Cre03.g164950.t1.1	3	3	3	Cre03.g164950.t1.1 pacid=30788229 gene-symbol=SRS3 definition=Serine/arginine-rich pre-mRNA splicing factor annot-version=v5.5	1	3	3	3	3	3	3	3	3	2	3	3	3	3	3	2	3	3	3	3	3	2	8.4	8.4	8.4	37.422	358	358	0	22.587	By MS/MS	By MS/MS	By MS/MS	By MS/MS	By MS/MS	By MS/MS	8.4	8.4	8.4	8.4	8.4	4.5	1659700	459990
Cre03.g167550.t1.1	Cre03.g167550.t1.1	2	2	2	Cre03.g167550.t1.1 pacid=30787400 gene-symbol=CEP290 definition=Centriole proteome protein annot-version=v5.5	1	2	2	2	1	2	1	1	0	0	1	2	1	1	0	0	1	2	1	1	0	0	1	1	1	279.37	2518	2518	0	11.489	By MS/MS	By MS/MS	By MS/MS	By MS/MS			0.5	1	0.5	0.6	0	0	95191	25753
Cre03.g171950.t1.1	Cre03.g171950.t1.1	2	2	2	Cre03.g171950.t1.1 pacid=30788022 gene-symbol=PEPC2 definition=Phosphoenolpyruvate carboxylase annot-version=v5.5	1	2	2	2	1	2	1	0	1	0	1	2	1	0	1	0	1	2	1	0	1	0	1.9	1.9	1.9	131.19	1221	1221	0	12.578	By matching	By MS/MS	By MS/MS		By MS/MS		0.8	1.9	0.8	0	0.8	0	125740	30096
Cre03.g172950.t1.2	Cre03.g172950.t1.2	9	9	9	Cre03.g172950.t1.2 pacid=30787716 gene-symbol=PUS21 definition=TruB family RNA pseudouridine synthase annot-version=v5.5	1	9	9	9	9	9	7	6	5	6	9	9	7	6	5	6	9	9	7	6	5	6	16.8	16.8	16.8	58.331	525	525	0	77.308	By MS/MS	By MS/MS	By MS/MS	By MS/MS	By MS/MS	By MS/MS	16.8	16.8	13	11.4	11.4	13.3	4074700	1015600
Cre03.g176651.t1.1	Cre03.g176651.t1.1	3	3	3	Cre03.g176651.t1.1 pacid=30788101 gene-symbol=MYSM1 definition=Histone H2A deubiquitinase annot-version=v5.5	1	3	3	3	3	2	2	2	2	2	3	2	2	2	2	2	3	2	2	2	2	2	3.8	3.8	3.8	111.55	1126	1126	0	26.773	By MS/MS	By MS/MS	By MS/MS	By MS/MS	By MS/MS	By MS/MS	3.8	2.8	2.8	2.8	2.8	2.8	568190	166640
Cre03.g177950.t1.1	Cre03.g177950.t1.1	6	6	6	Cre03.g177950.t1.1 pacid=30787471 annot-version=v5.5	1	6	6	6	6	4	3	3	3	2	6	4	3	3	3	2	6	4	3	3	3	2	4	4	4	276.07	2701	2701	0	37.363	By MS/MS	By MS/MS	By matching	By MS/MS	By MS/MS	By MS/MS	4	2.5	1.7	2.3	2	1.2	713480	372030
Cre03.g178600.t1.1	Cre03.g178600.t1.1	2	2	2	Cre03.g178600.t1.1 pacid=30787789 gene-symbol=TOP1 definition=DNA topoisomerase I annot-version=v5.5	1	2	2	2	1	2	0	2	1	0	1	2	0	2	1	0	1	2	0	2	1	0	3.4	3.4	3.4	77.011	676	676	0	12.57	By MS/MS	By matching		By MS/MS	By MS/MS		1.9	3.4	0	3.4	1.9	0	356250	194410
Cre03.g179300.t2.1;Cre03.g179300.t1.1	Cre03.g179300.t2.1;Cre03.g179300.t1.1	2;2	2;2	2;2	Cre03.g179300.t2.1 pacid=30786669 definition=SNF2-related DNA/RNA helicase annot-version=v5.5;Cre03.g179300.t1.1 pacid=30786668 definition=SNF2-related DNA/RNA helicase annot-version=v5.5	2	2	2	2	2	2	1	1	0	1	2	2	1	1	0	1	2	2	1	1	0	1	2	2	2	245.61	2267	2267;2268	0	11.53	By MS/MS	By MS/MS	By MS/MS	By matching		By matching	2	2	0.8	0.8	0	0.8	135170	48520
Cre03.g180750.t1.2	Cre03.g180750.t1.2	9	9	9	Cre03.g180750.t1.2 pacid=30787285 gene-symbol=METE definition=Cobalamin-dependent methionine synthase annot-version=v5.5	1	9	9	9	6	9	7	6	6	4	6	9	7	6	6	4	6	9	7	6	6	4	15.7	15.7	15.7	86.772	815	815	0	83.421	By MS/MS	By MS/MS	By MS/MS	By MS/MS	By MS/MS	By MS/MS	12.5	15.7	14.5	11.4	9.9	7.1	1733400	407400
Cre03.g182500.t1.2	Cre03.g182500.t1.2	2	2	2	Cre03.g182500.t1.2 pacid=30787417 gene-symbol=SRP72 definition=Subunit of the Signal Recognition Particle annot-version=v5.5	1	2	2	2	1	1	2	2	2	1	1	1	2	2	2	1	1	1	2	2	2	1	4.4	4.4	4.4	76.878	746	746	0	11.567	By MS/MS	By matching	By MS/MS	By MS/MS	By MS/MS	By matching	2.8	1.6	4.4	4.4	4.4	2.8	254390	29914
Cre04.g216850.t1.2;Cre03.g190950.t1.2	Cre04.g216850.t1.2;Cre03.g190950.t1.2	19;19	19;19	19;19	Cre04.g216850.t1.2 pacid=30791599 gene-symbol=TUA2 definition=Alpha tubulin 2 annot-version=v5.5;Cre03.g190950.t1.2 pacid=30788226 gene-symbol=TUA1 definition=Alpha tubulin 1 annot-version=v5.5	2	19	19	19	18	16	13	9	10	10	18	16	13	9	10	10	18	16	13	9	10	10	46.1	46.1	46.1	49.586	451	451;451	0	316.6	By MS/MS	By MS/MS	By MS/MS	By MS/MS	By MS/MS	By MS/MS	43	43.5	36.6	26.2	31.7	26.6	11738000	6406900
Cre03.g191050.t1.2	Cre03.g191050.t1.2	2	2	2	Cre03.g191050.t1.2 pacid=30788027 gene-symbol=RAN1 definition=Ran-like small GTPase annot-version=v5.5	1	2	2	2	1	2	1	1	2	1	1	2	1	1	2	1	1	2	1	1	2	1	11.2	11.2	11.2	25.436	223	223	0	13.23	By MS/MS	By matching	By MS/MS	By MS/MS	By MS/MS	By MS/MS	4.9	11.2	4.9	4.9	11.2	6.3	281790	48442
Cre03.g192850.t1.2	Cre03.g192850.t1.2	8	8	8	Cre03.g192850.t1.2 pacid=30786830 annot-version=v5.5	1	8	8	8	6	8	6	7	7	6	6	8	6	7	7	6	6	8	6	7	7	6	10.3	10.3	10.3	118.2	1093	1093	0	94.56	By MS/MS	By MS/MS	By MS/MS	By MS/MS	By MS/MS	By MS/MS	9.5	10.3	8.3	9.1	10.3	8.3	2157300	637000
Cre03.g195450.t1.1	Cre03.g195450.t1.1	2	2	2	Cre03.g195450.t1.1 pacid=30787021 gene-symbol=POC11 definition=Centriole proteome protein annot-version=v5.5	1	2	2	2	1	1	2	0	0	0	1	1	2	0	0	0	1	1	2	0	0	0	6.4	6.4	6.4	53.22	481	481	0	11.773	By MS/MS	By MS/MS	By MS/MS				4.2	2.3	6.4	0	0	0	102950	34310
Cre03.g196850.t1.2	Cre03.g196850.t1.2	2	2	2	Cre03.g196850.t1.2 pacid=30787480 annot-version=v5.5	1	2	2	2	1	1	1	0	1	1	1	1	1	0	1	1	1	1	1	0	1	1	5.3	5.3	5.3	57.015	524	524	0	15.217	By matching	By MS/MS	By MS/MS		By MS/MS	By MS/MS	2.7	2.7	2.7	0	2.7	2.7	147230	63709
Cre03.g197000.t1.2	Cre03.g197000.t1.2	3	3	3	Cre03.g197000.t1.2 pacid=30787867 annot-version=v5.5	1	3	3	3	0	2	1	2	2	1	0	2	1	2	2	1	0	2	1	2	2	1	10	10	10	36.888	330	330	0	25.008		By MS/MS	By MS/MS	By MS/MS	By MS/MS	By MS/MS	0	8.5	4.5	8.5	10	3.9	207360	0
Cre03.g197050.t1.2	Cre03.g197050.t1.2	3	3	3	Cre03.g197050.t1.2 pacid=30786769 gene-symbol=HTV2 definition=Histone H3 variant annot-version=v5.5	1	3	3	3	1	2	2	1	2	3	1	2	2	1	2	3	1	2	2	1	2	3	18.3	18.3	18.3	22.336	202	202	0	19.639	By MS/MS	By MS/MS	By MS/MS	By MS/MS	By MS/MS	By MS/MS	7.4	10.9	10.9	3.5	10.9	18.3	261930	39306
Cre03.g197350.t1.2	Cre03.g197350.t1.2	17	17	17	Cre03.g197350.t1.2 pacid=30786598 annot-version=v5.5	1	17	17	17	15	15	14	12	9	7	15	15	14	12	9	7	15	15	14	12	9	7	20	20	20	91.688	833	833	0	113.65	By MS/MS	By MS/MS	By MS/MS	By MS/MS	By MS/MS	By MS/MS	16.7	18.1	17.9	15.2	11.3	9.2	3194500	1028600
Cre03.g199647.t1.1	Cre03.g199647.t1.1	10	10	10	Cre03.g199647.t1.1 pacid=30786562 definition=Eukaryotic translation initiation factor 4A3 annot-version=v5.5	1	10	10	10	9	9	10	6	7	6	9	9	10	6	7	6	9	9	10	6	7	6	25.6	25.6	25.6	45.594	399	399	0	82.647	By MS/MS	By MS/MS	By MS/MS	By MS/MS	By MS/MS	By MS/MS	22.8	23.8	25.6	17.8	21.1	19	3169900	1231200
Cre03.g201900.t1.1	Cre03.g201900.t1.1	5	5	5	Cre03.g201900.t1.1 pacid=30788214 gene-symbol=RSP1 definition=Radial spoke protein 1 annot-version=v5.5	1	5	5	5	5	3	1	2	0	0	5	3	1	2	0	0	5	3	1	2	0	0	10.8	10.8	10.8	87.785	814	814	0	35.341	By MS/MS	By MS/MS	By MS/MS	By matching			10.8	5.4	1.8	3.7	0	0	402730	270820
Cre03.g203450.t1.2	Cre03.g203450.t1.2	3	3	3	Cre03.g203450.t1.2 pacid=30787782 gene-symbol=RPS21 definition=Cytosolic 80S ribosomal protein S21 annot-version=v5.5	1	3	3	3	3	3	3	3	3	3	3	3	3	3	3	3	3	3	3	3	3	3	36.6	36.6	36.6	9.1042	82	82	0	44.318	By MS/MS	By MS/MS	By MS/MS	By MS/MS	By MS/MS	By MS/MS	36.6	36.6	36.6	36.6	36.6	36.6	3938900	967330
Cre03.g210625.t1.1	Cre03.g210625.t1.1	2	2	2	Cre03.g210625.t1.1 pacid=30787475 annot-version=v5.5	1	2	2	2	2	2	1	1	1	1	2	2	1	1	1	1	2	2	1	1	1	1	1.7	1.7	1.7	185.34	1784	1784	0.0021552	11.141	By MS/MS	By MS/MS	By MS/MS	By MS/MS	By MS/MS	By matching	1.7	1.7	0.7	0.7	0.7	1	185150	69469
Cre04.g211800.t1.2	Cre04.g211800.t1.2	3	3	3	Cre04.g211800.t1.2 pacid=30791018 gene-symbol=RPL23 definition=Cytosolic 80S ribosomal protein L23 annot-version=v5.5	1	3	3	3	3	3	1	2	0	2	3	3	1	2	0	2	3	3	1	2	0	2	33.6	33.6	33.6	14.933	140	140	0	28.419	By MS/MS	By MS/MS	By MS/MS	By MS/MS		By MS/MS	33.6	33.6	14.3	27.9	0	27.9	876540	357360
Cre04.g213905.t2.1;Cre04.g213905.t1.1	Cre04.g213905.t2.1;Cre04.g213905.t1.1	4;4	4;4	4;4	Cre04.g213905.t2.1 pacid=30791354 annot-version=v5.5;Cre04.g213905.t1.1 pacid=30791353 annot-version=v5.5	2	4	4	4	4	4	3	2	1	0	4	4	3	2	1	0	4	4	3	2	1	0	5.8	5.8	5.8	66.912	621	621;634	0	28.9	By MS/MS	By MS/MS	By MS/MS	By MS/MS	By matching		5.8	5.8	5.8	4.8	3.1	0	421960	196050
Cre04.g214503.t2.1;Cre04.g214503.t1.1	Cre04.g214503.t2.1;Cre04.g214503.t1.1	3;3	3;3	3;3	Cre04.g214503.t2.1 pacid=30791057 annot-version=v5.5;Cre04.g214503.t1.1 pacid=30791056 annot-version=v5.5	2	3	3	3	3	2	2	3	3	2	3	2	2	3	3	2	3	2	2	3	3	2	41.4	41.4	41.4	15.07	140	140;140	0	26.452	By MS/MS	By MS/MS	By MS/MS	By MS/MS	By MS/MS	By MS/MS	41.4	21.4	21.4	41.4	41.4	21.4	652030	191360
Cre04.g215350.t1.1	Cre04.g215350.t1.1	3	3	3	Cre04.g215350.t1.1 pacid=30791077 annot-version=v5.5	1	3	3	3	3	3	3	2	3	3	3	3	3	2	3	3	3	3	3	2	3	3	4.4	4.4	4.4	92.144	909	909	0	20.102	By MS/MS	By MS/MS	By MS/MS	By MS/MS	By MS/MS	By MS/MS	4.4	4.4	4.4	2.5	4.4	4.4	776970	230690
Cre04.g215800.t1.1	Cre04.g215800.t1.1	3	3	3	Cre04.g215800.t1.1 pacid=30790989 annot-version=v5.5	1	3	3	3	2	2	3	2	0	3	2	2	3	2	0	3	2	2	3	2	0	3	1.6	1.6	1.6	254.14	2365	2365	0	18.127	By matching	By MS/MS	By MS/MS	By MS/MS		By MS/MS	1.2	1.2	1.6	1	0	1.6	200980	41168
Cre04.g218850.t1.2	Cre04.g218850.t1.2	2	2	2	Cre04.g218850.t1.2 pacid=30791468 definition=Putative small nucleolar ribonucleoprotein U3 protein annot-version=v5.5	1	2	2	2	2	2	1	1	1	2	2	2	1	1	1	2	2	2	1	1	1	2	7.1	7.1	7.1	41.68	365	365	0	12.499	By MS/MS	By MS/MS	By MS/MS	By MS/MS	By MS/MS	By MS/MS	7.1	7.1	3.6	3.6	3.6	7.1	274520	84220
Cre04.g221650.t1.1	Cre04.g221650.t1.1	3	3	3	Cre04.g221650.t1.1 pacid=30791225 gene-symbol=TOP4 definition=Topoisomerase type IV annot-version=v5.5	1	3	3	3	2	3	3	3	2	3	2	3	3	3	2	3	2	3	3	3	2	3	2.5	2.5	2.5	134.79	1350	1350	0	17.307	By MS/MS	By MS/MS	By MS/MS	By MS/MS	By MS/MS	By MS/MS	1.9	2.5	2.5	2.5	1.9	2.5	375410	75311
Cre04.g223100.t1.2	Cre04.g223100.t1.2	2	2	2	Cre04.g223100.t1.2 pacid=30791364 gene-symbol=CAH1 definition=Carbonic anhydrase annot-version=v5.5	1	2	2	2	2	0	0	1	2	0	2	0	0	1	2	0	2	0	0	1	2	0	9.5	9.5	9.5	41.627	377	377	0	11.428	By MS/MS			By MS/MS	By MS/MS		9.5	0	0	4.5	9.5	0	116130	53911
Cre04.g223300.t1.2;Cre04.g222750.t1.1	Cre04.g223300.t1.2;Cre04.g222750.t1.1	2;1	2;1	2;1	Cre04.g223300.t1.2 pacid=30791132 gene-symbol=CCP1 definition=Low-CO2-inducible chloroplast envelope protein annot-version=v5.5;Cre04.g222750.t1.1 pacid=30791330 gene-symbol=CCP2 definition=Low-CO2-inducible membrane protein annot-version=v5	2	2	2	2	1	1	0	2	1	1	1	1	0	2	1	1	1	1	0	2	1	1	7.3	7.3	7.3	38.331	358	358;355	0	14.963	By MS/MS	By MS/MS		By MS/MS	By MS/MS	By MS/MS	3.9	3.9	0	7.3	3.9	3.9	177790	33014
Cre04.g226450.t1.1	Cre04.g226450.t1.1	4	4	4	Cre04.g226450.t1.1 pacid=30791065 gene-symbol=PRP17 definition=Nuclear pre-mRNA splicing factor, component of the spliceosome annot-version=v5.5	1	4	4	4	4	3	3	2	4	2	4	3	3	2	4	2	4	3	3	2	4	2	8	8	8	63.906	576	576	0	31.906	By MS/MS	By MS/MS	By MS/MS	By MS/MS	By MS/MS	By MS/MS	8	8	6.9	6.9	8	6.9	1255300	548150
Cre04.g229300.t1.1	Cre04.g229300.t1.1	4	4	4	Cre04.g229300.t1.1 pacid=30791545 gene-symbol=RCA1 definition=rubisco activase annot-version=v5.5	1	4	4	4	4	2	1	3	2	1	4	2	1	3	2	1	4	2	1	3	2	1	15.7	15.7	15.7	45.029	408	408	0	28.899	By MS/MS	By MS/MS	By MS/MS	By MS/MS	By MS/MS	By MS/MS	15.7	6.9	3.7	10.5	7.8	4.2	329670	175320
Cre04.g232104.t1.1	Cre04.g232104.t1.1	2	2	2	Cre04.g232104.t1.1 pacid=30791553 gene-symbol=LHCBM3 definition=Light-harvesting complex II chlorophyll a/b binding protein M3 annot-version=v5.5	1	2	2	2	1	1	1	2	1	1	1	1	1	2	1	1	1	1	1	2	1	1	6.6	6.6	6.6	27.38	257	257	0	16.566	By MS/MS	By MS/MS	By MS/MS	By MS/MS	By MS/MS	By MS/MS	5.8	5.8	5.8	6.6	5.8	5.8	1132700	315910
Cre05.g232950.t1.2	Cre05.g232950.t1.2	3	3	3	Cre05.g232950.t1.2 pacid=30783123 annot-version=v5.5	1	3	3	3	2	1	1	1	3	2	2	1	1	1	3	2	2	1	1	1	3	2	8.7	8.7	8.7	57.496	504	504	0	21.757	By MS/MS	By MS/MS	By MS/MS	By MS/MS	By MS/MS	By MS/MS	7.5	3	3	3	8.7	7.5	692440	304620
Cre05.g234550.t2.1;Cre05.g234550.t1.2	Cre05.g234550.t2.1;Cre05.g234550.t1.2	3;3	3;3	3;3	Cre05.g234550.t2.1 pacid=30783069 gene-symbol=FBA3 definition=Fructose-1,6-bisphosphate aldolase annot-version=v5.5;Cre05.g234550.t1.2 pacid=30783068 gene-symbol=FBA3 definition=Fructose-1,6-bisphosphate aldolase annot-version=v5.5	2	3	3	3	2	2	3	3	2	2	2	2	3	3	2	2	2	2	3	3	2	2	13.3	13.3	13.3	40.985	377	377;377	0	35.978	By MS/MS	By MS/MS	By MS/MS	By MS/MS	By MS/MS	By MS/MS	5.8	11.1	13.3	13.3	5.8	5.8	561340	59323
Cre05.g234637.t1.1	Cre05.g234637.t1.1	2	2	2	Cre05.g234637.t1.1 pacid=30782975 annot-version=v5.5	1	2	2	2	2	2	2	2	1	1	2	2	2	2	1	1	2	2	2	2	1	1	15.4	15.4	15.4	14.838	130	130	0.0021277	10.936	By MS/MS	By MS/MS	By MS/MS	By MS/MS	By MS/MS	By MS/MS	15.4	15.4	15.4	15.4	7.7	7.7	345710	113690
Cre05.g234638.t1.1	Cre05.g234638.t1.1	3	3	3	Cre05.g234638.t1.1 pacid=30783016 annot-version=v5.5	1	3	3	3	3	3	0	2	1	0	3	3	0	2	1	0	3	3	0	2	1	0	6	6	6	65.759	598	598	0	23.063	By MS/MS	By MS/MS		By MS/MS	By MS/MS		6	6	0	3.2	1.8	0	567560	233610
Cre05.g234648.t1.1	Cre05.g234648.t1.1	4	4	4	Cre05.g234648.t1.1 pacid=30783353 annot-version=v5.5	1	4	4	4	4	3	3	3	4	2	4	3	3	3	4	2	4	3	3	3	4	2	25.5	25.5	25.5	12.415	110	110	0	26.781	By MS/MS	By MS/MS	By MS/MS	By MS/MS	By MS/MS	By MS/MS	25.5	25.5	25.5	25.5	25.5	25.5	882370	207680
Cre05.g234652.t1.1	Cre05.g234652.t1.1	2	2	2	Cre05.g234652.t1.1 pacid=30782957 annot-version=v5.5	1	2	2	2	1	2	2	1	1	0	1	2	2	1	1	0	1	2	2	1	1	0	7.9	7.9	7.9	48.216	432	432	0	14.012	By MS/MS	By MS/MS	By MS/MS	By MS/MS	By matching		5.3	7.9	7.9	2.5	2.5	0	157430	41421
Cre05.g236050.t1.1	Cre05.g236050.t1.1	22	22	22	Cre05.g236050.t1.1 pacid=30783330 annot-version=v5.5	1	22	22	22	16	15	17	12	15	11	16	15	17	12	15	11	16	15	17	12	15	11	7.7	7.7	7.7	496.48	4754	4754	0	170.57	By MS/MS	By MS/MS	By MS/MS	By MS/MS	By MS/MS	By MS/MS	5.3	5	6.1	4.1	5.2	3.6	2852000	944200
Cre05.g237450.t1.2	Cre05.g237450.t1.2	3	3	3	Cre05.g237450.t1.2 pacid=30783054 gene-symbol=PSRP1 definition=Plastid-specific ribosomal protein 1 annot-version=v5.5	1	3	3	3	2	2	3	3	3	2	2	2	3	3	3	2	2	2	3	3	3	2	10.2	10.2	10.2	31.708	285	285	0	18.839	By MS/MS	By MS/MS	By MS/MS	By MS/MS	By MS/MS	By MS/MS	7.4	7.4	10.2	10.2	10.2	7.4	320540	47812
Cre05.g237700.t1.2	Cre05.g237700.t1.2	4	4	4	Cre05.g237700.t1.2 pacid=30783042 gene-symbol=NOP10 definition=Nucleolar protein, Structural Component of H/ACA snoRNPs annot-version=v5.5	1	4	4	4	4	3	2	3	3	2	4	3	2	3	3	2	4	3	2	3	3	2	67.2	67.2	67.2	7.3864	64	64	0	33.947	By MS/MS	By MS/MS	By MS/MS	By MS/MS	By MS/MS	By MS/MS	67.2	46.9	34.4	46.9	46.9	43.8	4098200	1946600
Cre05.g242550.t1.2	Cre05.g242550.t1.2	2	2	2	Cre05.g242550.t1.2 pacid=30783274 gene-symbol=RSP6 definition=Radial spoke protein 6 annot-version=v5.5	1	2	2	2	2	1	0	1	1	0	2	1	0	1	1	0	2	1	0	1	1	0	8.5	8.5	8.5	48.845	459	459	0	14.936	By MS/MS	By MS/MS		By matching	By matching		8.5	3.3	0	3.3	3.3	0	186130	116270
Cre05.g242858.t1.1	Cre05.g242858.t1.1	8	8	8	Cre05.g242858.t1.1 pacid=30783304 annot-version=v5.5	1	8	8	8	5	7	4	8	8	7	5	7	4	8	8	7	5	7	4	8	8	7	6.1	6.1	6.1	247.69	2475	2475	0	79.014	By MS/MS	By MS/MS	By MS/MS	By MS/MS	By MS/MS	By MS/MS	3.7	5.3	2.9	6.1	6.1	5.3	1612600	269230
Cre05.g245950.t1.1	Cre05.g245950.t1.1	9	9	9	Cre05.g245950.t1.1 pacid=30783046 gene-symbol=DRP1 definition=Dynamin-related GTPase annot-version=v5.5	1	9	9	9	5	5	5	8	6	7	5	5	5	8	6	7	5	5	5	8	6	7	21.3	21.3	21.3	69.55	628	628	0	88.243	By MS/MS	By MS/MS	By MS/MS	By MS/MS	By MS/MS	By MS/MS	14.5	14.3	11.3	19.9	15.1	16.7	1406900	299570
Cre05.g248450.t1.2;Cre05.g248400.t1.2	Cre05.g248450.t1.2;Cre05.g248400.t1.2	9;9	9;9	9;9	Cre05.g248450.t1.2 pacid=30783436 gene-symbol=CAH5 definition=Mitochondrial carbonic anhydrase annot-version=v5.5;Cre05.g248400.t1.2 pacid=30783080 gene-symbol=CAH4 definition=Mitochondrial carbonic anhydrase, beta type annot-version=v5.5	2	9	9	9	8	6	5	6	5	5	8	6	5	6	5	5	8	6	5	6	5	5	33.7	33.7	33.7	27.672	267	267;267	0	65.564	By MS/MS	By MS/MS	By MS/MS	By MS/MS	By MS/MS	By MS/MS	33.7	17.6	17.6	33	17.6	19.9	3086600	1053100
Cre06.g250100.t1.2	Cre06.g250100.t1.2	8	8	6	Cre06.g250100.t1.2 pacid=30778980 gene-symbol=HSP70B definition=Heat shock protein 70B annot-version=v5.5	1	8	8	6	7	8	7	6	4	6	7	8	7	6	4	6	5	6	5	5	3	5	15.2	15.2	11.9	71.954	679	679	0	66.23	By MS/MS	By MS/MS	By MS/MS	By MS/MS	By MS/MS	By MS/MS	12.7	15.2	13.4	11.9	7.4	11.5	1765200	632920
Cre06.g250200.t1.2	Cre06.g250200.t1.2	7	7	7	Cre06.g250200.t1.2 pacid=30779081 gene-symbol=METM definition=S-adenosylmethionine synthetase annot-version=v5.5	1	7	7	7	5	6	4	3	2	3	5	6	4	3	2	3	5	6	4	3	2	3	27.7	27.7	27.7	42.583	390	390	0	45.058	By MS/MS	By MS/MS	By MS/MS	By MS/MS	By matching	By MS/MS	22.8	25.1	16.2	11.5	9	12.8	1055600	284140
Cre06.g250950.t1.2	Cre06.g250950.t1.2	5	5	5	Cre06.g250950.t1.2 pacid=30779640 definition=U2 snRNP auxiliary factor, small subunit annot-version=v5.5	1	5	5	5	5	5	3	5	5	5	5	5	3	5	5	5	5	5	3	5	5	5	18.7	18.7	18.7	31.463	273	273	0	57.283	By MS/MS	By MS/MS	By MS/MS	By MS/MS	By MS/MS	By MS/MS	18.7	18.7	10.3	18.7	18.7	18.7	1910400	789580
Cre06.g251600.t1.2	Cre06.g251600.t1.2	5	5	5	Cre06.g251600.t1.2 pacid=30780109 gene-symbol=EIF5B2 definition=Eukaryotic translation initiation factor 5 annot-version=v5.5	1	5	5	5	2	5	4	4	4	5	2	5	4	4	4	5	2	5	4	4	4	5	11.6	11.6	11.6	51.799	467	467	0	36.013	By MS/MS	By MS/MS	By MS/MS	By MS/MS	By MS/MS	By MS/MS	3.6	11.6	8.4	8.4	9.2	11.6	1200400	179920
Cre06.g252600.t1.1	Cre06.g252600.t1.1	2	2	2	Cre06.g252600.t1.1 pacid=30779502 annot-version=v5.5	1	2	2	2	1	2	0	0	0	0	1	2	0	0	0	0	1	2	0	0	0	0	3.3	3.3	3.3	98.66	960	960	0.0021692	11.2	By MS/MS	By MS/MS					2.4	3.3	0	0	0	0	52684	32498
Cre06.g254150.t1.2	Cre06.g254150.t1.2	5	5	5	Cre06.g254150.t1.2 pacid=30779221 gene-symbol=UTP1 definition=Nucleolar protein, component of the U3 processome annot-version=v5.5	1	5	5	5	5	5	4	3	1	4	5	5	4	3	1	4	5	5	4	3	1	4	8.4	8.4	8.4	104.82	996	996	0	46.785	By MS/MS	By MS/MS	By MS/MS	By MS/MS	By MS/MS	By MS/MS	8.4	8.4	6.1	5.1	2.1	6.1	893730	334250
Cre06.g255400.t1.2	Cre06.g255400.t1.2	8	8	8	Cre06.g255400.t1.2 pacid=30778927 annot-version=v5.5	1	8	8	8	7	6	7	6	6	4	7	6	7	6	6	4	7	6	7	6	6	4	24.3	24.3	24.3	39.384	362	362	0	58.258	By MS/MS	By MS/MS	By MS/MS	By MS/MS	By MS/MS	By MS/MS	20.7	19.3	22.7	18.5	19.3	14.9	2309100	677210
Cre06.g255950.t1.1	Cre06.g255950.t1.1	5	5	5	Cre06.g255950.t1.1 pacid=30778441 annot-version=v5.5	1	5	5	5	5	4	4	4	3	1	5	4	4	4	3	1	5	4	4	4	3	1	9.9	9.9	9.9	68.579	647	647	0	35.163	By MS/MS	By MS/MS	By MS/MS	By MS/MS	By MS/MS	By MS/MS	9.9	9.4	7.3	9.9	5.9	2	805000	309140
Cre06.g257300.t1.1	Cre06.g257300.t1.1	2	2	2	Cre06.g257300.t1.1 pacid=30779736 annot-version=v5.5	1	2	2	2	2	2	2	1	1	1	2	2	2	1	1	1	2	2	2	1	1	1	3.5	3.5	3.5	87.377	862	862	0	13.174	By MS/MS	By MS/MS	By MS/MS	By MS/MS	By matching	By matching	3.5	3.5	3.5	1.5	2	1.5	264340	118910
Cre06.g257500.t1.2	Cre06.g257500.t1.2	2	2	2	Cre06.g257500.t1.2 pacid=30778449 gene-symbol=FTT2 definition=14-3-3 protein annot-version=v5.5	1	2	2	2	0	1	2	1	1	1	0	1	2	1	1	1	0	1	2	1	1	1	11.7	11.7	11.7	28.002	247	247	0	16.224		By MS/MS	By matching	By MS/MS	By MS/MS	By MS/MS	0	6.1	11.7	5.7	5.7	5.7	274920	0
Cre06.g257601.t1.2	Cre06.g257601.t1.2	2	2	2	Cre06.g257601.t1.2 pacid=30779174 gene-symbol=PRX1 definition=2-cys Peroxiredoxin annot-version=v5.5	1	2	2	2	1	2	2	0	0	0	1	2	2	0	0	0	1	2	2	0	0	0	16.6	16.6	16.6	25.961	235	235	0	13.947	By matching	By MS/MS	By MS/MS				9.8	16.6	16.6	0	0	0	272240	44487
Cre06.g257700.t1.1	Cre06.g257700.t1.1	3	3	3	Cre06.g257700.t1.1 pacid=30778782 annot-version=v5.5	1	3	3	3	3	2	3	3	1	1	3	2	3	3	1	1	3	2	3	3	1	1	1.8	1.8	1.8	332.91	3067	3067	0	19.239	By MS/MS	By MS/MS	By MS/MS	By MS/MS	By matching	By MS/MS	1.8	1.3	1.8	1.8	0.5	0.8	278150	110550
Cre06.g258733.t2.1;Cre06.g258733.t1.1	Cre06.g258733.t2.1;Cre06.g258733.t1.1	2;2	2;2	2;2	Cre06.g258733.t2.1 pacid=30779056 gene-symbol=LEU2 definition=Isopropylmalate synthase annot-version=v5.5;Cre06.g258733.t1.1 pacid=30779057 gene-symbol=LEU2 definition=Isopropylmalate synthase annot-version=v5.5	2	2	2	2	1	1	2	2	0	0	1	1	2	2	0	0	1	1	2	2	0	0	3.9	3.9	3.9	73.874	686	686;686	0	16.942	By matching	By MS/MS	By matching	By MS/MS			2.5	2.5	3.9	3.9	0	0	107000	18382
Cre06.g258800.t1.1	Cre06.g258800.t1.1	12	12	12	Cre06.g258800.t1.1 pacid=30780108 gene-symbol=GP2 definition=Hydroxyproline-rich glycoprotein component of the outer cell wall annot-version=v5.5	1	12	12	12	9	9	9	8	9	10	9	9	9	8	9	10	9	9	9	8	9	10	12.9	12.9	12.9	132.09	1259	1259	0	96.34	By MS/MS	By MS/MS	By MS/MS	By MS/MS	By MS/MS	By MS/MS	10.2	10.6	10.2	9.1	8.7	9.6	3766500	744460
Cre06.g259100.t1.1	Cre06.g259100.t1.1	79	79	79	Cre06.g259100.t1.1 pacid=30778684 annot-version=v5.5	1	79	79	79	73	63	56	64	58	59	73	63	56	64	58	59	73	63	56	64	58	59	58.3	58.3	58.3	138.44	1304	1304	0	323.31	By MS/MS	By MS/MS	By MS/MS	By MS/MS	By MS/MS	By MS/MS	54.1	52.4	47.9	50.2	47.5	49.7	36327000	12535000
Cre06.g259800.t1.2	Cre06.g259800.t1.2	4	4	4	Cre06.g259800.t1.2 pacid=30780079 gene-symbol=CWC22 definition=Cwc22 pre-mRNA splicing factor annot-version=v5.5	1	4	4	4	4	3	3	2	2	1	4	3	3	2	2	1	4	3	3	2	2	1	6.1	6.1	6.1	102.22	928	928	0	33.504	By MS/MS	By MS/MS	By MS/MS	By MS/MS	By MS/MS	By MS/MS	6.1	4.7	4.7	2.9	2.9	1.8	632820	144990
Cre06.g259850.t1.2	Cre06.g259850.t1.2	2	2	2	Cre06.g259850.t1.2 pacid=30779000 gene-symbol=PRPL29 definition=Putative chloroplast ribosomal protein L29 annot-version=v5.5	1	2	2	2	2	1	0	1	1	1	2	1	0	1	1	1	2	1	0	1	1	1	15.7	15.7	15.7	14.937	134	134	0	14.351	By MS/MS	By MS/MS		By matching	By matching	By MS/MS	15.7	11.2	0	11.2	15.7	15.7	199800	122410
Cre06.g259900.t1.2	Cre06.g259900.t1.2	2	2	2	Cre06.g259900.t1.2 pacid=30779752 gene-symbol=ATPC definition=Chloroplast ATP synthase gamma chain annot-version=v5.5	1	2	2	2	2	2	1	2	2	1	2	2	1	2	2	1	2	2	1	2	2	1	8.4	8.4	8.4	38.76	358	358	0	13.199	By MS/MS	By MS/MS	By MS/MS	By MS/MS	By MS/MS	By MS/MS	8.4	8.4	3.6	8.4	8.4	3.6	586270	198520
Cre06.g260850.t1.2	Cre06.g260850.t1.2	2	2	2	Cre06.g260850.t1.2 pacid=30778981 gene-symbol=NOP14 definition=Nucleolar protein annot-version=v5.5	1	2	2	2	2	2	2	1	1	1	2	2	2	1	1	1	2	2	2	1	1	1	3.3	3.3	3.3	121.31	1137	1137	0	12.33	By MS/MS	By MS/MS	By MS/MS	By MS/MS	By matching	By MS/MS	3.3	3.3	3.3	1.7	1.7	1.7	221050	73932
Cre06.g261400.t1.1	Cre06.g261400.t1.1	5	5	5	Cre06.g261400.t1.1 pacid=30779462 annot-version=v5.5	1	5	5	5	4	4	4	1	3	2	4	4	4	1	3	2	4	4	4	1	3	2	2.6	2.6	2.6	243.71	2407	2407	0	36.51	By MS/MS	By MS/MS	By MS/MS	By matching	By MS/MS	By matching	2.1	2.1	2.1	0.5	1.4	0.8	579350	203760
Cre06.g261450.t1.2	Cre06.g261450.t1.2	7	7	7	Cre06.g261450.t1.2 pacid=30780082 definition=High mobility group protein annot-version=v5.5	1	7	7	7	7	5	4	7	7	7	7	5	4	7	7	7	7	5	4	7	7	7	30.2	30.2	30.2	19.515	179	179	0	62.501	By MS/MS	By MS/MS	By MS/MS	By MS/MS	By MS/MS	By MS/MS	30.2	29.1	21.2	30.2	30.2	30.2	7101300	1008200
Cre06.g262900.t1.2	Cre06.g262900.t1.2	16	15	15	Cre06.g262900.t1.2 pacid=30779670 gene-symbol=PFK1 definition=Phosphofructokinase annot-version=v5.5	1	16	15	15	15	12	10	13	12	13	14	11	9	12	11	12	14	11	9	12	11	12	33.1	31.4	31.4	56.561	529	529	0	153.09	By MS/MS	By MS/MS	By MS/MS	By MS/MS	By MS/MS	By MS/MS	31.4	26.3	21.6	28	26.8	26.7	17781000	6349700
Cre06.g263250.t1.1	Cre06.g263250.t1.1	6	6	6	Cre06.g263250.t1.1 pacid=30779447 annot-version=v5.5	1	6	6	6	6	4	1	3	3	2	6	4	1	3	3	2	6	4	1	3	3	2	58.9	58.9	58.9	322.93	3721	3721	0	68.165	By MS/MS	By MS/MS	By matching	By MS/MS	By MS/MS	By MS/MS	58.9	52.6	0.5	52.6	57.9	52.1	757450	449960
Cre12.g498600.t1.2;Cre06.g263450.t1.2;Cre06.g263450.t2.1	Cre12.g498600.t1.2;Cre06.g263450.t1.2;Cre06.g263450.t2.1	15;15;14	15;15;14	15;15;14	Cre12.g498600.t1.2 pacid=30792534 gene-symbol=EEF1A1 definition=Eukaryotic translation elongation factor 1 alpha annot-version=v5.5;Cre06.g263450.t1.2 pacid=30779125 gene-symbol=EEF1A3 definition=Putative eukaryotic translation initiation fact	3	15	15	15	14	12	11	10	9	11	14	12	11	10	9	11	14	12	11	10	9	11	30.3	30.3	30.3	55.097	502	502;463;404	0	98.88	By MS/MS	By MS/MS	By MS/MS	By MS/MS	By MS/MS	By MS/MS	28.1	24.1	20.7	23.7	15.5	22.9	7717600	2794900
Cre06.g264300.t1.2	Cre06.g264300.t1.2	4	4	4	Cre06.g264300.t1.2 pacid=30780052 gene-symbol=PRPS15 definition=Chloroplast ribosomal protein S15 annot-version=v5.5	1	4	4	4	4	3	2	2	0	1	4	3	2	2	0	1	4	3	2	2	0	1	23.4	23.4	23.4	15.788	141	141	0	23.061	By MS/MS	By MS/MS	By MS/MS	By MS/MS		By matching	23.4	17.7	17.7	17.7	0	9.9	254240	143060
Cre06.g264500.t1.2	Cre06.g264500.t1.2	2	2	2	Cre06.g264500.t1.2 pacid=30780177 annot-version=v5.5	1	2	2	2	2	1	1	1	1	0	2	1	1	1	1	0	2	1	1	1	1	0	4.6	4.6	4.6	47.422	459	459	0	11.989	By MS/MS	By MS/MS	By MS/MS	By MS/MS	By MS/MS		4.6	2.4	2.4	2.4	2.4	0	71407	20124
Cre06.g264600.t1.2;Cre12.g504600.t1.2;Cre17.g714600.t1.2;Cre17.g714000.t1.2;Cre17.g713500.t1.2;Cre17.g711800.t1.2;Cre17.g710500.t1.2;Cre17.g709100.t1.2;Cre17.g708650.t1.2;Cre17.g708200.t1.2;Cre16.g650250.t1.2;Cre16.g649950.t1.2;Cre12.g506450.t1.2;Cre12.g506350.t1.2;Cre12.g505450.t1.2;Cre12.g504850.t1.2;Cre06.g276800.t1.2;Cre06.g268400.t1.2;Cre06.g265050.t1.2;Cre06.g265200.t1.2;Cre06.g265450.t1.2;…	Cre06.g264600.t1.2;Cre12.g504600.t1.2;Cre17.g714600.t1.2;Cre17.g714000.t1.2;Cre17.g713500.t1.2;Cre17.g711800.t1.2;Cre17.g710500.t1.2;Cre17.g709100.t1.2;Cre17.g708650.t1.2;Cre17.g708200.t1.2;Cre16.g650250.t1.2;Cre16.g649950.t1.2;Cre12.g506450.t1.2;Cre12.g506350.t1.2;Cre12.g505450.t1.2;Cre12.g504850.t1.2;Cre06.g276800.t1.2;Cre06.g268400.t1.2;Cre06.g265050.t1.2;Cre06.g265200.t1.2;Cre06.g265450.t1.2;…	10;10;10;10;10;10;10;10;10;10;10;10;10;10;10;10;10;10;10;10;10;10;10;10;10;10;10;10;10;10;9;9;3	10;10;10;10;10;10;10;10;10;10;10;10;10;10;10;10;10;10;10;10;10;10;10;10;10;10;10;10;10;10;9;9;3	10;10;10;10;10;10;10;10;10;10;10;10;10;10;10;10;10;10;10;10;10;10;10;10;10;10;10;10;10;10;9;9;3	Cre06.g264600.t1.2 pacid=30778471 gene-symbol=HFO14 definition=Histone H4 annot-version=v5.5;Cre12.g504600.t1.2 pacid=30793030 gene-symbol=HFO15 definition=Histone H4 annot-version=v5.5;Cre17.g714600.t1.2 pacid=30781701 gene-symbol=HFO33	33	10	10	10	9	10	9	9	9	9	9	10	9	9	9	9	9	10	9	9	9	9	68.9	68.9	68.9	11.457	103	103;103;103;103;103;103;103;103;103;103;103;103;103;103;103;103;103;103;103;103;103;103;103;103;103;103;103;103;103;103;103;103;103	0	92.455	By MS/MS	By MS/MS	By MS/MS	By MS/MS	By MS/MS	By MS/MS	66	68.9	66	59.2	68.9	68.9	11667000	1791800
Cre06.g264650.t1.2;Cre12.g505500.t1.2;Cre06.g265000.t1.2;Cre17.g713950.t1.2;Cre17.g713550.t1.2;Cre17.g711850.t1.2;Cre17.g710550.t1.2;Cre17.g709050.t1.2;Cre17.g708700.t1.2;Cre17.g708150.t1.2;Cre16.g650300.t1.2;Cre16.g649900.t1.1;Cre16.g648500.t1.2;Cre13.g569950.t1.2;Cre12.g506500.t1.2;Cre12.g506300.t1.2;Cre12.g504800.t1.2;Cre17.g714650.t1.2;Cre12.g504650.t1.2;Cre06.g276850.t1.2;Cre06.g276600.t1.2;…	Cre06.g264650.t1.2;Cre12.g505500.t1.2;Cre06.g265000.t1.2;Cre17.g713950.t1.2;Cre17.g713550.t1.2;Cre17.g711850.t1.2;Cre17.g710550.t1.2;Cre17.g709050.t1.2;Cre17.g708700.t1.2;Cre17.g708150.t1.2;Cre16.g650300.t1.2;Cre16.g649900.t1.1;Cre16.g648500.t1.2;Cre13.g569950.t1.2;Cre12.g506500.t1.2;Cre12.g506300.t1.2;Cre12.g504800.t1.2;Cre17.g714650.t1.2;Cre12.g504650.t1.2;Cre06.g276850.t1.2;Cre06.g276600.t1.2;…	10;10;10;10;10;10;10;10;10;10;10;10;10;10;10;10;10;10;10;10;10;10;10;10;10;10;10;10;10;10;10;10;4	10;10;10;10;10;10;10;10;10;10;10;10;10;10;10;10;10;10;10;10;10;10;10;10;10;10;10;10;10;10;10;10;4	8;8;8;8;8;8;8;8;8;8;8;8;8;8;8;8;8;8;8;8;8;8;8;8;8;8;8;8;8;8;8;8;2	Cre06.g264650.t1.2 pacid=30779911 gene-symbol=HTR14 definition=Histone H3 annot-version=v5.5;Cre12.g505500.t1.2 pacid=30793498 gene-symbol=HTR17 definition=Histone H3 annot-version=v5.5;Cre06.g265000.t1.2 pacid=30778874 gene-symbol=HTR13	33	10	10	8	7	6	4	5	4	10	7	6	4	5	4	10	5	4	2	5	3	8	37	37	28.1	15.31	135	135;135;192;135;135;135;135;135;135;135;135;135;135;135;135;135;135;135;135;135;135;135;135;135;135;135;135;135;135;135;135;135;232	0	91.326	By MS/MS	By MS/MS	By MS/MS	By MS/MS	By MS/MS	By MS/MS	36.3	34.1	24.4	28.1	28.9	37	13526000	2441900
Cre06.g264750.t1.2;Cre17.g708550.t1.2;Cre06.g264950.t1.2;Cre06.g265350.t1.2;Cre06.g266700.t1.2;Cre06.g268050.t1.2;Cre13.g591150.t1.2;Cre13.g590800.t1.2;Cre12.g506250.t1.2;Cre12.g505550.t1.2;Cre12.g504750.t1.2;Cre12.g504500.t1.2;Cre06.g268300.t1.2;Cre06.g274800.t1.2;Cre06.g273900.t1.2;Cre06.g271350.t1.2;Cre06.g275850.t1.2;Cre17.g714100.t1.2;Cre17.g713400.t1.2;Cre17.g711700.t1.2;Cre17.g710400.t1.2;…	Cre06.g264750.t1.2;Cre17.g708550.t1.2;Cre06.g264950.t1.2;Cre06.g265350.t1.2;Cre06.g266700.t1.2;Cre06.g268050.t1.2;Cre13.g591150.t1.2;Cre13.g590800.t1.2;Cre12.g506250.t1.2;Cre12.g505550.t1.2;Cre12.g504750.t1.2;Cre12.g504500.t1.2;Cre06.g268300.t1.2;Cre06.g274800.t1.2;Cre06.g273900.t1.2;Cre06.g271350.t1.2;Cre06.g275850.t1.2;Cre17.g714100.t1.2;Cre17.g713400.t1.2;Cre17.g711700.t1.2;Cre17.g710400.t1.2;…	8;8;8;8;8;8;8;8;8;8;8;8;8;8;8;8;8;8;8;8;8;8;8;8;8;8;8;1	8;8;8;8;8;8;8;8;8;8;8;8;8;8;8;8;8;8;8;8;8;8;8;8;8;8;8;1	7;7;7;7;7;7;7;7;7;7;7;7;7;7;7;7;7;7;7;7;7;7;7;7;7;7;7;1	Cre06.g264750.t1.2 pacid=30778682 gene-symbol=HTA14 definition=Histone H2A annot-version=v5.5;Cre17.g708550.t1.2 pacid=30781878 gene-symbol=HTA27 definition=Histone H2A annot-version=v5.5;Cre06.g264950.t1.2 pacid=30779952 gene-symbol=HTA	28	8	8	7	7	6	5	5	3	8	7	6	5	5	3	8	6	5	4	5	3	7	39.4	39.4	39.4	13.841	132	132;129;132;132;132;132;132;132;130;130;130;130;130;130;130;130;130;129;129;129;129;129;129;129;129;129;129;100	0	146.06	By MS/MS	By MS/MS	By MS/MS	By MS/MS	By MS/MS	By MS/MS	39.4	39.4	28.8	39.4	22	39.4	69897000	24616000
Cre06.g265800.t1.2	Cre06.g265800.t1.2	2	2	2	Cre06.g265800.t1.2 pacid=30779397 gene-symbol=PRPL28 definition=Chloroplast ribosomal protein L28, imported to chloroplast annot-version=v5.5	1	2	2	2	1	2	1	1	1	0	1	2	1	1	1	0	1	2	1	1	1	0	12.8	12.8	12.8	21.907	195	195	0	13.03	By MS/MS	By MS/MS	By MS/MS	By MS/MS	By MS/MS		8.7	12.8	8.7	8.7	8.7	0	269690	79296
Cre06.g268600.t1.2	Cre06.g268600.t1.2	5	5	5	Cre06.g268600.t1.2 pacid=30779749 gene-symbol=NAB1 definition=Nucleic acid binding protein annot-version=v5.5	1	5	5	5	4	3	5	3	5	4	4	3	5	3	5	4	4	3	5	3	5	4	27.1	27.1	27.1	26.538	247	247	0	40.654	By MS/MS	By MS/MS	By MS/MS	By MS/MS	By MS/MS	By MS/MS	22.7	11.7	27.1	21.9	27.1	26.3	1707400	474220
Cre06.g268700.t1.1	Cre06.g268700.t1.1	7	7	7	Cre06.g268700.t1.1 pacid=30779986 annot-version=v5.5	1	7	7	7	5	6	5	3	3	3	5	6	5	3	3	3	5	6	5	3	3	3	11.8	11.8	11.8	92.624	819	819	0	56.695	By MS/MS	By MS/MS	By MS/MS	By MS/MS	By MS/MS	By MS/MS	8.5	10.5	9	4.8	4.4	4.2	785710	268570
Cre06.g269050.t1.2	Cre06.g269050.t1.2	7	7	7	Cre06.g269050.t1.2 pacid=30779340 gene-symbol=TIC62 definition=possible chloroplast protein translocon component Tic62 annot-version=v5.5	1	7	7	7	6	4	7	5	5	5	6	4	7	5	5	5	6	4	7	5	5	5	12.4	12.4	12.4	91.204	898	898	0	48.184	By MS/MS	By MS/MS	By MS/MS	By MS/MS	By MS/MS	By MS/MS	10.2	6.5	12.4	8.6	8.5	7.5	1945200	768170
Cre06.g269950.t1.2	Cre06.g269950.t1.2	6	6	6	Cre06.g269950.t1.2 pacid=30778959 gene-symbol=CDC48 definition=Cell Division Cycle protein 48 annot-version=v5.5	1	6	6	6	6	4	1	4	2	3	6	4	1	4	2	3	6	4	1	4	2	3	8.6	8.6	8.6	90.23	817	817	0	39.566	By MS/MS	By MS/MS	By matching	By MS/MS	By MS/MS	By MS/MS	8.6	6.9	1.5	5.4	1.6	5.3	518940	261490
Cre06.g270600.t1.1	Cre06.g270600.t1.1	4	4	4	Cre06.g270600.t1.1 pacid=30779270 annot-version=v5.5	1	4	4	4	4	2	3	4	4	4	4	2	3	4	4	4	4	2	3	4	4	4	3.6	3.6	3.6	134.75	1281	1281	0	29.107	By MS/MS	By MS/MS	By MS/MS	By MS/MS	By MS/MS	By MS/MS	3.6	1.9	3	3.6	3.6	3.6	1347300	536170
Cre06.g270750.t1.1	Cre06.g270750.t1.1	2	2	2	Cre06.g270750.t1.1 pacid=30779787 annot-version=v5.5	1	2	2	2	0	2	1	1	2	1	0	2	1	1	2	1	0	2	1	1	2	1	2.3	2.3	2.3	90.946	887	887	0	12.132		By matching	By matching	By MS/MS	By MS/MS	By matching	0	2.3	1.4	0.9	2.3	0.9	107970	0
Cre06.g272800.t1.2	Cre06.g272800.t1.2	3	3	3	Cre06.g272800.t1.2 pacid=30780026 gene-symbol=RPS8 definition=Cytosolic 80S ribosomal protein S8 annot-version=v5.5	1	3	3	3	3	3	3	3	1	2	3	3	3	3	1	2	3	3	3	3	1	2	17.8	17.8	17.8	23.895	208	208	0	22.353	By MS/MS	By MS/MS	By MS/MS	By MS/MS	By matching	By MS/MS	17.8	17.8	17.8	17.8	6.7	13.9	394010	77266
Cre06.g272950.t1.1	Cre06.g272950.t1.1	8	8	8	Cre06.g272950.t1.1 pacid=30778811 gene-symbol=RPS18 definition=Cytosolic 80S ribosomal protein S18 annot-version=v5.5	1	8	8	8	8	7	5	5	6	7	8	7	5	5	6	7	8	7	5	5	6	7	54.9	54.9	54.9	17.579	153	153	0	75.383	By MS/MS	By MS/MS	By MS/MS	By MS/MS	By MS/MS	By MS/MS	54.9	53.6	34	41.8	41.8	53.6	4003000	1254600
Cre06.g273413.t1.1	Cre06.g273413.t1.1	12	12	12	Cre06.g273413.t1.1 pacid=30779691 annot-version=v5.5	1	12	12	12	9	11	10	8	8	10	9	11	10	8	8	10	9	11	10	8	8	10	17.2	17.2	17.2	93.885	900	900	0	85.421	By MS/MS	By MS/MS	By MS/MS	By MS/MS	By MS/MS	By MS/MS	15.6	14.7	14.4	13.7	12.4	14.4	3406100	958310
Cre06.g273450.t1.1	Cre06.g273450.t1.1	13	13	13	Cre06.g273450.t1.1 pacid=30779405 annot-version=v5.5	1	13	13	13	11	11	9	10	10	8	11	11	9	10	10	8	11	11	9	10	10	8	33.4	33.4	33.4	41.494	380	380	0	90.396	By MS/MS	By MS/MS	By MS/MS	By MS/MS	By MS/MS	By MS/MS	28.9	29.5	26.3	29.5	28.2	23.4	3408400	1204500
Cre06.g273600.t1.2	Cre06.g273600.t1.2	4	4	4	Cre06.g273600.t1.2 pacid=30779902 gene-symbol=RPS27A definition=Cytosolic 80S ribosomal protein S27a annot-version=v5.5	1	4	4	4	4	4	3	4	2	3	4	4	3	4	2	3	4	4	3	4	2	3	26.9	26.9	26.9	19.51	182	182	0	31.695	By MS/MS	By MS/MS	By MS/MS	By MS/MS	By MS/MS	By MS/MS	26.9	26.9	20.3	26.9	19.8	17.6	744810	199190
Cre06.g275900.t1.2	Cre06.g275900.t1.2	5	5	5	Cre06.g275900.t1.2 pacid=30778835 gene-symbol=HON3 definition=Histone H1 annot-version=v5.5	1	5	5	5	4	5	5	4	4	4	4	5	5	4	4	4	4	5	5	4	4	4	14.2	14.2	14.2	24.692	232	232	0	48.791	By MS/MS	By MS/MS	By MS/MS	By MS/MS	By MS/MS	By MS/MS	14.2	14.2	14.2	9.9	9.9	14.2	21080000	4247100
Cre06.g278128.t1.1	Cre06.g278128.t1.1	4	4	4	Cre06.g278128.t1.1 pacid=30778947 annot-version=v5.5	1	4	4	4	1	3	2	3	2	3	1	3	2	3	2	3	1	3	2	3	2	3	13.5	13.5	13.5	43.646	445	445	0	28.409	By matching	By MS/MS	By MS/MS	By MS/MS	By MS/MS	By MS/MS	4.5	8.8	7.2	8.8	6.3	8.8	575870	63422
Cre06.g278175.t1.1	Cre06.g278175.t1.1	7	7	7	Cre06.g278175.t1.1 pacid=30779333 annot-version=v5.5	1	7	7	7	7	6	4	5	2	5	7	6	4	5	2	5	7	6	4	5	2	5	27.2	27.2	27.2	51.407	481	481	0	52.04	By MS/MS	By MS/MS	By MS/MS	By MS/MS	By MS/MS	By MS/MS	27.2	17.9	12.1	15.2	5.6	14.6	1338200	443140
Cre06.g278239.t2.1;Cre06.g278239.t1.1	Cre06.g278239.t2.1;Cre06.g278239.t1.1	17;17	17;17	17;17	Cre06.g278239.t2.1 pacid=30779802 gene-symbol=SRS7 definition=Serine/arginine-rich pre-mRNA splicing factor annot-version=v5.5;Cre06.g278239.t1.1 pacid=30779801 gene-symbol=SRS7 definition=Serine/arginine-rich pre-mRNA splicing factor annot-v	2	17	17	17	15	14	9	13	8	10	15	14	9	13	8	10	15	14	9	13	8	10	40.1	40.1	40.1	32.705	294	294;320	0	185.6	By MS/MS	By MS/MS	By MS/MS	By MS/MS	By MS/MS	By MS/MS	38.1	38.8	25.9	39.8	29.6	29.6	14735000	5171300
Cre06.g278254.t1.1	Cre06.g278254.t1.1	4	4	4	Cre06.g278254.t1.1 pacid=30779516 annot-version=v5.5	1	4	4	4	3	4	4	4	3	4	3	4	4	4	3	4	3	4	4	4	3	4	10.4	10.4	10.4	71.37	657	657	0	31.724	By MS/MS	By MS/MS	By MS/MS	By MS/MS	By MS/MS	By MS/MS	8.5	10.4	10.4	10.4	8.5	10.4	905690	208640
Cre06.g282500.t1.2	Cre06.g282500.t1.2	4	4	4	Cre06.g282500.t1.2 pacid=30779252 gene-symbol=RPL23A definition=Cytosolic 80S ribosomal protein L23a annot-version=v5.5	1	4	4	4	4	3	2	4	2	2	4	3	2	4	2	2	4	3	2	4	2	2	23.8	23.8	23.8	16.399	147	147	0	25.235	By MS/MS	By MS/MS	By MS/MS	By MS/MS	By MS/MS	By MS/MS	23.8	23.8	17.7	23.8	17.7	23.8	1119800	570250
Cre06.g282800.t1.2	Cre06.g282800.t1.2	4	4	4	Cre06.g282800.t1.2 pacid=30779483 gene-symbol=ICL1 definition=Isocitrate lyase annot-version=v5.5	1	4	4	4	3	4	2	1	1	0	3	4	2	1	1	0	3	4	2	1	1	0	12.7	12.7	12.7	45.748	417	417	0	33.549	By MS/MS	By MS/MS	By MS/MS	By matching	By matching		12.5	12.7	8.4	3.6	4.1	0	483750	116140
Cre06.g285250.t1.2;Cre06.g284250.t1.2;Cre06.g283950.t1.2	Cre06.g285250.t1.2;Cre06.g284250.t1.2;Cre06.g283950.t1.2	3;3;3	3;3;3	3;3;3	Cre06.g285250.t1.2 pacid=30779463 gene-symbol=LHCBM6 definition=Light-harvesting Chloropyll a/b binding protein of LHCII type I, chloroplast precursor annot-version=v5.5;Cre06.g284250.t1.2 pacid=30779962 gene-symbol=LHCBM8 definition=Light-har	3	3	3	3	2	2	1	3	2	1	2	2	1	3	2	1	2	2	1	3	2	1	11.9	11.9	11.9	26.96	253	253;254;254	0	21.557	By MS/MS	By MS/MS	By MS/MS	By MS/MS	By MS/MS	By MS/MS	5.1	5.1	4.3	11.9	5.1	4.3	799900	176330
Cre06.g285401.t1.1	Cre06.g285401.t1.1	13	13	13	Cre06.g285401.t1.1 pacid=30779990 gene-symbol=FAP355 definition=Histone-like Flagellar Associated protein annot-version=v5.5	1	13	13	13	11	13	9	9	7	12	11	13	9	9	7	12	11	13	9	9	7	12	48.9	48.9	48.9	17.857	178	178	0	323.31	By MS/MS	By MS/MS	By MS/MS	By MS/MS	By MS/MS	By MS/MS	38.8	48.9	30.3	42.1	44.4	48.9	75785000	16987000
Cre06.g288750.t1.2	Cre06.g288750.t1.2	5	5	5	Cre06.g288750.t1.2 pacid=30780037 gene-symbol=CBP20 definition=Nuclear RNA cap-binding protein annot-version=v5.5	1	5	5	5	5	5	5	4	3	4	5	5	5	4	3	4	5	5	5	4	3	4	28.8	28.8	28.8	17.372	163	163	0	42.585	By MS/MS	By MS/MS	By MS/MS	By MS/MS	By MS/MS	By MS/MS	28.8	28.8	28.8	28.8	22.1	28.8	1884600	566040
Cre06.g289550.t1.2	Cre06.g289550.t1.2	3	3	3	Cre06.g289550.t1.2 pacid=30780114 gene-symbol=RPL32 definition=Cytosolic 80S ribosomal protein L32 annot-version=v5.5	1	3	3	3	3	3	2	1	0	2	3	3	2	1	0	2	3	3	2	1	0	2	22.6	22.6	22.6	15.48	133	133	0	20.163	By MS/MS	By MS/MS	By MS/MS	By MS/MS		By MS/MS	22.6	22.6	21.1	12.8	0	22.6	685520	284560
Cre06.g290950.t1.2	Cre06.g290950.t1.2	5	5	5	Cre06.g290950.t1.2 pacid=30779633 gene-symbol=RPS5 definition=Cytosolic 80S ribosomal protein S5 annot-version=v5.5	1	5	5	5	3	5	4	5	3	4	3	5	4	5	3	4	3	5	4	5	3	4	25.9	25.9	25.9	21.638	193	193	0	59.806	By MS/MS	By MS/MS	By MS/MS	By MS/MS	By MS/MS	By MS/MS	19.7	25.9	25.4	25.9	19.7	25.4	2782600	640550
Cre06.g291350.t1.1	Cre06.g291350.t1.1	3	3	3	Cre06.g291350.t1.1 pacid=30780110 annot-version=v5.5	1	3	3	3	0	3	1	0	1	1	0	3	1	0	1	1	0	3	1	0	1	1	3.4	3.4	3.4	108.86	1015	1015	0	17.531		By MS/MS	By MS/MS		By MS/MS	By matching	0	3.4	1.4	0	1.4	1.2	105990	0
Cre06.g291700.t1.2	Cre06.g291700.t1.2	3	3	3	Cre06.g291700.t1.2 pacid=30780122 gene-symbol=RSP3 definition=Radial spoke protein 3 annot-version=v5.5	1	3	3	3	3	0	0	0	0	1	3	0	0	0	0	1	3	0	0	0	0	1	9.7	9.7	9.7	56.784	516	516	0	17.969	By MS/MS					By matching	9.7	0	0	0	0	3.9	95978	92317
Cre06.g297750.t1.2	Cre06.g297750.t1.2	2	2	2	Cre06.g297750.t1.2 pacid=30779151 definition=SF3A3 splicing factor 3a, subunit 3 annot-version=v5.5	1	2	2	2	2	1	1	0	0	1	2	1	1	0	0	1	2	1	1	0	0	1	3.5	3.5	3.5	61.591	543	543	0	13.796	By MS/MS	By MS/MS	By MS/MS			By matching	3.5	1.8	1.7	0	0	1.8	175250	117100
Cre06.g298650.t1.2	Cre06.g298650.t1.2	3	3	3	Cre06.g298650.t1.2 pacid=30780155 gene-symbol=EIF4A definition=Eukaryotic initiation factor 4A annot-version=v5.5	1	3	3	3	3	3	2	3	1	2	3	3	2	3	1	2	3	3	2	3	1	2	6.7	6.7	6.7	52.861	464	464	0	20.023	By MS/MS	By MS/MS	By MS/MS	By MS/MS	By MS/MS	By MS/MS	6.7	6.7	5.2	6.7	2.2	3.7	531230	187040
Cre06.g300750.t1.1	Cre06.g300750.t1.1	12	12	12	Cre06.g300750.t1.1 pacid=30778538 annot-version=v5.5	1	12	12	12	8	11	8	7	7	7	8	11	8	7	7	7	8	11	8	7	7	7	10.3	10.3	10.3	201.2	1844	1844	0	117.9	By MS/MS	By MS/MS	By MS/MS	By MS/MS	By MS/MS	By MS/MS	7.2	9.2	7	6.3	6.5	6.2	2483300	549170
Cre06.g303500.t1.2	Cre06.g303500.t1.2	3	3	3	Cre06.g303500.t1.2 pacid=30780054 annot-version=v5.5	1	3	3	3	3	3	2	3	1	2	3	3	2	3	1	2	3	3	2	3	1	2	5.7	5.7	5.7	65.087	597	597	0	30.938	By MS/MS	By MS/MS	By MS/MS	By MS/MS	By MS/MS	By MS/MS	5.7	5.7	5.4	5.7	3	3.4	618890	247590
Cre06.g306100.t2.1;Cre06.g306100.t1.2	Cre06.g306100.t2.1;Cre06.g306100.t1.2	2;2	2;2	2;2	Cre06.g306100.t2.1 pacid=30778556 annot-version=v5.5;Cre06.g306100.t1.2 pacid=30778555 annot-version=v5.5	2	2	2	2	1	1	2	1	0	0	1	1	2	1	0	0	1	1	2	1	0	0	13.1	13.1	13.1	14.446	137	137;137	0	11.992	By MS/MS	By matching	By MS/MS	By MS/MS			11.7	11.7	13.1	11.7	0	0	108890	32432
Cre06.g307250.t1.2	Cre06.g307250.t1.2	7	7	7	Cre06.g307250.t1.2 pacid=30779222 annot-version=v5.5	1	7	7	7	5	6	4	6	3	5	5	6	4	6	3	5	5	6	4	6	3	5	6.6	6.6	6.6	134.07	1285	1285	0	51.886	By MS/MS	By MS/MS	By MS/MS	By MS/MS	By MS/MS	By MS/MS	5.4	6	4.8	6.5	4.1	4.7	1651600	595090
Cre06.g308250.t1.2	Cre06.g308250.t1.2	3	3	3	Cre06.g308250.t1.2 pacid=30778562 gene-symbol=RPS4 definition=Cytosolic 80S ribosomal protein S4 annot-version=v5.5	1	3	3	3	3	2	1	1	0	1	3	2	1	1	0	1	3	2	1	1	0	1	10.3	10.3	10.3	29.483	261	261	0	18.338	By MS/MS	By MS/MS	By MS/MS	By MS/MS		By matching	10.3	10.3	3.1	3.1	0	3.1	214260	94750
Cre06.g311450.t1.1	Cre06.g311450.t1.1	3	3	3	Cre06.g311450.t1.1 pacid=30779273 annot-version=v5.5	1	3	3	3	2	2	2	2	3	0	2	2	2	2	3	0	2	2	2	2	3	0	1	1	1	393.56	4017	4017	0	17.24	By MS/MS	By MS/MS	By MS/MS	By MS/MS	By MS/MS		0.7	0.8	0.8	0.5	1	0	215500	46680
Cre07.g313185.t1.1	Cre07.g313185.t1.1	2	2	2	Cre07.g313185.t1.1 pacid=30774898 annot-version=v5.5	1	2	2	2	2	1	1	2	2	1	2	1	1	2	2	1	2	1	1	2	2	1	15	15	15	15.904	140	140	0	15.577	By MS/MS	By MS/MS	By MS/MS	By MS/MS	By MS/MS	By MS/MS	15	10	10	15	15	10	690720	198630
Cre07.g313302.t1.1	Cre07.g313302.t1.1	3	3	3	Cre07.g313302.t1.1 pacid=30774295 annot-version=v5.5	1	3	3	3	3	3	2	2	3	3	3	3	2	2	3	3	3	3	2	2	3	3	9.3	9.3	9.3	42.199	386	386	0	18.584	By MS/MS	By MS/MS	By MS/MS	By MS/MS	By MS/MS	By MS/MS	9.3	9.3	5.2	5.2	9.3	9.3	1113300	369960
Cre07.g314100.t1.2	Cre07.g314100.t1.2	5	5	5	Cre07.g314100.t1.2 pacid=30774816 annot-version=v5.5	1	5	5	5	5	4	3	3	3	3	5	4	3	3	3	3	5	4	3	3	3	3	26.2	26.2	26.2	30.696	286	286	0	40.754	By MS/MS	By MS/MS	By MS/MS	By MS/MS	By MS/MS	By MS/MS	26.2	19.2	13.6	15.7	13.6	13.6	1244000	463130
Cre07.g317100.t2.1;Cre07.g317100.t1.1	Cre07.g317100.t2.1;Cre07.g317100.t1.1	2;2	2;2	2;2	Cre07.g317100.t2.1 pacid=30774757 annot-version=v5.5;Cre07.g317100.t1.1 pacid=30774758 annot-version=v5.5	2	2	2	2	2	1	1	1	1	1	2	1	1	1	1	1	2	1	1	1	1	1	16.2	16.2	16.2	28.313	259	259;259	0	12.002	By MS/MS	By matching	By MS/MS	By matching	By MS/MS	By matching	16.2	6.6	6.6	6.6	6.6	6.6	233380	107230
Cre07.g318450.t1.2	Cre07.g318450.t1.2	2	2	2	Cre07.g318450.t1.2 pacid=30774741 gene-symbol=SEC61B definition=SEC61-beta subunit of ER-translocon annot-version=v5.5	1	2	2	2	1	2	2	0	2	1	1	2	2	0	2	1	1	2	2	0	2	1	29.3	29.3	29.3	9.4587	92	92	0	11.833	By matching	By matching	By MS/MS		By MS/MS	By matching	14.1	29.3	29.3	0	29.3	15.2	136630	12104
Cre07.g318702.t1.1	Cre07.g318702.t1.1	2	2	2	Cre07.g318702.t1.1 pacid=30774297 annot-version=v5.5	1	2	2	2	2	2	1	1	1	2	2	2	1	1	1	2	2	2	1	1	1	2	7.1	7.1	7.1	50.957	449	449	0.0021413	11.082	By MS/MS	By MS/MS	By matching	By matching	By MS/MS	By MS/MS	7.1	7.1	5.3	5.3	1.8	7.1	118850	40914
Cre07.g321400.t1.1	Cre07.g321400.t1.1	3	3	3	Cre07.g321400.t1.1 pacid=30774910 gene-symbol=MAW6 definition=Membrane-associated hydroxyproline-rich glycoprotein 6 annot-version=v5.5	1	3	3	3	3	2	3	2	1	1	3	2	3	2	1	1	3	2	3	2	1	1	2.3	2.3	2.3	199.24	1914	1914	0	18.499	By MS/MS	By MS/MS	By MS/MS	By MS/MS	By MS/MS	By MS/MS	2.3	1.5	2.3	1.5	0.7	0.7	299970	97499
Cre07.g322176.t1.1	Cre07.g322176.t1.1	12	12	12	Cre07.g322176.t1.1 pacid=30775305 annot-version=v5.5	1	12	12	12	11	11	12	7	8	10	11	11	12	7	8	10	11	11	12	7	8	10	12.3	12.3	12.3	113.51	1047	1047	0	81.018	By MS/MS	By MS/MS	By MS/MS	By MS/MS	By MS/MS	By MS/MS	11.5	11	12.3	6.8	8.1	10.4	2872900	1007000
Cre07.g325450.t1.1	Cre07.g325450.t1.1	5	5	5	Cre07.g325450.t1.1 pacid=30774829 annot-version=v5.5	1	5	5	5	5	4	3	1	5	5	5	4	3	1	5	5	5	4	3	1	5	5	16.2	16.2	16.2	68.564	631	631	0	112.82	By MS/MS	By MS/MS	By MS/MS	By matching	By MS/MS	By MS/MS	16.2	11.1	6.3	3	16.2	16.2	1119200	389420
Cre07.g325736.t1.1	Cre07.g325736.t1.1	7	7	7	Cre07.g325736.t1.1 pacid=30774660 annot-version=v5.5	1	7	7	7	7	5	5	7	4	6	7	5	5	7	4	6	7	5	5	7	4	6	13.8	13.8	13.8	56.209	530	530	0	50.373	By MS/MS	By MS/MS	By MS/MS	By MS/MS	By MS/MS	By MS/MS	13.8	9.2	9.2	13.8	11.3	13.8	1597900	606260
Cre07.g325762.t1.1	Cre07.g325762.t1.1	2	2	2	Cre07.g325762.t1.1 pacid=30775011 gene-symbol=DRC11 definition=Nexin-dynein regulatory complex 11 annot-version=v5.5	1	2	2	2	2	1	1	1	1	0	2	1	1	1	1	0	2	1	1	1	1	0	2.3	2.3	2.3	94.722	836	836	0	14.311	By MS/MS	By MS/MS	By MS/MS	By matching	By MS/MS		2.3	2.3	2.3	1.9	2.3	0	178970	65468
Cre07.g326350.t1.1	Cre07.g326350.t1.1	3	3	3	Cre07.g326350.t1.1 pacid=30774994 annot-version=v5.5	1	3	3	3	3	0	3	1	1	2	3	0	3	1	1	2	3	0	3	1	1	2	9.7	9.7	9.7	45.19	422	422	0	22.159	By MS/MS		By MS/MS	By MS/MS	By matching	By MS/MS	9.7	0	9.7	3.6	2.4	7.3	186040	100630
Cre07.g330250.t1.2	Cre07.g330250.t1.2	3	3	3	Cre07.g330250.t1.2 pacid=30775443 gene-symbol=PSAH definition=Photosystem I reaction center subunit H annot-version=v5.5	1	3	3	3	2	2	3	2	2	2	2	2	3	2	2	2	2	2	3	2	2	2	39.2	39.2	39.2	14.151	130	130	0	26.028	By MS/MS	By MS/MS	By MS/MS	By MS/MS	By MS/MS	By matching	22.3	22.3	39.2	22.3	22.3	22.3	347410	67666
Cre07.g330900.t1.2	Cre07.g330900.t1.2	13	13	13	Cre07.g330900.t1.2 pacid=30775041 annot-version=v5.5	1	13	13	13	10	10	5	10	5	5	10	10	5	10	5	5	10	10	5	10	5	5	13.2	13.2	13.2	143.54	1400	1400	0	83.804	By MS/MS	By MS/MS	By MS/MS	By MS/MS	By MS/MS	By MS/MS	10.7	9	6.2	8.9	4.6	5.9	1796000	591440
Cre07.g332950.t1.2	Cre07.g332950.t1.2	8	8	8	Cre07.g332950.t1.2 pacid=30774533 gene-symbol=SFA1 definition=SF-assemblin annot-version=v5.5	1	8	8	8	8	7	5	6	4	5	8	7	5	6	4	5	8	7	5	6	4	5	38	38	38	31.184	276	276	0	64.956	By MS/MS	By MS/MS	By MS/MS	By MS/MS	By MS/MS	By MS/MS	38	38	24.3	30.1	18.5	26.4	3220700	1380700
Cre07.g337650.t1.2	Cre07.g337650.t1.2	2	2	2	Cre07.g337650.t1.2 pacid=30774315 gene-symbol=PDC1 definition=Mitochondrial pyruvate dehydrogenase complex, E1 component, alpha subunit annot-version=v5.5	1	2	2	2	1	2	0	2	2	2	1	2	0	2	2	2	1	2	0	2	2	2	7.6	7.6	7.6	43.71	396	396	0	13.13	By matching	By MS/MS		By MS/MS	By MS/MS	By MS/MS	3	7.6	0	7.6	7.6	7.6	520670	13063
Cre07.g338451.t1.1	Cre07.g338451.t1.1	3	3	3	Cre07.g338451.t1.1 pacid=30774250 gene-symbol=FBP1 definition=Fructose-1,6-bisphosphatase annot-version=v5.5	1	3	3	3	3	3	2	1	1	3	3	3	2	1	1	3	3	3	2	1	1	3	14.9	14.9	14.9	42.32	404	404	0	25.208	By MS/MS	By MS/MS	By MS/MS	By MS/MS	By MS/MS	By MS/MS	14.9	14.9	9.2	4.7	4.7	14.9	334140	106010
Cre07.g340350.t1.1	Cre07.g340350.t1.1	2	2	2	Cre07.g340350.t1.1 pacid=30774678 gene-symbol=ASA1 definition=Mitochondrial F1F0 ATP synthase associated protein 1 annot-version=v5.5	1	2	2	2	1	2	1	2	0	1	1	2	1	2	0	1	1	2	1	2	0	1	5.2	5.2	5.2	63.161	575	575	0	11.854	By MS/MS	By MS/MS	By MS/MS	By MS/MS		By matching	3	5.2	3	5.2	0	2.3	163560	28126
Cre07.g344050.t1.1	Cre07.g344050.t1.1	10	10	10	Cre07.g344050.t1.1 pacid=30774587 annot-version=v5.5	1	10	10	10	8	7	5	4	5	7	8	7	5	4	5	7	8	7	5	4	5	7	9.6	9.6	9.6	147.92	1453	1453	0	74.086	By MS/MS	By MS/MS	By MS/MS	By MS/MS	By MS/MS	By MS/MS	7.5	7.2	4.5	4.1	5.1	6.5	1291800	520400
Cre07.g344900.t2.1;Cre07.g344900.t1.2	Cre07.g344900.t2.1;Cre07.g344900.t1.2	4;4	4;4	4;4	Cre07.g344900.t2.1 pacid=30775074 annot-version=v5.5;Cre07.g344900.t1.2 pacid=30775073 annot-version=v5.5	2	4	4	4	3	4	4	2	4	4	3	4	4	2	4	4	3	4	4	2	4	4	13	13	13	43.566	399	399;399	0	27.167	By MS/MS	By MS/MS	By MS/MS	By MS/MS	By MS/MS	By MS/MS	9.3	13	13	6	13	13	756000	178910
Cre07.g347050.t1.2	Cre07.g347050.t1.2	3	3	3	Cre07.g347050.t1.2 pacid=30774242 gene-symbol=RSP7 definition=Radial Spoke Protein 7 annot-version=v5.5	1	3	3	3	3	3	1	0	2	1	3	3	1	0	2	1	3	3	1	0	2	1	9.4	9.4	9.4	54.729	500	500	0	23.185	By MS/MS	By MS/MS	By matching		By MS/MS	By matching	9.4	9.4	2.4	0	7	2.4	488630	264620
Cre07.g349100.t1.1	Cre07.g349100.t1.1	3	3	3	Cre07.g349100.t1.1 pacid=30774605 gene-symbol=HEL39 definition=ATP-dependent RNA helicase annot-version=v5.5	1	3	3	3	3	2	3	1	0	0	3	2	3	1	0	0	3	2	3	1	0	0	3.1	3.1	3.1	129.61	1160	1160	0	17.898	By MS/MS	By MS/MS	By MS/MS	By matching			3.1	2.2	3.1	1.1	0	0	208210	79711
Cre07.g351000.t1.1	Cre07.g351000.t1.1	14	14	14	Cre07.g351000.t1.1 pacid=30774649 definition=Protein with WW and FF domains annot-version=v5.5	1	14	14	14	14	13	10	12	10	8	14	13	10	12	10	8	14	13	10	12	10	8	13.1	13.1	13.1	103.99	975	975	0	89.036	By MS/MS	By MS/MS	By MS/MS	By MS/MS	By MS/MS	By MS/MS	13.1	12.1	10.3	11.4	8.5	8.7	3697800	1177900
Cre07.g351750.t1.2	Cre07.g351750.t1.2	2	2	2	Cre07.g351750.t1.2 pacid=30774969 annot-version=v5.5	1	2	2	2	0	2	1	0	0	0	0	2	1	0	0	0	0	2	1	0	0	0	5.6	5.6	5.6	35.753	319	319	0	15.122		By MS/MS	By matching				0	5.6	5.3	0	0	0	52620	0
Cre07.g356600.t1.2	Cre07.g356600.t1.2	2	2	2	Cre07.g356600.t1.2 pacid=30774325 annot-version=v5.5	1	2	2	2	1	2	2	1	1	2	1	2	2	1	1	2	1	2	2	1	1	2	3.1	3.1	3.1	84.662	774	774	0	14.96	By matching	By MS/MS	By MS/MS	By MS/MS	By MS/MS	By MS/MS	1.2	3.1	3.1	1.2	1.2	3.1	512460	52294
Cre07.g357850.t1.2	Cre07.g357850.t1.2	3	3	3	Cre07.g357850.t1.2 pacid=30774301 gene-symbol=RPL22 definition=Cytosolic 80S ribosomal protein L22 annot-version=v5.5	1	3	3	3	3	3	2	2	3	3	3	3	2	2	3	3	3	3	2	2	3	3	28.3	28.3	28.3	14.461	127	127	0	18.657	By MS/MS	By MS/MS	By MS/MS	By MS/MS	By matching	By MS/MS	28.3	28.3	17.3	18.1	28.3	28.3	775410	300150
Cre08.g358556.t2.1;Cre08.g358556.t1.1	Cre08.g358556.t2.1;Cre08.g358556.t1.1	2;2	2;2	2;2	Cre08.g358556.t2.1 pacid=30773442 gene-symbol=RPS29 definition=Cytosolic 80S ribosomal protein S29 annot-version=v5.5;Cre08.g358556.t1.1 pacid=30773441 gene-symbol=RPS29 definition=Cytosolic 80S ribosomal protein S29 annot-version=v5.5	2	2	2	2	2	2	1	2	2	2	2	2	1	2	2	2	2	2	1	2	2	2	26.8	26.8	26.8	6.4924	56	56;56	0	12.051	By MS/MS	By MS/MS	By MS/MS	By MS/MS	By MS/MS	By MS/MS	26.8	26.8	12.5	26.8	26.8	26.8	429610	91499
Cre08.g359750.t2.1;Cre08.g359750.t1.2	Cre08.g359750.t2.1;Cre08.g359750.t1.2	4;4	4;4	4;4	Cre08.g359750.t2.1 pacid=30774126 gene-symbol=RPS9 definition=Cytosolic 80S ribosomal protein S9 annot-version=v5.5;Cre08.g359750.t1.2 pacid=30774125 gene-symbol=RPS9 definition=Cytosolic 80S ribosomal protein S9 annot-version=v5.5	2	4	4	4	3	3	3	2	1	1	3	3	3	2	1	1	3	3	3	2	1	1	21.1	21.1	21.1	22.13	190	190;190	0	25.159	By MS/MS	By MS/MS	By MS/MS	By MS/MS	By matching	By matching	14.7	16.3	15.3	10.5	6.3	5.8	391700	68400
Cre08.g360900.t1.2	Cre08.g360900.t1.2	2	2	2	Cre08.g360900.t1.2 pacid=30773772 gene-symbol=RPS15 definition=Cytosolic 80S ribosomal protein S15 annot-version=v5.5	1	2	2	2	2	2	2	1	0	1	2	2	2	1	0	1	2	2	2	1	0	1	15.2	15.2	15.2	16.629	145	145	0	13.349	By MS/MS	By MS/MS	By MS/MS	By matching		By MS/MS	15.2	15.2	15.2	7.6	0	7.6	355670	124000
Cre08.g362500.t1.2	Cre08.g362500.t1.2	3	3	3	Cre08.g362500.t1.2 pacid=30773910 annot-version=v5.5	1	3	3	3	2	2	3	1	0	2	2	2	3	1	0	2	2	2	3	1	0	2	2.9	2.9	2.9	132.72	1291	1291	0	18.947	By MS/MS	By MS/MS	By MS/MS	By matching		By matching	2.2	1.9	2.9	1.2	0	1.6	203410	74179
Cre08.g368500.t1.2	Cre08.g368500.t1.2	3	3	3	Cre08.g368500.t1.2 pacid=30773518 annot-version=v5.5	1	3	3	3	3	2	1	2	1	1	3	2	1	2	1	1	3	2	1	2	1	1	29.8	29.8	29.8	20.775	181	181	0	19.027	By MS/MS	By MS/MS	By MS/MS	By MS/MS	By matching	By MS/MS	29.8	18.8	6.1	23.8	11	11	398760	177850
Cre08.g370601.t1.1	Cre08.g370601.t1.1	5	5	5	Cre08.g370601.t1.1 pacid=30774105 annot-version=v5.5	1	5	5	5	3	4	3	3	3	4	3	4	3	3	3	4	3	4	3	3	3	4	7.6	7.6	7.6	89.246	858	858	0	40.069	By MS/MS	By MS/MS	By MS/MS	By MS/MS	By MS/MS	By MS/MS	4.8	6.3	4.8	4.8	4.5	6.3	882130	123610
Cre08.g370650.t1.2	Cre08.g370650.t1.2	6	6	6	Cre08.g370650.t1.2 pacid=30774037 gene-symbol=PGL2 definition=6-phosphogluconolactonase annot-version=v5.5	1	6	6	6	5	4	3	4	4	5	5	4	3	4	4	5	5	4	3	4	4	5	25.5	25.5	25.5	35.812	345	345	0	37.308	By MS/MS	By MS/MS	By MS/MS	By MS/MS	By MS/MS	By MS/MS	17.1	18.6	10.1	16.8	13.9	23.2	1119700	261940
Cre08.g372100.t1.2	Cre08.g372100.t1.2	4	3	3	Cre08.g372100.t1.2 pacid=30774022 gene-symbol=HSP70A definition=Heat shock protein 70A annot-version=v5.5	1	4	3	3	3	3	4	2	2	3	2	2	3	1	1	2	2	2	3	1	1	2	8.6	6	6	71.214	651	651	0	20.867	By MS/MS	By MS/MS	By MS/MS	By MS/MS	By matching	By MS/MS	6.6	6.6	8.6	4.8	4.5	6.6	585620	194230
Cre08.g372450.t1.2	Cre08.g372450.t1.2	8	8	8	Cre08.g372450.t1.2 pacid=30773912 gene-symbol=PSBQ definition=Photosystem II Oxygen Evolution Enhancer protein 3 annot-version=v5.5	1	8	8	8	5	5	8	5	4	3	5	5	8	5	4	3	5	5	8	5	4	3	36.7	36.7	36.7	21.824	199	199	0	62.08	By MS/MS	By MS/MS	By MS/MS	By MS/MS	By MS/MS	By matching	30.7	25.6	36.7	30.7	22.6	14.6	1686500	183300
Cre08.g372800.t1.1	Cre08.g372800.t1.1	12	12	12	Cre08.g372800.t1.1 pacid=30773886 definition=Nuclear pre-mRNA splicing factor involved in polyadenylation, CPSF family annot-version=v5.5	1	12	12	12	12	8	8	9	6	9	12	8	8	9	6	9	12	8	8	9	6	9	12.3	12.3	12.3	132.11	1214	1214	0	75.784	By MS/MS	By MS/MS	By MS/MS	By MS/MS	By MS/MS	By MS/MS	12.3	9.1	9	10	5.8	10	2468600	931080
Cre08.g375050.t1.2	Cre08.g375050.t1.2	2	2	2	Cre08.g375050.t1.2 pacid=30773987 gene-symbol=FAP86 definition=Flagellar Associated Protein 86 annot-version=v5.5	1	2	2	2	2	1	1	0	0	0	2	1	1	0	0	0	2	1	1	0	0	0	13.9	13.9	13.9	30.34	287	287	0	12.185	By MS/MS	By MS/MS	By matching				13.9	6.3	6.3	0	0	0	98238	70563
Cre08.g375084.t2.1;Cre08.g375084.t1.1	Cre08.g375084.t2.1;Cre08.g375084.t1.1	2;2	2;2	2;2	Cre08.g375084.t2.1 pacid=30773872 annot-version=v5.5;Cre08.g375084.t1.1 pacid=30773871 annot-version=v5.5	2	2	2	2	2	2	2	1	2	2	2	2	2	1	2	2	2	2	2	1	2	2	3.9	3.9	3.9	78.128	735	735;761	0	14.247	By MS/MS	By MS/MS	By MS/MS	By MS/MS	By MS/MS	By MS/MS	3.9	3.9	3.9	1.9	3.9	3.9	367390	147650
Cre08.g375850.t1.2	Cre08.g375850.t1.2	4	4	4	Cre08.g375850.t1.2 pacid=30773776 annot-version=v5.5	1	4	4	4	4	2	3	3	2	3	4	2	3	3	2	3	4	2	3	3	2	3	20.9	20.9	20.9	29.161	277	277	0	23.992	By MS/MS	By MS/MS	By MS/MS	By MS/MS	By matching	By MS/MS	20.9	9.7	13	17.7	14.1	13	721940	276690
Cre08.g378150.t1.1	Cre08.g378150.t1.1	3	3	3	Cre08.g378150.t1.1 pacid=30773353 gene-symbol=GLD2 definition=Glucose-6-phosphate dehydrogenase annot-version=v5.5	1	3	3	3	2	2	2	0	0	1	2	2	2	0	0	1	2	2	2	0	0	1	5.4	5.4	5.4	66.41	598	598	0	17.455	By MS/MS	By MS/MS	By MS/MS			By matching	3.7	3.7	3.5	0	0	1.8	101860	33690
Cre08.g378850.t1.2	Cre08.g378850.t1.2	6	6	6	Cre08.g378850.t1.2 pacid=30773952 gene-symbol=RPPK1 definition=Ribose-phosphate pyrophosphokinase annot-version=v5.5	1	6	6	6	6	6	4	3	1	2	6	6	4	3	1	2	6	6	4	3	1	2	20	20	20	44.278	416	416	0	55.346	By MS/MS	By MS/MS	By MS/MS	By MS/MS	By MS/MS	By MS/MS	20	20	16.6	12	4.3	9.1	1864900	878550
Cre08.g382150.t1.1	Cre08.g382150.t1.1	5	5	5	Cre08.g382150.t1.1 pacid=30774123 annot-version=v5.5	1	5	5	5	5	5	4	1	2	1	5	5	4	1	2	1	5	5	4	1	2	1	4.5	4.5	4.5	160.45	1571	1571	0	35.997	By MS/MS	By MS/MS	By MS/MS	By MS/MS	By MS/MS	By matching	4.5	4.5	3.2	0.8	1.8	0.8	451400	169440
Cre08.g382500.t1.2	Cre08.g382500.t1.2	5	5	5	Cre08.g382500.t1.2 pacid=30773860 gene-symbol=RPS25 definition=Cytosolic 80S ribosomal protein S25 annot-version=v5.5	1	5	5	5	5	5	5	5	4	4	5	5	5	5	4	4	5	5	5	5	4	4	32.7	32.7	32.7	11.818	107	107	0	35.069	By MS/MS	By MS/MS	By MS/MS	By MS/MS	By MS/MS	By MS/MS	32.7	32.7	32.7	32.7	32.7	32.7	2767000	870360
Cre08.g386000.t2.1;Cre08.g386000.t1.1	Cre08.g386000.t2.1;Cre08.g386000.t1.1	2;2	2;2	2;2	Cre08.g386000.t2.1 pacid=30773732 annot-version=v5.5;Cre08.g386000.t1.1 pacid=30773731 annot-version=v5.5	2	2	2	2	2	2	0	0	2	2	2	2	0	0	2	2	2	2	0	0	2	2	1.9	1.9	1.9	299.06	2949	2949;2950	0.0021231	10.781	By MS/MS	By matching			By MS/MS	By matching	1.9	1.9	0	0	1.9	1.9	175380	68096
Cre09.g386650.t2.1;Cre09.g386650.t1.2	Cre09.g386650.t2.1;Cre09.g386650.t1.2	9;9	9;9	9;9	Cre09.g386650.t2.1 pacid=30781166 gene-symbol=ANT1 definition=ADP/ATP carrier protein, mitochondrial annot-version=v5.5;Cre09.g386650.t1.2 pacid=30781165 gene-symbol=ANT1 definition=ADP/ATP carrier protein, mitochondrial annot-version=v5.5	2	9	9	9	7	9	6	9	4	7	7	9	6	9	4	7	7	9	6	9	4	7	27.9	27.9	27.9	33.527	308	308;308	0	68.929	By MS/MS	By MS/MS	By MS/MS	By MS/MS	By MS/MS	By MS/MS	26.3	27.9	15.3	27.9	18.8	16.9	3372000	758000
Cre09.g386735.t1.1	Cre09.g386735.t1.1	2	2	2	Cre09.g386735.t1.1 pacid=30780264 gene-symbol=DLA1 definition=Dihydrolipoamide acetyltransferase annot-version=v5.5	1	2	2	2	1	1	1	2	1	1	1	1	1	2	1	1	1	1	1	2	1	1	10	10	10	63.852	623	623	0	15.295	By MS/MS	By MS/MS	By MS/MS	By MS/MS	By MS/MS	By MS/MS	3.7	3.7	3.7	10	3.7	3.7	273740	32377
Cre09.g388200.t1.1	Cre09.g388200.t1.1	4	4	4	Cre09.g388200.t1.1 pacid=30781020 gene-symbol=RPL10 definition=Cytosolic 80S ribosomal protein L10 annot-version=v5.5	1	4	4	4	4	3	4	4	3	2	4	3	4	4	3	2	4	3	4	4	3	2	21.3	21.3	21.3	26.237	230	230	0	27.263	By MS/MS	By MS/MS	By MS/MS	By MS/MS	By MS/MS	By MS/MS	21.3	14.8	21.3	21.3	16.1	11.3	1501900	541730
Cre09.g388726.t1.1;Cre09.g388726.t4.1;Cre09.g388726.t3.1;Cre09.g388726.t2.1	Cre09.g388726.t1.1;Cre09.g388726.t4.1	5;4;1;1	5;4;1;1	5;4;1;1	Cre09.g388726.t1.1 pacid=30780223 annot-version=v5.5;Cre09.g388726.t4.1 pacid=30780226 annot-version=v5.5	4	5	5	5	5	4	2	3	5	5	5	4	2	3	5	5	5	4	2	3	5	5	17.3	17.3	17.3	39.948	370	370;123;242;258	0	35.087	By MS/MS	By MS/MS	By matching	By MS/MS	By MS/MS	By MS/MS	17.3	10.8	9.5	8.1	17.3	17.3	1218000	421030
Cre09.g389550.t1.1	Cre09.g389550.t1.1	7	7	7	Cre09.g389550.t1.1 pacid=30780736 gene-symbol=DNJ13 definition=DnaJ-like protein annot-version=v5.5	1	7	7	7	7	6	7	5	5	5	7	6	7	5	5	5	7	6	7	5	5	5	15.7	15.7	15.7	44.522	421	421	0	52.36	By MS/MS	By MS/MS	By MS/MS	By MS/MS	By MS/MS	By MS/MS	15.7	15.7	15.7	15.2	15.7	9.3	2655300	983160
Cre09.g389652.t1.1	Cre09.g389652.t1.1	2	2	2	Cre09.g389652.t1.1 pacid=30780205 annot-version=v5.5	1	2	2	2	2	1	1	0	0	0	2	1	1	0	0	0	2	1	1	0	0	0	8.8	8.8	8.8	45.137	397	397	0	12.702	By MS/MS	By MS/MS	By MS/MS				8.8	5.8	5.8	0	0	0	100890	51052
Cre09.g390450.t1.2	Cre09.g390450.t1.2	3	3	3	Cre09.g390450.t1.2 pacid=30780476 annot-version=v5.5	1	3	3	3	3	2	3	2	2	1	3	2	3	2	2	1	3	2	3	2	2	1	5.1	5.1	5.1	82.51	819	819	0	18.813	By MS/MS	By MS/MS	By MS/MS	By MS/MS	By matching	By matching	5.1	3.9	5.1	2.6	3.8	1.2	308420	127580
Cre09.g391097.t2.1;Cre09.g391097.t1.1	Cre09.g391097.t2.1;Cre09.g391097.t1.1	3;3	3;3	3;3	Cre09.g391097.t2.1 pacid=30781302 gene-symbol=RPL24 definition=Cytosolic 80S ribosomal protein L4 annot-version=v5.5;Cre09.g391097.t1.1 pacid=30781301 gene-symbol=RPL24 definition=Cytosolic 80S ribosomal protein L4 annot-version=v5.5	2	3	3	3	3	2	2	2	2	3	3	2	2	2	2	3	3	2	2	2	2	3	14.1	14.1	14.1	17.036	149	149;173	0	19.787	By MS/MS	By MS/MS	By MS/MS	By MS/MS	By MS/MS	By MS/MS	14.1	14.1	8.7	8.7	8.7	14.1	1097300	383480
Cre09.g391652.t1.1	Cre09.g391652.t1.1	5	5	5	Cre09.g391652.t1.1 pacid=30780641 annot-version=v5.5	1	5	5	5	3	4	4	2	1	3	3	4	4	2	1	3	3	4	4	2	1	3	6.2	6.2	6.2	111.15	1044	1044	0	31.878	By MS/MS	By MS/MS	By MS/MS	By matching	By matching	By MS/MS	3.6	5.3	5.5	2.8	1.6	4.5	404540	106480
Cre09.g392350.t2.1;Cre09.g392350.t1.2	Cre09.g392350.t2.1;Cre09.g392350.t1.2	6;6	6;6	6;6	Cre09.g392350.t2.1 pacid=30780382 gene-symbol=CGLD37 definition=glycine-rich RNA-binding protein annot-version=v5.5;Cre09.g392350.t1.2 pacid=30780381 gene-symbol=CGLD37 definition=glycine-rich RNA-binding protein annot-version=v5.5	2	6	6	6	4	6	5	3	5	4	4	6	5	3	5	4	4	6	5	3	5	4	39.4	39.4	39.4	15.784	165	165;170	0	41.869	By MS/MS	By MS/MS	By MS/MS	By MS/MS	By MS/MS	By MS/MS	30.9	39.4	39.4	24.8	39.4	32.7	2971500	1024800
Cre09.g392800.t1.1	Cre09.g392800.t1.1	4	4	4	Cre09.g392800.t1.1 pacid=30780477 annot-version=v5.5	1	4	4	4	3	3	2	4	1	1	3	3	2	4	1	1	3	3	2	4	1	1	6.5	6.5	6.5	95.018	962	962	0	38.315	By MS/MS	By MS/MS	By MS/MS	By MS/MS	By MS/MS	By matching	5.4	5.4	3.5	6.5	1.1	2.1	736900	270480
Cre09.g393728.t1.1	Cre09.g393728.t1.1	2	2	2	Cre09.g393728.t1.1 pacid=30781271 annot-version=v5.5	1	2	2	2	2	2	2	1	1	1	2	2	2	1	1	1	2	2	2	1	1	1	3.8	3.8	3.8	74.661	710	710	0.0021786	11.336	By MS/MS	By MS/MS	By MS/MS	By matching	By matching	By MS/MS	3.8	3.8	3.8	2.4	2.4	1.4	151810	36540
Cre09.g394200.t1.1;Cre09.g393450.t1.1	Cre09.g394200.t1.1;Cre09.g393450.t1.1	5;3	5;3	5;3	Cre09.g394200.t1.1 pacid=30780796 gene-symbol=FAP102 definition=Flagellar Associated Protein 102 annot-version=v5.5;Cre09.g393450.t1.1 pacid=30781208 gene-symbol=FAP233 definition=Flagellar Associated Protein 233 annot-version=v5.5	2	5	5	5	5	4	1	4	4	4	5	4	1	4	4	4	5	4	1	4	4	4	5.4	5.4	5.4	156.48	1496	1496;1520	0	31.521	By MS/MS	By MS/MS	By MS/MS	By MS/MS	By MS/MS	By MS/MS	5.4	3.5	0.9	3.5	4.3	4.5	1048000	383390
Cre09.g394399.t1.1	Cre09.g394399.t1.1	5	5	5	Cre09.g394399.t1.1 pacid=30780529 annot-version=v5.5	1	5	5	5	4	2	3	4	3	3	4	2	3	4	3	3	4	2	3	4	3	3	9.2	9.2	9.2	84.445	792	792	0	35.967	By MS/MS	By MS/MS	By MS/MS	By MS/MS	By MS/MS	By MS/MS	9.1	4	5.8	5.8	5.8	5.8	960090	288420
Cre09.g394510.t1.1	Cre09.g394510.t1.1	12	12	12	Cre09.g394510.t1.1 pacid=30780295 annot-version=v5.5	1	12	12	12	10	10	6	9	11	7	10	10	6	9	11	7	10	10	6	9	11	7	22.5	22.5	22.5	62.96	600	600	0	113.12	By MS/MS	By MS/MS	By MS/MS	By MS/MS	By MS/MS	By MS/MS	20.5	22.5	13.5	16	19.7	14.5	3798700	1515600
Cre09.g394621.t2.1;Cre09.g394621.t1.1	Cre09.g394621.t2.1;Cre09.g394621.t1.1	7;7	7;7	7;7	Cre09.g394621.t2.1 pacid=30780748 annot-version=v5.5;Cre09.g394621.t1.1 pacid=30780747 annot-version=v5.5	2	7	7	7	7	4	2	1	3	2	7	4	2	1	3	2	7	4	2	1	3	2	5.4	5.4	5.4	183.42	1748	1748;1816	0	48.746	By MS/MS	By MS/MS	By MS/MS	By matching	By MS/MS	By matching	5.4	3	1.4	0.7	1.9	1.2	547040	288790
Cre09.g395325.t1.1	Cre09.g395325.t1.1	2	2	2	Cre09.g395325.t1.1 pacid=30780525 annot-version=v5.5	1	2	2	2	2	2	2	2	1	2	2	2	2	2	1	2	2	2	2	2	1	2	16.7	16.7	16.7	17.342	168	168	0	15.074	By MS/MS	By MS/MS	By matching	By matching	By MS/MS	By MS/MS	16.7	16.7	16.7	16.7	9.5	16.7	345130	90671
Cre09.g396213.t1.1	Cre09.g396213.t1.1	4	4	4	Cre09.g396213.t1.1 pacid=30780284 gene-symbol=PSBO definition=Photosystem II Oxygen Evolution Enhancer protein 1 annot-version=v5.5	1	4	4	4	3	3	4	3	2	1	3	3	4	3	2	1	3	3	4	3	2	1	20.6	20.6	20.6	30.579	291	291	0	31.124	By MS/MS	By MS/MS	By MS/MS	By MS/MS	By MS/MS	By matching	16.2	16.2	20.6	17.2	13.4	3.4	1779100	423860
Cre09.g397697.t1.1	Cre09.g397697.t1.1	16	16	16	Cre09.g397697.t1.1 pacid=30781440 gene-symbol=RPL4 definition=Ribosomal protein L4 annot-version=v5.5	1	16	16	16	16	14	13	15	14	15	16	14	13	15	14	15	16	14	13	15	14	15	47.3	47.3	47.3	44.91	410	410	0	206.42	By MS/MS	By MS/MS	By MS/MS	By MS/MS	By MS/MS	By MS/MS	47.3	41	36.3	41	45.4	43.9	11731000	3900300
Cre09.g398650.t1.2	Cre09.g398650.t1.2	3	3	3	Cre09.g398650.t1.2 pacid=30780362 annot-version=v5.5	1	3	3	3	2	3	3	0	0	2	2	3	3	0	0	2	2	3	3	0	0	2	6.1	6.1	6.1	87.735	797	797	0	18.045	By MS/MS	By MS/MS	By MS/MS			By MS/MS	3.8	6.1	6.1	0	0	3.5	215250	77222
Cre09.g400000.t1.1	Cre09.g400000.t1.1	6	6	6	Cre09.g400000.t1.1 pacid=30780956 annot-version=v5.5	1	6	6	6	6	4	5	4	3	5	6	4	5	4	3	5	6	4	5	4	3	5	5.1	5.1	5.1	171.2	1704	1704	0	60.305	By MS/MS	By MS/MS	By MS/MS	By MS/MS	By MS/MS	By MS/MS	5.1	3.5	4.3	4.3	2.7	4.3	1423000	559710
Cre09.g400367.t1.1	Cre09.g400367.t1.1	2	2	2	Cre09.g400367.t1.1 pacid=30780907 definition=RNA terminal 3 phosphate cyclase annot-version=v5.5	1	2	2	2	1	1	1	0	1	1	1	1	1	0	1	1	1	1	1	0	1	1	7	7	7	39.551	370	370	0	14.15	By MS/MS	By matching	By MS/MS		By matching	By matching	4.1	3	3	0	3	4.1	181910	60541
Cre09.g400650.t1.2	Cre09.g400650.t1.2	8	8	8	Cre09.g400650.t1.2 pacid=30780656 gene-symbol=RPS6 definition=Cytosolic 80S ribosomal protein S6 annot-version=v5.5	1	8	8	8	7	8	4	6	6	8	7	8	4	6	6	8	7	8	4	6	6	8	35.1	35.1	35.1	28.435	248	248	0	63.83	By MS/MS	By MS/MS	By MS/MS	By MS/MS	By MS/MS	By MS/MS	34.3	35.1	19	30.6	29	35.1	2403200	676650
Cre09.g401600.t1.2	Cre09.g401600.t1.2	4	4	4	Cre09.g401600.t1.2 pacid=30780672 annot-version=v5.5	1	4	4	4	3	4	4	4	4	3	3	4	4	4	4	3	3	4	4	4	4	3	37.8	37.8	37.8	15.124	143	143	0	29.755	By MS/MS	By MS/MS	By MS/MS	By MS/MS	By MS/MS	By MS/MS	37.8	37.8	37.8	37.8	37.8	33.6	1743400	312140
Cre09.g401663.t1.1	Cre09.g401663.t1.1	4	4	4	Cre09.g401663.t1.1 pacid=30781249 annot-version=v5.5	1	4	4	4	4	3	3	3	2	4	4	3	3	3	2	4	4	3	3	3	2	4	15.1	15.1	15.1	41.286	371	371	0	23.043	By MS/MS	By MS/MS	By MS/MS	By matching	By MS/MS	By MS/MS	15.1	10	10	10	7	15.1	527670	186260
Cre09.g401923.t1.1	Cre09.g401923.t1.1	8	8	8	Cre09.g401923.t1.1 pacid=30781109 annot-version=v5.5	1	8	8	8	8	8	6	3	7	5	8	8	6	3	7	5	8	8	6	3	7	5	18.4	18.4	18.4	78.047	757	757	0	71.181	By MS/MS	By MS/MS	By MS/MS	By MS/MS	By MS/MS	By MS/MS	18.4	18.4	14.1	6.5	16	11.4	1451900	535180
Cre09.g404400.t1.2	Cre09.g404400.t1.2	4	4	4	Cre09.g404400.t1.2 pacid=30780623 definition=Sin3 complex component annot-version=v5.5	1	4	4	4	4	4	3	3	1	2	4	4	3	3	1	2	4	4	3	3	1	2	23	23	23	18.364	165	165	0	24.621	By MS/MS	By MS/MS	By MS/MS	By MS/MS	By matching	By MS/MS	23	23	22.4	18.8	12.1	18.8	869120	335190
Cre09.g407700.t1.2	Cre09.g407700.t1.2	2	2	2	Cre09.g407700.t1.2 pacid=30781442 gene-symbol=CEP1 definition=Cysteine endopeptidase annot-version=v5.5	1	2	2	2	2	1	2	2	2	1	2	1	2	2	2	1	2	1	2	2	2	1	6.8	6.8	6.8	53.919	501	501	0	12.856	By MS/MS	By MS/MS	By matching	By MS/MS	By MS/MS	By matching	6.8	4	6.8	6.8	6.8	2.8	401360	99028
Cre09.g408200.t1.2	Cre09.g408200.t1.2	3	3	3	Cre09.g408200.t1.2 pacid=30780392 gene-symbol=SRS4 definition=Serine/arginine-rich pre-mRNA splicing factor annot-version=v5.5	1	3	3	3	3	2	1	1	1	1	3	2	1	1	1	1	3	2	1	1	1	1	27	27	27	22.101	200	200	0	19.093	By MS/MS	By MS/MS	By MS/MS	By matching	By matching	By matching	27	16.5	6	10.5	10.5	10.5	404300	289720
Cre09.g409200.t1.2	Cre09.g409200.t1.2	6	6	6	Cre09.g409200.t1.2 pacid=30781511 definition=putative RNA-binding protein annot-version=v5.5	1	6	6	6	6	5	5	4	5	3	6	5	5	4	5	3	6	5	5	4	5	3	7.9	7.9	7.9	80.44	721	721	0	38.701	By MS/MS	By MS/MS	By MS/MS	By MS/MS	By MS/MS	By matching	7.9	5.7	5.7	6.4	6.4	4	1574700	578990
Cre09.g409500.t1.2	Cre09.g409500.t1.2	3	3	3	Cre09.g409500.t1.2 pacid=30781555 annot-version=v5.5	1	3	3	3	3	2	3	1	2	2	3	2	3	1	2	2	3	2	3	1	2	2	12.7	12.7	12.7	32.534	332	332	0	28.581	By MS/MS	By MS/MS	By MS/MS	By MS/MS	By MS/MS	By MS/MS	12.7	11.4	12.7	3.9	11.4	8.7	1124200	291050
Cre09.g410700.t1.2	Cre09.g410700.t1.2	2	2	2	Cre09.g410700.t1.2 pacid=30781064 gene-symbol=MDN5 definition=NADP-Malate Dehydrogenase annot-version=v5.5	1	2	2	2	2	1	2	0	0	1	2	1	2	0	0	1	2	1	2	0	0	1	10.1	10.1	10.1	44.852	415	415	0	15.945	By MS/MS	By matching	By MS/MS			By matching	10.1	6.3	10.1	0	0	3.9	109310	66108
Cre09.g411900.t1.1	Cre09.g411900.t1.1	2	2	2	Cre09.g411900.t1.1 pacid=30781084 gene-symbol=SHMT3 definition=Serine hydroxymethyltransferase annot-version=v5.5	1	2	2	2	2	1	0	0	0	0	2	1	0	0	0	0	2	1	0	0	0	0	5.5	5.5	5.5	52.743	487	487	0.0021505	11.115	By MS/MS	By matching					5.5	3.3	0	0	0	0	48430	36283
Cre09.g412100.t1.2	Cre09.g412100.t1.2	6	6	6	Cre09.g412100.t1.2 pacid=30780717 gene-symbol=PSAF definition=Photosystem I reaction center subunit III annot-version=v5.5	1	6	6	6	4	5	4	6	5	3	4	5	4	6	5	3	4	5	4	6	5	3	33	33	33	24.057	227	227	0	53.445	By MS/MS	By MS/MS	By MS/MS	By MS/MS	By MS/MS	By MS/MS	22.9	30.8	22.9	33	25.1	22.9	5440800	1506700
Cre09.g415600.t2.1;Cre09.g415600.t1.1	Cre09.g415600.t2.1;Cre09.g415600.t1.1	2;2	2;2	2;2	Cre09.g415600.t2.1 pacid=30781241 annot-version=v5.5;Cre09.g415600.t1.1 pacid=30781240 annot-version=v5.5	2	2	2	2	1	0	2	1	2	2	1	0	2	1	2	2	1	0	2	1	2	2	4.5	4.5	4.5	47.349	443	443;443	0	12.924	By MS/MS		By MS/MS	By MS/MS	By MS/MS	By MS/MS	2.7	0	4.5	2.7	4.5	4.5	305130	66083
Cre09.g415950.t1.2	Cre09.g415950.t1.2	2	2	2	Cre09.g415950.t1.2 pacid=30781212 gene-symbol=PRPL6 definition=Chloroplast ribosomal protein L6 annot-version=v5.5	1	2	2	2	1	2	1	1	0	0	1	2	1	1	0	0	1	2	1	1	0	0	13	13	13	22.235	207	207	0	11.798	By MS/MS	By MS/MS	By matching	By MS/MS			8.7	13	8.7	4.3	0	0	221010	119480
Cre09.g416000.t1.2	Cre09.g416000.t1.2	3	3	3	Cre09.g416000.t1.2 pacid=30780734 definition=Pre-mRNA processing factor 3-like protein annot-version=v5.5	1	3	3	3	2	2	0	1	1	1	2	2	0	1	1	1	2	2	0	1	1	1	9.6	9.6	9.6	77.877	758	758	0	16.286	By MS/MS	By MS/MS		By MS/MS	By MS/MS	By MS/MS	6.5	5.7	0	4	4	4	196190	82860
Cre09.g416850.t1.2	Cre09.g416850.t1.2	6	6	6	Cre09.g416850.t1.2 pacid=30780459 annot-version=v5.5	1	6	6	6	6	5	4	5	4	5	6	5	4	5	4	5	6	5	4	5	4	5	4.6	4.6	4.6	165.19	1690	1690	0	44.165	By MS/MS	By MS/MS	By MS/MS	By MS/MS	By MS/MS	By MS/MS	4.6	4.6	4	4	3.7	4.6	1043800	396870
Cre10.g417700.t1.2	Cre10.g417700.t1.2	5	5	5	Cre10.g417700.t1.2 pacid=30789966 gene-symbol=RPL3 definition=Cytosolic 80S ribosomal protein L3 annot-version=v5.5	1	5	5	5	4	4	3	4	4	4	4	4	3	4	4	4	4	4	3	4	4	4	13.2	13.2	13.2	43.508	386	386	0	34.495	By MS/MS	By MS/MS	By MS/MS	By MS/MS	By MS/MS	By MS/MS	9.8	9.8	6.7	10.9	9.8	9.8	3234800	848480
Cre10.g417950.t1.2	Cre10.g417950.t1.2	4	4	4	Cre10.g417950.t1.2 pacid=30790890 annot-version=v5.5	1	4	4	4	3	3	4	2	3	3	3	3	4	2	3	3	3	3	4	2	3	3	5.7	5.7	5.7	86.852	794	794	0	26.712	By MS/MS	By MS/MS	By MS/MS	By MS/MS	By MS/MS	By MS/MS	4.2	4.2	5.7	2.6	3.9	4.5	923650	235980
Cre10.g418250.t1.2	Cre10.g418250.t1.2	7	7	7	Cre10.g418250.t1.2 pacid=30790235 gene-symbol=BLD10 definition=Basal body protein annot-version=v5.5	1	7	7	7	4	5	0	1	4	3	4	5	0	1	4	3	4	5	0	1	4	3	6.4	6.4	6.4	174.64	1640	1640	0	43.925	By MS/MS	By MS/MS		By matching	By MS/MS	By matching	4	3.9	0	0.8	4.1	2.4	424830	160360
Cre10.g420750.t1.2	Cre10.g420750.t1.2	3	3	3	Cre10.g420750.t1.2 pacid=30790763 gene-symbol=RPL30 definition=Cytosolic 80S ribosomal protein L30 annot-version=v5.5	1	3	3	3	3	3	3	2	2	3	3	3	3	2	2	3	3	3	3	2	2	3	28.2	28.2	28.2	12.001	110	110	0	47.974	By MS/MS	By MS/MS	By MS/MS	By MS/MS	By MS/MS	By MS/MS	28.2	28.2	28.2	25.5	28.2	28.2	2296500	762260
Cre10.g420900.t1.2	Cre10.g420900.t1.2	6	6	6	Cre10.g420900.t1.2 pacid=30790232 gene-symbol=HEL44 definition=DEAD/DEAH box helicase annot-version=v5.5	1	6	6	6	5	5	5	4	5	6	5	5	5	4	5	6	5	5	5	4	5	6	8.1	8.1	8.1	98.864	929	929	0	39.872	By MS/MS	By MS/MS	By MS/MS	By MS/MS	By MS/MS	By MS/MS	6.7	7.2	7.2	6.4	6.2	8.1	1358100	415690
Cre10.g427150.t1.2	Cre10.g427150.t1.2	7	7	7	Cre10.g427150.t1.2 pacid=30789885 definition=Pre-mRNA splicing factor annot-version=v5.5	1	7	7	7	7	4	4	2	2	3	7	4	4	2	2	3	7	4	4	2	2	3	22.5	22.5	22.5	31.236	276	276	0	42.824	By MS/MS	By MS/MS	By MS/MS	By MS/MS	By MS/MS	By MS/MS	22.5	17	14.5	8	8	13.8	820470	384580
Cre10.g427300.t1.2	Cre10.g427300.t1.2	2	2	2	Cre10.g427300.t1.2 pacid=30790713 gene-symbol=RSP2 definition=Radial Spoke Protein 2 annot-version=v5.5	1	2	2	2	2	2	2	0	0	0	2	2	2	0	0	0	2	2	2	0	0	0	4.3	4.3	4.3	77.362	738	738	0	18.534	By MS/MS	By MS/MS	By MS/MS				4.3	4.3	4.3	0	0	0	371740	220950
Cre10.g427700.t1.2	Cre10.g427700.t1.2	7	7	7	Cre10.g427700.t1.2 pacid=30790252 gene-symbol=HEL47 definition=DEAD box ATP-dependent RNA helicase annot-version=v5.5	1	7	7	7	5	4	5	4	2	2	5	4	5	4	2	2	5	4	5	4	2	2	14.7	14.7	14.7	67.315	646	646	0	53.868	By MS/MS	By MS/MS	By MS/MS	By MS/MS	By MS/MS	By MS/MS	8.8	7.7	9.4	9.6	3.6	4.2	797470	305470
Cre10.g428050.t1.1	Cre10.g428050.t1.1	2	2	2	Cre10.g428050.t1.1 pacid=30790590 annot-version=v5.5	1	2	2	2	1	1	1	0	2	2	1	1	1	0	2	2	1	1	1	0	2	2	3.6	3.6	3.6	120.37	1144	1144	0.0021834	11.374	By MS/MS	By MS/MS	By MS/MS		By MS/MS	By MS/MS	1.5	1.5	1.5	0	3.6	3.6	147330	22493
Cre10.g428750.t1.1	Cre10.g428750.t1.1	7	7	7	Cre10.g428750.t1.1 pacid=30790321 annot-version=v5.5	1	7	7	7	7	6	4	6	4	7	7	6	4	6	4	7	7	6	4	6	4	7	4.7	4.7	4.7	224.33	2183	2183	0	46.713	By MS/MS	By MS/MS	By MS/MS	By MS/MS	By MS/MS	By MS/MS	4.7	4.2	2.3	4.2	2.9	4.7	1009000	315000
Cre10.g429350.t1.2	Cre10.g429350.t1.2	2	2	2	Cre10.g429350.t1.2 pacid=30789956 annot-version=v5.5	1	2	2	2	1	1	1	1	1	1	1	1	1	1	1	1	1	1	1	1	1	1	3.4	3.4	3.4	79.825	773	773	0.0021739	11.323	By matching	By matching	By matching	By matching	By MS/MS	By MS/MS	1.7	1.7	1.7	1.7	1.7	1.7	84791	20996
Cre10.g432800.t1.2	Cre10.g432800.t1.2	2	2	2	Cre10.g432800.t1.2 pacid=30790737 gene-symbol=RPSA definition=Cytosolic 80S ribosomal protein Sa annot-version=v5.5	1	2	2	2	1	1	1	0	0	0	1	1	1	0	0	0	1	1	1	0	0	0	10.8	10.8	10.8	30.706	279	279	0	12.971	By MS/MS	By MS/MS	By matching				7.9	2.9	2.9	0	0	0	68447	24431
Cre10.g435800.t1.2	Cre10.g435800.t1.2	15	15	15	Cre10.g435800.t1.2 pacid=30790383 gene-symbol=CSP41B definition=Chloroplast stem-loop-binding protein 41b annot-version=v5.5	1	15	15	15	14	14	11	10	13	14	14	14	11	10	13	14	14	14	11	10	13	14	37.9	37.9	37.9	44.738	401	401	0	113.9	By MS/MS	By MS/MS	By MS/MS	By MS/MS	By MS/MS	By MS/MS	37.9	30.7	27.2	23.2	35.9	37.9	6571000	1588700
Cre10.g436550.t1.2	Cre10.g436550.t1.2	11	11	11	Cre10.g436550.t1.2 pacid=30790090 gene-symbol=LCI5 definition=Low-CO2-inducible protein 5 annot-version=v5.5	1	11	11	11	11	11	10	6	8	8	11	11	10	6	8	8	11	11	10	6	8	8	65.3	65.3	65.3	32.314	317	317	0	99.642	By MS/MS	By MS/MS	By MS/MS	By MS/MS	By MS/MS	By MS/MS	65.3	65.3	65.3	46.1	59.9	53	8406600	2653800
Cre10.g438700.t1.1	Cre10.g438700.t1.1	3	3	3	Cre10.g438700.t1.1 pacid=30790009 annot-version=v5.5	1	3	3	3	2	3	3	2	1	3	2	3	3	2	1	3	2	3	3	2	1	3	3.9	3.9	3.9	101.81	963	963	0	20.612	By MS/MS	By MS/MS	By MS/MS	By MS/MS	By matching	By MS/MS	2.9	3.9	3.9	2.4	1.3	3.9	446310	151280
Cre10.g439700.t1.2	Cre10.g439700.t1.2	4	4	4	Cre10.g439700.t1.2 pacid=30789817 gene-symbol=CGL28 definition=conserved expressed putative RNA binding protein annot-version=v5.5	1	4	4	4	3	3	4	4	2	3	3	3	4	4	2	3	3	3	4	4	2	3	9.3	9.3	9.3	49.324	464	464	0	27.498	By MS/MS	By MS/MS	By MS/MS	By matching	By MS/MS	By MS/MS	7.1	8.2	9.3	9.3	5.4	6	395930	127370
Cre10.g440050.t1.2	Cre10.g440050.t1.2	17	17	17	Cre10.g440050.t1.2 pacid=30790885 gene-symbol=CSP41A definition=Chloroplast stem-loop-binding protein 41a annot-version=v5.5	1	17	17	17	14	13	10	12	16	15	14	13	10	12	16	15	14	13	10	12	16	15	43.1	43.1	43.1	47.99	439	439	0	146.38	By MS/MS	By MS/MS	By MS/MS	By MS/MS	By MS/MS	By MS/MS	32.6	31.2	27.1	28.5	35.5	41.5	6143000	1379500
Cre10.g441400.t1.2	Cre10.g441400.t1.2	14	14	14	Cre10.g441400.t1.2 pacid=30790401 gene-symbol=NOP58 definition=Nucleolar protein, Component of C/D snoRNPs annot-version=v5.5	1	14	14	14	14	14	12	13	10	12	14	14	12	13	10	12	14	14	12	13	10	12	27	27	27	55.472	508	508	0	151.2	By MS/MS	By MS/MS	By MS/MS	By MS/MS	By MS/MS	By MS/MS	27	27	22.4	22.4	16.1	18.7	10001000	2715900
Cre10.g441450.t1.2	Cre10.g441450.t1.2	4	4	4	Cre10.g441450.t1.2 pacid=30790157 annot-version=v5.5	1	4	4	4	3	1	2	2	0	3	3	1	2	2	0	3	3	1	2	2	0	3	8.5	8.5	8.5	97.164	875	875	0	25.725	By MS/MS	By MS/MS	By matching	By MS/MS		By MS/MS	7	2.1	3.7	3.7	0	5.1	254950	139390
Cre10.g442000.t1.2	Cre10.g442000.t1.2	10	10	10	Cre10.g442000.t1.2 pacid=30790656 annot-version=v5.5	1	10	10	10	8	6	9	6	5	7	8	6	9	6	5	7	8	6	9	6	5	7	17.9	17.9	17.9	72.947	671	671	0	73.949	By MS/MS	By MS/MS	By MS/MS	By MS/MS	By MS/MS	By MS/MS	14.5	10.9	16.8	12.8	11.5	14.5	1244200	461920
Cre10.g444450.t1.1	Cre10.g444450.t1.1	3	3	3	Cre10.g444450.t1.1 pacid=30790178 gene-symbol=SSA17 definition=cilia-sensing, structure and/or assembly annot-version=v5.5	1	3	3	3	1	3	0	1	2	3	1	3	0	1	2	3	1	3	0	1	2	3	2.3	2.3	2.3	153.13	1449	1449	0	18.474	By MS/MS	By MS/MS		By matching	By MS/MS	By MS/MS	0.7	2.3	0	0.7	1.4	2.3	168430	27971
Cre10.g445600.t1.1	Cre10.g445600.t1.1	8	8	8	Cre10.g445600.t1.1 pacid=30790575 annot-version=v5.5	1	8	8	8	7	7	7	4	3	6	7	7	7	4	3	6	7	7	7	4	3	6	7.5	7.5	7.5	151.18	1406	1406	0	51.771	By MS/MS	By MS/MS	By MS/MS	By MS/MS	By MS/MS	By MS/MS	6.5	6.1	6.4	3.1	2.7	5.3	1065200	319030
Cre10.g446900.t1.2	Cre10.g446900.t1.2	7	7	7	Cre10.g446900.t1.2 pacid=30789815 annot-version=v5.5	1	7	7	7	6	5	6	4	5	3	6	5	6	4	5	3	6	5	6	4	5	3	20.7	20.7	20.7	56.027	518	518	0	71.147	By MS/MS	By MS/MS	By MS/MS	By MS/MS	By MS/MS	By MS/MS	20.7	12	20.5	12.5	16.8	8.1	1126900	382490
Cre10.g450879.t1.2	Cre10.g450879.t1.2	2	2	2	Cre10.g450879.t1.2 pacid=30790091 annot-version=v5.5	1	2	2	2	2	2	2	2	2	2	2	2	2	2	2	2	2	2	2	2	2	2	2.5	2.5	2.5	58.82	554	554	0	14.016	By MS/MS	By MS/MS	By MS/MS	By matching	By matching	By MS/MS	2.5	2.5	2.5	2.5	2.5	2.5	455750	138540
Cre10.g452500.t1.2	Cre10.g452500.t1.2	7	7	7	Cre10.g452500.t1.2 pacid=30790311 annot-version=v5.5	1	7	7	7	6	5	4	4	5	6	6	5	4	4	5	6	6	5	4	4	5	6	10.4	10.4	10.4	112.42	1059	1059	0	48.183	By MS/MS	By MS/MS	By MS/MS	By MS/MS	By MS/MS	By MS/MS	9.3	5.9	4.9	4.8	6.6	7.7	1257100	450010
Cre10.g455600.t1.1	Cre10.g455600.t1.1	3	3	3	Cre10.g455600.t1.1 pacid=30789958 gene-symbol=ORC1 definition=Origin recognition complex subunit 1 annot-version=v5.5	1	3	3	3	3	2	2	2	2	2	3	2	2	2	2	2	3	2	2	2	2	2	4.5	4.5	4.5	101.08	959	959	0	19.98	By MS/MS	By MS/MS	By MS/MS	By matching	By matching	By MS/MS	4.5	3.5	3.5	2.3	2.3	2.3	411520	183150
Cre10.g455750.t1.1	Cre10.g455750.t1.1	3	3	3	Cre10.g455750.t1.1 pacid=30789805 definition=SNF2-related DNA/RNA helicase annot-version=v5.5	1	3	3	3	3	3	1	2	1	3	3	3	1	2	1	3	3	3	1	2	1	3	2.2	2.2	2.2	253.53	2539	2539	0	22.168	By MS/MS	By MS/MS	By matching	By MS/MS	By MS/MS	By MS/MS	2.2	2.2	0.4	1.3	0.9	2.2	294230	122240
Cre10.g459500.t1.1	Cre10.g459500.t1.1	3	3	3	Cre10.g459500.t1.1 pacid=30790293 gene-symbol=NGB1 definition=Nucleolar GTP-binding protein annot-version=v5.5	1	3	3	3	2	3	2	2	2	2	2	3	2	2	2	2	2	3	2	2	2	2	5.2	5.2	5.2	76.832	691	691	0	19.393	By MS/MS	By MS/MS	By MS/MS	By MS/MS	By MS/MS	By MS/MS	5.2	5.2	5.2	5.2	5.2	5.2	902220	283090
Cre10.g459600.t1.1	Cre10.g459600.t1.1	4	4	4	Cre10.g459600.t1.1 pacid=30790609 annot-version=v5.5	1	4	4	4	4	4	2	1	1	1	4	4	2	1	1	1	4	4	2	1	1	1	4.2	4.2	4.2	144.18	1374	1374	0	26.431	By MS/MS	By MS/MS	By matching	By MS/MS	By MS/MS	By MS/MS	4.2	4.2	2	1.2	1.2	1.2	312900	124630
Cre10.g461350.t1.1	Cre10.g461350.t1.1	15	15	15	Cre10.g461350.t1.1 pacid=30790438 gene-symbol=BUG23 definition=Basal body protein annot-version=v5.5	1	15	15	15	14	14	9	11	7	5	14	14	9	11	7	5	14	14	9	11	7	5	39.4	39.4	39.4	46.362	411	411	0	112.07	By MS/MS	By MS/MS	By MS/MS	By MS/MS	By MS/MS	By MS/MS	37	37	25.1	29.4	21.2	16.1	3793900	1636800
Cre10.g462250.t1.2	Cre10.g462250.t1.2	3	3	3	Cre10.g462250.t1.2 pacid=30789912 gene-symbol=REF1 definition=RNA Export Factor annot-version=v5.5	1	3	3	3	2	1	2	0	3	2	2	1	2	0	3	2	2	1	2	0	3	2	11.6	11.6	11.6	35.682	337	337	0	21.122	By MS/MS	By MS/MS	By MS/MS		By MS/MS	By MS/MS	6.8	4.2	6.8	0	11.6	6.8	637170	54859
Cre10.g465250.t1.2	Cre10.g465250.t1.2	2	2	2	Cre10.g465250.t1.2 pacid=30790682 gene-symbol=RSP11 definition=Radial Spoke Protein 11 annot-version=v5.5	1	2	2	2	2	2	2	0	0	0	2	2	2	0	0	0	2	2	2	0	0	0	19.6	19.6	19.6	21.489	204	204	0	12.467	By MS/MS	By MS/MS	By MS/MS				19.6	19.6	19.6	0	0	0	253450	134610
Cre10.g466250.t1.2	Cre10.g466250.t1.2	12	12	12	Cre10.g466250.t1.2 pacid=30790775 gene-symbol=PRP20 definition=Putative Utp21 subunit of U3 snoRNP annot-version=v5.5	1	12	12	12	9	9	9	6	4	8	9	9	9	6	4	8	9	9	9	6	4	8	20.6	20.6	20.6	112.89	1088	1088	0	85.758	By MS/MS	By MS/MS	By MS/MS	By MS/MS	By MS/MS	By MS/MS	15.2	13.3	14.6	10	6.8	13.1	2149800	700270
Cre10.g466650.t1.2	Cre10.g466650.t1.2	2	2	2	Cre10.g466650.t1.2 pacid=30789868 gene-symbol=FAP252 definition=Flagellar Associated Protein 252 annot-version=v5.5	1	2	2	2	2	1	1	1	0	0	2	1	1	1	0	0	2	1	1	1	0	0	10.2	10.2	10.2	39.463	352	352	0	18.85	By MS/MS	By MS/MS	By MS/MS	By matching			10.2	6	6	6	0	0	221280	129780
Cre11.g467500.t1.2	Cre11.g467500.t1.2	2	2	2	Cre11.g467500.t1.2 pacid=30775734 annot-version=v5.5	1	2	2	2	2	2	2	1	1	2	2	2	2	1	1	2	2	2	2	1	1	2	1.6	1.6	1.6	130.55	1274	1274	0	11.8	By matching	By MS/MS	By matching	By matching	By MS/MS	By MS/MS	1.6	1.6	1.6	0.8	0.9	1.6	183330	36239
Cre11.g467578.t1.1	Cre11.g467578.t1.1	5	5	5	Cre11.g467578.t1.1 pacid=30775702 annot-version=v5.5	1	5	5	5	4	4	4	4	4	2	4	4	4	4	4	2	4	4	4	4	4	2	44.4	44.4	44.4	13.503	126	126	0	35.268	By MS/MS	By MS/MS	By MS/MS	By MS/MS	By MS/MS	By MS/MS	31	44.4	31	33.3	44.4	19	910020	301280
Cre11.g467620.t1.1;Cre17.g704200.t1.1	Cre11.g467620.t1.1	9;1	9;1	9;1	Cre11.g467620.t1.1 pacid=30775861 annot-version=v5.5	2	9	9	9	8	9	6	6	3	5	8	9	6	6	3	5	8	9	6	6	3	5	13.4	13.4	13.4	82.376	766	766;195	0	71.002	By MS/MS	By MS/MS	By MS/MS	By MS/MS	By MS/MS	By MS/MS	11.5	13.4	9	9.3	5	8	1705700	644650
Cre11.g467757.t2.1;Cre11.g467757.t1.1	Cre11.g467757.t2.1;Cre11.g467757.t1.1	21;21	21;21	21;21	Cre11.g467757.t2.1 pacid=30775685 annot-version=v5.5;Cre11.g467757.t1.1 pacid=30775684 annot-version=v5.5	2	21	21	21	19	17	12	15	15	17	19	17	12	15	15	17	19	17	12	15	15	17	22.4	22.4	22.4	148.67	1548	1548;2943	0	193.13	By MS/MS	By MS/MS	By MS/MS	By MS/MS	By MS/MS	By MS/MS	22.3	20.7	13.7	18.3	17.5	18.8	7340800	2411900
Cre11.g467770.t1.1	Cre11.g467770.t1.1	4	4	4	Cre11.g467770.t1.1 pacid=30775977 gene-symbol=PGK1 definition=Phosphoglycerate kinase, chloroplast precursor annot-version=v5.5	1	4	4	4	3	3	4	1	2	0	3	3	4	1	2	0	3	3	4	1	2	0	13	13	13	49.031	462	462	0	35.094	By MS/MS	By MS/MS	By MS/MS	By matching	By MS/MS		12.8	12.8	13	5	9.1	0	478920	79491
Cre11.g468359.t1.1	Cre11.g468359.t1.1	4	4	4	Cre11.g468359.t1.1 pacid=30775490 gene-symbol=GAS31 definition=Pherophorin family protein annot-version=v5.5	1	4	4	4	3	2	4	2	2	1	3	2	4	2	2	1	3	2	4	2	2	1	8.4	8.4	8.4	71.562	704	704	0	27.821	By MS/MS	By matching	By MS/MS	By matching	By MS/MS	By matching	6.2	4.4	8.4	4.4	4.5	2.1	341440	58978
Cre11.g469600.t1.2	Cre11.g469600.t1.2	3	3	3	Cre11.g469600.t1.2 pacid=30775714 gene-symbol=HDA9 definition=Histone deacetylase annot-version=v5.5	1	3	3	3	3	3	3	3	2	3	3	3	3	3	2	3	3	3	3	3	2	3	5.3	5.3	5.3	93.851	883	883	0	23.373	By MS/MS	By MS/MS	By MS/MS	By MS/MS	By MS/MS	By MS/MS	5.3	5.3	5.3	5.3	3.4	5.3	729970	172320
Cre11.g476850.t1.2	Cre11.g476850.t1.2	4	4	4	Cre11.g476850.t1.2 pacid=30775673 gene-symbol=DRC4 definition=Nexin-dynein regulatory complex 4 annot-version=v5.5	1	4	4	4	3	4	1	3	0	2	3	4	1	3	0	2	3	4	1	3	0	2	11.9	11.9	11.9	55.107	471	471	0	26.267	By MS/MS	By MS/MS	By MS/MS	By MS/MS		By MS/MS	10.4	11.9	1.5	10.4	0	5.1	345320	157360
Cre11.g479500.t1.2	Cre11.g479500.t1.2	2	2	2	Cre11.g479500.t1.2 pacid=30775927 gene-symbol=PRPL4 definition=Chloroplast ribosomal protein L4 annot-version=v5.5	1	2	2	2	2	1	1	2	1	1	2	1	1	2	1	1	2	1	1	2	1	1	11.1	11.1	11.1	25.623	243	243	0	13.292	By MS/MS	By matching	By matching	By MS/MS	By MS/MS	By matching	11.1	4.1	4.1	11.1	4.1	7	184760	81125
Cre11.g480060.t1.2	Cre11.g480060.t1.2	2	2	2	Cre11.g480060.t1.2 pacid=30775535 annot-version=v5.5	1	2	2	2	2	1	1	1	1	1	2	1	1	1	1	1	2	1	1	1	1	1	9.8	9.8	9.8	56.729	579	579	0	12.551	By MS/MS	By MS/MS	By MS/MS	By MS/MS	By MS/MS	By MS/MS	9.8	4.8	5	5	5	5	237070	96019
Cre11.g480150.t1.2	Cre11.g480150.t1.2	7	7	7	Cre11.g480150.t1.2 pacid=30775525 gene-symbol=RPS14 definition=Cytosolic 80S ribosomal protein S14 annot-version=v5.5	1	7	7	7	7	6	6	6	6	5	7	6	6	6	6	5	7	6	6	6	6	5	35.3	35.3	35.3	16.302	153	153	0	51.333	By MS/MS	By MS/MS	By MS/MS	By MS/MS	By MS/MS	By MS/MS	35.3	28.8	28.8	28.8	28.8	18.3	2349900	729030
Cre11.g480950.t1.2	Cre11.g480950.t1.2	4	4	4	Cre11.g480950.t1.2 pacid=30775842 definition=High mobility group protein annot-version=v5.5	1	4	4	4	1	3	1	3	1	2	1	3	1	3	1	2	1	3	1	3	1	2	11.5	11.5	11.5	18.28	156	156	0	22.762	By matching	By MS/MS	By matching	By MS/MS	By MS/MS	By MS/MS	11.5	11.5	11.5	11.5	11.5	11.5	423520	54641
Cre11.g482450.t1.2	Cre11.g482450.t1.2	10	10	10	Cre11.g482450.t1.2 pacid=30775711 annot-version=v5.5	1	10	10	10	10	9	5	6	7	8	10	9	5	6	7	8	10	9	5	6	7	8	34.6	34.6	34.6	49.113	497	497	0	95.149	By MS/MS	By MS/MS	By MS/MS	By MS/MS	By MS/MS	By MS/MS	34.6	31	17.7	19.1	26.4	26	3330500	1326100
Cre11.g482700.t1.2	Cre11.g482700.t1.2	2	2	2	Cre11.g482700.t1.2 pacid=30775791 annot-version=v5.5	1	2	2	2	2	2	2	2	2	2	2	2	2	2	2	2	2	2	2	2	2	2	3.5	3.5	3.5	56.08	542	542	0	19.269	By MS/MS	By MS/MS	By MS/MS	By matching	By MS/MS	By MS/MS	3.5	3.5	3.5	3.5	3.5	3.5	554240	154650
Cre12.g484000.t1.2	Cre12.g484000.t1.2	2	2	2	Cre12.g484000.t1.2 pacid=30792400 gene-symbol=BCX1 definition=Acetyl-CoA carboxylase beta-carboxyltransferase subunit annot-version=v5.5	1	2	2	2	2	1	2	1	1	1	2	1	2	1	1	1	2	1	2	1	1	1	8.8	8.8	8.8	49.201	455	455	0	16.036	By MS/MS	By MS/MS	By MS/MS	By MS/MS	By MS/MS	By MS/MS	8.8	3.1	8.8	3.1	3.1	3.1	257540	134950
Cre12.g484050.t1.2	Cre12.g484050.t1.2	6	6	6	Cre12.g484050.t1.2 pacid=30792099 gene-symbol=RPL36 definition=Cytosolic 80S ribosomal protein L36 annot-version=v5.5	1	6	6	6	5	6	4	6	4	5	5	6	4	6	4	5	5	6	4	6	4	5	33.7	33.7	33.7	11.126	98	98	0	43.626	By MS/MS	By MS/MS	By MS/MS	By MS/MS	By MS/MS	By MS/MS	33.7	33.7	29.6	33.7	33.7	33.7	2577600	864030
Cre12.g486050.t1.2	Cre12.g486050.t1.2	3	3	3	Cre12.g486050.t1.2 pacid=30792310 annot-version=v5.5	1	3	3	3	3	2	2	2	2	2	3	2	2	2	2	2	3	2	2	2	2	2	13.8	13.8	13.8	18.322	160	160	0	17.188	By MS/MS	By MS/MS	By MS/MS	By MS/MS	By MS/MS	By MS/MS	13.8	13.8	13.8	13.8	13.8	13.8	825780	238380
Cre12.g489153.t1.1	Cre12.g489153.t1.1	2	2	2	Cre12.g489153.t1.1 pacid=30793408 gene-symbol=RPL31 definition=Cytosolic 80S ribosomal protein L31 annot-version=v5.5	1	2	2	2	2	2	2	2	1	2	2	2	2	2	1	2	2	2	2	2	1	2	12.3	12.3	12.3	18.64	163	163	0	12.14	By MS/MS	By MS/MS	By MS/MS	By MS/MS	By MS/MS	By MS/MS	12.3	12.3	12.3	12.3	4.9	12.3	894590	278880
Cre12.g490000.t1.2	Cre12.g490000.t1.2	2	2	2	Cre12.g490000.t1.2 pacid=30792971 gene-symbol=EIF2A definition=Eukaryotic translation initiation factor 2 subunit 1, eIF2-alpha subunit annot-version=v5.5	1	2	2	2	2	2	2	1	2	2	2	2	2	1	2	2	2	2	2	1	2	2	4.5	4.5	4.5	37.309	333	333	0	11.481	By MS/MS	By MS/MS	By MS/MS	By matching	By MS/MS	By matching	4.5	4.5	4.5	4.5	4.5	4.5	171770	34262
Cre12.g492750.t1.1	Cre12.g492750.t1.1	31	31	31	Cre12.g492750.t1.1 pacid=30792184 annot-version=v5.5	1	31	31	31	26	15	13	22	21	23	26	15	13	22	21	23	26	15	13	22	21	23	13.9	13.9	13.9	353.37	3466	3466	0	284.65	By MS/MS	By MS/MS	By MS/MS	By MS/MS	By MS/MS	By MS/MS	11.7	7.4	5.6	8.7	9.2	9.3	4852800	1953200
Cre12.g492950.t1.2	Cre12.g492950.t1.2	2	2	2	Cre12.g492950.t1.2 pacid=30792262 gene-symbol=RIR1 definition=Ribonucleoside-diphosphate reductase R1 subunit annot-version=v5.5	1	2	2	2	1	2	2	0	0	0	1	2	2	0	0	0	1	2	2	0	0	0	3	3	3	97.834	878	878	0	13.318	By MS/MS	By MS/MS	By MS/MS				0.9	3	3	0	0	0	161140	89102
Cre12.g494050.t1.2	Cre12.g494050.t1.2	5	5	5	Cre12.g494050.t1.2 pacid=30792426 gene-symbol=RPL9 definition=Cytosolic 80S ribosomal protein L9 annot-version=v5.5	1	5	5	5	5	5	5	4	5	4	5	5	5	4	5	4	5	5	5	4	5	4	33.5	33.5	33.5	21.518	191	191	0	42.385	By MS/MS	By MS/MS	By MS/MS	By MS/MS	By MS/MS	By MS/MS	33.5	33.5	33.5	26.7	33.5	26.7	1951900	411960
Cre12.g494100.t1.1	Cre12.g494100.t1.1	3	3	3	Cre12.g494100.t1.1 pacid=30793549 definition=Pre-mRNA splicing factor annot-version=v5.5	1	3	3	3	2	3	1	1	2	1	2	3	1	1	2	1	2	3	1	1	2	1	3.8	3.8	3.8	143.79	1321	1321	0	20.544	By MS/MS	By MS/MS	By MS/MS	By MS/MS	By MS/MS	By MS/MS	2.4	3.8	0.8	0.8	3	0.8	498390	51544
Cre12.g494450.t1.2	Cre12.g494450.t1.2	4	4	4	Cre12.g494450.t1.2 pacid=30791769 gene-symbol=PRPS16 definition=Chloroplast ribosomal protein S16 annot-version=v5.5	1	4	4	4	4	4	3	4	4	4	4	4	3	4	4	4	4	4	3	4	4	4	35.2	35.2	35.2	14.448	128	128	0	27.876	By MS/MS	By MS/MS	By MS/MS	By MS/MS	By MS/MS	By MS/MS	35.2	35.2	23.4	35.2	35.2	35.2	3240300	1105400
Cre12.g497250.t1.1	Cre12.g497250.t1.1	2	2	2	Cre12.g497250.t1.1 pacid=30793183 annot-version=v5.5	1	2	2	2	2	0	1	0	0	0	2	0	1	0	0	0	2	0	1	0	0	0	3	3	3	106.69	994	994	0	11.85	By MS/MS		By matching				3	0	1.1	0	0	0	92723	73750
Cre12.g497650.t1.2	Cre12.g497650.t1.2	3	3	3	Cre12.g497650.t1.2 pacid=30793521 gene-symbol=THY28 definition=Predicted protein annot-version=v5.5	1	3	3	3	3	2	2	2	2	3	3	2	2	2	2	3	3	2	2	2	2	3	13.5	13.5	13.5	30.374	289	289	0	17.958	By MS/MS	By MS/MS	By matching	By MS/MS	By MS/MS	By MS/MS	13.5	13.5	11.4	9	9	13.5	464720	146600
Cre12.g497900.t1.1	Cre12.g497900.t1.1	2	2	2	Cre12.g497900.t1.1 pacid=30792953 annot-version=v5.5	1	2	2	2	1	1	0	2	1	0	1	1	0	2	1	0	1	1	0	2	1	0	2	2	2	162.31	1636	1636	0	14.276	By matching	By matching		By MS/MS	By matching		1	1	0	2	1	0	81458	10206
Cre12.g498900.t1.2	Cre12.g498900.t1.2	3	3	3	Cre12.g498900.t1.2 pacid=30792089 gene-symbol=RPS7 definition=Cytosolic 80S ribosomal protein S7 annot-version=v5.5	1	3	3	3	3	3	3	3	3	3	3	3	3	3	3	3	3	3	3	3	3	3	20.1	20.1	20.1	22.114	194	194	0	37.323	By MS/MS	By MS/MS	By MS/MS	By MS/MS	By MS/MS	By MS/MS	20.1	20.1	20.1	20.1	20.1	20.1	1822500	548030
Cre12.g502800.t1.2	Cre12.g502800.t1.2	3	3	3	Cre12.g502800.t1.2 pacid=30793578 annot-version=v5.5	1	3	3	3	3	2	1	2	2	3	3	2	1	2	2	3	3	2	1	2	2	3	10.9	10.9	10.9	61.126	543	543	0	27.82	By MS/MS	By MS/MS	By MS/MS	By MS/MS	By MS/MS	By MS/MS	10.9	6.1	2.9	7.7	7.7	10.9	604440	209180
Cre12.g503400.t1.2	Cre12.g503400.t1.2	2	2	2	Cre12.g503400.t1.2 pacid=30792782 definition=Pre-mRNA splicing factor, SR-related protein annot-version=v5.5	1	2	2	2	2	1	1	2	2	2	2	1	1	2	2	2	2	1	1	2	2	2	3.6	3.6	3.6	54.494	467	467	0	16.772	By MS/MS	By MS/MS	By MS/MS	By MS/MS	By MS/MS	By MS/MS	3.6	3.4	3.4	3.6	3.6	3.6	1872300	295270
Cre12.g504200.t1.2	Cre12.g504200.t1.2	2	2	2	Cre12.g504200.t1.2 pacid=30792072 gene-symbol=RPS23 definition=Cytosolic 80S ribosomal protein S23 annot-version=v5.5	1	2	2	2	2	2	2	2	1	1	2	2	2	2	1	1	2	2	2	2	1	1	15.5	15.5	15.5	15.676	142	142	0	12.392	By MS/MS	By MS/MS	By MS/MS	By MS/MS	By matching	By MS/MS	15.5	15.5	15.5	15.5	7.7	7.7	211510	24830
Cre12.g508150.t1.2	Cre12.g508150.t1.2	2	2	2	Cre12.g508150.t1.2 pacid=30793288 definition=SNF2-related DNA/RNA helicase annot-version=v5.5	1	2	2	2	1	2	2	1	2	2	1	2	2	1	2	2	1	2	2	1	2	2	1.9	1.9	1.9	124.37	1086	1086	0	24.195	By MS/MS	By MS/MS	By MS/MS	By MS/MS	By MS/MS	By MS/MS	1.3	1.9	1.9	1.3	1.9	1.9	1110500	281170
Cre12.g508200.t1.2	Cre12.g508200.t1.2	3	3	3	Cre12.g508200.t1.2 pacid=30792238 annot-version=v5.5	1	3	3	3	3	3	3	3	1	1	3	3	3	3	1	1	3	3	3	3	1	1	11.2	11.2	11.2	46.705	427	427	0	21.089	By MS/MS	By MS/MS	By MS/MS	By MS/MS	By MS/MS	By MS/MS	11.2	11.2	11.2	11.2	4	4	476880	159210
Cre12.g512600.t1.2	Cre12.g512600.t1.2	2	2	2	Cre12.g512600.t1.2 pacid=30792347 gene-symbol=RPL18 definition=Cytosolic 80S ribosomal protein L18 annot-version=v5.5	1	2	2	2	2	2	2	0	1	0	2	2	2	0	1	0	2	2	2	0	1	0	19.8	19.8	19.8	20.93	187	187	0	12.446	By MS/MS	By MS/MS	By MS/MS		By matching		19.8	19.8	19.8	0	10.2	0	272330	116710
Cre12.g513150.t1.2	Cre12.g513150.t1.2	5	5	5	Cre12.g513150.t1.2 pacid=30793071 gene-symbol=MIA40 definition=mitochondrial intermembrane space protein involved in protein import. annot-version=v5.5	1	5	5	5	3	5	3	4	2	4	3	5	3	4	2	4	3	5	3	4	2	4	11.6	11.6	11.6	53.886	484	484	0	39.793	By MS/MS	By MS/MS	By MS/MS	By MS/MS	By MS/MS	By MS/MS	6	11.6	8.5	8.9	3.3	8.9	2044100	442820
Cre12.g513500.t1.2	Cre12.g513500.t1.2	4	4	4	Cre12.g513500.t1.2 pacid=30791943 gene-symbol=XAB2 definition=Transcription-coupled DNA repair protein, possible splicing factor annot-version=v5.5	1	4	4	4	4	2	2	0	1	0	4	2	2	0	1	0	4	2	2	0	1	0	4	4	4	104.22	925	925	0	25.604	By MS/MS	By MS/MS	By MS/MS		By MS/MS		4	2.1	1.1	0	1.1	0	540310	190100
Cre12.g514500.t1.2	Cre12.g514500.t1.2	6	6	6	Cre12.g514500.t1.2 pacid=30792578 gene-symbol=RPS11 definition=Cytosolic 80S ribosomal protein S11 annot-version=v5.5	1	6	6	6	5	4	5	5	3	4	5	4	5	5	3	4	5	4	5	5	3	4	30.1	30.1	30.1	17.781	156	156	0	37.523	By MS/MS	By MS/MS	By MS/MS	By MS/MS	By MS/MS	By MS/MS	30.1	26.3	30.1	30.1	24.4	26.3	1095000	311950
Cre12.g515850.t1.2	Cre12.g515850.t1.2	11	11	11	Cre12.g515850.t1.2 pacid=30793407 gene-symbol=PCN1 definition=Proliferating cell nuclear antigen homolog annot-version=v5.5	1	11	11	11	10	8	9	2	1	8	10	8	9	2	1	8	10	8	9	2	1	8	44.4	44.4	44.4	29.721	268	268	0	102.09	By MS/MS	By MS/MS	By MS/MS	By MS/MS	By matching	By MS/MS	44.4	40.3	41.4	6	7.5	41.4	2819900	1057400
Cre12.g516200.t1.2	Cre12.g516200.t1.2	7	6	6	Cre12.g516200.t1.2 pacid=30792542 gene-symbol=EFG2 definition=Ribosomal protein S5/Elongation Factor G/III/V family protein annot-version=v5.5	1	7	6	6	7	7	4	7	5	4	6	6	3	6	5	4	6	6	3	6	5	4	9.8	8.6	8.6	94.208	845	845	0	40.626	By MS/MS	By MS/MS	By MS/MS	By MS/MS	By MS/MS	By MS/MS	9.8	9.8	5.9	9.8	6.3	4.4	1468600	535380
Cre12.g518300.t1.2	Cre12.g518300.t1.2	2	2	2	Cre12.g518300.t1.2 pacid=30791790 definition=Pre-mRNA splicing factor annot-version=v5.5	1	2	2	2	2	2	2	1	2	1	2	2	2	1	2	1	2	2	2	1	2	1	24.6	24.6	24.6	15.409	134	134	0	14.155	By MS/MS	By MS/MS	By MS/MS	By MS/MS	By MS/MS	By MS/MS	24.6	24.6	24.6	18.7	24.6	18.7	763780	214590
Cre12.g519100.t1.2	Cre12.g519100.t1.2	2	2	2	Cre12.g519100.t1.2 pacid=30792077 gene-symbol=ACC1 definition=Acetyl-CoA carboxylase annot-version=v5.5	1	2	2	2	2	1	2	2	1	1	2	1	2	2	1	1	2	1	2	2	1	1	5	5	5	54.099	498	498	0	11.87	By MS/MS	By MS/MS	By MS/MS	By MS/MS	By matching	By matching	5	2.2	5	5	2.8	2.8	216110	80073
Cre12.g519180.t4.1;Cre12.g519180.t2.1;Cre12.g519180.t1.1	Cre12.g519180.t4.1;Cre12.g519180.t2.1;Cre12.g519180.t1.1	2;2;2	2;2;2	2;2;2	Cre12.g519180.t4.1 pacid=30791739 gene-symbol=EFT1a definition=Elongation factor Ts-like protein annot-version=v5.5;Cre12.g519180.t2.1 pacid=30791738 gene-symbol=EFT1a definition=Elongation factor Ts-like protein annot-version=v5.5;Cre12.g5	3	2	2	2	2	2	1	2	0	0	2	2	1	2	0	0	2	2	1	2	0	0	7.3	7.3	7.3	60.085	560	560;1013;1093	0	17.318	By MS/MS	By MS/MS	By MS/MS	By MS/MS			7.3	7.3	3.8	7.3	0	0	239060	69565
Cre12.g520200.t1.1	Cre12.g520200.t1.1	6	6	6	Cre12.g520200.t1.1 pacid=30793136 gene-symbol=CPL8 definition=Conserved in the Plant Lineage annot-version=v5.5	1	6	6	6	6	5	4	2	1	4	6	5	4	2	1	4	6	5	4	2	1	4	18.6	18.6	18.6	40.25	370	370	0	42.943	By MS/MS	By MS/MS	By MS/MS	By MS/MS	By MS/MS	By MS/MS	18.6	15.9	12.7	5.7	5.1	12.7	831050	361520
Cre12.g520500.t1.1	Cre12.g520500.t1.1	3	3	3	Cre12.g520500.t1.1 pacid=30793097 gene-symbol=RPP0 definition=Acidic ribosomal protein P0, Ribosomal protein L10 annot-version=v5.5	1	3	3	3	3	2	2	2	1	1	3	2	2	2	1	1	3	2	2	2	1	1	14.4	14.4	14.4	34.575	320	320	0	20.096	By MS/MS	By MS/MS	By MS/MS	By MS/MS	By MS/MS	By MS/MS	14.4	7.5	7.5	7.5	3.8	3.8	1208100	427240
Cre12.g520650.t1.2	Cre12.g520650.t1.2	4	4	4	Cre12.g520650.t1.2 pacid=30792471 gene-symbol=TLP1 definition=Tubby-like protein annot-version=v5.5	1	4	4	4	3	3	3	4	3	2	3	3	3	4	3	2	3	3	3	4	3	2	13.7	13.7	13.7	48.613	451	451	0	29.264	By MS/MS	By MS/MS	By MS/MS	By MS/MS	By MS/MS	By MS/MS	10.6	9.3	9.3	13.7	9.3	6.2	734220	136720
Cre12.g525200.t1.2	Cre12.g525200.t1.2	17	17	17	Cre12.g525200.t1.2 pacid=30792563 gene-symbol=NOP56 definition=Nucleolar protein, Component of C/D snoRNPs annot-version=v5.5	1	17	17	17	17	15	12	13	11	13	17	15	12	13	11	13	17	15	12	13	11	13	33.6	33.6	33.6	56.267	503	503	0	176.02	By MS/MS	By MS/MS	By MS/MS	By MS/MS	By MS/MS	By MS/MS	33.6	31.2	23.3	23.3	24.1	30.8	11344000	3767500
Cre12.g528000.t1.2	Cre12.g528000.t1.2	2	2	2	Cre12.g528000.t1.2 pacid=30793504 gene-symbol=FAP303 definition= Flagellar Associated Protein 303 annot-version=v5.5	1	2	2	2	2	2	2	1	1	1	2	2	2	1	1	1	2	2	2	1	1	1	9.8	9.8	9.8	44.199	409	409	0.0021598	11.178	By MS/MS	By MS/MS	By MS/MS	By MS/MS	By MS/MS	By matching	9.8	9.8	9.8	3.7	3.7	6.1	361570	84959
Cre12.g528750.t1.2	Cre12.g528750.t1.2	4	4	4	Cre12.g528750.t1.2 pacid=30793215 gene-symbol=RPL12 definition=Cytosolic 80S ribosomal protein L12 annot-version=v5.5	1	4	4	4	3	4	3	3	2	4	3	4	3	3	2	4	3	4	3	3	2	4	35.5	35.5	35.5	17.604	166	166	0	27.485	By MS/MS	By MS/MS	By MS/MS	By MS/MS	By MS/MS	By MS/MS	26.5	35.5	26.5	27.7	18.7	35.5	2232100	701690
Cre12.g528950.t1.1	Cre12.g528950.t1.1	3	3	3	Cre12.g528950.t1.1 pacid=30792859 gene-symbol=PUF1 definition=Puf protein annot-version=v5.5	1	3	3	3	2	3	3	1	0	1	2	3	3	1	0	1	2	3	3	1	0	1	6.2	6.2	6.2	84.369	796	796	0	20.295	By MS/MS	By MS/MS	By MS/MS	By matching		By matching	4.8	6.2	6.2	2.4	0	2.4	494130	176610
Cre12.g529400.t1.2	Cre12.g529400.t1.2	4	4	4	Cre12.g529400.t1.2 pacid=30792485 gene-symbol=RPS27E1 definition=Cytosolic 80S ribosomal protein S27, isoform A annot-version=v5.5	1	4	4	4	4	4	3	3	4	4	4	4	3	3	4	4	4	4	3	3	4	4	46.5	46.5	46.5	9.5149	86	86	0	31.801	By MS/MS	By MS/MS	By MS/MS	By MS/MS	By MS/MS	By MS/MS	46.5	46.5	37.2	31.4	46.5	46.5	1508200	456640
Cre12.g529500.t1.2	Cre12.g529500.t1.2	6	6	6	Cre12.g529500.t1.2 pacid=30792231 definition=Putative ribosomal RNA methyltransferase annot-version=v5.5	1	6	6	6	6	4	5	4	4	6	6	4	5	4	4	6	6	4	5	4	4	6	8.6	8.6	8.6	96.129	882	882	0	43.511	By MS/MS	By MS/MS	By MS/MS	By MS/MS	By MS/MS	By MS/MS	8.6	4.8	6.8	4.8	5.4	8.6	1058500	264140
Cre12.g529600.t1.2	Cre12.g529600.t1.2	38	38	38	Cre12.g529600.t1.2 pacid=30792110 gene-symbol=RPA1 definition=DNA-directed RNA polymerase I subunit 1 annot-version=v5.5	1	38	38	38	36	30	29	23	22	31	36	30	29	23	22	31	36	30	29	23	22	31	24.2	24.2	24.2	203.86	1909	1909	0	307.96	By MS/MS	By MS/MS	By MS/MS	By MS/MS	By MS/MS	By MS/MS	23.5	19.4	20.6	14.6	14.7	19.4	11673000	4411600
Cre12.g529651.t1.1	Cre12.g529651.t1.1	5	5	5	Cre12.g529651.t1.1 pacid=30793228 gene-symbol=RPL7A definition=Cytosolic 80S ribosomal protein L7a annot-version=v5.5	1	5	5	5	5	5	4	3	5	4	5	5	4	3	5	4	5	5	4	3	5	4	34.7	34.7	34.7	21.635	193	193	0	40.468	By MS/MS	By MS/MS	By MS/MS	By MS/MS	By MS/MS	By MS/MS	34.7	34.7	27.5	21.8	34.7	30.1	1464100	565090
Cre12.g531400.t1.1	Cre12.g531400.t1.1	6	6	6	Cre12.g531400.t1.1 pacid=30791792 gene-symbol=NPHP4 definition=Nephrocystin 4 annot-version=v5.5	1	6	6	6	6	6	5	3	3	1	6	6	5	3	3	1	6	6	5	3	3	1	4.5	4.5	4.5	210.84	1919	1919	0	42.497	By MS/MS	By MS/MS	By MS/MS	By MS/MS	By MS/MS	By MS/MS	4.5	4.5	3.2	1.7	2.2	0.5	694980	302110
Cre12.g531550.t1.2	Cre12.g531550.t1.2	3	3	3	Cre12.g531550.t1.2 pacid=30791804 gene-symbol=EIF5B3 definition=Eukaryotic translation initiation factor 2, beta subunit annot-version=v5.5	1	3	3	3	3	3	3	2	3	2	3	3	3	2	3	2	3	3	3	2	3	2	13	13	13	30.66	276	276	0	25.906	By MS/MS	By MS/MS	By MS/MS	By MS/MS	By MS/MS	By MS/MS	13	13	13	9.1	13	8.3	1452400	416730
Cre12.g532550.t1.1	Cre12.g532550.t1.1	5	5	5	Cre12.g532550.t1.1 pacid=30791692 gene-symbol=RPL13A definition=Cytosolic 80S ribosomal protein L13a annot-version=v5.5	1	5	5	5	4	3	3	4	3	3	4	3	3	4	3	3	4	3	3	4	3	3	20.2	20.2	20.2	19.422	173	173	0	30.731	By MS/MS	By MS/MS	By MS/MS	By MS/MS	By MS/MS	By MS/MS	20.2	11.6	13.3	18.5	6.9	12.1	1057600	251300
Cre12.g533000.t1.2	Cre12.g533000.t1.2	4	4	4	Cre12.g533000.t1.2 pacid=30791808 gene-symbol=PHR1 definition=CPD photolyase, class II annot-version=v5.5	1	4	4	4	4	3	3	2	3	2	4	3	3	2	3	2	4	3	3	2	3	2	12.9	12.9	12.9	64.831	612	612	0	24.057	By MS/MS	By MS/MS	By MS/MS	By MS/MS	By MS/MS	By MS/MS	12.9	8.8	8.8	7.5	11.8	7.5	394550	98847
Cre12.g533550.t1.1	Cre12.g533550.t1.1	3	3	3	Cre12.g533550.t1.1 pacid=30792777 gene-symbol=PYK1 definition=Pyruvate kinase annot-version=v5.5	1	3	3	3	2	1	1	1	2	1	2	1	1	1	2	1	2	1	1	1	2	1	9.4	9.4	9.4	54.64	508	508	0	17.29	By MS/MS	By MS/MS	By MS/MS	By matching	By MS/MS	By MS/MS	5.5	2	2	2	5.9	2	262380	123530
Cre12.g535851.t1.1	Cre12.g535851.t1.1	6	6	6	Cre12.g535851.t1.1 pacid=30793369 gene-symbol=RPL8 definition=Cytosolic 80S ribosomal protein L8 annot-version=v5.5	1	6	6	6	5	6	6	6	6	5	5	6	6	6	6	5	5	6	6	6	6	5	26.5	26.5	26.5	31.056	287	287	0	45.547	By MS/MS	By MS/MS	By MS/MS	By MS/MS	By MS/MS	By MS/MS	25.8	26.5	26.5	26.5	26.5	25.8	2481800	664840
Cre12.g536100.t1.2	Cre12.g536100.t1.2	5	5	5	Cre12.g536100.t1.2 pacid=30793185 gene-symbol=FAP126 definition=Flagellar Associated Protein 126 annot-version=v5.5	1	5	5	5	5	5	4	1	1	0	5	5	4	1	1	0	5	5	4	1	1	0	47.4	47.4	47.4	15.415	137	137	0	40.404	By MS/MS	By MS/MS	By MS/MS	By matching	By matching		47.4	47.4	36.5	13.1	10.9	0	620500	318080
Cre12.g537800.t1.2	Cre12.g537800.t1.2	4	4	4	Cre12.g537800.t1.2 pacid=30791776 gene-symbol=RPL7 definition=Cytosolic 80S ribosomal protein L7 annot-version=v5.5	1	4	4	4	3	4	3	1	3	2	3	4	3	1	3	2	3	4	3	1	3	2	15.1	15.1	15.1	27.575	239	239	0	27.418	By MS/MS	By MS/MS	By MS/MS	By MS/MS	By MS/MS	By MS/MS	9.6	15.1	10	4.2	10	9.2	2839000	956890
Cre12.g538500.t1.1	Cre12.g538500.t1.1	6	6	6	Cre12.g538500.t1.1 pacid=30792430 annot-version=v5.5	1	6	6	6	6	5	4	2	1	4	6	5	4	2	1	4	6	5	4	2	1	4	18	18	18	73.976	724	724	0	41.75	By MS/MS	By MS/MS	By MS/MS	By MS/MS	By MS/MS	By MS/MS	18	14.6	10.6	3.6	3.3	9.8	897660	389340
Cre12.g539100.t1.1	Cre12.g539100.t1.1	24	24	24	Cre12.g539100.t1.1 pacid=30792646 gene-symbol=HEL57 definition=DEAD box RNA helicase annot-version=v5.5	1	24	24	24	17	21	17	19	18	19	17	21	17	19	18	19	17	21	17	19	18	19	43.3	43.3	43.3	67.891	623	623	0	195.62	By MS/MS	By MS/MS	By MS/MS	By MS/MS	By MS/MS	By MS/MS	30.3	40.3	31	36.8	33.9	35.8	10579000	2506200
Cre12.g539750.t1.2	Cre12.g539750.t1.2	13	13	13	Cre12.g539750.t1.2 pacid=30793137 annot-version=v5.5	1	13	13	13	12	12	10	11	11	11	12	12	10	11	11	11	12	12	10	11	11	11	24.1	24.1	24.1	49.919	482	482	0	91.481	By MS/MS	By MS/MS	By MS/MS	By MS/MS	By MS/MS	By MS/MS	22.8	23.9	20.3	24.1	24.1	22.8	5198700	1487900
Cre12.g540200.t1.2	Cre12.g540200.t1.2	3	3	3	Cre12.g540200.t1.2 pacid=30792196 gene-symbol=HEL58 definition=DEAD/DEAH box helicase annot-version=v5.5	1	3	3	3	3	2	0	2	2	1	3	2	0	2	2	1	3	2	0	2	2	1	4.7	4.7	4.7	112.66	1117	1117	0	17.506	By MS/MS	By matching		By MS/MS	By MS/MS	By MS/MS	4.7	2.6	0	2.6	2.6	1.2	190820	81706
Cre12.g549550.t1.2;Cre12.g542250.t1.1	Cre12.g549550.t1.2;Cre12.g542250.t1.1	27;27	27;27	27;27	Cre12.g549550.t1.2 pacid=30793443 gene-symbol=TUB2 definition=beta-2 tubulin annot-version=v5.5;Cre12.g542250.t1.1 pacid=30793243 gene-symbol=TUB1 definition=beta-1 tubulin annot-version=v5.5	2	27	27	27	27	22	21	18	18	16	27	22	21	18	18	16	27	22	21	18	18	16	65.5	65.5	65.5	49.618	443	443;443	0	323.31	By MS/MS	By MS/MS	By MS/MS	By MS/MS	By MS/MS	By MS/MS	65.5	60.5	52.8	49	49.7	45.6	38482000	19987000
Cre12.g544000.t1.2	Cre12.g544000.t1.2	2	2	2	Cre12.g544000.t1.2 pacid=30793444 gene-symbol=RSP5 definition=Radial Spoke Protein 5 annot-version=v5.5	1	2	2	2	2	1	1	0	0	0	2	1	1	0	0	0	2	1	1	0	0	0	5.8	5.8	5.8	55.355	521	521	0	13.097	By MS/MS	By MS/MS	By matching				5.8	1.7	1.7	0	0	0	164360	120570
Cre12.g547651.t4.1;Cre12.g547651.t3.1;Cre12.g547651.t1.1	Cre12.g547651.t4.1;Cre12.g547651.t3.1;Cre12.g547651.t1.1	4;4;4	4;4;4	4;4;4	Cre12.g547651.t4.1 pacid=30792316 annot-version=v5.5;Cre12.g547651.t3.1 pacid=30792313 annot-version=v5.5;Cre12.g547651.t1.1 pacid=30792314 annot-version=v5.5	3	4	4	4	4	4	3	2	2	1	4	4	3	2	2	1	4	4	3	2	2	1	4.1	4.1	4.1	139.52	1325	1325;2939;2939	0	25.177	By MS/MS	By MS/MS	By MS/MS	By MS/MS	By MS/MS	By matching	4.1	4.1	2.7	2.6	2.6	1.4	330450	122880
Cre12.g548000.t1.2	Cre12.g548000.t1.2	14	14	14	Cre12.g548000.t1.2 pacid=30793370 annot-version=v5.5	1	14	14	14	12	9	13	9	7	8	12	9	13	9	7	8	12	9	13	9	7	8	10	10	10	255.54	2536	2536	0	120.04	By MS/MS	By MS/MS	By MS/MS	By MS/MS	By MS/MS	By MS/MS	9.3	7.5	9.9	7.3	4.1	5.3	2727500	896440
Cre12.g549100.t4.1;Cre12.g549100.t3.1;Cre12.g549100.t2.1;Cre12.g549100.t1.1	Cre12.g549100.t4.1;Cre12.g549100.t3.1;Cre12.g549100.t2.1;Cre12.g549100.t1.1	3;3;3;3	3;3;3;3	3;3;3;3	Cre12.g549100.t4.1 pacid=30792475 gene-symbol=UAF3 definition=splicing factor U2AF 65 kDa subunit annot-version=v5.5;Cre12.g549100.t3.1 pacid=30792474 gene-symbol=UAF3 definition=splicing factor U2AF 65 kDa subunit annot-version=v5.5;Cre12.	4	3	3	3	3	2	2	1	1	1	3	2	2	1	1	1	3	2	2	1	1	1	16.7	16.7	16.7	32.49	300	300;447;462;464	0	23.912	By MS/MS	By MS/MS	By MS/MS	By MS/MS	By matching	By matching	16.7	11	14.3	2.3	5.7	8.7	307730	159410
Cre12.g549750.t1.2	Cre12.g549750.t1.2	4	4	4	Cre12.g549750.t1.2 pacid=30793319 gene-symbol=FAP4 definition=Flagellar Associated Protein 4 annot-version=v5.5	1	4	4	4	4	4	3	3	4	3	4	4	3	3	4	3	4	4	3	3	4	3	13.5	13.5	13.5	38.432	333	333	0	31.516	By MS/MS	By MS/MS	By MS/MS	By MS/MS	By MS/MS	By MS/MS	13.5	13.5	9.6	9.6	13.5	9.6	1057300	226840
Cre12.g550700.t1.2	Cre12.g550700.t1.2	2	2	2	Cre12.g550700.t1.2 pacid=30793240 annot-version=v5.5	1	2	2	2	2	2	1	2	2	1	2	2	1	2	2	1	2	2	1	2	2	1	12.7	12.7	12.7	31.535	299	299	0	12.425	By MS/MS	By MS/MS	By matching	By MS/MS	By MS/MS	By MS/MS	12.7	12.7	5.4	12.7	12.7	5.4	229070	60333
Cre12.g550850.t1.2	Cre12.g550850.t1.2	3	3	3	Cre12.g550850.t1.2 pacid=30791734 gene-symbol=PSBP1 definition=Photosystem II Oxygen Evolution Enhancer protein 2 annot-version=v5.5	1	3	3	3	1	2	3	3	3	0	1	2	3	3	3	0	1	2	3	3	3	0	24.5	24.5	24.5	25.899	245	245	0	27.302	By MS/MS	By MS/MS	By MS/MS	By MS/MS	By MS/MS		8.6	17.1	24.5	24.5	24.5	0	1254500	103520
Cre12.g553250.t1.2	Cre12.g553250.t1.2	17	17	16	Cre12.g553250.t1.2 pacid=30791938 gene-symbol=PFK2 definition=Phosphofructokinase annot-version=v5.5	1	17	17	16	15	16	13	15	13	13	15	16	13	15	13	13	14	15	12	14	12	12	39.5	39.5	37.7	54.773	512	512	0	206.04	By MS/MS	By MS/MS	By MS/MS	By MS/MS	By MS/MS	By MS/MS	39.1	33.4	28.7	36.9	32	31.8	14036000	3848700
Cre12.g556250.t1.2	Cre12.g556250.t1.2	3	3	3	Cre12.g556250.t1.2 pacid=30793455 definition=Septin-like protein annot-version=v5.5	1	3	3	3	3	2	2	1	1	1	3	2	2	1	1	1	3	2	2	1	1	1	8.1	8.1	8.1	54.238	481	481	0	17.555	By MS/MS	By MS/MS	By MS/MS	By matching	By matching	By matching	8.1	4.8	4.8	1.7	3.3	3.1	178800	76271
Cre12.g560950.t1.2	Cre12.g560950.t1.2	2	2	2	Cre12.g560950.t1.2 pacid=30792049 gene-symbol=PSAG definition=Photosystem I reaction center subunit V annot-version=v5.5	1	2	2	2	2	1	2	2	2	1	2	1	2	2	2	1	2	1	2	2	2	1	18.3	18.3	18.3	13.223	126	126	0	12.942	By MS/MS	By MS/MS	By MS/MS	By matching	By MS/MS	By MS/MS	18.3	9.5	18.3	18.3	18.3	8.7	288490	87299
Cre13.g567450.t1.2	Cre13.g567450.t1.2	8	8	8	Cre13.g567450.t1.2 pacid=30784737 gene-symbol=HON1 definition=Histone H1 annot-version=v5.5	1	8	8	8	8	8	5	6	6	8	8	8	5	6	6	8	8	8	5	6	6	8	31.9	31.9	31.9	27.355	254	254	0	323.31	By MS/MS	By MS/MS	By MS/MS	By MS/MS	By MS/MS	By MS/MS	31.9	31.9	17.3	18.9	18.9	31.9	45134000	18815000
Cre13.g567700.t1.2	Cre13.g567700.t1.2	6	5	5	Cre13.g567700.t1.2 pacid=30783996 gene-symbol=HAV2 definition=Histone H2A variant annot-version=v5.5	1	6	5	5	5	4	4	3	3	6	4	3	3	3	3	5	4	3	3	3	3	5	31.9	31.9	31.9	15.262	144	144	0	81.89	By MS/MS	By MS/MS	By MS/MS	By MS/MS	By MS/MS	By MS/MS	25	22.9	22.9	22.9	22.9	31.9	21516000	8115200
Cre13.g568650.t1.2	Cre13.g568650.t1.2	4	4	4	Cre13.g568650.t1.2 pacid=30784327 gene-symbol=RPS3A definition=Cytosolic 80S ribosomal protein S3a annot-version=v5.5	1	4	4	4	3	3	4	4	4	3	3	3	4	4	4	3	3	3	4	4	4	3	22.8	22.8	22.8	29.331	259	259	0	24.583	By MS/MS	By MS/MS	By MS/MS	By MS/MS	By MS/MS	By MS/MS	15.8	18.9	22.8	22.8	22.8	15.8	644690	161980
Cre13.g568900.t1.2	Cre13.g568900.t1.2	2	2	2	Cre13.g568900.t1.2 pacid=30784330 gene-symbol=RPL17 definition=Cytosolic 80S ribosomal protein L17 annot-version=v5.5	1	2	2	2	2	2	1	2	2	2	2	2	1	2	2	2	2	2	1	2	2	2	9.1	9.1	9.1	21.145	186	186	0	12.562	By MS/MS	By MS/MS	By matching	By MS/MS	By matching	By MS/MS	9.1	9.1	3.8	9.1	9.1	9.1	423400	134540
Cre13.g570050.t1.2;Cre12.g504550.t1.2;Cre17.g714050.t1.2;Cre17.g713450.t1.2;Cre17.g711750.t1.2;Cre17.g710450.t1.2;Cre17.g709150.t1.2;Cre12.g506200.t1.2;Cre12.g505600.t1.2;Cre12.g504700.t1.2;Cre06.g276900.t1.2;Cre17.g714550.t1.2;Cre06.g276550.t1.2;Cre06.g274750.t1.2;Cre06.g274250.t1.2;Cre06.g273850.t1.2;Cre06.g268250.t1.2;Cre06.g268100.t1.2;Cre06.g266750.t1.2;Cre06.g265400.t1.2;Cre06.g264900.t1.1;…	Cre13.g570050.t1.2;Cre12.g504550.t1.2;Cre17.g714050.t1.2;Cre17.g713450.t1.2;Cre17.g711750.t1.2;Cre17.g710450.t1.2;Cre17.g709150.t1.2;Cre12.g506200.t1.2;Cre12.g505600.t1.2;Cre12.g504700.t1.2;Cre06.g276900.t1.2;Cre17.g714550.t1.2;Cre06.g276550.t1.2;Cre06.g274750.t1.2;Cre06.g274250.t1.2;Cre06.g273850.t1.2;Cre06.g268250.t1.2;Cre06.g268100.t1.2;Cre06.g266750.t1.2;Cre06.g265400.t1.2;Cre06.g264900.t1.1;…	13;12;12;12;12;12;12;12;12;12;12;12;12;12;12;12;12;12;12;12;12;12;12;9	13;12;12;12;12;12;12;12;12;12;12;12;12;12;12;12;12;12;12;12;12;12;12;9	1;0;0;0;0;0;0;0;0;0;0;0;0;0;0;0;0;0;0;0;0;0;0;0	Cre13.g570050.t1.2 pacid=30784307 gene-symbol=HTB20 definition=Histone H2B annot-version=v5.5;Cre12.g504550.t1.2 pacid=30792324 gene-symbol=HTB15 definition=Histone H2B annot-version=v5.5;Cre17.g714050.t1.2 pacid=30782614 gene-symbol=HTB	24	13	13	1	13	11	8	8	9	13	13	11	8	8	9	13	1	1	1	1	0	1	66	66	12.2	16.903	156	156;152;153;153;153;153;153;153;153;153;153;153;153;153;153;153;153;153;153;153;153;153;153;137	0	323.31	By MS/MS	By MS/MS	By MS/MS	By MS/MS	By MS/MS	By MS/MS	66	63.5	59	56.4	46.8	66	105260000	31409000
Cre13.g571650.t1.2	Cre13.g571650.t1.2	2	2	2	Cre13.g571650.t1.2 pacid=30783953 gene-symbol=RPB10 definition=DNA-directed RNA polymerases I/II/III subunit 10 annot-version=v5.5	1	2	2	2	2	1	2	1	1	1	2	1	2	1	1	1	2	1	2	1	1	1	25.3	25.3	25.3	8.9543	79	79	0	15.655	By MS/MS	By MS/MS	By matching	By MS/MS	By MS/MS	By MS/MS	25.3	11.4	25.3	11.4	11.4	11.4	693200	265390
Cre13.g573351.t1.2	Cre13.g573351.t1.2	2	2	2	Cre13.g573351.t1.2 pacid=30784543 annot-version=v5.5	1	2	2	2	2	2	2	2	2	1	2	2	2	2	2	1	2	2	2	2	2	1	12.7	12.7	12.7	15.978	142	142	0	50.433	By MS/MS	By MS/MS	By MS/MS	By MS/MS	By MS/MS	By MS/MS	12.7	12.7	12.7	12.7	12.7	7	680410	178870
Cre13.g577900.t1.2	Cre13.g577900.t1.2	2	2	2	Cre13.g577900.t1.2 pacid=30784032 annot-version=v5.5	1	2	2	2	1	1	2	2	1	1	1	1	2	2	1	1	1	1	2	2	1	1	23	23	23	15.82	161	161	0	13.12	By MS/MS	By MS/MS	By MS/MS	By MS/MS	By MS/MS	By MS/MS	13.7	13.7	23	23	13.7	13.7	408350	97696
Cre13.g583550.t1.2	Cre13.g583550.t1.2	2	2	2	Cre13.g583550.t1.2 pacid=30784036 gene-symbol=VIPP1 definition=Vesicle inducing protein in plastids 1 annot-version=v5.5	1	2	2	2	0	0	1	1	1	1	0	0	1	1	1	1	0	0	1	1	1	1	10.4	10.4	10.4	31.612	288	288	0	11.967			By MS/MS	By MS/MS	By matching	By matching	0	0	4.5	5.9	4.5	4.5	70277	0
Cre13.g583935.t2.1;Cre14.g631500.t1.1;Cre13.g583935.t1.1;Cre13.g572312.t1.1	Cre13.g583935.t2.1;Cre14.g631500.t1.1;Cre13.g583935.t1.1;Cre13.g572312.t1.1	2;2;2;1	2;2;2;1	2;2;2;1	Cre13.g583935.t2.1 pacid=30784779 annot-version=v5.5;Cre14.g631500.t1.1 pacid=30776186 annot-version=v5.5;Cre13.g583935.t1.1 pacid=30784778 annot-version=v5.5;Cre13.g572312.t1.1 pacid=30784685 annot-version=v5.5	4	2	2	2	2	0	1	0	0	2	2	0	1	0	0	2	2	0	1	0	0	2	3.8	3.8	3.8	62.939	611	611;645;645;328	0	12.22	By MS/MS		By MS/MS			By MS/MS	3.8	0	2	0	0	3.8	191160	147550
Cre13.g584400.t1.2	Cre13.g584400.t1.2	6	6	6	Cre13.g584400.t1.2 pacid=30784234 gene-symbol=FAP189 definition=Coiled-Coil Flagellar Associated Protein 189 annot-version=v5.5	1	6	6	6	4	5	2	1	1	1	4	5	2	1	1	1	4	5	2	1	1	1	9.4	9.4	9.4	101.97	868	868	0	39.043	By MS/MS	By MS/MS	By MS/MS	By matching	By matching	By matching	6.8	7.6	3.5	1.6	1.8	1.6	340890	160170
Cre13.g586916.t1.1	Cre13.g586916.t1.1	12	12	12	Cre13.g586916.t1.1 pacid=30783868 gene-symbol=SRS6 definition=Serine/arginine-rich pre-mRNA splicing factor annot-version=v5.5	1	12	12	12	12	12	9	11	12	10	12	12	9	11	12	10	12	12	9	11	12	10	24.5	24.5	24.5	33.954	286	286	0	116.8	By MS/MS	By MS/MS	By MS/MS	By MS/MS	By MS/MS	By MS/MS	24.5	24.5	23.4	24.5	24.5	24.5	13466000	4600600
Cre13.g591200.t1.2;Cre13.g590750.t1.2	Cre13.g591200.t1.2;Cre13.g590750.t1.2	12;12	3;3	3;3	Cre13.g591200.t1.2 pacid=30784473 gene-symbol=HTB22 definition=Histone H2B annot-version=v5.5;Cre13.g590750.t1.2 pacid=30783880 gene-symbol=HTB21 definition=Histone H2B annot-version=v5.5	2	12	3	3	12	9	6	7	8	11	3	1	0	2	1	2	3	1	0	2	1	2	54.2	10.3	10.3	16.764	155	155;155	0	29.276	By MS/MS	By MS/MS	By matching	By MS/MS	By MS/MS	By MS/MS	54.2	51.6	39.4	45.2	47.1	53.5	1290200	744780
Cre13.g592150.t1.2	Cre13.g592150.t1.2	2	2	2	Cre13.g592150.t1.2 pacid=30784026 definition=DEAD/DEAH box helicase, possible nuclear pre-mRNA splicing factor annot-version=v5.5	1	2	2	2	2	2	2	1	1	1	2	2	2	1	1	1	2	2	2	1	1	1	2.6	2.6	2.6	102.76	907	907	0	12.203	By MS/MS	By MS/MS	By MS/MS	By MS/MS	By MS/MS	By matching	2.6	2.6	2.6	1.3	1.3	1.3	483520	219240
Cre13.g602850.t1.1	Cre13.g602850.t1.1	7	7	7	Cre13.g602850.t1.1 pacid=30784380 gene-symbol=SRS8 definition=Serine/arginine-rich pre-mRNA splicing factor annot-version=v5.5	1	7	7	7	7	6	6	7	7	6	7	6	6	7	7	6	7	6	6	7	7	6	18.7	18.7	18.7	25.72	214	214	0	56.693	By MS/MS	By MS/MS	By MS/MS	By MS/MS	By MS/MS	By MS/MS	18.7	17.3	18.7	18.7	18.7	18.7	3745000	1209700
Cre13.g603700.t1.2	Cre13.g603700.t1.2	4	4	4	Cre13.g603700.t1.2 pacid=30784404 gene-symbol=DII4 definition=Actin, flagellar inner arm dynein subunit annot-version=v5.5	1	4	4	4	4	2	4	3	3	3	4	2	4	3	3	3	4	2	4	3	3	3	13.5	13.5	13.5	41.836	377	377	0	26.373	By MS/MS	By MS/MS	By MS/MS	By MS/MS	By MS/MS	By MS/MS	13.5	5.6	13.5	10.6	10.6	10.6	929580	299800
Cre13.g606850.t1.2	Cre13.g606850.t1.2	5	5	5	Cre13.g606850.t1.2 pacid=30784338 annot-version=v5.5	1	5	5	5	4	3	3	3	3	3	4	3	3	3	3	3	4	3	3	3	3	3	9.9	9.9	9.9	86.019	851	851	0	56.926	By MS/MS	By MS/MS	By MS/MS	By MS/MS	By MS/MS	By MS/MS	8.5	6.3	6.5	6.3	6	7.2	859980	345690
Cre13.g607650.t1.1	Cre13.g607650.t1.1	7	7	7	Cre13.g607650.t1.1 pacid=30784196 annot-version=v5.5	1	7	7	7	7	6	4	3	2	3	7	6	4	3	2	3	7	6	4	3	2	3	1.8	1.8	1.8	500.52	4632	4632	0	53.89	By MS/MS	By MS/MS	By MS/MS	By MS/MS	By MS/MS	By MS/MS	1.8	1.6	1	0.8	0.5	0.6	898680	415110
Cre14.g610900.t1.1	Cre14.g610900.t1.1	2	2	2	Cre14.g610900.t1.1 pacid=30776541 annot-version=v5.5	1	2	2	2	2	2	2	1	1	1	2	2	2	1	1	1	2	2	2	1	1	1	3.8	3.8	3.8	87.98	817	817	0	16.877	By MS/MS	By MS/MS	By MS/MS	By matching	By matching	By matching	3.8	3.8	3.8	2.4	2.4	2.4	174380	64175
Cre14.g612450.t1.2	Cre14.g612450.t1.2	4	4	4	Cre14.g612450.t1.2 pacid=30776298 gene-symbol=PRPL15 definition=Chloroplast ribosomal protein L15 annot-version=v5.5	1	4	4	4	3	2	2	4	4	4	3	2	2	4	4	4	3	2	2	4	4	4	19.5	19.5	19.5	26.041	246	246	0	24.362	By MS/MS	By MS/MS	By MS/MS	By MS/MS	By MS/MS	By MS/MS	12.2	10.2	13.8	19.5	19.5	19.5	788670	168960
Cre14.g613800.t1.1	Cre14.g613800.t1.1	5	5	5	Cre14.g613800.t1.1 pacid=30776484 annot-version=v5.5	1	5	5	5	1	5	1	0	0	0	1	5	1	0	0	0	1	5	1	0	0	0	11.6	11.6	11.6	48.267	450	450	0	30.576	By matching	By MS/MS	By MS/MS				2.4	11.6	2.4	0	0	0	541150	33387
Cre14.g617900.t1.2	Cre14.g617900.t1.2	4	4	4	Cre14.g617900.t1.2 pacid=30776584 gene-symbol=RPL35 definition=Cytosolic 80S ribosomal protein L35 annot-version=v5.5	1	4	4	4	3	3	4	4	2	4	3	3	4	4	2	4	3	3	4	4	2	4	24.6	24.6	24.6	14.864	130	130	0	38.59	By MS/MS	By MS/MS	By MS/MS	By MS/MS	By MS/MS	By MS/MS	16.9	16.9	24.6	24.6	16.9	24.6	2603400	724880
Cre14.g620600.t1.2;Cre14.g620702.t1.1	Cre14.g620600.t1.2;Cre14.g620702.t1.1	2;2	2;2	2;2	Cre14.g620600.t1.2 pacid=30776185 gene-symbol=PHC2 definition=Pherophorin-chlamydomonas homolog 2 annot-version=v5.5;Cre14.g620702.t1.1 pacid=30776189 gene-symbol=PHC24 definition=Pherophorin-chlamydomonas homolog 24 annot-version=v5.5	2	2	2	2	1	1	2	2	1	1	1	1	2	2	1	1	1	1	2	2	1	1	5.1	5.1	5.1	51.691	495	495;501	0	11.962	By MS/MS	By MS/MS	By MS/MS	By MS/MS	By MS/MS	By MS/MS	3	3	5.1	5.1	2	2	195660	30251
Cre14.g620850.t1.2	Cre14.g620850.t1.2	4	4	4	Cre14.g620850.t1.2 pacid=30776778 gene-symbol=NSG17 definition=Basic helix-loop-helix transcription factor annot-version=v5.5	1	4	4	4	4	3	2	2	1	2	4	3	2	2	1	2	4	3	2	2	1	2	12.3	12.3	12.3	53.833	535	535	0	36.719	By MS/MS	By MS/MS	By MS/MS	By MS/MS	By MS/MS	By MS/MS	12.3	10.7	5.6	5	3.4	8.4	1484900	385020
Cre14.g621000.t1.2	Cre14.g621000.t1.2	9	9	9	Cre14.g621000.t1.2 pacid=30776341 definition=Pre-mRNA splicing factor annot-version=v5.5	1	9	9	9	7	5	8	3	3	2	7	5	8	3	3	2	7	5	8	3	3	2	10.7	10.7	10.7	96.559	835	835	0	55.658	By MS/MS	By MS/MS	By MS/MS	By matching	By MS/MS	By MS/MS	8	5.7	8.6	3.6	3.7	2.6	1070800	270660
Cre14.g621450.t1.2	Cre14.g621450.t1.2	3	3	3	Cre14.g621450.t1.2 pacid=30776682 gene-symbol=RPL5 definition=Cytosolic 80S ribosomal protein L5 annot-version=v5.5	1	3	3	3	3	3	3	3	2	1	3	3	3	3	2	1	3	3	3	3	2	1	10.6	10.6	10.6	33.672	293	293	0	17.355	By MS/MS	By MS/MS	By MS/MS	By MS/MS	By MS/MS	By MS/MS	10.6	10.6	10.6	10.6	8.2	5.1	1347200	397370
Cre14.g628100.t1.2	Cre14.g628100.t1.2	3	3	3	Cre14.g628100.t1.2 pacid=30776429 definition=Putative hnRNP splicing factor annot-version=v5.5	1	3	3	3	1	3	1	1	1	1	1	3	1	1	1	1	1	3	1	1	1	1	9.5	9.5	9.5	55.757	546	546	0	26.851	By MS/MS	By MS/MS	By MS/MS	By matching	By matching	By MS/MS	3.8	9.5	3.8	4.2	4.2	4.2	145920	31794
Cre14.g630100.t1.2	Cre14.g630100.t1.2	9	9	9	Cre14.g630100.t1.2 pacid=30776357 gene-symbol=RPL13 definition=Cytosolic 80S ribosomal protein L12 annot-version=v5.5	1	9	9	9	9	8	7	9	6	7	9	8	7	9	6	7	9	8	7	9	6	7	39	39	39	24.483	218	218	0	64.557	By MS/MS	By MS/MS	By MS/MS	By MS/MS	By MS/MS	By MS/MS	39	33.5	34.9	39	30.7	29.4	4623000	1568100
Cre14.g633400.t1.1	Cre14.g633400.t1.1	3	3	3	Cre14.g633400.t1.1 pacid=30776172 gene-symbol=PGA7 definition=Putative phospholipid/glycerol acyltransferase annot-version=v5.5	1	3	3	3	3	2	3	2	2	3	3	2	3	2	2	3	3	2	3	2	2	3	4	4	4	143.23	1463	1463	0	19.16	By MS/MS	By MS/MS	By MS/MS	By MS/MS	By MS/MS	By MS/MS	4	2.9	4	2.8	2.9	4	410910	145380
Cre14.g633950.t1.2	Cre14.g633950.t1.2	4	4	4	Cre14.g633950.t1.2 pacid=30776604 annot-version=v5.5	1	4	4	4	3	3	4	2	2	2	3	3	4	2	2	2	3	3	4	2	2	2	15.7	15.7	15.7	34.671	338	338	0	28.731	By MS/MS	By MS/MS	By MS/MS	By MS/MS	By MS/MS	By MS/MS	13	11.8	15.7	5.9	7.1	5.9	705240	175200
Cre16.g650600.t1.2	Cre16.g650600.t1.2	4	4	4	Cre16.g650600.t1.2 pacid=30777876 gene-symbol=MST1 definition=Mastigoneme-like flagellar protein annot-version=v5.5	1	4	4	4	1	4	4	0	3	0	1	4	4	0	3	0	1	4	4	0	3	0	4.3	4.3	4.3	205.29	1987	1987	0	31.657	By MS/MS	By MS/MS	By MS/MS		By MS/MS		1.1	4.3	4.3	0	3.7	0	336170	52278
Cre16.g653450.t1.2	Cre16.g653450.t1.2	3	3	3	Cre16.g653450.t1.2 pacid=30776819 annot-version=v5.5	1	3	3	3	3	0	1	0	0	2	3	0	1	0	0	2	3	0	1	0	0	2	10.6	10.6	10.6	45.103	398	398	0	19.665	By MS/MS		By MS/MS			By MS/MS	10.6	0	4.3	0	0	6.5	405700	269780
Cre16.g654300.t1.2	Cre16.g654300.t1.2	2	2	2	Cre16.g654300.t1.2 pacid=30778202 gene-symbol=RSP23 definition=Radial Spoke Protein 23 annot-version=v5.5	1	2	2	2	2	2	2	0	0	0	2	2	2	0	0	0	2	2	2	0	0	0	6.7	6.7	6.7	61.364	586	586	0	14.856	By MS/MS	By MS/MS	By matching				6.7	6.7	6.7	0	0	0	319120	184130
Cre16.g655750.t1.2	Cre16.g655750.t1.2	6	6	6	Cre16.g655750.t1.2 pacid=30777911 gene-symbol=TEK1 definition=Tektin annot-version=v5.5	1	6	6	6	6	5	4	0	0	0	6	5	4	0	0	0	6	5	4	0	0	0	18.9	18.9	18.9	52.839	482	482	0	49.911	By MS/MS	By MS/MS	By MS/MS				18.9	14.5	11	0	0	0	1040200	663370
Cre16.g656250.t1.1	Cre16.g656250.t1.1	4	4	4	Cre16.g656250.t1.1 pacid=30778170 gene-symbol=SMP12 definition=U1 small nuclear ribonucleoprotein annot-version=v5.5	1	4	4	4	4	4	3	4	2	4	4	4	3	4	2	4	4	4	3	4	2	4	14.2	14.2	14.2	45.511	394	394	0	25.789	By MS/MS	By MS/MS	By MS/MS	By MS/MS	By MS/MS	By MS/MS	14.2	14.2	10.7	14.2	8.1	14.2	678760	122820
Cre16.g659150.t1.1	Cre16.g659150.t1.1	2	2	2	Cre16.g659150.t1.1 pacid=30777470 annot-version=v5.5	1	2	2	2	2	2	1	1	2	1	2	2	1	1	2	1	2	2	1	1	2	1	2.7	2.7	2.7	91.864	925	925	0	14.449	By MS/MS	By MS/MS	By MS/MS	By MS/MS	By MS/MS	By MS/MS	2.7	2.7	1.3	1.3	2.7	1.3	282460	57815
Cre16.g659600.t1.1	Cre16.g659600.t1.1	6	6	6	Cre16.g659600.t1.1 pacid=30777240 annot-version=v5.5	1	6	6	6	5	3	4	1	3	5	5	3	4	1	3	5	5	3	4	1	3	5	9.1	9.1	9.1	109.78	1064	1064	0	44.396	By MS/MS	By MS/MS	By MS/MS	By MS/MS	By MS/MS	By MS/MS	6.9	5.5	6.5	1	5.3	8	514050	164130
Cre16.g659950.t1.1	Cre16.g659950.t1.1	4	4	4	Cre16.g659950.t1.1 pacid=30778100 gene-symbol=PRPS5 definition=Chloroplast Ribosomal Protein S5 annot-version=v5.5	1	4	4	4	4	3	2	3	4	3	4	3	2	3	4	3	4	3	2	3	4	3	5.3	5.3	5.3	72.029	673	673	0	55.806	By MS/MS	By MS/MS	By MS/MS	By MS/MS	By MS/MS	By MS/MS	5.3	4.3	4.3	4.3	5.3	5.3	733910	323380
Cre16.g660150.t1.2	Cre16.g660150.t1.2	3	3	3	Cre16.g660150.t1.2 pacid=30777532 annot-version=v5.5	1	3	3	3	3	3	2	3	1	3	3	3	2	3	1	3	3	3	2	3	1	3	33.9	33.9	33.9	13.307	121	121	0	19.331	By MS/MS	By MS/MS	By MS/MS	By MS/MS	By matching	By MS/MS	33.9	33.9	19.8	33.9	9.9	33.9	637680	228430
Cre16.g661050.t1.2	Cre16.g661050.t1.2	3	3	3	Cre16.g661050.t1.2 pacid=30777324 gene-symbol=RPL34 definition=Cytosolic 80S ribosomal protein L34 annot-version=v5.5	1	3	3	3	1	2	3	3	1	0	1	2	3	3	1	0	1	2	3	3	1	0	10.3	10.3	10.3	13.576	117	117	0	18.868	By MS/MS	By MS/MS	By MS/MS	By MS/MS	By MS/MS		10.3	10.3	10.3	10.3	9.4	0	585530	75717
Cre16.g661450.t1.2	Cre16.g661450.t1.2	4	2	2	Cre16.g661450.t1.2 pacid=30777754 gene-symbol=HTV3 definition=Histone H3 variant annot-version=v5.5	1	4	2	2	4	3	4	2	3	4	2	1	2	2	2	2	2	1	2	2	2	2	15.4	7.7	7.7	17.339	156	156	0	11.953	By MS/MS	By MS/MS	By MS/MS	By MS/MS	By MS/MS	By MS/MS	15.4	14.7	15.4	7.7	15.4	15.4	618640	128230
Cre16.g662852.t1.1	Cre16.g662852.t1.1	2	2	2	Cre16.g662852.t1.1 pacid=30777781 annot-version=v5.5	1	2	2	2	2	1	1	1	1	0	2	1	1	1	1	0	2	1	1	1	1	0	32.9	32.9	32.9	8.834	79	79	0	14.457	By MS/MS	By MS/MS	By MS/MS	By MS/MS	By matching		32.9	17.7	15.2	15.2	15.2	0	366990	170210
Cre16.g663200.t1.1	Cre16.g663200.t1.1	2	2	2	Cre16.g663200.t1.1 pacid=30777827 gene-symbol=FAP295 definition=Flagellar Associated Protein 295 annot-version=v5.5	1	2	2	2	2	1	1	0	0	1	2	1	1	0	0	1	2	1	1	0	0	1	4.8	4.8	4.8	79.657	707	707	0	12.175	By MS/MS	By MS/MS	By MS/MS			By matching	4.8	2.1	2.1	0	0	2.1	125090	86720
Cre16.g664550.t1.2	Cre16.g664550.t1.2	5	5	5	Cre16.g664550.t1.2 pacid=30776923 gene-symbol=SHMT1 definition=Serine hydroxymethyltransferase annot-version=v5.5	1	5	5	5	4	5	3	4	2	3	4	5	3	4	2	3	4	5	3	4	2	3	16.5	16.5	16.5	57.173	520	520	0	31.04	By MS/MS	By MS/MS	By MS/MS	By MS/MS	By MS/MS	By MS/MS	12.9	16.5	7.9	12.9	5.4	9.4	592460	183580
Cre16.g666301.t1.2	Cre16.g666301.t1.2	2	2	2	Cre16.g666301.t1.2 pacid=30777782 gene-symbol=RPS30 definition=Cytosolic 80S ribosomal protein S30 annot-version=v5.5	1	2	2	2	2	2	2	2	2	2	2	2	2	2	2	2	2	2	2	2	2	2	17.7	17.7	17.7	6.9722	62	62	0	17.742	By MS/MS	By MS/MS	By MS/MS	By MS/MS	By MS/MS	By MS/MS	17.7	17.7	17.7	17.7	17.7	17.7	1937800	637990
Cre16.g667750.t1.2	Cre16.g667750.t1.2	2	2	2	Cre16.g667750.t1.2 pacid=30776850 gene-symbol=RPB7 definition=DNA-directed RNA polymerase II, 19 kDa polypeptide annot-version=v5.5	1	2	2	2	2	1	2	2	1	2	2	1	2	2	1	2	2	1	2	2	1	2	11.9	11.9	11.9	19.693	176	176	0	13.067	By MS/MS	By MS/MS	By MS/MS	By MS/MS	By MS/MS	By MS/MS	11.9	5.1	11.9	11.9	5.1	11.9	324470	101410
Cre16.g672300.t1.2	Cre16.g672300.t1.2	8	8	8	Cre16.g672300.t1.2 pacid=30777735 definition=High mobility group protein annot-version=v5.5	1	8	8	8	8	7	5	8	7	8	8	7	5	8	7	8	8	7	5	8	7	8	37.9	37.9	37.9	22.663	206	206	0	71.227	By MS/MS	By MS/MS	By MS/MS	By MS/MS	By MS/MS	By MS/MS	37.9	37.9	24.3	37.9	34.5	37.9	7446600	2464400
Cre16.g672650.t1.2	Cre16.g672650.t1.2	2	2	2	Cre16.g672650.t1.2 pacid=30778052 gene-symbol=MCP14 definition=Mitochondrial substrate carrier protein annot-version=v5.5	1	2	2	2	2	2	2	1	1	2	2	2	2	1	1	2	2	2	2	1	1	2	12.7	12.7	12.7	29.207	275	275	0	16.853	By MS/MS	By MS/MS	By MS/MS	By MS/MS	By MS/MS	By MS/MS	12.7	12.7	12.7	4	8.7	12.7	546580	141730
Cre16.g672750.t1.2	Cre16.g672750.t1.2	2	2	2	Cre16.g672750.t1.2 pacid=30777182 annot-version=v5.5	1	2	2	2	2	2	2	1	2	2	2	2	2	1	2	2	2	2	2	1	2	2	7.1	7.1	7.1	35.396	338	338	0	13.943	By MS/MS	By MS/MS	By MS/MS	By MS/MS	By MS/MS	By MS/MS	7.1	7.1	7.1	3	7.1	7.1	719870	196510
Cre16.g674250.t1.2	Cre16.g674250.t1.2	3	3	3	Cre16.g674250.t1.2 pacid=30777848 gene-symbol=SRS10 definition=Serine/arginine-rich pre-mRNA splicing factor annot-version=v5.5	1	3	3	3	2	3	2	3	2	1	2	3	2	3	2	1	2	3	2	3	2	1	10.1	10.1	10.1	34.902	298	298	0	47.249	By MS/MS	By MS/MS	By matching	By MS/MS	By MS/MS	By MS/MS	8.1	10.1	10.1	10.1	8.1	3	1130000	281690
Cre16.g677900.t1.1	Cre16.g677900.t1.1	4	4	4	Cre16.g677900.t1.1 pacid=30777634 annot-version=v5.5	1	4	4	4	2	3	2	4	3	3	2	3	2	4	3	3	2	3	2	4	3	3	18	18	18	45.266	461	461	0	36.628	By MS/MS	By MS/MS	By MS/MS	By MS/MS	By MS/MS	By MS/MS	7.6	13.2	7.6	18	12.4	13.2	553110	95186
Cre16.g678050.t1.1	Cre16.g678050.t1.1	8	8	8	Cre16.g678050.t1.1 pacid=30778075 gene-symbol=SRE3 definition=serine/arginine repetitive matrix protein annot-version=v5.5	1	8	8	8	6	7	4	5	5	6	6	7	4	5	5	6	6	7	4	5	5	6	14	14	14	59.554	529	529	0	53.122	By MS/MS	By MS/MS	By MS/MS	By MS/MS	By MS/MS	By MS/MS	13.8	14	10	14	14	11	1588900	501720
Cre16.g680588.t1.1	Cre16.g680588.t1.1	7	7	7	Cre16.g680588.t1.1 pacid=30777005 annot-version=v5.5	1	7	7	7	5	6	7	6	5	7	5	6	7	6	5	7	5	6	7	6	5	7	18.7	18.7	18.7	40.018	395	395	0	54.682	By MS/MS	By MS/MS	By MS/MS	By MS/MS	By MS/MS	By MS/MS	15.4	17	18.7	17.2	17	18.7	1511300	349010
Cre16.g680900.t1.2	Cre16.g680900.t1.2	2	2	2	Cre16.g680900.t1.2 pacid=30777306 gene-symbol=RPB1 definition=DNA-directed RNA polymerase II, largest subunit annot-version=v5.5	1	2	2	2	1	1	0	1	2	2	1	1	0	1	2	2	1	1	0	1	2	2	1.8	1.8	1.8	198.53	1812	1812	0.0021322	10.974	By MS/MS	By matching		By MS/MS	By MS/MS	By matching	1.3	1.3	0	1.3	1.8	1.8	116030	20280
Cre16.g683793.t1.1	Cre16.g683793.t1.1	6	6	6	Cre16.g683793.t1.1 pacid=30777184 annot-version=v5.5	1	6	6	6	5	4	4	1	4	4	5	4	4	1	4	4	5	4	4	1	4	4	17.7	17.7	17.7	89.702	838	838	0	78.274	By MS/MS	By MS/MS	By MS/MS	By matching	By MS/MS	By MS/MS	14.8	9.9	11.8	1.8	11.8	11.9	867290	350020
Cre16.g685200.t1.1	Cre16.g685200.t1.1	2	2	2	Cre16.g685200.t1.1 pacid=30778004 annot-version=v5.5	1	2	2	2	2	1	0	1	1	2	2	1	0	1	1	2	2	1	0	1	1	2	3.1	3.1	3.1	109.03	1055	1055	0	13.975	By MS/MS	By matching		By matching	By MS/MS	By matching	3.1	1.4	0	1.4	1.4	3.1	143850	74590
Cre16.g687182.t1.1	Cre16.g687182.t1.1	9	9	9	Cre16.g687182.t1.1 pacid=30777686 annot-version=v5.5	1	9	9	9	8	7	7	3	4	4	8	7	7	3	4	4	8	7	7	3	4	4	20.1	20.1	20.1	63.246	586	586	0	66.939	By MS/MS	By MS/MS	By MS/MS	By MS/MS	By MS/MS	By MS/MS	20.1	15.2	15	6.7	10.4	10.4	4190100	1641800
Cre16.g689311.t1.1	Cre16.g689311.t1.1	2	2	2	Cre16.g689311.t1.1 pacid=30776956 annot-version=v5.5	1	2	2	2	2	2	2	2	1	2	2	2	2	2	1	2	2	2	2	2	1	2	9.5	9.5	9.5	27.099	253	253	0	11.536	By MS/MS	By MS/MS	By MS/MS	By MS/MS	By matching	By MS/MS	9.5	9.5	9.5	9.5	4.3	9.5	209260	58995
Cre16.g690500.t1.2	Cre16.g690500.t1.2	6	6	6	Cre16.g690500.t1.2 pacid=30777138 gene-symbol=NHP2 definition=Nucleolar protein, Small subunit of H/ACA snoRNPs annot-version=v5.5	1	6	6	6	5	6	6	4	5	5	5	6	6	4	5	5	5	6	6	4	5	5	34.6	34.6	34.6	17.664	162	162	0	50.187	By MS/MS	By MS/MS	By MS/MS	By MS/MS	By MS/MS	By MS/MS	22.8	34.6	34.6	22.8	34.6	24.7	1592500	334530
Cre16.g691550.t1.2	Cre16.g691550.t1.2	3	3	3	Cre16.g691550.t1.2 pacid=30778119 annot-version=v5.5	1	3	3	3	3	3	1	2	2	3	3	3	1	2	2	3	3	3	1	2	2	3	24.6	24.6	24.6	15.306	142	142	0	21.994	By MS/MS	By MS/MS	By matching	By MS/MS	By MS/MS	By MS/MS	24.6	24.6	4.9	15.5	15.5	24.6	670680	208580
Cre17.g697350.t1.2	Cre17.g697350.t1.2	8	8	8	Cre17.g697350.t1.2 pacid=30782323 annot-version=v5.5	1	8	8	8	7	7	6	6	6	5	7	7	6	6	6	5	7	7	6	6	6	5	29.4	29.4	29.4	32.516	303	303	0	54.362	By MS/MS	By MS/MS	By MS/MS	By MS/MS	By MS/MS	By MS/MS	27.1	27.1	21.1	22.8	22.8	19.1	2734600	927420
Cre17.g698000.t1.2	Cre17.g698000.t1.2	4	4	4	Cre17.g698000.t1.2 pacid=30782086 gene-symbol=ATP2 definition=Mitochondrial F1F0 ATP synthase, beta subunit annot-version=v5.5	1	4	4	4	4	4	4	4	3	3	4	4	4	4	3	3	4	4	4	4	3	3	11.5	11.5	11.5	61.821	574	574	0	36.48	By MS/MS	By MS/MS	By MS/MS	By MS/MS	By MS/MS	By MS/MS	11.5	11.5	11.5	11.5	8	8	704770	162730
Cre17.g701050.t1.2	Cre17.g701050.t1.2	2	2	2	Cre17.g701050.t1.2 pacid=30781632 annot-version=v5.5	1	2	2	2	2	2	2	2	1	1	2	2	2	2	1	1	2	2	2	2	1	1	6.6	6.6	6.6	57.657	595	595	0	24.72	By MS/MS	By MS/MS	By MS/MS	By MS/MS	By MS/MS	By MS/MS	6.6	6.6	6.6	6.6	4.5	2	860960	419250
Cre17.g701200.t2.1;Cre17.g701200.t1.2	Cre17.g701200.t2.1;Cre17.g701200.t1.2	9;9	9;9	9;9	Cre17.g701200.t2.1 pacid=30782127 gene-symbol=RPL14 definition=Cytosolic 80S ribosomal protein L14 annot-version=v5.5;Cre17.g701200.t1.2 pacid=30782128 gene-symbol=RPL14 definition=Cytosolic 80S ribosomal protein L14 annot-version=v5.5	2	9	9	9	7	6	7	5	4	4	7	6	7	5	4	4	7	6	7	5	4	4	55.5	55.5	55.5	15.341	137	137;137	0	58.406	By MS/MS	By MS/MS	By MS/MS	By MS/MS	By MS/MS	By MS/MS	50.4	40.1	51.8	35	25.5	35	2632300	931850
Cre17.g701500.t1.2	Cre17.g701500.t1.2	2	2	2	Cre17.g701500.t1.2 pacid=30782290 gene-symbol=DNJ1 definition=DnaJ-like protein annot-version=v5.5	1	2	2	2	2	2	2	1	2	1	2	2	2	1	2	1	2	2	2	1	2	1	6	6	6	48.354	450	450	0	20.184	By MS/MS	By MS/MS	By MS/MS	By MS/MS	By MS/MS	By MS/MS	6	6	6	4	6	4	629020	247800
Cre17.g701650.t1.2	Cre17.g701650.t1.2	2	2	2	Cre17.g701650.t1.2 pacid=30782062 gene-symbol=RPL27 definition=Cytosolic 80S ribosomal protein L27 annot-version=v5.5	1	2	2	2	2	1	1	1	1	1	2	1	1	1	1	1	2	1	1	1	1	1	15.6	15.6	15.6	15.265	135	135	0	13.121	By MS/MS	By MS/MS	By MS/MS	By MS/MS	By matching	By MS/MS	15.6	9.6	9.6	9.6	9.6	9.6	532960	148550
Cre17.g702650.t1.1	Cre17.g702650.t1.1	5	5	5	Cre17.g702650.t1.1 pacid=30782503 definition=High mobility group protein annot-version=v5.5	1	5	5	5	3	4	3	4	3	5	3	4	3	4	3	5	3	4	3	4	3	5	10.4	10.4	10.4	43.164	403	403	0	37.063	By MS/MS	By MS/MS	By MS/MS	By MS/MS	By MS/MS	By MS/MS	7.7	7.7	7.7	7.7	6.9	10.4	1508300	417070
Cre17.g703600.t2.1;Cre17.g703600.t1.2	Cre17.g703600.t2.1;Cre17.g703600.t1.2	3;3	3;3	3;3	Cre17.g703600.t2.1 pacid=30782621 gene-symbol=OFD1 definition=Basal body protein annot-version=v5.5;Cre17.g703600.t1.2 pacid=30782620 gene-symbol=OFD1 definition=Basal body protein annot-version=v5.5	2	3	3	3	3	3	3	2	3	2	3	3	3	2	3	2	3	3	3	2	3	2	3	3	3	139.03	1288	1288;1302	0	19.159	By MS/MS	By MS/MS	By MS/MS	By MS/MS	By MS/MS	By MS/MS	3	3	3	2.2	3	2.2	642320	201950
Cre17.g703750.t1.2	Cre17.g703750.t1.2	5	5	5	Cre17.g703750.t1.2 pacid=30782527 annot-version=v5.5	1	5	5	5	5	1	4	1	2	5	5	1	4	1	2	5	5	1	4	1	2	5	2.8	2.8	2.8	291.41	2847	2847	0	29.302	By MS/MS	By MS/MS	By MS/MS	By MS/MS	By MS/MS	By MS/MS	2.8	0.5	2.2	0.6	0.9	2.8	455020	253480
Cre17.g708750.t1.2	Cre17.g708750.t1.2	2	2	2	Cre17.g708750.t1.2 pacid=30782281 gene-symbol=NSG1 definition=Nitrogen-starvation/gametogenesis expressed protein [PMID: 18322145] annot-version=v5.5	1	2	2	2	1	2	2	2	2	2	1	2	2	2	2	2	1	2	2	2	2	2	9.2	9.2	9.2	34.457	314	314	0	17.256	By matching	By MS/MS	By MS/MS	By MS/MS	By MS/MS	By MS/MS	4.5	9.2	9.2	9.2	9.2	9.2	236770	20456
Cre17.g709550.t1.2	Cre17.g709550.t1.2	3	3	3	Cre17.g709550.t1.2 pacid=30782505 annot-version=v5.5	1	3	3	3	3	2	1	1	3	2	3	2	1	1	3	2	3	2	1	1	3	2	3.1	3.1	3.1	98.541	944	944	0	17.806	By MS/MS	By MS/MS	By matching	By MS/MS	By MS/MS	By MS/MS	3.1	2.3	1.2	1.2	3.1	1.9	319510	115870
Cre17.g710100.t1.1	Cre17.g710100.t1.1	3	3	3	Cre17.g710100.t1.1 pacid=30782724 annot-version=v5.5	1	3	3	3	2	1	2	1	2	1	2	1	2	1	2	1	2	1	2	1	2	1	9.4	9.4	9.4	48.101	458	458	0	16.42	By MS/MS	By MS/MS	By MS/MS	By matching	By matching	By MS/MS	5.2	4.1	5.9	1.7	5.9	1.7	116870	29191
Cre17.g718650.t1.2	Cre17.g718650.t1.2	9	9	9	Cre17.g718650.t1.2 pacid=30782229 annot-version=v5.5	1	9	9	9	8	7	6	4	4	6	8	7	6	4	4	6	8	7	6	4	4	6	29.7	29.7	29.7	48.587	462	462	0	58.089	By MS/MS	By MS/MS	By MS/MS	By MS/MS	By MS/MS	By MS/MS	26	20.8	17.3	11.3	12.6	18.6	1148700	350000
Cre17.g720250.t1.2	Cre17.g720250.t1.2	2	2	2	Cre17.g720250.t1.2 pacid=30782643 gene-symbol=LHCB4 definition=Light-harvesting minor chlorophyll a/b binding protein of photosystem II annot-version=v5.5	1	2	2	2	1	1	2	2	0	1	1	1	2	2	0	1	1	1	2	2	0	1	11.1	11.1	11.1	29.938	280	280	0	14.846	By MS/MS	By matching	By matching	By MS/MS		By MS/MS	6.8	6.8	11.1	11.1	0	4.3	199980	19420
Cre17.g720750.t1.2	Cre17.g720750.t1.2	2	2	2	Cre17.g720750.t1.2 pacid=30782685 gene-symbol=TRF4 definition=Class-II RNA nucleotidyl transferase annot-version=v5.5	1	2	2	2	1	2	1	1	2	1	1	2	1	1	2	1	1	2	1	1	2	1	3.2	3.2	3.2	113.76	1117	1117	0.0021368	10.979	By MS/MS	By MS/MS	By MS/MS	By MS/MS	By MS/MS	By MS/MS	1	3.2	1	1	3.2	1	853030	151420
Cre17.g721500.t1.2	Cre17.g721500.t1.2	4	4	4	Cre17.g721500.t1.2 pacid=30782074 gene-symbol=STA2 definition=Granule-bound starch synthase I annot-version=v5.5	1	4	4	4	4	3	3	2	3	3	4	3	3	2	3	3	4	3	3	2	3	3	5.6	5.6	5.6	76.617	726	726	0	27.013	By MS/MS	By MS/MS	By MS/MS	By MS/MS	By MS/MS	By MS/MS	5.6	4.3	4.3	4.3	4.3	4.3	852320	379390
Cre17.g724850.t1.2	Cre17.g724850.t1.2	7	7	7	Cre17.g724850.t1.2 pacid=30782603 annot-version=v5.5	1	7	7	7	6	5	6	6	5	7	6	5	6	6	5	7	6	5	6	6	5	7	17	17	17	53.241	495	495	0	56.884	By MS/MS	By MS/MS	By MS/MS	By MS/MS	By MS/MS	By MS/MS	14.7	12.1	14.3	14.7	12.3	17	1964100	549490
Cre17.g727700.t1.1	Cre17.g727700.t1.1	6	6	6	Cre17.g727700.t1.1 pacid=30782559 gene-symbol=HEL65 definition=DEAD box ATP-dependent RNA helicase annot-version=v5.5	1	6	6	6	6	5	5	4	3	4	6	5	5	4	3	4	6	5	5	4	3	4	9.4	9.4	9.4	86.791	826	826	0	42.05	By MS/MS	By MS/MS	By MS/MS	By MS/MS	By MS/MS	By MS/MS	9.4	8	8	6.7	5.2	5.7	1068900	467590
Cre17.g731850.t1.2	Cre17.g731850.t1.2	5	5	5	Cre17.g731850.t1.2 pacid=30781740 definition=Short-chain dehydrogenase/reductase annot-version=v5.5	1	5	5	5	4	4	3	3	2	3	4	4	3	3	2	3	4	4	3	3	2	3	20.9	20.9	20.9	31.271	301	301	0	31.526	By MS/MS	By MS/MS	By MS/MS	By MS/MS	By MS/MS	By MS/MS	15.3	20.9	15.3	14.6	9.6	15.3	547250	249480
Cre17.g737200.t1.2	Cre17.g737200.t1.2	2	2	2	Cre17.g737200.t1.2 pacid=30782650 annot-version=v5.5	1	2	2	2	1	2	2	0	0	0	1	2	2	0	0	0	1	2	2	0	0	0	4.1	4.1	4.1	66.929	607	607	0	11.452	By MS/MS	By MS/MS	By matching				1.8	4.1	4.1	0	0	0	105290	20052
Cre17.g737250.t1.2	Cre17.g737250.t1.2	11	11	10	Cre17.g737250.t1.2 pacid=30781623 gene-symbol=EFG5 definition=U5 small nuclear ribonucleoprotein protein annot-version=v5.5	1	11	11	10	10	10	8	5	3	4	10	10	8	5	3	4	9	9	7	4	3	4	12.9	12.9	11.9	109.24	989	989	0	70.74	By MS/MS	By MS/MS	By MS/MS	By MS/MS	By MS/MS	By MS/MS	12.9	12	10.7	5.7	3.5	4.9	1966900	579800
Cre17.g738850.t1.2	Cre17.g738850.t1.2	9	9	9	Cre17.g738850.t1.2 pacid=30782674 annot-version=v5.5	1	9	9	9	8	8	7	8	6	7	8	8	7	8	6	7	8	8	7	8	6	7	14.3	14.3	14.3	107.24	1052	1052	0	79.749	By MS/MS	By MS/MS	By MS/MS	By MS/MS	By MS/MS	By MS/MS	14.1	14.1	12.6	14.1	9.3	12.1	1915400	465620
Cre17.g740350.t1.1	Cre17.g740350.t1.1	2	2	2	Cre17.g740350.t1.1 pacid=30782431 annot-version=v5.5	1	2	2	2	1	1	0	2	2	0	1	1	0	2	2	0	1	1	0	2	2	0	1.5	1.5	1.5	180.26	1890	1890	0	12.114	By MS/MS	By MS/MS		By MS/MS	By MS/MS		0.7	0.7	0	1.5	1.5	0	143930	30004
Cre17.g744147.t1.1	Cre17.g744147.t1.1	6	6	6	Cre17.g744147.t1.1 pacid=30781910 annot-version=v5.5	1	6	6	6	6	5	2	3	2	3	6	5	2	3	2	3	6	5	2	3	2	3	2.4	2.4	2.4	240.36	2168	2168	0	39.757	By MS/MS	By MS/MS	By MS/MS	By MS/MS	By MS/MS	By MS/MS	2.4	2.3	1.1	1.8	1.1	1.6	602810	237740
Cre17.g744897.t1.1	Cre17.g744897.t1.1	2	2	2	Cre17.g744897.t1.1 pacid=30782020 annot-version=v5.5	1	2	2	2	1	2	1	1	0	0	1	2	1	1	0	0	1	2	1	1	0	0	6.2	6.2	6.2	45.66	453	453	0	12.47	By MS/MS	By MS/MS	By MS/MS	By matching			2.2	6.2	2.2	4	0	0	98079	40251
Cre19.g750147.t1.1	Cre19.g750147.t1.1	5	5	5	Cre19.g750147.t1.1 pacid=30778342 annot-version=v5.5	1	5	5	5	5	5	5	3	5	5	5	5	5	3	5	5	5	5	5	3	5	5	14	14	14	67.841	708	708	0	64.959	By MS/MS	By MS/MS	By MS/MS	By MS/MS	By MS/MS	By MS/MS	14	14	14	8.9	14	14	1686700	474730
REV__Cre03.g205809.t1.1	REV__Cre03.g205809.t1.1	2	2	2	Cre03.g205809.t1.1 pacid=30786807 annot-version=v5.5	1	2	2	2	2	2	1	2	1	1	2	2	1	2	1	1	2	2	1	2	1	1	0	0	0	72.626	715	715	0.0021882	11.421	By MS/MS	By MS/MS	By MS/MS	By MS/MS	By matching	By matching	0	0	0	0	0	0	525860	177400
[truncated: 31 more columns]
